# Supplementary material for: Identification and Comparative Analysis of Differential Gene Expression in Soybean Leaf Tissue under Drought and Flooding Stress Revealed by RNA-Seq
Source: Front Plant Sci. 2016 Jul 19;7:1044. doi: 10.3389/fpls.2016.01044 (PMC4950259; doi:10.3389/fpls.2016.01044)
Supplement: Supplementary Table 2 — List of DEGs in, (A) drought, (B) flooding stressed leaf tissue compared to non-stressed control tissue. (C) List of DEGs in flooding stressed leaf tissue compared to drought stressed leaf tissue. [file Table2.XLSX]

## Sheet: S. table 2A
Supplementary Table 2A. List of DEGs in drought stressed leaf tissue compared to non-stressed control tissue.
Down-regulated genes								Up-regulated genes
gene	locus	control	drought	log2(fold_change)	annotation			gene	locus	control	drought	log2(fold_change)	annotation
Glyma14g37721	Gm14:47031969-47033728	26.2257	0.33059	-6.30979	Q8LDM8 CCT motif family protein n=1 Tax=Arabidopsis thaliana RepID=Q8LDM8_ARATH			Glyma06g12530	Gm06:9700778-9704185	1.27086	5.08488	2.0004	Q2HV99 Protein kinase; Type I EGF n=1 Tax=Medicago truncatula RepID=Q2HV99_MEDTR
Glyma09g02460	Gm09:1651968-1658743	17.5688	0.270799	-6.01965	G7JIR7 Polygalacturonase n=1 Tax=Medicago truncatula RepID=G7JIR7_MEDTR			Glyma13g22200	Gm13:25792150-25793887	0.913159	3.65687	2.00167	Q53LU7 Expressed protein n=1 Tax=Oryza sativa Japonica Group RepID=Q53LU7_ORYSJ
Glyma02g45810	Gm02:49960884-49964843	63.8576	0.993433	-6.00629	G7K3F3 Small heat shock protein C4 n=1 Tax=Medicago truncatula RepID=G7K3F3_MEDTR			Glyma20g04511	Gm20:4741451-4743998	0.373606	1.49621	2.00173	G7JG94 Myb-like protein A n=1 Tax=Medicago truncatula RepID=G7JG94_MEDTR
Glyma02g39660	Gm02:44905562-44907256	9.877	0.159325	-5.95403	Q8LDM8 CCT motif family protein n=1 Tax=Arabidopsis thaliana RepID=Q8LDM8_ARATH			Glyma04g10860	Gm04:9111516-9113034	2.43536	9.75331	2.00176	E4MW96 mRNA, clone: RTFL01-07-O09 n=1 Tax=Eutrema halophilum RepID=E4MW96_THEHA
Glyma10g38601	Gm10:46391856-46393470	13.8972	0.224219	-5.95374	O04281 Gibberellin 20-oxidase n=1 Tax=Phaseolus vulgaris RepID=O04281_PHAVU			Glyma16g17240	Gm16:18621296-18626623	0.630625	2.52727	2.00273	F4KD53 Major facilitator protein n=1 Tax=Arabidopsis thaliana RepID=F4KD53_ARATH
Glyma10g39740	Gm10:47374130-47375767	699.671	12.9204	-5.75896	F6H7K5 Thiamine thiazole synthase 2, chloroplastic n=2 Tax=Vitis vinifera RepID=THI42_VITVI			Glyma02g08600	Gm02:6686832-6693601	46.5493	186.554	2.00276	Q42809 GmCK1p n=1 Tax=Glycine max RepID=Q42809_SOYBN
Glyma06g35550	Gm06:37357684-37361017	114.251	2.30282	-5.63266	E1ZJ74 Expressed protein n=1 Tax=Chlorella variabilis RepID=E1ZJ74_CHLVA			Glyma02g26890	Gm02:27994967-27997446	7.55914	30.2958	2.00283	G7LEE7 Ubiquitin carboxyl-terminal hydrolase family protein n=1 Tax=Medicago truncatula RepID=G7LEE7_MEDTR
Glyma18g09516	Gm18:8404207-8417298	7.7986	0.159992	-5.60714	G7K4B9 Glycerophosphodiesterase-like protein n=1 Tax=Medicago truncatula RepID=G7K4B9_MEDTR			Glyma09g08920	Gm09:8361706-8364142	2.34097	9.39242	2.00439	I1L1W5 Pectinesterase n=1 Tax=Glycine max RepID=I1L1W5_SOYBN
Glyma14g02970	Gm14:1874610-1878417	44.8152	0.959181	-5.54604	G7K3F3 Small heat shock protein C4 n=1 Tax=Medicago truncatula RepID=G7K3F3_MEDTR			Glyma20g31780	Gm20:40388910-40390642	2.6088	10.477	2.00576	G7I9N1 LOB domain-containing protein n=1 Tax=Medicago truncatula RepID=G7I9N1_MEDTR
Glyma16g14385	Gm16:15233154-15235520	10.2795	0.247604	-5.37559	NA			Glyma14g09540	Gm14:7637242-7638670	3.09519	12.4404	2.00693	Q0PJK6 MYB transcription factor MYB81 n=1 Tax=Glycine max RepID=Q0PJK6_SOYBN
Glyma15g01500	Gm15:965128-967177	6.15893	0.150193	-5.35779	O24648 2-oxoglutarate-dependent dioxygenase n=1 Tax=Pisum sativum RepID=O24648_PEA			Glyma06g17020	Gm06:13364742-13371838	9.25209	37.2001	2.00745	G7J2Q6 ATP-dependent Clp protease ATP-binding subunit n=1 Tax=Medicago truncatula RepID=G7J2Q6_MEDTR
Glyma15g14675	Gm15:11163032-11165919	15.4767	0.397244	-5.28393	NA			Glyma06g15990	Gm06:12557717-12558996	1.21729	4.89964	2.00901	B2ZGR0 NAC domain protein (Fragment) n=1 Tax=Glycine max RepID=B2ZGR0_SOYBN
Glyma06g06900	Gm06:4993609-4994245	37.3835	1.15858	-5.01197	NA			Glyma07g03370	Gm07:2368317-2370522	9.39462	37.8167	2.00912	G7JGX9 Palmitoyl-monogalactosyldiacylglycerol delta-7 desaturase n=1 Tax=Medicago truncatula RepID=G7JGX9_MEDTR
Glyma12g07926	Gm12:5590876-5594116	5.9278	0.200851	-4.8833	G7JSL7 Zinc finger protein CONSTANS-like protein n=1 Tax=Medicago truncatula RepID=G7JSL7_MEDTR			Glyma12g28510	Gm12:31865006-31870136	0.989563	3.98871	2.01106	Q1SKS7 Peptide transporter PTR1 n=1 Tax=Medicago truncatula RepID=Q1SKS7_MEDTR
Glyma03g26150	Gm03:33496016-33500675	1.36962	0.0494188	-4.79257	B9RCZ2 Triacylglycerol lipase, putative n=1 Tax=Ricinus communis RepID=B9RCZ2_RICCO			Glyma09g05010	Gm09:3798126-3800656	9.69069	39.066	2.01124	G7JLH4 Xyloglucan 6-xylosyltransferase n=1 Tax=Medicago truncatula RepID=G7JLH4_MEDTR
Glyma02g12710	Gm02:10986357-10988757	9.93449	0.36135	-4.78098	NA			Glyma13g05010	Gm13:5231936-5233394	0.571951	2.30686	2.01197	G7KK16 Mitochondrial chaperone BCS1 n=1 Tax=Medicago truncatula RepID=G7KK16_MEDTR
Glyma16g30000	Gm16:33667116-33674724	3.16374	0.115681	-4.7734	Q1RU51 Transporter, putative n=1 Tax=Medicago truncatula RepID=Q1RU51_MEDTR			Glyma03g28970	Gm03:36928938-36932534	7.56985	30.5332	2.01204	B9T6H7 Glycerol-3-phosphate dehydrogenase, putative n=1 Tax=Ricinus communis RepID=B9T6H7_RICCO
Glyma17g13010	Gm17:9927141-9928942	17.27	0.659456	-4.71085	Q0PJJ2 MYB transcription factor MYB109 n=1 Tax=Glycine max RepID=Q0PJJ2_SOYBN			Glyma16g03190	Gm16:2746132-2751663	13.794	55.6982	2.01359	Q43450 G-box binding factor (Fragment) n=1 Tax=Glycine max RepID=Q43450_SOYBN
Glyma20g27990	Gm20:36959060-36961228	685.501	26.4897	-4.69366	F6H7K5 Thiamine thiazole synthase 2, chloroplastic n=2 Tax=Vitis vinifera RepID=THI42_VITVI			Glyma06g11050	Gm06:8430912-8433270	7.79885	31.4959	2.01383	G7KA58 Clavesin n=1 Tax=Medicago truncatula RepID=G7KA58_MEDTR
Glyma19g27530	Gm19:34851350-34852853	257.808	10.2154	-4.65748	Q41016 GA protein n=1 Tax=Pisum sativum RepID=Q41016_PEA			Glyma08g07490	Gm08:5344654-5345553	24.0248	97.0245	2.01383	B9S9C9 Copper ion binding protein, putative n=1 Tax=Ricinus communis RepID=B9S9C9_RICCO
Glyma20g03910	Gm20:3808551-3810785	10.4172	0.434737	-4.58269	NA			Glyma13g04100	Gm13:4435707-4438848	15.5641	62.8637	2.01401	B6TI63 RHC1A n=2 Tax=Zea mays RepID=B6TI63_MAIZE
Glyma15g36200	Gm15:41326972-41330362	4.88484	0.205608	-4.57034	G7LID0 Auxin-induced protein 5NG4 n=2 Tax=Medicago truncatula RepID=G7LID0_MEDTR			Glyma08g27590	Gm08:21885326-21888000	24.135	97.5141	2.01448	Q69F96 Reversibly glycosylated protein n=1 Tax=Phaseolus vulgaris RepID=Q69F96_PHAVU
Glyma15g03620	Gm15:2525245-2532313	72.1318	3.06087	-4.55862	G7IHR0 Beta-glucosidase D4 n=1 Tax=Medicago truncatula RepID=G7IHR0_MEDTR			Glyma13g19500	Gm13:22980601-22985043	48.763	197.055	2.01474	G7ICM1 Soluble inorganic pyrophosphatase n=3 Tax=Medicago truncatula RepID=G7ICM1_MEDTR
Glyma08g41090	Gm08:41132752-41134501	9.54965	0.414049	-4.52757	Q84JK8 Probable membrane-associated kinase regulator 6 n=1 Tax=Arabidopsis thaliana RepID=MAKR6_ARATH			Glyma06g08630	Gm06:6304918-6310015	1.79437	7.25242	2.01498	Q6EQH5 Membrane protein-like n=1 Tax=Oryza sativa Japonica Group RepID=Q6EQH5_ORYSJ
Glyma16g05350	Gm16:4672459-4674745	1278.16	56.2693	-4.50558	Q41016 GA protein n=1 Tax=Pisum sativum RepID=Q41016_PEA			Glyma08g23340	Gm08:17812404-17815525	1.52395	6.16029	2.01519	Q53VE1 Ser/Thr protein kinase (Fragment) n=1 Tax=Lotus japonicus RepID=Q53VE1_LOTJA
Glyma07g00380	Gm07:171122-173661	10.7211	0.472566	-4.5038	B9RHU3 Mitochondrial deoxynucleotide carrier, putative n=1 Tax=Ricinus communis RepID=B9RHU3_RICCO			Glyma03g19810	Gm03:25081858-25085662	22.6273	91.5395	2.01633	B6TKR3 Catalytic/ hydrolase n=2 Tax=Zea mays RepID=B6TKR3_MAIZE
Glyma13g35410	Gm13:36829872-36835932	9.15041	0.41653	-4.45734	Q7XSK0 Beta-glucosidase 18 n=4 Tax=Oryza sativa RepID=BGL18_ORYSJ			Glyma09g31951	Gm09:38528157-38534468	3.25863	13.198	2.01798	G7L902 Lipase n=1 Tax=Medicago truncatula RepID=G7L902_MEDTR
Glyma19g02810	Gm19:2742690-2745731	24.7262	1.13715	-4.44255	Q9FNT1 Alpha-expansin n=1 Tax=Cicer arietinum RepID=Q9FNT1_CICAR			Glyma03g40720	Gm03:46384671-46388808	4.4	17.8286	2.01862	G7L1X0 GDP-mannose 3 5-epimerase n=1 Tax=Medicago truncatula RepID=G7L1X0_MEDTR
Glyma07g16690	Gm07:16372116-16376639	13.6752	0.633807	-4.43138	B9SV39 Cytoplasmic dynein light chain, putative n=1 Tax=Ricinus communis RepID=B9SV39_RICCO			Glyma02g01150	Gm02:856600-860695	10.372	42.0429	2.01917	C6TDV2 Serine/threonine protein kinase n=1 Tax=Glycine max RepID=C6TDV2_SOYBN
Glyma06g04810	Gm06:3387545-3390589	16.3484	0.773001	-4.40253	D3YBD3 Proteinase inhibitor n=1 Tax=Trifolium repens RepID=D3YBD3_TRIRP			Glyma16g09120	Gm16:8724504-8724934	5.95357	24.1555	2.02052	C6TBN2 Probable aldo-keto reductase 1 n=1 Tax=Glycine max RepID=AKR1_SOYBN
Glyma04g40000	Gm04:46149636-46151541	55.7012	2.64498	-4.39638	B7U8J1 Expansin 2 (Fragment) n=1 Tax=Ziziphus jujuba RepID=B7U8J1_ZIZJJ			Glyma16g21950	Gm16:25307781-25310892	1.13196	4.59405	2.02095	G7LGW8 Pentatricopeptide repeat-containing protein n=1 Tax=Medicago truncatula RepID=G7LGW8_MEDTR
Glyma05g27450	Gm05:33381964-33382883	24.2412	1.16708	-4.37649	NA			Glyma09g05100	Gm09:3876211-3877612	13.9907	56.8051	2.02155	B8XJZ3 Cold-regulated protein n=1 Tax=Glycine max RepID=B8XJZ3_SOYBN
Glyma15g06816	Gm15:4788303-4795751	26.072	1.25535	-4.37634	Q9XFB4 PR1a n=1 Tax=Glycine max RepID=Q9XFB4_SOYBN			Glyma15g18290	Gm15:14983819-14987785	1.9241	7.81266	2.02163	C6FF62 CC-NBS-LRR class disease resistance protein n=1 Tax=Glycine max RepID=C6FF62_SOYBN
Glyma08g05510	Gm08:3951750-3955062	7.2737	0.360519	-4.33454	Q9FHB6 Mate efflux domain-containing protein n=1 Tax=Arabidopsis thaliana RepID=Q9FHB6_ARATH			Glyma13g29360	Gm13:32267697-32273719	5.05143	20.5131	2.02178	G7IP30 Hydrolase-like protein n=1 Tax=Medicago truncatula RepID=G7IP30_MEDTR
Glyma06g14850	Gm06:11635851-11637881	71.0979	3.60487	-4.30179	B7U8J1 Expansin 2 (Fragment) n=1 Tax=Ziziphus jujuba RepID=B7U8J1_ZIZJJ			Glyma16g29030	Gm16:32932563-32936823	0.26622	1.08127	2.02203	G7KJM6 C4-dicarboxylate transporter/malic acid transport protein n=1 Tax=Medicago truncatula RepID=G7KJM6_MEDTR
Glyma08g05130	Gm08:3654156-3657622	16.3962	0.854956	-4.26137	B9MST1 Circadian clock-associated FKF1 n=1 Tax=Glycine max RepID=B9MST1_SOYBN			Glyma08g15440	Gm08:11208557-11213188	1.24704	5.06568	2.02224	G7LC96 Auxin-induced protein 5NG4 n=2 Tax=Medicago truncatula RepID=G7LC96_MEDTR
Glyma06g23330	Gm06:20485336-20488428	6.81295	0.358678	-4.24752	G7JX26 Protein CHUP1 n=1 Tax=Medicago truncatula RepID=G7JX26_MEDTR			Glyma20g00910	Gm20:635602-642135	6.69889	27.2524	2.02439	Q9SYP0 F9H16.4 protein n=1 Tax=Arabidopsis thaliana RepID=Q9SYP0_ARATH
Glyma15g01420	Gm15:892589-896246	14.7794	0.778912	-4.24599	Q1AK41 Plastid ATP/ADP transport protein 2 n=1 Tax=Manihot esculenta RepID=Q1AK41_MANES			Glyma01g32680	Gm01:44207946-44213690	1.70103	6.9246	2.02532	G7KX34 Protein kinase, putative n=1 Tax=Medicago truncatula RepID=G7KX34_MEDTR
Glyma08g47220	Gm08:46138426-46143002	1.3724	0.0727579	-4.23745	B9S566 Receptor protein kinase CLAVATA1, putative n=1 Tax=Ricinus communis RepID=B9S566_RICCO			Glyma05g32510	Gm05:37446454-37452401	11.0017	44.8328	2.02683	Q75PK5 Mitogen-activated kinase kinase kinase alpha n=1 Tax=Lotus japonicus RepID=Q75PK5_LOTJA
Glyma01g06030	Gm01:5873668-5876124	99.8622	5.36521	-4.21823	C6TN48 Expansin A4 n=1 Tax=Glycine max RepID=C6TN48_SOYBN			Glyma07g02660	Gm07:1802524-1805005	7.83628	31.9542	2.02777	Q53VE1 Ser/Thr protein kinase (Fragment) n=1 Tax=Lotus japonicus RepID=Q53VE1_LOTJA
Glyma17g36500	Gm17:40429969-40435388	5.3765	0.289635	-4.21436	G7I588 Myb family transcription factor-like protein n=1 Tax=Medicago truncatula RepID=G7I588_MEDTR			Glyma01g38260	Gm01:50394489-50396439	1.68517	6.88095	2.02972	Q75GV2 Expressed protein n=3 Tax=Oryza sativa RepID=Q75GV2_ORYSJ
Glyma12g10670	Gm12:8620533-8624263	5.21095	0.287876	-4.17803	G7JDG8 Septum-promoting GTP-binding protein n=1 Tax=Medicago truncatula RepID=G7JDG8_MEDTR			Glyma18g52530	Gm18:61112206-61114202	1.57422	6.43021	2.03022	G7KWS3 THO complex subunit n=1 Tax=Medicago truncatula RepID=G7KWS3_MEDTR
Glyma02g12140	Gm02:10367090-10369542	150.685	8.48071	-4.1512	C6TN48 Expansin A4 n=1 Tax=Glycine max RepID=C6TN48_SOYBN			Glyma09g35420	Gm09:41541620-41542103	2.36871	9.67993	2.03089	G7JAQ1 Auxin-induced protein-like protein n=1 Tax=Medicago truncatula RepID=G7JAQ1_MEDTR
Glyma10g37030	Gm10:45062621-45063833	5.07554	0.29216	-4.11873	G7ID02 Nodulin-like protein n=1 Tax=Medicago truncatula RepID=G7ID02_MEDTR			Glyma06g04065	Gm06:2834132-2843722	9.70234	39.6832	2.03213	G7J5U1 Uroporphyrinogen-III synthase n=1 Tax=Medicago truncatula RepID=G7J5U1_MEDTR
Glyma03g28910	Gm03:36874896-36878051	11.0807	0.638083	-4.11816	H9D2G5 Cytokinin dehydrogenase 1 n=1 Tax=Glycine max RepID=H9D2G5_SOYBN			Glyma09g03860	Gm09:2784356-2787546	3.14952	12.892	2.03327	Q9LSN5 AT3g17120/K14A17_24 n=1 Tax=Arabidopsis thaliana RepID=Q9LSN5_ARATH
Glyma14g16610	Gm14:17947550-17949418	3.4893	0.20633	-4.07991	B9RS83 Sulfate transporter, putative n=1 Tax=Ricinus communis RepID=B9RS83_RICCO			Glyma14g05360	Gm14:3795250-3797165	5.47405	22.4127	2.03364	O04076 ACC-oxidase n=1 Tax=Vigna angularis RepID=O04076_PHAAN
Glyma18g38130	Gm18:45474901-45478085	1.74083	0.103261	-4.07541	NA			Glyma10g41580	Gm10:48624013-48629610	9.44752	38.7219	2.03514	Q9FVL1 Phosphatidic acid phosphatase beta n=1 Tax=Vigna unguiculata RepID=Q9FVL1_VIGUN
Glyma14g24030	Gm14:28672540-28678343	10.0028	0.605012	-4.04729	G7J316 Auxin-induced protein 5NG4 n=2 Tax=Medicago truncatula RepID=G7J316_MEDTR			Glyma11g34210	Gm11:36088261-36090642	2.03715	8.35473	2.03604	B9SDY6 Kinase, putative n=1 Tax=Ricinus communis RepID=B9SDY6_RICCO
Glyma06g18480	Gm06:14802425-14807142	3.32336	0.203661	-4.0284	B9SGV5 Stachyose synthase, putative n=1 Tax=Ricinus communis RepID=B9SGV5_RICCO			Glyma17g34140	Gm17:38003229-38006437	26.3603	108.193	2.03717	I1MX63 Enhancer of rudimentary homolog n=1 Tax=Glycine max RepID=I1MX63_SOYBN
Glyma17g07450	Gm17:5443221-5444723	3.31555	0.205306	-4.0134	Q9FHH5 Protein GLUTAMINE DUMPER 3 n=1 Tax=Arabidopsis thaliana RepID=GDU3_ARATH			Glyma11g09186	Gm11:6506608-6507476	16.8657	69.253	2.03779	NA
Glyma04g33610	Gm04:39240660-39242267	152.906	9.66035	-3.98442	Q49RB3 Gip1-like protein n=1 Tax=Populus tomentosa RepID=Q49RB3_POPTO			Glyma13g01631	Gm13:1313033-1314024	22.1242	90.8544	2.03793	NA
Glyma2227s50	scaffold_2227:41-1000	8.81503	0.563633	-3.96714	B9RYQ7 Short-chain dehydrogenase, putative n=1 Tax=Ricinus communis RepID=B9RYQ7_RICCO			Glyma15g01820	Gm15:1200170-1204142	4.00979	16.4778	2.03892	B9RQP5 Serine/threonine-protein kinase PBS1, putative n=1 Tax=Ricinus communis RepID=B9RQP5_RICCO
Glyma13g03510	Gm13:3514001-3519506	18.7802	1.20117	-3.9667	G7J316 Auxin-induced protein 5NG4 n=2 Tax=Medicago truncatula RepID=G7J316_MEDTR			Glyma20g35841	Gm20:44050251-44054767	0.35902	1.47548	2.03904	Q8S9K9 AT4g03420/F9H3_4 n=1 Tax=Arabidopsis thaliana RepID=Q8S9K9_ARATH
Glyma14g02540	Gm14:1564679-1565860	21.0951	1.35193	-3.96382	NA			Glyma19g28515	Gm19:36056234-36058548	1.31024	5.38537	2.03921	G7KZD9 NAC domain protein n=1 Tax=Medicago truncatula RepID=G7KZD9_MEDTR
Glyma05g38130	Gm05:41535462-41536369	109.11	7.03388	-3.95532	P25096 Protein P21 n=1 Tax=Glycine max RepID=P21_SOYBN			Glyma06g14090	Gm06:11126619-11127561	1.40312	5.76773	2.03937	NA
Glyma08g42500	Gm08:42479658-42481809	17.6012	1.13566	-3.95408	G7J1R6 Anthranilate N-benzoyltransferase protein n=1 Tax=Medicago truncatula RepID=G7J1R6_MEDTR			Glyma07g00740	Gm07:398218-401495	1.68184	6.91405	2.03949	G7JJD6 Mitochondrial carnitine/acylcarnitine carrier protein n=1 Tax=Medicago truncatula RepID=G7JJD6_MEDTR
Glyma06g12840	Gm06:10019824-10022840	12.9487	0.867698	-3.89948	F4I5D5 Nodulin MtN21 /EamA-like transporter protein n=1 Tax=Arabidopsis thaliana RepID=F4I5D5_ARATH			Glyma14g34930	Gm14:43652113-43655492	0.663648	2.72862	2.03968	G7KB81 Receptor protein kinase-like protein n=2 Tax=Medicago truncatula RepID=G7KB81_MEDTR
Glyma20g30580	Gm20:39267631-39268777	8.0393	0.538751	-3.89938	G7ID02 Nodulin-like protein n=1 Tax=Medicago truncatula RepID=G7ID02_MEDTR			Glyma20g25360	Gm20:35040654-35046158	6.74539	27.7414	2.04007	B9SLZ1 Protein phosphatase, putative n=1 Tax=Ricinus communis RepID=B9SLZ1_RICCO
Glyma04g07690	Gm04:6021785-6023171	3.77662	0.255166	-3.88759	B9RS83 Sulfate transporter, putative n=1 Tax=Ricinus communis RepID=B9RS83_RICCO			Glyma09g16780	Gm09:20196117-20199921	7.55297	31.0642	2.04014	Q9FG35 Emb|CAB82953.1 n=1 Tax=Arabidopsis thaliana RepID=Q9FG35_ARATH
Glyma15g11470	Gm15:8426082-8427433	26.3634	1.80333	-3.8698	E4MY81 mRNA, clone: RTFL01-44-P14 n=1 Tax=Eutrema halophilum RepID=E4MY81_THEHA			Glyma01g27810	Gm01:37231576-37233997	6.53997	26.9091	2.04074	G7JMZ5 BAHD acyltransferase DCR n=1 Tax=Medicago truncatula RepID=G7JMZ5_MEDTR
Glyma05g04920	Gm05:4127453-4128819	7.06378	0.492298	-3.84284	A5JNJ5 Dehydration-responsive element binding protein 6 n=1 Tax=Glycine max RepID=A5JNJ5_SOYBN			Glyma15g06520	Gm15:4604464-4611989	3.02639	12.4535	2.04089	A7UQT0 Oligopeptide transporter n=1 Tax=Medicago truncatula RepID=A7UQT0_MEDTR
Glyma01g34300	Gm01:46676161-46677711	62.9302	4.4045	-3.8367	P39657 RuBisCO-associated protein n=1 Tax=Glycine max RepID=RUAP_SOYBN			Glyma18g19710	Gm18:21464359-21467454	4.64535	19.1171	2.041	Q9C5G6 Peptidase C15, pyroglutamyl peptidase I-like protein n=1 Tax=Arabidopsis thaliana RepID=Q9C5G6_ARATH
Glyma18g10110	Gm18:8922517-8925348	17.4679	1.22826	-3.83002	B7F1Y4 cDNA clone:002-156-B04, full insert sequence n=1 Tax=Oryza sativa Japonica Group RepID=B7F1Y4_ORYSJ			Glyma13g20197	Gm13:23628378-23629786	51.7466	213.075	2.04183	Q84LN3 Ubiquitin n=2 Tax=core eudicotyledons RepID=Q84LN3_HEVBR
Glyma19g33440	Gm19:41068726-41072399	4.80178	0.339467	-3.82222	C1L343 Rop-interacting receptor-like cytoplasmic kinase 2 n=1 Tax=Medicago truncatula RepID=C1L343_MEDTR			Glyma16g32530	Gm16:35669989-35674391	7.61833	31.3876	2.04265	G7KQE8 Fructokinase n=1 Tax=Medicago truncatula RepID=G7KQE8_MEDTR
Glyma08g20800	Gm08:15788013-15790335	4.9718	0.352283	-3.81896	E5D6S8 Acid phosphatase n=1 Tax=Phaseolus vulgaris RepID=E5D6S8_PHAVU			Glyma07g09730	Gm07:8186770-8189088	17.0562	70.2727	2.04267	Q9LHF1 Leucine-rich repeat extensin-like protein 4 n=1 Tax=Arabidopsis thaliana RepID=LRX4_ARATH
Glyma18g52620	Gm18:61181876-61184104	10.3294	0.733689	-3.81544	Q53NN2 Expressed protein n=2 Tax=Oryza sativa RepID=Q53NN2_ORYSJ			Glyma04g38590	Gm04:44957574-44971265	6.79688	28.0069	2.04284	D7SWF1 Beta-galactosidase n=1 Tax=Vitis vinifera RepID=D7SWF1_VITVI
Glyma03g39070	Gm03:45296753-45297266	20.2232	1.4424	-3.80947	B9SY33 DNA binding protein, putative n=1 Tax=Ricinus communis RepID=B9SY33_RICCO			Glyma12g17340	Gm12:17215916-17219647	0.242591	0.999716	2.04299	G7JF44 Receptor protein kinase n=1 Tax=Medicago truncatula RepID=G7JF44_MEDTR
Glyma14g01110	Gm14:601810-602648	9.54042	0.681445	-3.80738	NA			Glyma09g35883	Gm09:41757406-41765457	1.04386	4.30249	2.04325	G7JSI6 Nucleotide pyrophosphatase/phosphodiesterase n=1 Tax=Medicago truncatula RepID=G7JSI6_MEDTR
Glyma01g30390	Gm01:41062775-41066889	2.98847	0.213642	-3.80614	G7JP31 GDSL esterase/lipase CPRD49 n=1 Tax=Medicago truncatula RepID=G7JP31_MEDTR			Glyma20g28100	Gm20:37058860-37060389	1.83285	7.56529	2.04531	Q6NMR8 Protein FANTASTIC FOUR 3 n=1 Tax=Arabidopsis thaliana RepID=FAF3_ARATH
Glyma20g34620	Gm20:42987099-42991040	1.77849	0.127414	-3.80306	E8Z9A8 Phosphate transporter1-10 n=2 Tax=Glycine max RepID=E8Z9A8_SOYBN			Glyma12g10960	Gm12:8964387-8967004	42.3376	174.807	2.04575	B9S9N2 Xyloglucan endotransglucosylase/hydrolase protein 9, putative n=1 Tax=Ricinus communis RepID=B9S9N2_RICCO
Glyma11g35270	Gm11:36968442-36969563	2.99549	0.21463	-3.80287	Q52ZI3 Early flowering 4 n=1 Tax=Pisum sativum RepID=Q52ZI3_PEA			Glyma18g48910	Gm18:58325322-58327506	0.266891	1.10229	2.04618	G7KK16 Mitochondrial chaperone BCS1 n=1 Tax=Medicago truncatula RepID=G7KK16_MEDTR
Glyma01g16140	Gm01:20041371-20043743	6.0385	0.432905	-3.80207	Q39802 Cytokinin induced message n=1 Tax=Glycine max RepID=Q39802_SOYBN			Glyma11g07580	Gm11:5311659-5314521	11.9023	49.1754	2.0467	G7KF03 Mannan endo-1,4-beta-mannosidase n=1 Tax=Medicago truncatula RepID=G7KF03_MEDTR
Glyma20g30250	Gm20:38924740-38931311	16.87	1.22167	-3.78753	Q0PJE7 MYB transcription factor MYB135 (Fragment) n=1 Tax=Glycine max RepID=Q0PJE7_SOYBN			Glyma04g35880	Gm04:42400695-42403590	1.1704	4.83602	2.04682	B9RAZ4 Serine-threonine protein kinase, plant-type, putative n=1 Tax=Ricinus communis RepID=B9RAZ4_RICCO
Glyma16g26900	Gm16:30995406-30998099	47.2451	3.4438	-3.77809	Q9C503 NDH-dependent cyclic electron flow 5 n=2 Tax=Arabidopsis thaliana RepID=Q9C503_ARATH			Glyma12g36320	Gm12:39433487-39434828	0.830375	3.43142	2.04697	G8A245 Alpha-amylase/subtilisin inhibitor n=1 Tax=Medicago truncatula RepID=G8A245_MEDTR
Glyma17g13550	Gm17:10364994-10367323	50.6409	3.69898	-3.77511	G7JMP6 Pectate lyase n=1 Tax=Medicago truncatula RepID=G7JMP6_MEDTR			Glyma06g40740	Gm06:43913599-43918380	9.40548	38.9293	2.04928	C6ZS29 TIR-NBS-LRR type disease resistance protein n=1 Tax=Glycine max RepID=C6ZS29_SOYBN
Glyma0313s50	scaffold_313:11602-13301	5.76074	0.421272	-3.77343	Q64K29 (-)-germacrene D synthase n=1 Tax=Populus trichocarpa x Populus deltoides RepID=Q64K29_9ROSI			Glyma10g29990	Gm10:38688484-38689883	17.3779	71.9604	2.04995	B9DHD7 Vesicle-associated protein 2-2 n=1 Tax=Arabidopsis thaliana RepID=VAP22_ARATH
Glyma04g38850	Gm04:45178223-45182931	4.71792	0.345664	-3.77071	G7JC43 Gibberellin 20 oxidase n=1 Tax=Medicago truncatula RepID=G7JC43_MEDTR			Glyma16g27580	Gm16:31585812-31590822	0.178243	0.738227	2.05022	G7KQ72 Programmed cell death protein n=1 Tax=Medicago truncatula RepID=G7KQ72_MEDTR
Glyma10g39210	Gm10:46937700-46941321	9.72787	0.719755	-3.75655	G7IDN1 Senescence-associated protein SAG102 n=1 Tax=Medicago truncatula RepID=G7IDN1_MEDTR			Glyma05g24770	Gm05:30969794-30977140	3.28505	13.6197	2.05171	Q94F62 BRASSINOSTEROID INSENSITIVE 1-associated receptor kinase 1 n=1 Tax=Arabidopsis thaliana RepID=BAK1_ARATH
Glyma06g16080	Gm06:12616012-12620626	11.2872	0.843764	-3.74171	G7JC43 Gibberellin 20 oxidase n=1 Tax=Medicago truncatula RepID=G7JC43_MEDTR			Glyma10g05320	Gm10:4138561-4147625	3.77433	15.6704	2.05375	G7L0Q2 Phosphatidate phosphatase LPIN3 n=1 Tax=Medicago truncatula RepID=G7L0Q2_MEDTR
Glyma08g12470	Gm08:9151025-9152029	30.4694	2.281	-3.73962	NA			Glyma10g32410	Gm10:40893554-40895977	0.876322	3.63987	2.05435	Q9XIU8 GmMYB29A2 protein n=3 Tax=fabids RepID=Q9XIU8_SOYBN
Glyma02g10605	Gm02:8508758-8511652	1.95646	0.147854	-3.72601	G7I3E6 Lysine-specific demethylase 5C n=1 Tax=Medicago truncatula RepID=G7I3E6_MEDTR			Glyma01g43180	Gm01:54233082-54234282	1.3206	5.48813	2.05512	B9S1V7 GTP binding protein, putative n=1 Tax=Ricinus communis RepID=B9S1V7_RICCO
Glyma09g15150	Gm09:17536844-17543060	1.46182	0.11076	-3.72225	Q84ND5 Cation diffusion facilitator 9 n=1 Tax=Stylosanthes hamata RepID=Q84ND5_STYHA			Glyma13g19460	Gm13:22964372-22966395	2.91318	12.1075	2.05524	G7L0L2 BRI1-KD interacting protein n=1 Tax=Medicago truncatula RepID=G7L0L2_MEDTR
Glyma14g08620	Gm14:6618148-6622838	3.70842	0.283269	-3.71056	G7I588 Myb family transcription factor-like protein n=1 Tax=Medicago truncatula RepID=G7I588_MEDTR			Glyma10g40550	Gm10:47935402-47938787	6.02177	25.0278	2.05528	B9SNB4 Protein phosphatase 2c, putative n=1 Tax=Ricinus communis RepID=B9SNB4_RICCO
Glyma08g17530	Gm08:13016615-13019152	13.7537	1.05711	-3.70163	Q6VM20 Metal transport protein n=1 Tax=Medicago truncatula RepID=Q6VM20_MEDTR			Glyma12g32230	Gm12:35767725-35768772	1.5344	6.37958	2.05579	B9RPQ5 DNA binding protein, putative n=1 Tax=Ricinus communis RepID=B9RPQ5_RICCO
Glyma09g26440	Gm09:32917741-32920727	7.52264	0.579433	-3.69853	NA			Glyma02g31340	Gm02:34139571-34153447	5.64993	23.5047	2.05665	D7LVV0 Exostosin family protein n=1 Tax=Arabidopsis lyrata subsp. lyrata RepID=D7LVV0_ARALL
Glyma15g11800	Gm15:8683262-8693476	18.5357	1.42958	-3.69665	Q94AU9 Chaperonin-like RbcX protein n=1 Tax=Arabidopsis thaliana RepID=Q94AU9_ARATH			Glyma20g01640	Gm20:1159707-1162979	6.59497	27.4377	2.05672	G7JK02 U-box domain-containing protein (Fragment) n=1 Tax=Medicago truncatula RepID=G7JK02_MEDTR
Glyma07g01400	Gm07:896557-898966	26.0486	2.07463	-3.65028	E5D6S8 Acid phosphatase n=1 Tax=Phaseolus vulgaris RepID=E5D6S8_PHAVU			Glyma03g30210	Gm03:38154262-38157731	8.42922	35.0771	2.05706	Q9FG35 Emb|CAB82953.1 n=1 Tax=Arabidopsis thaliana RepID=Q9FG35_ARATH
Glyma01g39981	Gm01:51784287-51787179	4.85994	0.390509	-3.63751	Q6AUY2 Expressed protein n=2 Tax=Oryza sativa Japonica Group RepID=Q6AUY2_ORYSJ			Glyma20g32040	Gm20:40662802-40666056	4.0629	16.9119	2.05746	G7I382 Auxin response factor n=1 Tax=Medicago truncatula RepID=G7I382_MEDTR
Glyma04g07900	Gm04:6166570-6169012	4.6622	0.375754	-3.63315	O24340 Flowering-promoting factor 1 n=1 Tax=Sinapis alba RepID=FPF1_SINAL			Glyma08g08720	Gm08:6221519-6224064	2.0987	8.74913	2.05964	B9S164 WRKY transcription factor, putative n=1 Tax=Ricinus communis RepID=B9S164_RICCO
Glyma18g08720	Gm18:7461540-7462666	3.82405	0.311813	-3.61635	NA			Glyma08g12610	Gm08:9227096-9229806	1.02911	4.29186	2.0602	G7ILU6 U-box domain-containing protein n=1 Tax=Medicago truncatula RepID=G7ILU6_MEDTR
Glyma15g16227	Gm15:12552609-12553485	5.90553	0.483879	-3.60935	NA			Glyma19g39030	Gm19:45846349-45849503	5.65188	23.5899	2.06137	B9SDP1 Gibberellin receptor GID1, putative n=1 Tax=Ricinus communis RepID=B9SDP1_RICCO
Glyma09g36640	Gm09:42328926-42330442	267.119	21.9777	-3.60337	B9R9R0 21 kDa protein, putative n=1 Tax=Ricinus communis RepID=B9R9R0_RICCO			Glyma05g36320	Gm05:40166657-40168158	2.85082	11.9015	2.0617	I1K641 Cytidine deaminase n=1 Tax=Glycine max RepID=I1K641_SOYBN
Glyma15g24010	Gm15:24503356-24506971	45.4704	3.76853	-3.59285	B9T603 Dimethylaniline monooxygenase, putative n=1 Tax=Ricinus communis RepID=B9T603_RICCO			Glyma02g07840	Gm02:6198698-6202475	0.751598	3.13812	2.06187	A2Q5Q4 Glucan endo-1,3-beta-glucosidase n=1 Tax=Medicago truncatula RepID=A2Q5Q4_MEDTR
Glyma17g15310	Gm17:12013618-12015080	5.14447	0.427258	-3.58984	A5JNJ5 Dehydration-responsive element binding protein 6 n=1 Tax=Glycine max RepID=A5JNJ5_SOYBN			Glyma04g08085	Gm04:6337293-6341487	0.28591	1.19443	2.06269	G7J2T6 Cyclic nucleotide-gated channel n=1 Tax=Medicago truncatula RepID=G7J2T6_MEDTR
Glyma02g03210	Gm02:2480546-2482597	21.7225	1.83612	-3.56446	B6CAM2 Matrix metalloproteinase n=1 Tax=Glycine max RepID=B6CAM2_SOYBN			Glyma08g42050	Gm08:41935685-41937360	0.920523	3.84705	2.06323	G7KD30 60S ribosomal protein L18a n=2 Tax=Medicago truncatula RepID=G7KD30_MEDTR
Glyma07g17130	Gm07:16818355-16823225	17.5534	1.49417	-3.55433	B9SPH2 Protein binding protein, putative n=1 Tax=Ricinus communis RepID=B9SPH2_RICCO			Glyma08g15291	Gm08:11084583-11087249	2.53111	10.5884	2.06464	D3YBG4 Bristled-like protein n=1 Tax=Trifolium repens RepID=D3YBG4_TRIRP
Glyma16g29640	Gm16:33391336-33392933	67.6379	5.81986	-3.53878	B6U434 ABC-type Co2+ transport system, permease component n=1 Tax=Zea mays RepID=B6U434_MAIZE			Glyma15g43220	Gm15:50763461-50772414	0.382607	1.60173	2.0657	B9RVL4 Polyamine oxidase, putative n=1 Tax=Ricinus communis RepID=B9RVL4_RICCO
Glyma02g07030	Gm02:5626799-5629640	7.00281	0.607368	-3.52729	B9S8M5 Polyneuridine-aldehyde esterase, putative n=1 Tax=Ricinus communis RepID=B9S8M5_RICCO			Glyma01g33420	Gm01:45530801-45532165	0.986969	4.13906	2.06823	B9RD86 Auxin-induced protein X10A, putative n=1 Tax=Ricinus communis RepID=B9RD86_RICCO
Glyma08g22230	Gm08:16941830-16944033	2.76917	0.24081	-3.52348	O24648 2-oxoglutarate-dependent dioxygenase n=1 Tax=Pisum sativum RepID=O24648_PEA			Glyma04g09380	Gm04:7591579-7595146	4.36107	18.2921	2.06847	B9R6R4 Receptor protein kinase CLAVATA1, putative n=1 Tax=Ricinus communis RepID=B9R6R4_RICCO
Glyma14g03210	Gm14:2060978-2063650	2.75068	0.23945	-3.52199	G7K3C7 ER glycerol-phosphate acyltransferase n=1 Tax=Medicago truncatula RepID=G7K3C7_MEDTR			Glyma01g25890	Gm01:34032831-34039400	6.95551	29.1789	2.0687	G7L5K4 Peptide transporter PTR3-B n=1 Tax=Medicago truncatula RepID=G7L5K4_MEDTR
Glyma15g11980	Gm15:8874940-8877967	23.202	2.0333	-3.51235	B0M195 Peroxisomal short-chain dehydrogenase/reductase family protein n=1 Tax=Glycine max RepID=B0M195_SOYBN			Glyma13g08070	Gm13:8303947-8305763	1.0791	4.52793	2.06902	G7JV62 RING-H2 finger protein ATL1O n=1 Tax=Medicago truncatula RepID=G7JV62_MEDTR
Glyma15g37600	Gm15:43501576-43506927	1.397	0.122814	-3.50779	G7J0K6 Short internodes n=1 Tax=Medicago truncatula RepID=G7J0K6_MEDTR			Glyma19g44190	Gm19:49684990-49691431	10.88	45.6718	2.06962	G7L3Z7 G-box binding factor n=2 Tax=Medicago truncatula RepID=G7L3Z7_MEDTR
Glyma16g08560	Gm16:7947105-7951168	4.24632	0.37333	-3.50769	G7KPN7 Receptor-like protein kinase n=1 Tax=Medicago truncatula RepID=G7KPN7_MEDTR			Glyma12g01450	Gm12:868640-881507	8.58981	36.0657	2.06993	G7JSI6 Nucleotide pyrophosphatase/phosphodiesterase n=1 Tax=Medicago truncatula RepID=G7JSI6_MEDTR
Glyma04g04730	Gm04:3501116-3504221	11.1946	0.985471	-3.50585	D3YBD3 Proteinase inhibitor n=1 Tax=Trifolium repens RepID=D3YBD3_TRIRP			Glyma07g18320	Gm07:18213331-18215145	0.696164	2.92428	2.07058	G7JN34 Zinc finger and SCAN domain-containing protein n=1 Tax=Medicago truncatula RepID=G7JN34_MEDTR
Glyma09g35810	Gm09:41714334-41715409	3.30161	0.290791	-3.50512	B9R9T1 Peroxisomal biogenesis factor, putative n=1 Tax=Ricinus communis RepID=B9R9T1_RICCO			Glyma06g15460	Gm06:12188272-12192290	0.944196	3.96751	2.07107	G7LC96 Auxin-induced protein 5NG4 n=2 Tax=Medicago truncatula RepID=G7LC96_MEDTR
Glyma09g04100	Gm09:2998801-3000116	5.92424	0.522431	-3.50332	B9A9Z2 Nicotianamine synthase n=1 Tax=Lotus japonicus RepID=B9A9Z2_LOTJA			Glyma03g14888	Gm03:19079981-19089860	2.79466	11.7438	2.07116	G7JLX5 TIR-NBS-LRR RCT1-like resistance protein n=1 Tax=Medicago truncatula RepID=G7JLX5_MEDTR
Glyma13g27510	Gm13:30692127-30693533	37.9491	3.36125	-3.49699	E4MY81 mRNA, clone: RTFL01-44-P14 n=1 Tax=Eutrema halophilum RepID=E4MY81_THEHA			Glyma06g42820	Gm06:46120491-46125656	7.5183	31.6694	2.07461	G7JCN5 Trehalose synthase-like protein n=1 Tax=Medicago truncatula RepID=G7JCN5_MEDTR
Glyma09g27490	Gm09:34324792-34326956	2.82572	0.258256	-3.45174	O04280 Gibberellin 20-oxidase n=1 Tax=Phaseolus vulgaris RepID=O04280_PHAVU			Glyma01g06550	Gm01:6797682-6802949	3.79672	16.0023	2.07545	G7JWM9 WRKY transcription factor n=18 Tax=rosids RepID=G7JWM9_MEDTR
Glyma16g06770	Gm16:6096491-6100341	3.28811	0.301045	-3.44921	B9RBN5 Ankyrin repeat-containing protein, putative n=1 Tax=Ricinus communis RepID=B9RBN5_RICCO			Glyma17g10170	Gm17:7596395-7598882	5.64989	23.8311	2.07655	G7JNT1 Two-component response regulator ARR5 n=1 Tax=Medicago truncatula RepID=G7JNT1_MEDTR
Glyma06g25480	Gm06:23354618-23358355	10.5494	0.973815	-3.43736	G7JLT6 Gamma-interferon-inducible lysosomal thiol reductase n=1 Tax=Medicago truncatula RepID=G7JLT6_MEDTR			Glyma02g17400	Gm02:15663856-15675865	20.7984	87.7625	2.07713	G7IF88 Katanin p60 ATPase-containing subunit A-like protein n=1 Tax=Medicago truncatula RepID=G7IF88_MEDTR
Glyma07g34450	Gm07:39377635-39378749	2.10551	0.194454	-3.43667	E9L574 CLE28 protein n=2 Tax=Glycine max RepID=E9L574_SOYBN			Glyma17g03290	Gm17:2180632-2187371	10.4573	44.13	2.07725	B9RTB1 Protein penguin, putative n=1 Tax=Ricinus communis RepID=B9RTB1_RICCO
Glyma10g35040	Gm10:43210651-43213987	3.34714	0.310041	-3.4324	Q8L4Y9 BHLH transcription factor-like protein n=1 Tax=Oryza sativa Japonica Group RepID=Q8L4Y9_ORYSJ			Glyma06g03760	Gm06:2649984-2651889	7.49248	31.6198	2.07731	B9R7P4 Rnf5, putative n=1 Tax=Ricinus communis RepID=B9R7P4_RICCO
Glyma03g30516	Gm03:38463048-38466397	3.78306	0.351574	-3.42765	C1L343 Rop-interacting receptor-like cytoplasmic kinase 2 n=1 Tax=Medicago truncatula RepID=C1L343_MEDTR			Glyma20g24780	Gm20:34430776-34432290	2.30492	9.73117	2.07789	G7ZZC3 Arylacetamide deacetylase n=1 Tax=Medicago truncatula RepID=G7ZZC3_MEDTR
Glyma11g11440	Gm11:8140030-8143443	9.30632	0.870436	-3.4184	Q9ARG2 Amino acid transporter n=1 Tax=Glycine max RepID=Q9ARG2_SOYBN			Glyma13g37230	Gm13:38369516-38375111	5.35104	22.6082	2.07895	G7IRA6 Serine/threonine protein kinase cdk9 n=1 Tax=Medicago truncatula RepID=G7IRA6_MEDTR
Glyma08g45010	Gm08:44461074-44462458	54.9064	5.15203	-3.41376	NA			Glyma15g08370	Gm15:5919154-5920737	0.745416	3.15521	2.08162	B3VHW0 Ethylene-responsive element binding factor 4 n=1 Tax=Glycine max RepID=B3VHW0_SOYBN
Glyma19g44790	Gm19:50110851-50113208	10.8408	1.02819	-3.39829	O48927 Cytochrome P450 78A3 n=1 Tax=Glycine max RepID=C78A3_SOYBN			Glyma01g43420	Gm01:54433421-54435852	0.800298	3.38785	2.08176	A7LHF9 WRKY12 (Fragment) n=1 Tax=Glycine max RepID=A7LHF9_SOYBN
Glyma02g42390	Gm02:47426657-47433069	14.4968	1.37555	-3.39765	A4PBE6 Cytochrome P450 enzyme n=1 Tax=Pisum sativum RepID=A4PBE6_PEA			Glyma01g37020	Gm01:49402192-49404630	18.8554	79.8721	2.08272	G7JWA0 Thaumatin-like protein n=1 Tax=Medicago truncatula RepID=G7JWA0_MEDTR
Glyma15g08960	Gm15:6362875-6367149	6.01998	0.572663	-3.394	Q9LP52 F28N24.8 protein n=2 Tax=Arabidopsis thaliana RepID=Q9LP52_ARATH			Glyma04g04230	Gm04:3149521-3151093	1.11018	4.70353	2.08295	Q00M84 N-hydroxycinnamoyl/benzoyltransferase 6 n=1 Tax=Glycine max RepID=Q00M84_SOYBN
Glyma06g42340	Gm06:45579717-45585658	3.36397	0.320797	-3.39043	B9IN02 Sodium transporter hkt1-like protein n=1 Tax=Populus trichocarpa RepID=B9IN02_POPTR			Glyma03g33670	Gm03:41169553-41178220	6.42736	27.2386	2.08336	Q40221 Protein containing C-terminal RING-finger n=1 Tax=Lotus japonicus RepID=Q40221_LOTJA
Glyma13g30463	Gm13:33098063-33102062	23.0411	2.1984	-3.38969	G7IKA5 GDSL esterase/lipase n=1 Tax=Medicago truncatula RepID=G7IKA5_MEDTR			Glyma17g07580	Gm17:5581150-5583561	1.62898	6.90382	2.08343	G7JEB1 RING finger-like protein n=1 Tax=Medicago truncatula RepID=G7JEB1_MEDTR
Glyma15g42570	Gm15:50003132-50006494	4.31697	0.413733	-3.38325	G7IZC8 Beta-glucosidase n=1 Tax=Medicago truncatula RepID=G7IZC8_MEDTR			Glyma17g15200	Gm17:11896942-11901072	5.02909	21.3145	2.08347	Q7XC71 Expressed protein n=1 Tax=Oryza sativa Japonica Group RepID=Q7XC71_ORYSJ
Glyma08g24070	Gm08:18297444-18300014	12.5294	1.20581	-3.37725	B9RHU3 Mitochondrial deoxynucleotide carrier, putative n=1 Tax=Ricinus communis RepID=B9RHU3_RICCO			Glyma17g38120	Gm17:41792748-41801329	19.1154	81.0726	2.08448	B9R8I7 Multicopper oxidase, putative n=1 Tax=Ricinus communis RepID=B9R8I7_RICCO
Glyma02g00240	Gm02:27189-28522	6.61236	0.638753	-3.37184	Q9FG89 NAD(P)H dehydrogenase 18 n=1 Tax=Arabidopsis thaliana RepID=Q9FG89_ARATH			Glyma19g01910	Gm19:1548067-1549890	0.523259	2.21983	2.08485	G7KJH6 Glycosyltransferase CAZy family GT8 n=1 Tax=Medicago truncatula RepID=G7KJH6_MEDTR
Glyma14g06660	Gm14:4877167-4879853	5.92304	0.576297	-3.36145	D7LNA2 Binding protein n=1 Tax=Arabidopsis lyrata subsp. lyrata RepID=D7LNA2_ARALL			Glyma18g09980	Gm18:8799042-8801825	1.97103	8.36542	2.08548	C6ZS21 Disease resistance protein n=1 Tax=Glycine max RepID=C6ZS21_SOYBN
Glyma19g41090	Gm19:47403187-47408256	12.0523	1.1811	-3.3511	Q0PKY2 Endo-1,4-beta-mannanase n=1 Tax=Glycine max RepID=Q0PKY2_SOYBN			Glyma01g03005	Gm01:2495435-2497366	0.676109	2.87581	2.08864	G7IXC7 WRKY transcription factor n=1 Tax=Medicago truncatula RepID=G7IXC7_MEDTR
Glyma12g04880	Gm12:3233267-3236391	1.4222	0.14017	-3.34287	G7J6I5 BURP domain-containing protein n=1 Tax=Medicago truncatula RepID=G7J6I5_MEDTR			Glyma04g12340	Gm04:11357696-11359915	6.3539	27.0288	2.08878	A9TZJ4 VAMP-like protein n=1 Tax=Physcomitrella patens subsp. patens RepID=A9TZJ4_PHYPA
Glyma09g04650	Gm09:3473918-3474542	9.8928	0.980636	-3.33459	NA			Glyma13g35941	Gm13:37318313-37323148	4.38796	18.6772	2.08966	G7IJB8 F-box family protein n=1 Tax=Medicago truncatula RepID=G7IJB8_MEDTR
Glyma05g23860	Gm05:29694903-29697445	15.4071	1.53009	-3.33191	G7JGI1 Pentatricopeptide repeat-containing protein n=1 Tax=Medicago truncatula RepID=G7JGI1_MEDTR			Glyma13g02231	Gm13:2082501-2083270	1.79184	7.62851	2.08996	NA
Glyma09g16972	Gm09:20676909-20679271	6.11672	0.609243	-3.32767	B9SXJ7 ATP binding protein, putative n=1 Tax=Ricinus communis RepID=B9SXJ7_RICCO			Glyma07g02180	Gm07:1509270-1517343	16.6837	71.0594	2.09058	H9A1W2 Acyl-activating enzyme 10 n=1 Tax=Cannabis sativa RepID=H9A1W2_CANSA
Glyma09g07110	Gm09:5975856-5978513	7.25495	0.726656	-3.31962	A2Q567 Amine oxidase n=1 Tax=Medicago truncatula RepID=A2Q567_MEDTR			Glyma13g33501	Gm13:35317871-35318953	11.2457	47.9045	2.09079	NA
Glyma08g23820	Gm08:18149984-18153826	7.85514	0.791116	-3.31168	G7JVL1 Xyloglucan glycosyltransferase n=1 Tax=Medicago truncatula RepID=G7JVL1_MEDTR			Glyma13g37621	Gm13:38662896-38663832	2.05094	8.73984	2.09132	NA
Glyma20g28035	Gm20:37003097-37004725	5.15486	0.524741	-3.29625	NA			Glyma06g15940	Gm06:12518452-12522784	2.56653	10.9514	2.09323	G7JBL3 Germin-like protein n=1 Tax=Medicago truncatula RepID=G7JBL3_MEDTR
Glyma13g43410	Gm13:43109278-43110744	4.10164	0.422308	-3.27983	B9RQL2 Cytoplasmic dynein light chain, putative n=1 Tax=Ricinus communis RepID=B9RQL2_RICCO			Glyma15g12240	Gm15:9051389-9054347	9.55728	40.7822	2.09327	G7IP86 Auxin-induced in root cultures protein n=1 Tax=Medicago truncatula RepID=G7IP86_MEDTR
Glyma16g34700	Gm16:37281760-37284950	2.41146	0.248688	-3.2775	B9T0N4 Acid phosphatase 1, putative n=1 Tax=Ricinus communis RepID=B9T0N4_RICCO			Glyma10g39730	Gm10:47362188-47366520	3.47016	14.812	2.09369	F4IVV0 ROP-interactive CRIB motif-containing protein 1 n=1 Tax=Arabidopsis thaliana RepID=F4IVV0_ARATH
Glyma12g35125	Gm12:38279830-38289562	1.39527	0.14556	-3.26085	Q7XSK0 Beta-glucosidase 18 n=4 Tax=Oryza sativa RepID=BGL18_ORYSJ			Glyma13g31330	Gm13:33774663-33777092	9.1892	39.2576	2.09496	B9RZ87 Rnf5, putative n=1 Tax=Ricinus communis RepID=B9RZ87_RICCO
Glyma15g05940	Gm15:4225803-4228831	5.64555	0.592253	-3.25283	G7IPJ2 Metacaspase-1 n=1 Tax=Medicago truncatula RepID=G7IPJ2_MEDTR			Glyma09g00820	Gm09:442504-444996	7.48276	31.9721	2.09517	A7LHG6 WRKY23 (Fragment) n=1 Tax=Glycine max RepID=A7LHG6_SOYBN
Glyma01g21620	Gm01:26918441-26921225	1.47902	0.155975	-3.24525	D2DW77 UDP-glucosyl transferase n=1 Tax=Phaseolus vulgaris RepID=D2DW77_PHAVU			Glyma06g15411	Gm06:12155838-12158871	2.84091	12.145	2.09594	G7JAV5 Citrate binding protein n=1 Tax=Medicago truncatula RepID=G7JAV5_MEDTR
Glyma01g39120	Gm01:51105888-51110702	27.9801	2.95202	-3.24463	Q8RY64 AT4g37080/C7A10_280 n=2 Tax=Arabidopsis thaliana RepID=Q8RY64_ARATH			Glyma20g39370	Gm20:46697982-46703271	4.75793	20.3438	2.09618	C6ZRR7 Serine/threonine protein kinase n=1 Tax=Glycine max RepID=C6ZRR7_SOYBN
Glyma04g00741	Gm04:413709-415034	36.1189	3.82668	-3.23859	NA			Glyma18g09140	Gm18:7972557-7976185	0.961213	4.11179	2.09684	C6ZS21 Disease resistance protein n=1 Tax=Glycine max RepID=C6ZS21_SOYBN
Glyma13g09460	Gm13:10887028-10890696	1.85326	0.197391	-3.23094	Q4JH25 GA 20-oxidase n=1 Tax=Sesbania rostrata RepID=Q4JH25_SESRO			Glyma04g02300	Gm04:1588820-1593552	3.19988	13.6901	2.09705	G7J5W0 Prolyl 4-hydroxylase alpha-2 subunit n=2 Tax=Medicago truncatula RepID=G7J5W0_MEDTR
Glyma18g51470	Gm18:60346020-60346594	11.9583	1.27797	-3.22608	NA			Glyma20g34590	Gm20:42969456-42974544	6.94811	29.7437	2.09789	I1NI31 Serine/threonine-protein phosphatase n=1 Tax=Glycine max RepID=I1NI31_SOYBN
Glyma03g33020	Gm03:40713874-40716933	22.9404	2.45796	-3.22236	G7L0M3 Auxin-induced protein 5NG4 n=1 Tax=Medicago truncatula RepID=G7L0M3_MEDTR			Glyma05g08950	Gm05:8806065-8810908	3.56423	15.2622	2.0983	B2ZF65 Raffionse synthase 3 n=3 Tax=Glycine max RepID=B2ZF65_SOYBN
Glyma20g28500	Gm20:37438451-37441917	14.356	1.54658	-3.2145	Q9LJ91 Gb|AAD31369.1 n=2 Tax=Arabidopsis thaliana RepID=Q9LJ91_ARATH			Glyma10g05990	Gm10:4714644-4717345	1.74181	7.45858	2.09832	B9S0M3 ATP binding protein, putative n=1 Tax=Ricinus communis RepID=B9S0M3_RICCO
Glyma09g04660	Gm09:3490733-3492582	26.6209	2.88519	-3.20582	NA			Glyma13g34100	Gm13:35755178-35768170	10.017	42.9034	2.09864	G7KH23 Cysteine-rich receptor-like protein kinase n=1 Tax=Medicago truncatula RepID=G7KH23_MEDTR
Glyma16g24740	Gm16:28715327-28720814	11.6533	1.26426	-3.20437	B5A7G5 Salicylic acid methyl transferase-like protein n=1 Tax=Glycine max RepID=B5A7G5_SOYBN			Glyma08g45590	Gm08:44915334-44916428	8.37661	35.8778	2.09865	Q9XIS8 Trypsin inhibitor p20 n=1 Tax=Glycine max RepID=Q9XIS8_SOYBN
Glyma11g32520	Gm11:34199605-34203430	40.2857	4.37341	-3.20344	G7J7V5 Cysteine-rich receptor-like protein kinase n=1 Tax=Medicago truncatula RepID=G7J7V5_MEDTR			Glyma04g05530	Gm04:4194860-4199682	3.88286	16.6385	2.09933	G7J7P6 Mitochondrial substrate carrier family protein B n=1 Tax=Medicago truncatula RepID=G7J7P6_MEDTR
Glyma02g15290	Gm02:13790013-13793024	3.65518	0.400695	-3.18937	B9S775 Peroxidase 10, putative n=1 Tax=Ricinus communis RepID=B9S775_RICCO			Glyma15g14020	Gm15:10584246-10586291	1.53151	6.57592	2.10223	G7IML7 Reticuline oxidase-like protein n=1 Tax=Medicago truncatula RepID=G7IML7_MEDTR
Glyma09g38250	Gm09:43645737-43647177	10.0941	1.10726	-3.18844	G7LCK7 Transcription factor bHLH25 n=1 Tax=Medicago truncatula RepID=G7LCK7_MEDTR			Glyma14g09970	Gm14:8033819-8034702	1.47569	6.33704	2.10241	Q75KB0 Expressed protein n=1 Tax=Oryza sativa Japonica Group RepID=Q75KB0_ORYSJ
Glyma02g47570	Gm02:51110125-51111203	7.28289	0.799192	-3.1879	NA			Glyma15g01850	Gm15:1217152-1218419	1.84547	7.93052	2.10343	G7JJE1 ATP-dependent RNA helicase chl1 n=1 Tax=Medicago truncatula RepID=G7JJE1_MEDTR
Glyma10g01690	Gm10:1227791-1229419	92.8668	10.2048	-3.18591	G7IDR7 Universal stress protein A-like protein n=1 Tax=Medicago truncatula RepID=G7IDR7_MEDTR			Glyma18g16710	Gm18:17343034-17344818	18.0569	77.6405	2.10426	I1N197 Thioredoxin n=1 Tax=Glycine max RepID=I1N197_SOYBN
Glyma07g35620	Gm07:40924570-40926845	20.2099	2.23483	-3.17683	Q8L5G4 Alpha-expansin 4 n=1 Tax=Cicer arietinum RepID=Q8L5G4_CICAR			Glyma08g18990	Gm08:14334877-14342488	2.00324	8.61522	2.10455	G7J9Z8 2-nitropropane dioxygenase-like protein n=1 Tax=Medicago truncatula RepID=G7J9Z8_MEDTR
Glyma01g01790	Gm01:1357260-1362758	5.60268	0.622217	-3.17063	G7KCB2 Abhydrolase domain-containing protein FAM108C1 n=1 Tax=Medicago truncatula RepID=G7KCB2_MEDTR			Glyma04g43110	Gm04:48736580-48741833	0.511479	2.20075	2.10525	G7J3J9 CrcB-like protein n=1 Tax=Medicago truncatula RepID=G7J3J9_MEDTR
Glyma12g12840	Gm12:11192792-11193288	12.3141	1.36953	-3.16856	NA			Glyma16g19190	Gm16:21103419-21104995	3.95343	17.0237	2.10637	B9RLA1 Calmodulin, putative n=1 Tax=Ricinus communis RepID=B9RLA1_RICCO
Glyma12g29980	Gm12:33450849-33452781	9.07668	1.01143	-3.16576	NA			Glyma13g07910	Gm13:8140962-8153289	11.7039	50.4016	2.10648	G7JCQ3 White-brown-complex ABC transporter family n=1 Tax=Medicago truncatula RepID=G7JCQ3_MEDTR
Glyma01g38880	Gm01:50879358-50885115	1.13846	0.126905	-3.16526	O48925 CYP82C1p n=1 Tax=Glycine max RepID=O48925_SOYBN			Glyma20g21600	Gm20:30943712-30947809	3.5447	15.2936	2.10919	NA
Glyma09g24943	Gm09:30979358-30987003	7.44172	0.831851	-3.16124	Q1RU51 Transporter, putative n=1 Tax=Medicago truncatula RepID=Q1RU51_MEDTR			Glyma19g44310	Gm19:49775281-49780336	11.2595	48.586	2.1094	G7L419 GH3 family protein n=1 Tax=Medicago truncatula RepID=G7L419_MEDTR
Glyma09g35210	Gm09:41407018-41415574	14.9801	1.67514	-3.16069	G7K421 GMC-type oxidoreductase, putative n=1 Tax=Medicago truncatula RepID=G7K421_MEDTR			Glyma15g04080	Gm15:2862194-2864052	1.57135	6.78457	2.11025	G7JCE1 RING finger protein n=1 Tax=Medicago truncatula RepID=G7JCE1_MEDTR
Glyma14g08970	Gm14:6971484-6973117	4.4624	0.499369	-3.15964	NA			Glyma04g04500	Gm04:3366552-3369274	1.21467	5.24469	2.11029	G7J708 Cysteine-rich receptor-like protein kinase n=1 Tax=Medicago truncatula RepID=G7J708_MEDTR
Glyma18g41833	Gm18:50805580-50808158	10.416	1.17315	-3.15034	B9SPH2 Protein binding protein, putative n=1 Tax=Ricinus communis RepID=B9SPH2_RICCO			Glyma04g12480	Gm04:11558236-11560743	28.716	124.062	2.11114	Q9ZWN0 GPI-anchored protein n=1 Tax=Vigna radiata RepID=Q9ZWN0_VIGRA
Glyma01g03880	Gm01:3348917-3352335	8.12582	0.916063	-3.149	F4I5D7 NHL domain-containing protein n=2 Tax=Arabidopsis thaliana RepID=F4I5D7_ARATH			Glyma06g46420	Gm06:49042373-49045957	1.52181	6.57488	2.11118	B9SFR9 WRKY transcription factor, putative n=2 Tax=rosids RepID=B9SFR9_RICCO
Glyma05g32810	Gm05:37619634-37624472	3.56153	0.401559	-3.14881	G7LEY2 Amino acid permease n=1 Tax=Medicago truncatula RepID=G7LEY2_MEDTR			Glyma12g08915	Gm12:6664577-6674353	0.15703	0.678598	2.11151	F8RNW6 Phospholipid:diacylglycerol acyltransferase n=1 Tax=Ricinus communis RepID=F8RNW6_RICCO
Glyma06g14150	Gm06:11156032-11161042	47.4878	5.35985	-3.14729	G7J905 Two-component response regulator-like PRR73 n=2 Tax=Medicago truncatula RepID=G7J905_MEDTR			Glyma03g32670	Gm03:40433364-40435698	0.41036	1.77351	2.11165	B9S595 Monooxygenase, putative n=1 Tax=Ricinus communis RepID=B9S595_RICCO
Glyma01g35160	Gm01:47703725-47705225	9.4413	1.06653	-3.14606	G7K6V9 Histone-lysine N-methyltransferase ASHR2 n=1 Tax=Medicago truncatula RepID=G7K6V9_MEDTR			Glyma18g03510	Gm18:2372746-2376211	9.86101	42.633	2.11216	G7JAM9 Solute carrier family 35 member E4 n=1 Tax=Medicago truncatula RepID=G7JAM9_MEDTR
Glyma13g25890	Gm13:29112074-29116322	10.6268	1.20209	-3.14409	G7LID0 Auxin-induced protein 5NG4 n=2 Tax=Medicago truncatula RepID=G7LID0_MEDTR			Glyma13g00350	Gm13:94060-96414	1.3579	5.87645	2.11357	O64568 Expressed protein n=1 Tax=Arabidopsis thaliana RepID=O64568_ARATH
Glyma15g04340	Gm15:3037011-3039131	9.85896	1.11758	-3.14106	Q9SNC4 ENTH/VHS family protein n=1 Tax=Arabidopsis thaliana RepID=Q9SNC4_ARATH			Glyma11g03720	Gm11:2489973-2493155	2.48019	10.735	2.11379	Q7XC71 Expressed protein n=1 Tax=Oryza sativa Japonica Group RepID=Q7XC71_ORYSJ
Glyma19g34060	Gm19:41673761-41676264	3.8507	0.437264	-3.13854	G7IDN1 Senescence-associated protein SAG102 n=1 Tax=Medicago truncatula RepID=G7IDN1_MEDTR			Glyma13g30720	Gm13:33247689-33248688	6.97039	30.1723	2.11391	G7IFJ0 Ethylene-responsive transcription factor n=1 Tax=Medicago truncatula RepID=G7IFJ0_MEDTR
Glyma12g05060	Gm12:3373361-3378791	2.32612	0.266475	-3.12585	B9S8S3 Electron transporter, putative n=1 Tax=Ricinus communis RepID=B9S8S3_RICCO			Glyma01g07930	Gm01:8874759-8878203	24.8128	107.472	2.1148	O04300 Alpha-1,4-glucan-protein synthase [UDP-forming] n=1 Tax=Pisum sativum RepID=UPTG_PEA
Glyma08g44110	Gm08:43839148-43842613	2.26786	0.260534	-3.12179	NA			Glyma20g24500	Gm20:34160318-34162559	15.7637	68.2883	2.11504	B9RPT1 Ferredoxin-3, chloroplast, putative n=1 Tax=Ricinus communis RepID=B9RPT1_RICCO
Glyma10g05770	Gm10:4510907-4512690	5.0374	0.578841	-3.12144	Q9LYX4 Arabidopsis thaliana genomic DNA, chromosome 5, P1 clone:MOK16 n=1 Tax=Arabidopsis thaliana RepID=Q9LYX4_ARATH			Glyma12g06910	Gm12:4706698-4709528	54.7108	237.017	2.11509	Q5QHT4 70 kDa heat shock cognate protein 1 n=1 Tax=Vigna radiata RepID=Q5QHT4_VIGRA
Glyma15g36110	Gm15:41103134-41106746	6.48193	0.750181	-3.11111	G7LIF2 S-locus lectin protein kinase family protein n=1 Tax=Medicago truncatula RepID=G7LIF2_MEDTR			Glyma17g04310	Gm17:2882120-2890411	0.561567	2.43675	2.11743	B9RZY1 Calmodulin-binding transcription activator (Camta), plants, putative n=1 Tax=Ricinus communis RepID=B9RZY1_RICCO
Glyma17g09401	Gm17:6937457-6944430	1.34273	0.156617	-3.09985	G7J4U4 Alliin lyase n=1 Tax=Medicago truncatula RepID=G7J4U4_MEDTR			Glyma17g36050	Gm17:40033722-40040366	17.0061	73.8992	2.11951	G7I3J4 Serine/threonine protein kinase 38-like protein n=1 Tax=Medicago truncatula RepID=G7I3J4_MEDTR
Glyma13g26730	Gm13:29927998-29933529	3.95994	0.46195	-3.09967	G7J0K6 Short internodes n=1 Tax=Medicago truncatula RepID=G7J0K6_MEDTR			Glyma13g10640	Gm13:12608652-12611248	25.5756	111.25	2.12096	Q5JZR1 N-rich protein n=1 Tax=Glycine max RepID=Q5JZR1_SOYBN
Glyma15g18441	Gm15:15195356-15198841	11.1246	1.30363	-3.09315	A2Q567 Amine oxidase n=1 Tax=Medicago truncatula RepID=A2Q567_MEDTR			Glyma03g42140	Gm03:47422430-47424595	5.62323	24.4816	2.12223	I1JS32 3-ketoacyl-CoA synthase n=1 Tax=Glycine max RepID=I1JS32_SOYBN
Glyma15g16190	Gm15:12522905-12523741	24.6967	2.90255	-3.08893	NA			Glyma06g16340	Gm06:12825312-12832063	17.4717	76.0833	2.12256	A7XVK0 Amino acid transporter n=1 Tax=Phaseolus vulgaris RepID=A7XVK0_PHAVU
Glyma11g18890	Gm11:15489927-15490656	12.2149	1.43921	-3.0853	Q2QXI9 Expressed protein n=2 Tax=Oryza sativa RepID=Q2QXI9_ORYSJ			Glyma01g12840	Gm01:15948220-15953470	1.26122	5.49706	2.12385	D2E850 Granule-bound starch synthase (Fragment) n=1 Tax=Triphysaria eriantha RepID=D2E850_9LAMI
Glyma09g42020	Gm09:46686605-46691121	28.674	3.38832	-3.0811	G7IBD4 Chaperone protein dnaJ n=1 Tax=Medicago truncatula RepID=G7IBD4_MEDTR			Glyma08g41020	Gm08:41038625-41042348	8.51425	37.1221	2.12433	G7KCH5 F-box/kelch-repeat protein SKIP11 n=1 Tax=Medicago truncatula RepID=G7KCH5_MEDTR
Glyma06g04110	Gm06:2863460-2864387	18.1467	2.14978	-3.07744	NA			Glyma01g38530	Gm01:50601604-50607434	0.382272	1.66793	2.12538	G7KAU2 Membrane protein, putative n=1 Tax=Medicago truncatula RepID=G7KAU2_MEDTR
Glyma04g43000	Gm04:48629345-48634632	16.9799	2.01927	-3.07193	G7J316 Auxin-induced protein 5NG4 n=2 Tax=Medicago truncatula RepID=G7J316_MEDTR			Glyma20g27190	Gm20:36408848-36410287	1.46514	6.40249	2.1276	NA
Glyma17g10910	Gm17:8199742-8200917	14.3754	1.70994	-3.07158	NA			Glyma06g05570	Gm06:3984250-3989036	4.6013	20.1097	2.12778	NA
Glyma17g15220	Gm17:11912121-11914262	4.08623	0.486225	-3.07107	G7JIU8 Inositol 2-dehydrogenase n=1 Tax=Medicago truncatula RepID=G7JIU8_MEDTR			Glyma19g00700	Gm19:436212-438748	0.713965	3.12065	2.12792	B9RSP8 Gamma-glutamyl-gamma-aminobutyrate hydrolase, putative n=1 Tax=Ricinus communis RepID=B9RSP8_RICCO
Glyma08g19000	Gm08:14346027-14348398	54.441	6.48648	-3.06919	G7KLV5 Cytokinin-O-glucosyltransferase n=1 Tax=Medicago truncatula RepID=G7KLV5_MEDTR			Glyma03g08250	Gm03:9107124-9110810	1.77172	7.74728	2.12854	G7JN27 RING finger protein n=1 Tax=Medicago truncatula RepID=G7JN27_MEDTR
Glyma17g36110	Gm17:40121679-40122858	21.0803	2.51271	-3.06858	G7I3M0 Calfumirin-1 n=1 Tax=Medicago truncatula RepID=G7I3M0_MEDTR			Glyma11g04113	Gm11:2742084-2750338	2.76471	12.0925	2.12891	G7JYL5 DNA repair endonuclease UVH1 n=1 Tax=Medicago truncatula RepID=G7JYL5_MEDTR
Glyma13g07475	Gm13:7593773-7596176	1.12326	0.13479	-3.05891	Q84N90 LEGCYC1B n=1 Tax=Cadia purpurea RepID=Q84N90_9FABA			Glyma11g12980	Gm11:9275327-9276819	3.64337	15.9394	2.12926	Q42785 Nonsymbiotic hemoglobin n=3 Tax=Glycine max RepID=Q42785_SOYBN
Glyma09g17260	Gm09:21136798-21137392	12.6908	1.52362	-3.05821	NA			Glyma15g12780	Gm15:9449577-9453739	32.427	141.871	2.12932	D7NM49 Farnesyl-diphosphate synthase n=1 Tax=Glycyrrhiza uralensis RepID=D7NM49_GLYUR
Glyma05g38260	Gm05:41641383-41645154	30.156	3.62589	-3.05604	B9RAB9 Corticosteroid 11-beta-dehydrogenase, putative n=1 Tax=Ricinus communis RepID=B9RAB9_RICCO			Glyma13g00840	Gm13:539417-548480	4.90984	21.4906	2.12996	Q9SAW3 P-type H+-ATPase n=1 Tax=Vicia faba RepID=Q9SAW3_VICFA
Glyma17g16570	Gm17:13308740-13311286	24.1012	2.90425	-3.05287	G7JGG8 Leucine-rich repeat-containing protein n=1 Tax=Medicago truncatula RepID=G7JGG8_MEDTR			Glyma17g35480	Gm17:39464347-39468437	0.895862	3.92673	2.13198	E2IFU9 Acyl-CoA-binding protein n=1 Tax=Vitis vinifera RepID=E2IFU9_VITVI
Glyma20g01850	Gm20:1404801-1406034	6.93181	0.83617	-3.05136	G7KEM3 Serine carboxypeptidase-like protein n=1 Tax=Medicago truncatula RepID=G7KEM3_MEDTR			Glyma16g01500	Gm16:1083154-1086925	79.9199	350.368	2.13224	Q7XAU4 Ethylene responsive protein n=1 Tax=Glycine max RepID=Q7XAU4_SOYBN
Glyma10g00630	Gm10:386682-389158	2.0228	0.244035	-3.0512	B9RTL0 Calmodulin binding protein, putative n=1 Tax=Ricinus communis RepID=B9RTL0_RICCO			Glyma19g19680	Gm19:23899321-23902233	53.2144	233.338	2.13253	P17928 Calmodulin n=7 Tax=Magnoliophyta RepID=CALM_MEDSA
Glyma09g04500	Gm09:3316705-3319908	1.12292	0.135486	-3.05105	Q9FJ18 Gb|AAF31026.1 n=1 Tax=Arabidopsis thaliana RepID=Q9FJ18_ARATH			Glyma03g32850	Gm03:40584884-40588047	247.484	1085.75	2.13328	Q5QHT2 70 kDa heat shock cognate protein 3 n=1 Tax=Vigna radiata RepID=Q5QHT2_VIGRA
Glyma14g08230	Gm14:6255630-6257564	40.914	4.9441	-3.04882	Q9FYX2 BAC19.4 n=1 Tax=Solanum lycopersicum RepID=Q9FYX2_SOLLC			Glyma08g48230	Gm08:46895306-46896444	1.174	5.15491	2.13451	G7KUB7 Zinc finger protein n=1 Tax=Medicago truncatula RepID=G7KUB7_MEDTR
Glyma13g43920	Gm13:43466821-43470611	14.1102	1.71219	-3.04282	B9GWP1 ATP/ADP transporter n=1 Tax=Populus trichocarpa RepID=B9GWP1_POPTR			Glyma02g01600	Gm02:1131638-1133001	31.5034	138.38	2.13505	Q0GPH6 BZIP transcription factor bZIP60 n=1 Tax=Glycine max RepID=Q0GPH6_SOYBN
Glyma05g38410	Gm05:41774284-41778456	21.7366	2.64204	-3.0404	B9RA95 DNA binding protein, putative n=1 Tax=Ricinus communis RepID=B9RA95_RICCO			Glyma11g35362	Gm11:37018858-37020937	0.343779	1.51105	2.136	G7JBB1 Serine/threonine protein kinase-like protein CCR4 n=1 Tax=Medicago truncatula RepID=G7JBB1_MEDTR
Glyma04g38691	Gm04:45056620-45066823	45.029	5.48063	-3.03844	D2DF32 PAD4 n=1 Tax=Glycine max RepID=D2DF32_SOYBN			Glyma13g27990	Gm13:31098263-31099022	0.832659	3.66082	2.13637	Q5GFS0 Isopentenyl transferase n=1 Tax=Glycine max RepID=Q5GFS0_SOYBN
Glyma18g05501	Gm18:4160023-4161116	9.33319	1.13601	-3.0384	Q9STG6 Deoxyuridine 5'-triphosphate nucleotidohydrolase n=2 Tax=Arabidopsis thaliana RepID=DUT_ARATH			Glyma10g33110	Gm10:41482190-41485704	9.08794	39.9861	2.13747	B9STH5 Electron transfer flavoprotein beta-subunit, putative n=1 Tax=Ricinus communis RepID=B9STH5_RICCO
Glyma17g04050	Gm17:2673888-2675276	3.63695	0.444065	-3.03389	G7JP02 Pectinesterase inhibitor n=1 Tax=Medicago truncatula RepID=G7JP02_MEDTR			Glyma11g14950	Gm11:10696043-10699039	72.8714	320.816	2.13832	Q5QHT4 70 kDa heat shock cognate protein 1 n=1 Tax=Vigna radiata RepID=Q5QHT4_VIGRA
Glyma17g34900	Gm17:38877494-38884064	406.908	49.7708	-3.03133	Q9AUD9 Asparaginyl endopeptidase n=1 Tax=Vigna radiata var. radiata RepID=Q9AUD9_VIGRR			Glyma11g31234	Gm11:32306771-32315445	4.23522	18.6479	2.1385	B9SD76 Transcription factor, putative n=1 Tax=Ricinus communis RepID=B9SD76_RICCO
Glyma09g29991	Gm09:36863141-36865466	3.21736	0.394792	-3.02671	G7JL30 NAD(P)H-dependent 6'-deoxychalcone synthase n=1 Tax=Medicago truncatula RepID=G7JL30_MEDTR			Glyma10g26740	Gm10:35190721-35191829	1.97256	8.69302	2.13979	G7KV73 Non-specific lipid-transfer protein n=1 Tax=Medicago truncatula RepID=G7KV73_MEDTR
Glyma15g11270	Gm15:8260563-8263946	75.9808	9.35611	-3.02165	B9RXP8 Glucose-6-phosphate/phosphate translocator 2, chloroplast, putative n=1 Tax=Ricinus communis RepID=B9RXP8_RICCO			Glyma09g32080	Gm09:38634105-38635901	14.4759	63.8966	2.14209	Q9LHF1 Leucine-rich repeat extensin-like protein 4 n=1 Tax=Arabidopsis thaliana RepID=LRX4_ARATH
Glyma12g13020	Gm12:11383848-11388057	31.8733	3.92611	-3.02118	G7JTU9 O-acyltransferase WSD1 n=1 Tax=Medicago truncatula RepID=G7JTU9_MEDTR			Glyma12g17960	Gm12:18495937-18500873	4.47239	19.7414	2.14211	Q2V3V8 AT3G14870 protein n=1 Tax=Arabidopsis thaliana RepID=Q2V3V8_ARATH
Glyma17g11151	Gm17:8373534-8375944	2.13778	0.264874	-3.01273	NA			Glyma06g08930	Gm06:6510346-6512362	1.41853	6.26164	2.14214	B9RS17 Ring finger protein, putative n=1 Tax=Ricinus communis RepID=B9RS17_RICCO
Glyma19g33951	Gm19:41563349-41574632	2.37985	0.295005	-3.01206	O04408 Ent-copalyl diphosphate synthase, chloroplastic n=1 Tax=Pisum sativum RepID=KSA_PEA			Glyma10g39910	Gm10:47478954-47482405	0.272054	1.20152	2.1429	G8A0W3 Cysteine-rich receptor-like protein kinase n=2 Tax=Medicago truncatula RepID=G8A0W3_MEDTR
Glyma17g16481	Gm17:13181946-13184478	15.1257	1.87883	-3.00909	G7JGI1 Pentatricopeptide repeat-containing protein n=1 Tax=Medicago truncatula RepID=G7JGI1_MEDTR			Glyma08g48120	Gm08:46821814-46826085	11.2917	49.8733	2.14301	I1KZL9 Mannose-6-phosphate isomerase n=1 Tax=Glycine max RepID=I1KZL9_SOYBN
Glyma07g08400	Gm07:7010998-7018996	26.4227	3.28533	-3.00767	A2Q5C6 Generic methyltransferase n=1 Tax=Medicago truncatula RepID=A2Q5C6_MEDTR			Glyma05g35721	Gm05:39702372-39704589	1.60842	7.10449	2.14309	G7L853 CRS2-associated factor n=1 Tax=Medicago truncatula RepID=G7L853_MEDTR
Glyma13g07735	Gm13:7910921-7927243	5.51407	0.685687	-3.00749	B9S0I7 Phosphoglycerate kinase n=1 Tax=Ricinus communis RepID=B9S0I7_RICCO			Glyma08g10153	Gm08:7315139-7317304	30.3524	134.115	2.14359	Q2HTL2 Senescence-associated protein, putative n=1 Tax=Medicago truncatula RepID=Q2HTL2_MEDTR
Glyma08g02375	Gm08:1641766-1644551	3.87163	0.481684	-3.00678	B6THR2 Peptidase C45, acyl-coenzyme A/6-aminopenicillanic acid acyl-transferase n=1 Tax=Zea mays RepID=B6THR2_MAIZE			Glyma18g03190	Gm18:2111977-2114180	4.76976	21.0774	2.14371	B9T866 Hydrolase, putative n=1 Tax=Ricinus communis RepID=B9T866_RICCO
Glyma19g37360	Gm19:44536728-44539967	1.75206	0.218144	-3.0057	Q75GI8 Expressed protein n=1 Tax=Oryza sativa Japonica Group RepID=Q75GI8_ORYSJ			Glyma02g16365	Gm02:14774918-14783173	13.9269	61.5694	2.14434	G7IDK9 Sulfate/bicarbonate/oxalate exchanger and transporter sat-1 n=1 Tax=Medicago truncatula RepID=G7IDK9_MEDTR
Glyma20g21376	Gm20:30637227-30642293	1.34647	0.168	-3.00265	B0F827 Zinc finger-like protein n=1 Tax=Cucumis sativus RepID=B0F827_CUCSA			Glyma04g07080	Gm04:5500983-5504660	1.16654	5.16226	2.14576	G7JB13 Kinase-like protein n=1 Tax=Medicago truncatula RepID=G7JB13_MEDTR
Glyma01g35910	Gm01:48361827-48364787	133.784	16.8604	-2.9882	G7K3Y7 50S ribosomal protein L14 n=1 Tax=Medicago truncatula RepID=G7K3Y7_MEDTR			Glyma02g14450	Gm02:13039006-13041582	4.97408	22.0558	2.14866	P30080 Chalcone synthase 6 n=1 Tax=Glycine max RepID=CHS6_SOYBN
Glyma02g39200	Gm02:44465219-44471499	20.044	2.53059	-2.98563	G7JZH6 ATP-dependent Clp protease ATP-binding subunit clpL n=1 Tax=Medicago truncatula RepID=G7JZH6_MEDTR			Glyma02g18780	Gm02:17498586-17521217	0.684406	3.03804	2.15022	G7KHD1 Receptor-like protein kinase n=1 Tax=Medicago truncatula RepID=G7KHD1_MEDTR
Glyma08g45150	Gm08:44576095-44578692	64.0238	8.09545	-2.98343	Q10NL6 Expressed protein n=1 Tax=Oryza sativa Japonica Group RepID=Q10NL6_ORYSJ			Glyma11g18320	Gm11:14987514-14991057	7.31878	32.5343	2.15229	D7LMI4 Pyridine nucleotide-disulfide oxidoreductase family protein n=1 Tax=Arabidopsis lyrata subsp. lyrata RepID=D7LMI4_ARALL
Glyma07g34360	Gm07:39248536-39256780	0.972302	0.12329	-2.97935	B9SJ59 Sulfate transporter, putative n=1 Tax=Ricinus communis RepID=B9SJ59_RICCO			Glyma06g47200	Gm06:49702658-49708203	11.1276	49.491	2.15302	I1KFM8 Pectinesterase n=1 Tax=Glycine max RepID=I1KFM8_SOYBN
Glyma11g28190	Gm11:28261545-28264529	0.896898	0.113962	-2.97639	B9SGZ0 N-acetyltransferase, putative n=1 Tax=Ricinus communis RepID=B9SGZ0_RICCO			Glyma08g06871	Gm08:4922253-4923295	0.743567	3.30758	2.15324	NA
Glyma06g44600	Gm06:47485354-47489051	16.9576	2.16917	-2.96672	G7JTU9 O-acyltransferase WSD1 n=1 Tax=Medicago truncatula RepID=G7JTU9_MEDTR			Glyma10g02940	Gm10:2128480-2132917	18.9903	84.5429	2.15442	G7I2K6 Speckle-type POZ protein n=1 Tax=Medicago truncatula RepID=G7I2K6_MEDTR
Glyma16g00650	Gm16:343214-350061	27.6888	3.54197	-2.96668	F8WLB2 Ankyrin repeat family protein n=1 Tax=Citrus unshiu RepID=F8WLB2_CITUN			Glyma09g00610	Gm09:302806-305146	1.49917	6.67457	2.15451	D7MKD0 Small molecular weight G-protein 1 n=1 Tax=Arabidopsis lyrata subsp. lyrata RepID=D7MKD0_ARALL
Glyma08g37240	Gm08:35601957-35603830	5.35072	0.685536	-2.96443	A9YWR2 BHLH transcription factor n=1 Tax=Medicago truncatula RepID=A9YWR2_MEDTR			Glyma07g33490	Gm07:38412654-38416761	7.76501	34.5786	2.15482	G7JL95 DEM2 n=1 Tax=Medicago truncatula RepID=G7JL95_MEDTR
Glyma06g43560	Gm06:46581216-46583485	1.21643	0.155931	-2.96368	G7JCJ8 Transcription factor bHLH30 n=1 Tax=Medicago truncatula RepID=G7JCJ8_MEDTR			Glyma11g00710	Gm11:344774-349327	1.63938	7.30151	2.15505	G7K2C5 Hexose transporter n=1 Tax=Medicago truncatula RepID=G7K2C5_MEDTR
Glyma01g11640	Gm01:14972818-14973806	31.5312	4.05965	-2.95735	P01070 Trypsin inhibitor A n=1 Tax=Glycine max RepID=ITRA_SOYBN			Glyma16g25071	Gm16:28995807-29006764	5.1752	23.0519	2.1552	C6ZS35 Resistance protein n=1 Tax=Glycine max RepID=C6ZS35_SOYBN
Glyma10g43150	Gm10:49944156-49948348	14.9154	1.924	-2.95462	G7IE86 Pentatricopeptide repeat-containing protein n=1 Tax=Medicago truncatula RepID=G7IE86_MEDTR			Glyma18g49540	Gm18:58932313-58933700	0.99816	4.44741	2.15562	G7JUB9 Calcium-binding mitochondrial carrier protein SCaMC-1 n=1 Tax=Medicago truncatula RepID=G7JUB9_MEDTR
Glyma17g12230	Gm17:9256005-9258430	8.36807	1.08281	-2.95012	G7JE40 Equilibrative nucleoside transporter n=1 Tax=Medicago truncatula RepID=G7JE40_MEDTR			Glyma14g39660	Gm14:48710869-48712618	1.51681	6.76166	2.15634	G7K1X5 Polcalcin Nic t n=1 Tax=Medicago truncatula RepID=G7K1X5_MEDTR
Glyma02g47280	Gm02:50927143-50929908	42.2571	5.47133	-2.94923	I1JJM3 Fructose-bisphosphate aldolase n=1 Tax=Glycine max RepID=I1JJM3_SOYBN			Glyma15g08560	Gm15:6066693-6067881	4.62841	20.6622	2.15841	G7IFJ0 Ethylene-responsive transcription factor n=1 Tax=Medicago truncatula RepID=G7IFJ0_MEDTR
Glyma10g00460	Gm10:227201-229373	8.4832	1.10106	-2.94571	Q9SIH9 Expressed protein n=1 Tax=Arabidopsis thaliana RepID=Q9SIH9_ARATH			Glyma13g44594	Gm13:43982799-43987149	6.03562	26.9609	2.15929	G7IMB3 Transcription factor bHLH18 n=1 Tax=Medicago truncatula RepID=G7IMB3_MEDTR
Glyma02g43550	Gm02:48326425-48330582	13.12	1.70489	-2.94402	G7KH96 Tyrosine specific protein phosphatase family protein n=1 Tax=Medicago truncatula RepID=G7KH96_MEDTR			Glyma01g35010	Gm01:47557393-47559050	0.83323	3.72633	2.16097	B9RRY3 Transcriptional factor TINY, putative n=1 Tax=Ricinus communis RepID=B9RRY3_RICCO
Glyma08g11570	Gm08:8425478-8431052	2.18201	0.283779	-2.94282	G7K4E9 Cytochrome P450 71D10 n=1 Tax=Medicago truncatula RepID=G7K4E9_MEDTR			Glyma17g03330	Gm17:2209759-2210882	1.35943	6.08115	2.16134	B9RTB8 Major allergen Pru ar, putative n=1 Tax=Ricinus communis RepID=B9RTB8_RICCO
Glyma02g01650	Gm02:1187187-1188265	2.48164	0.323091	-2.94128	G7IDR9 Multidrug resistance protein ABC transporter family protein n=1 Tax=Medicago truncatula RepID=G7IDR9_MEDTR			Glyma11g13380	Gm11:9495729-9498628	11.8321	53.0077	2.1635	B9U2H7 Peroxisome biogenesis factor 13 n=1 Tax=Nicotiana tabacum RepID=B9U2H7_TOBAC
Glyma09g41300	Gm09:46006338-46008389	9.42128	1.22837	-2.93918	B9RVE0 CBL-interacting serine/threonine-protein kinase, putative n=1 Tax=Ricinus communis RepID=B9RVE0_RICCO			Glyma13g41600	Gm13:41852385-41856779	22.5712	101.156	2.16403	Q56I14 TPR-containing protein kinase n=1 Tax=Glycine max RepID=Q56I14_SOYBN
Glyma08g08761	Gm08:6264864-6267352	54.9338	7.18228	-2.93518	B9T576 Ankyrin repeat-containing protein, putative n=1 Tax=Ricinus communis RepID=B9T576_RICCO			Glyma18g01680	Gm18:943422-949991	12.6245	56.6801	2.16662	Q9LIN9 O-fucosyltransferase family protein n=2 Tax=Arabidopsis thaliana RepID=Q9LIN9_ARATH
Glyma13g33420	Gm13:35269872-35272451	13.7189	1.79573	-2.93352	D0EP06 CONSTANS-like zinc finger protein n=1 Tax=Glycine max RepID=D0EP06_SOYBN			Glyma05g28960	Gm05:34684162-34684654	8.52374	38.2785	2.16698	Q0GPG2 BZIP transcription factor bZIP111 n=1 Tax=Glycine max RepID=Q0GPG2_SOYBN
Glyma07g16620	Gm07:16324554-16325084	8.5702	1.12301	-2.93196	NA			Glyma14g01990	Gm14:1169081-1172360	19.1678	86.132	2.16787	G7K252 Zinc finger CCCH domain-containing protein n=1 Tax=Medicago truncatula RepID=G7K252_MEDTR
Glyma12g08590	Gm12:6347434-6349163	12.2207	1.60352	-2.93002	Q9FFB5 Emb|CAB89309.1 n=1 Tax=Arabidopsis thaliana RepID=Q9FFB5_ARATH			Glyma13g36260	Gm13:37541849-37544477	49.8512	224.017	2.16791	B7FHX6 Transcription factor ILR3 n=1 Tax=Medicago truncatula RepID=B7FHX6_MEDTR
Glyma06g46761	Gm06:49335143-49341393	8.6059	1.12944	-2.92972	B9SHT2 Cytochrome P450, putative n=1 Tax=Ricinus communis RepID=B9SHT2_RICCO			Glyma12g09830	Gm12:7580075-7583857	3.53496	15.9098	2.17015	B9SCZ3 Ccr4-associated factor, putative n=1 Tax=Ricinus communis RepID=B9SCZ3_RICCO
Glyma12g34731	Gm12:37869350-37870200	15.9199	2.09109	-2.92851	B9SIE5 Cytoplasmic dynein light chain, putative n=1 Tax=Ricinus communis RepID=B9SIE5_RICCO			Glyma05g20710	Gm05:24873226-24875484	11.1633	50.2625	2.17072	B0LUS5 Transcription factor n=1 Tax=Glycine max RepID=B0LUS5_SOYBN
Glyma12g05890	Gm12:3978676-3982436	9.87512	1.29825	-2.92723	B9RI82 Transcription factor, putative n=1 Tax=Ricinus communis RepID=B9RI82_RICCO			Glyma08g14931	Gm08:10864732-10866245	0.898797	4.04776	2.17106	G7LB97 Nuclear transcription factor Y subunit B-3 n=1 Tax=Medicago truncatula RepID=G7LB97_MEDTR
Glyma06g45475	Gm06:48184318-48186803	3.85283	0.507813	-2.92355	G7IRN0 GPI-anchored protein, putative n=1 Tax=Medicago truncatula RepID=G7IRN0_MEDTR			Glyma20g01930	Gm20:1455147-1456087	0.729706	3.28999	2.1727	B9RQT7 Heat-shock protein, putative n=1 Tax=Ricinus communis RepID=B9RQT7_RICCO
Glyma11g36910	Gm11:38205219-38206454	7.04497	0.932841	-2.91689	Q2R3Y3 Expressed protein n=1 Tax=Oryza sativa Japonica Group RepID=Q2R3Y3_ORYSJ			Glyma11g08260	Gm11:5858171-5860046	1.08193	4.87828	2.17276	G7JXI1 Thiosulfate sulfurtransferase n=1 Tax=Medicago truncatula RepID=G7JXI1_MEDTR
Glyma04g02580	Gm04:1835971-1839583	26.9756	3.57947	-2.91384	G7I7Q3 Thaumatin-like protein n=1 Tax=Medicago truncatula RepID=G7I7Q3_MEDTR			Glyma18g51273	Gm18:60204210-60205594	1.07336	4.84118	2.17323	NA
Glyma11g12931	Gm11:9250715-9258619	1.10649	0.147015	-2.91195	B9S8S3 Electron transporter, putative n=1 Tax=Ricinus communis RepID=B9S8S3_RICCO			Glyma11g10130	Gm11:7239839-7244364	2.74845	12.4071	2.17448	G7K998 Hexokinase n=1 Tax=Medicago truncatula RepID=G7K998_MEDTR
Glyma20g36520	Gm20:44604549-44606011	41.739	5.54693	-2.91163	Q8H1P3 Phosphoenolpyruvate carboxylase kinase n=1 Tax=Glycine max RepID=Q8H1P3_SOYBN			Glyma03g07590	Gm03:8198748-8214892	0.387837	1.75086	2.17454	G7JN34 Zinc finger and SCAN domain-containing protein n=1 Tax=Medicago truncatula RepID=G7JN34_MEDTR
Glyma03g40181	Gm03:45997106-46001020	0.96811	0.128765	-2.91043	B9REZ5 Histidine-containing phosphotransfer protein, putative n=1 Tax=Ricinus communis RepID=B9REZ5_RICCO			Glyma03g04920	Gm03:5122290-5124070	7.38	33.3366	2.17541	C6TFP9 Non-specific lipid-transfer protein n=1 Tax=Glycine max RepID=C6TFP9_SOYBN
Glyma10g00570	Gm10:325832-329495	33.6338	4.48606	-2.90639	A1IGR2 Chlorophyllase 1 n=1 Tax=Glycine max RepID=A1IGR2_SOYBN			Glyma13g40161	Gm13:40709181-40710667	0.585659	2.64651	2.17596	D1L6R1 Geranyl geranyl pyrophosphate synthase (Fragment) n=1 Tax=Linum usitatissimum RepID=D1L6R1_LINUS
Glyma12g35870	Gm12:39004865-39007829	2.40432	0.321041	-2.9048	G7IH46 GEM-like protein n=1 Tax=Medicago truncatula RepID=G7IH46_MEDTR			Glyma01g42200	Gm01:53500794-53504338	4.12856	18.6565	2.17597	B9RBU8 Amino acid binding protein, putative n=1 Tax=Ricinus communis RepID=B9RBU8_RICCO
Glyma18g50660	Gm18:59723374-59725966	2.70265	0.363118	-2.89586	C6ZRP1 Receptor-like kinase n=2 Tax=Glycine max RepID=C6ZRP1_SOYBN			Glyma18g50420	Gm18:59567498-59572762	5.16048	23.349	2.17778	B9T5M4 Esterase PIR7B, putative n=1 Tax=Ricinus communis RepID=B9T5M4_RICCO
Glyma11g20860	Gm11:17667056-17671644	10.1002	1.36043	-2.89225	G7J129 Cytokinin dehydrogenase n=1 Tax=Medicago truncatula RepID=G7J129_MEDTR			Glyma03g40860	Gm03:46483451-46485502	66.5472	301.11	2.17784	C6TBN2 Probable aldo-keto reductase 1 n=1 Tax=Glycine max RepID=AKR1_SOYBN
Glyma11g13911	Gm11:9935207-9938773	6.99215	0.942382	-2.89135	B9RI82 Transcription factor, putative n=1 Tax=Ricinus communis RepID=B9RI82_RICCO			Glyma17g36150	Gm17:40170177-40175944	3.65733	16.5539	2.17831	G7I3N5 Protein phosphatase 2C-like protein n=1 Tax=Medicago truncatula RepID=G7I3N5_MEDTR
Glyma20g32520	Gm20:41126215-41129538	1.51231	0.204537	-2.88632	Q8L4Y9 BHLH transcription factor-like protein n=1 Tax=Oryza sativa Japonica Group RepID=Q8L4Y9_ORYSJ			Glyma05g31190	Gm05:36357224-36365346	3.60301	16.3135	2.17879	E5D5L1 Calmodulin-binding protein n=1 Tax=Solanum lycopersicum RepID=E5D5L1_SOLLC
Glyma18g02280	Gm18:1430346-1434019	12.7798	1.73104	-2.88416	G7J4D4 Aspartic proteinase-like protein n=1 Tax=Medicago truncatula RepID=G7J4D4_MEDTR			Glyma06g07170	Gm06:5207206-5210535	1.1213	5.07751	2.17894	G7JB13 Kinase-like protein n=1 Tax=Medicago truncatula RepID=G7JB13_MEDTR
Glyma12g36530	Gm12:39572479-39578628	12.6846	1.72086	-2.88188	Q94IR2 Carotenoid 9,10(9',10')-cleavage dioxygenase 1 n=1 Tax=Phaseolus vulgaris RepID=CCD1_PHAVU			Glyma12g01835	Gm12:1121317-1127411	1.05749	4.79058	2.17956	G7IFB4 Methyltransferase FkbM family n=1 Tax=Medicago truncatula RepID=G7IFB4_MEDTR
Glyma02g13070	Gm02:11303354-11316969	14.1308	1.91999	-2.87967	G0T441 Purple acid phosphatases n=1 Tax=Glycine max RepID=G0T441_SOYBN			Glyma08g44670	Gm08:44222517-44226054	0.459094	2.08018	2.17985	Q8LE79 PRIB5 protein n=1 Tax=Arabidopsis thaliana RepID=Q8LE79_ARATH
Glyma11g25570	Gm11:24223799-24226453	5.50832	0.748884	-2.8788	D7LUT4 Transcription factor n=1 Tax=Arabidopsis lyrata subsp. lyrata RepID=D7LUT4_ARALL			Glyma04g10610	Gm04:8810557-8811580	0.902381	4.09233	2.18111	G7J4G7 RING-H2 finger protein ATL1N n=1 Tax=Medicago truncatula RepID=G7J4G7_MEDTR
Glyma02g38250	Gm02:43598260-43599613	17.2245	2.34707	-2.87553	G7KF59 Hydroxyproline-rich glycoprotein n=2 Tax=Medicago truncatula RepID=G7KF59_MEDTR			Glyma07g01230	Gm07:749207-759544	11.2786	51.2354	2.18356	B9SN36 Protein SEY1, putative n=1 Tax=Ricinus communis RepID=B9SN36_RICCO
Glyma04g36200	Gm04:42731237-42734117	2.67892	0.367575	-2.86554	G7KED3 Indole-3-acetate beta-glucosyltransferase n=1 Tax=Medicago truncatula RepID=G7KED3_MEDTR			Glyma13g41280	Gm13:41625235-41627233	0.58772	2.673	2.18526	B9T677 Ubiquitin fusion degradaton protein, putative n=1 Tax=Ricinus communis RepID=B9T677_RICCO
Glyma09g36480	Gm09:42217315-42222540	37.0938	5.09689	-2.86349	B9R9Q0 Hydrolase, putative n=1 Tax=Ricinus communis RepID=B9R9Q0_RICCO			Glyma13g36070	Gm13:37429003-37433767	1.17585	5.36058	2.18869	A2Q643 Major facilitator superfamily n=1 Tax=Medicago truncatula RepID=A2Q643_MEDTR
Glyma01g03580	Gm01:3090805-3093412	3.85531	0.530699	-2.86088	G7K086 Axial regulator YABBY n=1 Tax=Medicago truncatula RepID=G7K086_MEDTR			Glyma12g31200	Gm12:34788211-34790103	0.815526	3.71941	2.18927	G7IHH4 F-box family protein n=1 Tax=Medicago truncatula RepID=G7IHH4_MEDTR
Glyma12g24250	Gm12:27055416-27057252	10.3864	1.43054	-2.86006	Q9FZA1 F3H9.7 protein n=3 Tax=Arabidopsis thaliana RepID=Q9FZA1_ARATH			Glyma08g00770	Gm08:400209-404391	13.9591	63.6913	2.18989	Q43466 Protein kinase 3 n=1 Tax=Glycine max RepID=Q43466_SOYBN
Glyma04g33771	Gm04:39567264-39569693	4.2168	0.580947	-2.85967	G7JQY3 Transcription factor PCF2 n=1 Tax=Medicago truncatula RepID=G7JQY3_MEDTR			Glyma08g11300	Gm08:8246329-8249003	25.4269	116.015	2.18989	P35694 Brassinosteroid-regulated protein BRU1 n=2 Tax=Glycine max RepID=BRU1_SOYBN
Glyma04g40020	Gm04:46169390-46171448	10.1083	1.39684	-2.85531	B9S4E7 RING-H2 finger protein ATL3C, putative n=1 Tax=Ricinus communis RepID=B9S4E7_RICCO			Glyma14g04110	Gm14:2738289-2742849	1.64983	7.52776	2.18991	G7IZR1 Hydroxymethylglutaryl-CoA lyase n=2 Tax=Medicago truncatula RepID=G7IZR1_MEDTR
Glyma17g34170	Gm17:38030197-38032524	1.17187	0.162484	-2.85045	Q6UY57 Lectin-like receptor kinase n=1 Tax=Medicago truncatula RepID=Q6UY57_MEDTR			Glyma10g39451	Gm10:47118921-47120992	29.9857	136.853	2.19028	B7FKK9 Phosphate metabolism protein n=1 Tax=Medicago truncatula RepID=B7FKK9_MEDTR
Glyma09g28750	Gm09:35681928-35684967	21.2823	2.96234	-2.84484	Q9LXB0 AT5g10580/F12B17_70 n=1 Tax=Arabidopsis thaliana RepID=Q9LXB0_ARATH			Glyma08g15450	Gm08:11214875-11218970	2.50974	11.4611	2.19113	J8RQF7 LPXTG-domain-containing protein cell wall anchor domain (Fragment) n=1 Tax=Bacillus cereus BAG2X1-2 RepID=J8RQF7_BACCE
Glyma08g45830	Gm08:45098875-45101479	2.5258	0.3522	-2.84227	Q9LV64 Gb|AAD28645.1 n=1 Tax=Arabidopsis thaliana RepID=Q9LV64_ARATH			Glyma01g35640	Gm01:48145384-48152470	1.58674	7.24711	2.19134	G7K419 LSM14-like protein n=1 Tax=Medicago truncatula RepID=G7K419_MEDTR
Glyma03g42420	Gm03:47651621-47653158	4.31597	0.601848	-2.84221	C0Z2Q5 AT3G14280 protein n=1 Tax=Arabidopsis thaliana RepID=C0Z2Q5_ARATH			Glyma20g03840	Gm20:3731520-3732985	2.11997	9.68842	2.19222	Q9SF17 F26K24.10 protein n=1 Tax=Arabidopsis thaliana RepID=Q9SF17_ARATH
Glyma10g11100	Gm10:11200165-11206482	5.50741	0.768557	-2.84115	B9SDP7 Transferrin receptor protein, putative n=1 Tax=Ricinus communis RepID=B9SDP7_RICCO			Glyma11g15200	Gm11:10892390-10894193	5.47759	25.0503	2.19322	Q39883 Nodulin-26 n=1 Tax=Glycine max RepID=Q39883_SOYBN
Glyma07g09570	Gm07:8000061-8001261	16.5045	2.30345	-2.84099	NA			Glyma03g32430	Gm03:40177259-40181110	64.2648	294.046	2.19394	G7KXF9 TPR domain protein n=2 Tax=Medicago truncatula RepID=G7KXF9_MEDTR
Glyma03g39081	Gm03:45299673-45302473	6.17128	0.861394	-2.84082	B9RFI5 Peptide chain release factor, putative n=1 Tax=Ricinus communis RepID=B9RFI5_RICCO			Glyma13g16940	Gm13:20802266-20807803	30.2718	138.618	2.19507	B9RRB8 12-oxophytodienoate reductase opr, putative n=1 Tax=Ricinus communis RepID=B9RRB8_RICCO
Glyma19g01460	Gm19:1074974-1079630	36.1393	5.05118	-2.83888	B9RUD0 Auxin-induced protein 5NG4, putative n=1 Tax=Ricinus communis RepID=B9RUD0_RICCO			Glyma20g06780	Gm20:9318366-9323133	0.468026	2.14333	2.19519	G7JDB8 NBS-containing resistance-like protein n=1 Tax=Medicago truncatula RepID=G7JDB8_MEDTR
Glyma10g43720	Gm10:50307607-50310287	9.22368	1.29329	-2.8343	G7KVN5 Plant-specific domain TIGR01589 family protein n=1 Tax=Medicago truncatula RepID=G7KVN5_MEDTR			Glyma02g11151	Gm02:9352739-9357431	0.834143	3.82041	2.19536	B2ZHZ5 Stress-induced receptor-like kinase n=2 Tax=Glycine max RepID=B2ZHZ5_SOYBN
Glyma18g13840	Gm18:13412166-13427544	75.9647	10.6567	-2.83357	G7J187 Anthranilate N-benzoyltransferase protein n=1 Tax=Medicago truncatula RepID=G7J187_MEDTR			Glyma08g11460	Gm08:8333674-8338603	3.67944	16.8548	2.1956	G7LH28 Heat stress transcription factor A-5 n=1 Tax=Medicago truncatula RepID=G7LH28_MEDTR
Glyma09g28401	Gm09:35373480-35377634	2.62563	0.368456	-2.8331	B9S081 Peptide chain release factor, putative n=1 Tax=Ricinus communis RepID=B9S081_RICCO			Glyma20g02310	Gm20:1950345-1952463	6.83676	31.319	2.19565	Q2LAK3 Cytochrome P450 monooxygenase CYP89H3 (Fragment) n=1 Tax=Glycine max RepID=Q2LAK3_SOYBN
Glyma16g05920	Gm16:5368587-5369391	6.6132	0.929168	-2.83134	NA			Glyma17g12700	Gm17:9573368-9577020	0.31956	1.46403	2.19578	A4PBE8 Cytochrome P450 enzyme n=1 Tax=Pisum sativum RepID=A4PBE8_PEA
Glyma10g12060	Gm10:12697959-12702044	10.3692	1.45874	-2.82951	B9II24 Cytochrome P450 n=1 Tax=Populus trichocarpa RepID=B9II24_POPTR			Glyma06g40390	Gm06:43544678-43546530	0.889036	4.0771	2.19723	C6ZJB2 UGT1 n=1 Tax=Pueraria montana var. lobata RepID=C6ZJB2_PUEML
Glyma05g34530	Gm05:38834623-38838042	19.1477	2.70095	-2.82564	B9MST1 Circadian clock-associated FKF1 n=1 Tax=Glycine max RepID=B9MST1_SOYBN			Glyma12g28620	Gm12:31949242-31956119	9.34339	42.851	2.19731	G7ILG8 Lysine ketoglutarate reductase trans-splicing-like protein n=1 Tax=Medicago truncatula RepID=G7ILG8_MEDTR
Glyma02g11750	Gm02:9979620-9980970	50.4298	7.12799	-2.82271	Q3LVG1 TO109-12 (Fragment) n=1 Tax=Taraxacum officinale RepID=Q3LVG1_TAROF			Glyma04g03761	Gm04:2756316-2757235	0.828524	3.8082	2.20049	NA
Glyma07g39230	Gm07:43754716-43756612	11.6343	1.64693	-2.82053	D7KUS7 C4-dicarboxylate transporter/malic acid transport family protein n=1 Tax=Arabidopsis lyrata subsp. lyrata RepID=D7KUS7_ARALL			Glyma17g13110	Gm17:10050215-10051165	2.35357	10.8188	2.20061	Q9LII3 AT3g18560/K24M9_5 n=1 Tax=Arabidopsis thaliana RepID=Q9LII3_ARATH
Glyma17g36320	Gm17:40278058-40278993	15.0304	2.13319	-2.8168	NA			Glyma11g19560	Gm11:16331872-16333516	0.662966	3.04806	2.20089	G7ISS3 Pentatricopeptide repeat-containing protein n=1 Tax=Medicago truncatula RepID=G7ISS3_MEDTR
Glyma02g07790	Gm02:6168093-6171631	2.41311	0.342986	-2.81468	B9SHH4 Transcription factor, putative n=1 Tax=Ricinus communis RepID=B9SHH4_RICCO			Glyma01g27005	Gm01:35977333-35983210	1.85724	8.54023	2.20111	G7JS84 DUF246 domain-containing protein n=1 Tax=Medicago truncatula RepID=G7JS84_MEDTR
Glyma02g01850	Gm02:1322272-1323468	15.3023	2.19071	-2.80427	NA			Glyma17g12150	Gm17:9188520-9189645	7.32392	33.7141	2.20266	G7JE55 Blue copper protein n=1 Tax=Medicago truncatula RepID=G7JE55_MEDTR
Glyma10g33020	Gm10:41379818-41384065	5.27366	0.756429	-2.80153	E8Z9A4 Phosphate transporter1-6 n=1 Tax=Glycine max RepID=E8Z9A4_SOYBN			Glyma05g34200	Gm05:38595539-38597431	5.83561	26.8856	2.20387	Q7XST6 OSJNBa0039K24.20 protein n=2 Tax=Oryza sativa Japonica Group RepID=Q7XST6_ORYSJ
Glyma12g04850	Gm12:3218223-3219536	4.23462	0.608043	-2.79999	Q9FUP6 Suspensor-specific protein n=1 Tax=Phaseolus coccineus RepID=Q9FUP6_PHACN			Glyma19g32580	Gm19:40332904-40336988	3.52966	16.2708	2.20469	A2Q3F1 Cornichon n=1 Tax=Medicago truncatula RepID=A2Q3F1_MEDTR
Glyma07g21120	Gm07:21559994-21561100	62.7412	9.02107	-2.79804	Q9XIM6 Expressed protein n=1 Tax=Arabidopsis thaliana RepID=Q9XIM6_ARATH			Glyma18g51715	Gm18:60515660-60521752	7.28921	33.6038	2.20479	B9IP02 Nbs-lrr resistance protein n=1 Tax=Populus trichocarpa RepID=B9IP02_POPTR
Glyma16g29400	Gm16:33218463-33219888	4.48752	0.646437	-2.79534	A6BM07 UDP-glucose:isoflavone 7-O-glucosyltransferase n=1 Tax=Glycine max RepID=A6BM07_SOYBN			Glyma07g11330	Gm07:9509585-9516011	1.92829	8.89366	2.20545	G8A0D0 Myb-like DNA-binding protein BAS1 n=1 Tax=Medicago truncatula RepID=G8A0D0_MEDTR
Glyma14g39690	Gm14:48721600-48724907	4.71444	0.686773	-2.77918	Q8LGB4 Protein kinase family protein n=2 Tax=Arabidopsis thaliana RepID=Q8LGB4_ARATH			Glyma02g28830	Gm02:29996077-29999180	3.69549	17.0499	2.20593	D7KZN7 Aha1 domain-containing protein n=1 Tax=Arabidopsis lyrata subsp. lyrata RepID=D7KZN7_ARALL
Glyma05g33850	Gm05:38373906-38376831	2.77391	0.404386	-2.77811	J7JYT7 NARROW ORGAN 1 n=1 Tax=Lotus japonicus RepID=J7JYT7_LOTJA			Glyma17g13751	Gm17:10537301-10542043	29.3808	135.672	2.20717	G7JMK1 Cyclin dependent kinase n=1 Tax=Medicago truncatula RepID=G7JMK1_MEDTR
Glyma06g38160	Gm06:40988896-40992184	211.012	30.8058	-2.77606	Q9LKH8 NADPH-protochlorophyllide oxidoreductase n=1 Tax=Vigna radiata var. radiata RepID=Q9LKH8_VIGRR			Glyma08g15280	Gm08:11082251-11083891	2.06989	9.56031	2.20751	B9RJG7 Phosphoglycerate mutase, putative n=1 Tax=Ricinus communis RepID=B9RJG7_RICCO
Glyma09g05170	Gm09:3948569-3950737	5.35544	0.7827	-2.77447	B9RT28 Flavonol synthase/flavanone 3-hydroxylase, putative n=1 Tax=Ricinus communis RepID=B9RT28_RICCO			Glyma01g03820	Gm01:3263267-3267637	12.3498	57.0423	2.20755	C7A2A0 Mitochondrial benzaldehyde dehydrogenase n=1 Tax=Antirrhinum majus RepID=C7A2A0_ANTMA
Glyma07g23800	Gm07:25925374-25928052	27.894	4.08052	-2.77313	Q9ZVE7 Chlororespiratory reduction 3 n=1 Tax=Arabidopsis thaliana RepID=Q9ZVE7_ARATH			Glyma18g09920	Gm18:8769139-8772962	4.43006	20.4645	2.20772	C6ZS21 Disease resistance protein n=1 Tax=Glycine max RepID=C6ZS21_SOYBN
Glyma12g09570	Gm12:7359209-7360502	4.19193	0.614539	-2.77004	Q2QXI9 Expressed protein n=2 Tax=Oryza sativa RepID=Q2QXI9_ORYSJ			Glyma04g07430	Gm04:5770333-5773812	4.03604	18.6506	2.20821	B9RKV0 Protein phosphatase 2c, putative n=1 Tax=Ricinus communis RepID=B9RKV0_RICCO
Glyma20g24390	Gm20:34075338-34080507	16.503	2.42209	-2.7684	B9SQ91 Pentatricopeptide repeat-containing protein, putative n=1 Tax=Ricinus communis RepID=B9SQ91_RICCO			Glyma19g44451	Gm19:49877639-49880955	1.86334	8.6122	2.20849	G7L436 Cyclic nucleotide-gated channel C n=1 Tax=Medicago truncatula RepID=G7L436_MEDTR
Glyma01g39850	Gm01:51698415-51700257	29.3302	4.31334	-2.76551	G7K3X2 Sigma factor sigB regulation protein rsbQ n=1 Tax=Medicago truncatula RepID=G7K3X2_MEDTR			Glyma07g06350	Gm07:5071397-5076475	4.1963	19.3976	2.20868	Q6K2T0 Extra-large G-protein-like n=2 Tax=Oryza sativa RepID=Q6K2T0_ORYSJ
Glyma06g15740	Gm06:12392129-12393075	6.68405	0.983456	-2.76479	G7JBI0 Pectinesterase inhibitor n=1 Tax=Medicago truncatula RepID=G7JBI0_MEDTR			Glyma04g04250	Gm04:3164052-3165462	0.331464	1.53541	2.2117	Q00M86 N-hydroxycinnamoyl/benzoyltransferase 4 n=1 Tax=Glycine max RepID=Q00M86_SOYBN
Glyma13g42100	Gm13:42191817-42193149	5.49767	0.810531	-2.76188	B9MY72 GRAS family transcription factor n=1 Tax=Populus trichocarpa RepID=B9MY72_POPTR			Glyma06g07550	Gm06:5484471-5487807	2.20941	10.2493	2.21379	B9RKV0 Protein phosphatase 2c, putative n=1 Tax=Ricinus communis RepID=B9RKV0_RICCO
Glyma03g03640	Gm03:3434322-3437087	2.30142	0.339469	-2.76118	Q2LAL4 Cytochrome P450 monooxygenase CYP83E8 n=1 Tax=Glycine max RepID=Q2LAL4_SOYBN			Glyma13g40100	Gm13:40664579-40666375	118.524	550.113	2.21455	Q2TFP3 PIP2,2 n=1 Tax=Glycine max RepID=Q2TFP3_SOYBN
Glyma17g17460	Gm17:14272185-14277279	5.19077	0.765969	-2.76059	G7K3T6 Formin-like protein n=1 Tax=Medicago truncatula RepID=G7K3T6_MEDTR			Glyma14g06450	Gm14:4706463-4711382	36.5062	169.465	2.21477	Q43443 Phosphoinositide-specific phospholipase C P13 n=1 Tax=Glycine max RepID=Q43443_SOYBN
Glyma12g04720	Gm12:3122798-3127204	8.06674	1.19092	-2.75991	G7JG65 mTERF domain-containing protein n=1 Tax=Medicago truncatula RepID=G7JG65_MEDTR			Glyma03g40900	Gm03:46507039-46512832	4.11114	19.0975	2.21577	A6MGY3 IFA binding protein n=1 Tax=Lilium longiflorum RepID=A6MGY3_LILLO
Glyma07g14840	Gm07:14680247-14680769	12.0997	1.78716	-2.75922	NA			Glyma20g04870	Gm20:5282267-5286356	7.7104	35.8281	2.21621	B9S8W6 Membrane associated ring finger 1,8, putative n=1 Tax=Ricinus communis RepID=B9S8W6_RICCO
Glyma11g12960	Gm11:9270626-9272191	28.4515	4.22397	-2.75183	Q42785 Nonsymbiotic hemoglobin n=3 Tax=Glycine max RepID=Q42785_SOYBN			Glyma18g09220	Gm18:8096589-8100424	1.86415	8.68567	2.22012	C6ZS21 Disease resistance protein n=1 Tax=Glycine max RepID=C6ZS21_SOYBN
Glyma09g39570	Gm09:44627762-44635509	2.08934	0.311192	-2.74717	Q2HTI9 2OG-Fe(II) oxygenase n=2 Tax=Medicago truncatula RepID=Q2HTI9_MEDTR			Glyma08g28750	Gm08:23126563-23128323	18.83	87.792	2.22106	F6KBT5 Allene oxide cyclase 5 n=1 Tax=Glycine max RepID=F6KBT5_SOYBN
Glyma14g01470	Gm14:826071-828002	211.69	31.68	-2.74031	I1M6D5 Fructose-bisphosphate aldolase n=1 Tax=Glycine max RepID=I1M6D5_SOYBN			Glyma08g18980	Gm08:14320655-14321857	1.94208	9.06535	2.22276	E4MW96 mRNA, clone: RTFL01-07-O09 n=1 Tax=Eutrema halophilum RepID=E4MW96_THEHA
Glyma19g13280	Gm19:16453541-16456104	4.8964	0.734196	-2.73748	B9SF93 Heat shock protein binding protein, putative n=1 Tax=Ricinus communis RepID=B9SF93_RICCO			Glyma06g19590	Gm06:15887622-15895018	7.04484	32.9015	2.22351	B9RB53 Trehalose-6-phosphate synthase, putative n=1 Tax=Ricinus communis RepID=B9RB53_RICCO
Glyma15g04190	Gm15:2933793-2936281	1.94506	0.292389	-2.73385	G7JUT7 Scarecrow-like protein n=1 Tax=Medicago truncatula RepID=G7JUT7_MEDTR			Glyma17g15530	Gm17:12289966-12291734	1.87685	8.76566	2.22355	B9T280 Triacylglycerol lipase, putative n=1 Tax=Ricinus communis RepID=B9T280_RICCO
Glyma05g28370	Gm05:34197426-34201630	8.17032	1.22831	-2.73372	G7LH38 Subtilisin-like protease n=1 Tax=Medicago truncatula RepID=G7LH38_MEDTR			Glyma18g02650	Gm18:1681002-1690844	9.38181	43.827	2.22388	G7J2E9 Arogenate dehydrogenase n=1 Tax=Medicago truncatula RepID=G7J2E9_MEDTR
Glyma10g26990	Gm10:35502575-35507507	2.33303	0.351141	-2.73208	B0F827 Zinc finger-like protein n=1 Tax=Cucumis sativus RepID=B0F827_CUCSA			Glyma14g10320	Gm14:8477711-8492627	1.63052	7.626	2.2256	F4IBD7 Lipase/hydrolase n=2 Tax=Arabidopsis thaliana RepID=F4IBD7_ARATH
Glyma20g27596	Gm20:36733100-36737946	8.87395	1.33653	-2.73109	G8A0W8 Cysteine-rich receptor-like protein kinase n=3 Tax=Medicago truncatula RepID=G8A0W8_MEDTR			Glyma18g49900	Gm18:59205164-59210648	12.7856	59.8647	2.22718	B7FKZ3 CCP n=1 Tax=Medicago truncatula RepID=B7FKZ3_MEDTR
Glyma14g37590	Gm14:46863103-46868336	6.95065	1.04705	-2.73082	B9SKV0 Protein kinase, putative n=1 Tax=Ricinus communis RepID=B9SKV0_RICCO			Glyma02g05320	Gm02:4304441-4306962	0.426628	1.99952	2.2286	G7LC24 Thaumatin-like protein n=1 Tax=Medicago truncatula RepID=G7LC24_MEDTR
Glyma12g11220	Gm12:9242530-9247838	0.511512	0.0771249	-2.7295	G7IRK8 Cysteine-rich receptor-like protein kinase n=1 Tax=Medicago truncatula RepID=G7IRK8_MEDTR			Glyma08g44590	Gm08:44160445-44163817	53.2373	249.537	2.22874	D6C500 HSP90-2 n=1 Tax=Glycine max RepID=D6C500_SOYBN
Glyma05g22210	Gm05:27294320-27297931	6.85407	1.03398	-2.72875	Q6AUY2 Expressed protein n=2 Tax=Oryza sativa Japonica Group RepID=Q6AUY2_ORYSJ			Glyma09g02550	Gm09:1739832-1742224	6.81155	31.9561	2.23004	B9SQ95 Patatin B2, putative n=1 Tax=Ricinus communis RepID=B9SQ95_RICCO
Glyma20g32020	Gm20:40643747-40646878	18.1668	2.74527	-2.72629	B9T3D3 N-acetyltransferase, putative n=1 Tax=Ricinus communis RepID=B9T3D3_RICCO			Glyma02g40510	Gm02:45783871-45787193	0.264626	1.24169	2.23028	G7K5X0 Coiled-coil domain-containing protein 109A n=1 Tax=Medicago truncatula RepID=G7K5X0_MEDTR
Glyma14g34330	Gm14:42798880-42800146	11.0345	1.6719	-2.72247	Q9SGZ8 F28K19.24 n=1 Tax=Arabidopsis thaliana RepID=Q9SGZ8_ARATH			Glyma08g48000	Gm08:46717844-46719971	1.2107	5.68356	2.23095	Q53RJ8 Expressed protein n=2 Tax=Oryza sativa RepID=Q53RJ8_ORYSJ
Glyma16g30180	Gm16:33826553-33831319	12.791	1.94452	-2.71764	B9RYP2 Transcription factor, putative n=1 Tax=Ricinus communis RepID=B9RYP2_RICCO			Glyma07g37800	Gm07:42747353-42750804	7.4738	35.1017	2.23163	B9RT35 Mitochondrial deoxynucleotide carrier, putative n=1 Tax=Ricinus communis RepID=B9RT35_RICCO
Glyma08g40831	Gm08:40690604-40693434	2.84112	0.432418	-2.71596	B9HV97 AP2 domain-containing transcription factor n=1 Tax=Populus trichocarpa RepID=B9HV97_POPTR			Glyma06g08880	Gm06:6482849-6488792	7.90864	37.2331	2.23508	G7ZWI6 Casein kinase I isoform delta-like protein n=1 Tax=Medicago truncatula RepID=G7ZWI6_MEDTR
Glyma04g12290	Gm04:11266408-11270505	2.67999	0.408116	-2.71518	G7IVD9 Endoglucanase n=1 Tax=Medicago truncatula RepID=G7IVD9_MEDTR			Glyma13g28090	Gm13:31175883-31178506	3.62947	17.0983	2.23602	G7IKE3 Carboxymethylenebutenolidase-like protein n=1 Tax=Medicago truncatula RepID=G7IKE3_MEDTR
Glyma03g02590	Gm03:2398355-2399000	13.1895	2.01064	-2.71366	G7L0A0 Calcium-binding protein CML24 n=1 Tax=Medicago truncatula RepID=G7L0A0_MEDTR			Glyma13g39261	Gm13:39913191-39919144	20.4751	96.4826	2.2364	B9SCU1 Glucan endo-1,3-beta-glucosidase, putative n=1 Tax=Ricinus communis RepID=B9SCU1_RICCO
Glyma11g19890	Gm11:16669489-16671331	12.4808	1.90273	-2.71357	Q9FFB5 Emb|CAB89309.1 n=1 Tax=Arabidopsis thaliana RepID=Q9FFB5_ARATH			Glyma15g42774	Gm15:50201487-50202321	15.868	74.7956	2.23683	NA
Glyma02g03810	Gm02:3035421-3038939	5.99868	0.915505	-2.71201	F4I5D7 NHL domain-containing protein n=2 Tax=Arabidopsis thaliana RepID=F4I5D7_ARATH			Glyma14g04180	Gm14:2808217-2811424	44.3421	209.042	2.23704	C6TLT7 Late-embryogenesis abundant protein 1 n=1 Tax=Glycine max RepID=C6TLT7_SOYBN
Glyma13g01313	Gm13:990558-992606	4.82984	0.73717	-2.71191	Q9FHH5 Protein GLUTAMINE DUMPER 3 n=1 Tax=Arabidopsis thaliana RepID=GDU3_ARATH			Glyma08g19430	Gm08:14689900-14693732	0.370825	1.74859	2.23738	G7IL84 Cytosolic fructose-1 6-bisphosphatase n=1 Tax=Medicago truncatula RepID=G7IL84_MEDTR
Glyma18g10090	Gm18:8899364-8903249	1.65851	0.25322	-2.71143	G7K8P9 Microtubule-associated protein MAP65-1a n=1 Tax=Medicago truncatula RepID=G7K8P9_MEDTR			Glyma18g32860	Gm18:38334560-38341246	0.886551	4.18513	2.239	G7K4H3 Multidrug resistance protein ABC transporter family n=1 Tax=Medicago truncatula RepID=G7K4H3_MEDTR
Glyma04g00920	Gm04:506455-507579	3.62939	0.556248	-2.70593	B9H0Z6 SAUR family protein n=1 Tax=Populus trichocarpa RepID=B9H0Z6_POPTR			Glyma20g30230	Gm20:38913155-38916046	10.101	47.722	2.24015	G4Y9K0 Beta-carotene hydroxylase 4 n=1 Tax=Glycine max RepID=G4Y9K0_SOYBN
Glyma10g26380	Gm10:34634530-34636111	40.7158	6.24789	-2.70415	NA			Glyma03g09080	Gm03:10489948-10492277	1.15395	5.45427	2.2408	G7JN13 Otubain n=1 Tax=Medicago truncatula RepID=G7JN13_MEDTR
Glyma13g23460	Gm13:26863530-26866178	2.42471	0.372491	-2.70253	G7JE40 Equilibrative nucleoside transporter n=1 Tax=Medicago truncatula RepID=G7JE40_MEDTR			Glyma09g04750	Gm09:3569893-3571414	3.06755	14.5041	2.2413	B9RT88 Ring finger protein, putative n=1 Tax=Ricinus communis RepID=B9RT88_RICCO
Glyma08g28900	Gm08:23237620-23240636	6.12589	0.945395	-2.69593	G7KSV5 LRR receptor-like serine/threonine-protein kinase FEI n=1 Tax=Medicago truncatula RepID=G7KSV5_MEDTR			Glyma03g34900	Gm03:42204660-42207243	1.83734	8.69274	2.24219	B9SRG8 DNA binding protein, putative n=1 Tax=Ricinus communis RepID=B9SRG8_RICCO
Glyma08g22120	Gm08:16790215-16794551	1.01662	0.157535	-2.69004	D4IIB0 Sulphate transporter n=1 Tax=Astragalus bisulcatus RepID=D4IIB0_ASTBI			Glyma15g23750	Gm15:23514634-23516313	0.588769	2.78639	2.24263	E5GCC5 Serine-rich protein n=1 Tax=Cucumis melo subsp. melo RepID=E5GCC5_CUCME
Glyma06g13610	Gm06:10731522-10732834	16.8871	2.62274	-2.68677	NA			Glyma03g14040	Gm03:17717205-17719589	1.95247	9.24381	2.24318	Q84U29 Zinc finger-like protein (Fragment) n=1 Tax=Phaseolus vulgaris RepID=Q84U29_PHAVU
Glyma20g00450	Gm20:235284-239639	15.6851	2.43885	-2.68513	G7IBD4 Chaperone protein dnaJ n=1 Tax=Medicago truncatula RepID=G7IBD4_MEDTR			Glyma01g44310	Gm01:55011096-55020086	0.141303	0.669409	2.2441	G7K3P8 N-acetyltransferase, putative n=1 Tax=Medicago truncatula RepID=G7K3P8_MEDTR
Glyma09g37810	Gm09:43315808-43320996	6.14782	0.956013	-2.68497	B9RCZ5 Serine/threonine protein kinase, putative n=1 Tax=Ricinus communis RepID=B9RCZ5_RICCO			Glyma07g07970	Gm07:6618206-6622661	91.8027	435.243	2.24521	B9RDP4 Remorin, putative n=1 Tax=Ricinus communis RepID=B9RDP4_RICCO
Glyma11g37480	Gm11:38568783-38573194	4.80635	0.747688	-2.68443	G7J2J3 Response regulator n=1 Tax=Medicago truncatula RepID=G7J2J3_MEDTR			Glyma06g11330	Gm06:8680411-8685706	7.61173	36.1171	2.24639	G7J458 Avr9 elicitor response protein n=2 Tax=Medicago truncatula RepID=G7J458_MEDTR
Glyma06g15300	Gm06:12062481-12063181	7.43842	1.1585	-2.68274	NA			Glyma06g14290	Gm06:11245587-11249023	9.88318	46.8971	2.24645	G7J930 NAC domain-containing protein n=1 Tax=Medicago truncatula RepID=G7J930_MEDTR
Glyma01g22990	Gm01:29393119-29399932	1.7265	0.269625	-2.67883	B9HWP3 Pho1-like protein n=1 Tax=Populus trichocarpa RepID=B9HWP3_POPTR			Glyma02g10910	Gm02:9014053-9018553	4.35187	20.6527	2.24663	Q9FX66 Endosomal targeting BRO1-like domain-containing protein n=3 Tax=Arabidopsis thaliana RepID=Q9FX66_ARATH
Glyma19g02610	Gm19:2461799-2465357	2.7484	0.429292	-2.67856	B9T6Z4 Transcription factor, putative n=1 Tax=Ricinus communis RepID=B9T6Z4_RICCO			Glyma05g28410	Gm05:34241608-34242571	8.33225	39.5734	2.24776	B9TGZ9 RALFL33, putative (Fragment) n=1 Tax=Ricinus communis RepID=B9TGZ9_RICCO
Glyma20g29640	Gm20:38501518-38502583	3.88384	0.606666	-2.67851	B9R9D8 3-hexulose-6-phosphate isomerase, putative n=1 Tax=Ricinus communis RepID=B9R9D8_RICCO			Glyma01g01400	Gm01:1018233-1021659	1.04024	4.94078	2.24782	C6ZS43 NBS-LRR type disease resistance protein n=1 Tax=Glycine max RepID=C6ZS43_SOYBN
Glyma12g01410	Gm12:842970-846738	14.0634	2.20026	-2.6762	G7ZWB7 IQ domain-containing protein n=1 Tax=Medicago truncatula RepID=G7ZWB7_MEDTR			Glyma10g31430	Gm10:39923474-39930671	6.66906	31.6902	2.24848	G7KRJ9 Aspartic proteinase-like protein n=1 Tax=Medicago truncatula RepID=G7KRJ9_MEDTR
Glyma16g29680	Gm16:33416008-33417784	5.43247	0.850094	-2.67591	B9RCH3 Metal ion binding protein, putative n=1 Tax=Ricinus communis RepID=B9RCH3_RICCO			Glyma15g08520	Gm15:6016523-6018064	4.75806	22.6107	2.24856	A2Q531 Glutaredoxin-C9 n=1 Tax=Medicago truncatula RepID=A2Q531_MEDTR
Glyma09g03270	Gm09:2299603-2301800	17.2031	2.69969	-2.67181	B9SAZ2 Reticuline oxidase, putative n=1 Tax=Ricinus communis RepID=B9SAZ2_RICCO			Glyma08g03060	Gm08:2155251-2162828	0.424849	2.01906	2.24866	Q2WGL7 Lupeol synthase n=1 Tax=Lotus japonicus RepID=Q2WGL7_LOTJA
Glyma19g00746	Gm19:465633-468679	10.0643	1.58073	-2.67058	G7KV75 Protein PLASTID MOVEMENT IMPAIRED n=1 Tax=Medicago truncatula RepID=G7KV75_MEDTR			Glyma05g31270	Gm05:36400651-36421945	11.7237	55.7949	2.25071	G7J3T2 ABC transporter D family member n=2 Tax=Medicago truncatula RepID=G7J3T2_MEDTR
Glyma07g09840	Gm07:8300011-8304001	68.5592	10.7714	-2.67014	G7KNK3 Sigma factor sigB regulation protein rsbQ n=1 Tax=Medicago truncatula RepID=G7KNK3_MEDTR			Glyma15g08860	Gm15:6264257-6266252	0.355407	1.69147	2.25073	B0EW02 Dof10 transcription factor n=1 Tax=Glycine max RepID=B0EW02_SOYBN
Glyma04g39021	Gm04:45283527-45285561	2.61273	0.412008	-2.66481	G7JBL7 U-box domain-containing protein n=1 Tax=Medicago truncatula RepID=G7JBL7_MEDTR			Glyma17g07220	Gm17:5288231-5292288	0.348504	1.65866	2.25077	G7JVH9 Xyloglucan endotransglucosylase/hydrolase n=1 Tax=Medicago truncatula RepID=G7JVH9_MEDTR
Glyma17g14470	Gm17:11201520-11203794	3.80063	0.599566	-2.66425	Q9LQ19 F16P17.2 protein n=1 Tax=Arabidopsis thaliana RepID=Q9LQ19_ARATH			Glyma10g36910	Gm10:44936439-44938818	4.3592	20.767	2.25216	Q9ST79 CAA303718.1 protein n=1 Tax=Oryza sativa RepID=Q9ST79_ORYSA
Glyma09g23600	Gm09:29114073-29115801	2.48886	0.393386	-2.66147	C6ZJB3 UGT2 n=1 Tax=Pueraria montana var. lobata RepID=C6ZJB3_PUEML			Glyma18g48330	Gm18:57767421-57769335	8.54961	40.7471	2.25277	G7KTC0 Cyclin-dependent protein kinase regulator Pho80 n=1 Tax=Medicago truncatula RepID=G7KTC0_MEDTR
Glyma17g07170	Gm17:5222675-5227433	5.30175	0.83805	-2.66136	B9N2Y9 4-Coumarate:CoA ligase n=2 Tax=Populus trichocarpa RepID=B9N2Y9_POPTR			Glyma08g08830	Gm08:6302019-6305280	1.68445	8.02955	2.25304	G7I9G1 Bloom syndrome protein-like protein n=1 Tax=Medicago truncatula RepID=G7I9G1_MEDTR
Glyma19g32850	Gm19:40547015-40551760	1.00487	0.159057	-2.6594	G7KVC1 Two-component response regulator ARR2 n=1 Tax=Medicago truncatula RepID=G7KVC1_MEDTR			Glyma02g37680	Gm02:43042725-43044203	1.78285	8.51099	2.25514	B9RJW1 DNA binding protein, putative n=1 Tax=Ricinus communis RepID=B9RJW1_RICCO
Glyma06g20810	Gm06:17210532-17211755	2.59513	0.411085	-2.6583	B9RLZ3 Transcription factor, putative n=1 Tax=Ricinus communis RepID=B9RLZ3_RICCO			Glyma11g03800	Gm11:2540526-2547500	26.2698	125.443	2.25556	I1LGS5 Acyl-coenzyme A oxidase n=1 Tax=Glycine max RepID=I1LGS5_SOYBN
Glyma01g05565	Gm01:5365957-5368432	0.726879	0.115497	-2.65386	G7KDX6 Phytochrome kinase substrate n=3 Tax=Medicago truncatula RepID=G7KDX6_MEDTR			Glyma16g29710	Gm16:33432554-33433447	5.62856	26.8962	2.25656	B9RCH3 Metal ion binding protein, putative n=1 Tax=Ricinus communis RepID=B9RCH3_RICCO
Glyma09g23123	Gm09:28473887-28480423	4.16805	0.662622	-2.65311	G7JY75 Receptor protein kinase-like protein n=1 Tax=Medicago truncatula RepID=G7JY75_MEDTR			Glyma20g23450	Gm20:33309679-33315525	0.961397	4.59586	2.25713	O49696 Aluminum-activated malate transporter 12 n=2 Tax=Arabidopsis thaliana RepID=ALMTC_ARATH
Glyma04g17330	Gm04:18806435-18810139	4.20932	0.670026	-2.6513	D7LUT4 Transcription factor n=1 Tax=Arabidopsis lyrata subsp. lyrata RepID=D7LUT4_ARALL			Glyma15g24130	Gm15:24822540-24824248	0.940755	4.50127	2.25844	C1K028 Stress induced protein n=1 Tax=Vitis vinifera RepID=C1K028_VITVI
Glyma10g39230	Gm10:46965493-46966771	21.3132	3.40244	-2.6471	NA			Glyma14g39650	Gm14:48698989-48703981	2.19176	10.4979	2.25995	Q9S791 AT1G70770 protein n=1 Tax=Arabidopsis thaliana RepID=Q9S791_ARATH
Glyma10g30370	Gm10:39044652-39045249	8.45481	1.35075	-2.64601	NA			Glyma09g33820	Gm09:40299962-40303221	3.74372	17.9464	2.26115	G7KDR3 Dihydroflavonol-4-reductase n=2 Tax=Medicago truncatula RepID=G7KDR3_MEDTR
Glyma19g05290	Gm19:5732767-5734564	8.58099	1.37122	-2.64568	Q69FA1 Anthocyanin acyltransferase n=1 Tax=Phaseolus vulgaris RepID=Q69FA1_PHAVU			Glyma17g18480	Gm17:15865431-15867630	8.51454	40.8734	2.26316	B0LUS5 Transcription factor n=1 Tax=Glycine max RepID=B0LUS5_SOYBN
Glyma12g06730	Gm12:4591540-4594075	44.2404	7.10365	-2.63873	G9FTF9 Expansin A5a n=1 Tax=Glycine max RepID=G9FTF9_SOYBN			Glyma13g42900	Gm13:42729050-42731554	0.856448	4.11363	2.26397	G7IHW4 Transcription factor bHLH87 n=1 Tax=Medicago truncatula RepID=G7IHW4_MEDTR
Glyma08g22940	Gm08:17459011-17460695	3.42022	0.549514	-2.63786	Q8H6R4 Jp18 n=1 Tax=Citrus trifoliata RepID=Q8H6R4_PONTR			Glyma04g00810	Gm04:449215-455823	5.01517	24.1077	2.26512	G7J7U7 SnRK2 calcium sensor n=1 Tax=Medicago truncatula RepID=G7J7U7_MEDTR
Glyma10g42410	Gm10:49353662-49354307	8.48338	1.36597	-2.63471	D7LY61 ATOFP13/OFP13 n=1 Tax=Arabidopsis lyrata subsp. lyrata RepID=D7LY61_ARALL			Glyma12g33240	Gm12:36577295-36579425	2.81116	13.5191	2.26576	B9RBD4 Kinase, putative n=1 Tax=Ricinus communis RepID=B9RBD4_RICCO
Glyma11g06130	Gm11:4343122-4348306	8.25201	1.3299	-2.63343	Q8RY64 AT4g37080/C7A10_280 n=2 Tax=Arabidopsis thaliana RepID=Q8RY64_ARATH			Glyma06g03200	Gm06:2252753-2257597	8.12674	39.0875	2.26596	G7I5U5 BEL1-like homeodomain protein n=1 Tax=Medicago truncatula RepID=G7I5U5_MEDTR
Glyma13g00320	Gm13:83841-86472	7.06474	1.13964	-2.63206	NA			Glyma17g06430	Gm17:4578111-4582312	3.48292	16.7712	2.26761	G7JT87 Protein kinase 2B n=1 Tax=Medicago truncatula RepID=G7JT87_MEDTR
Glyma04g33420	Gm04:39079558-39080690	9.24856	1.49357	-2.63047	NA			Glyma19g40150	Gm19:46610858-46614458	5.67344	27.3384	2.26863	E3T7S4 Dehydration-induced 19-like protein n=1 Tax=Gossypium hirsutum RepID=E3T7S4_GOSHI
Glyma06g03210	Gm06:2259293-2261928	2.0483	0.33115	-2.62887	B9R804 Bel1 homeotic protein, putative n=1 Tax=Ricinus communis RepID=B9R804_RICCO			Glyma19g41930	Gm19:48060529-48066335	1.98432	9.57082	2.27	G7KWK1 F-box/LRR-repeat protein n=1 Tax=Medicago truncatula RepID=G7KWK1_MEDTR
Glyma06g48140	Gm06:50432912-50436318	2.68844	0.435273	-2.62678	Q41012 Endo-1,4-beta-glucanase n=1 Tax=Pisum sativum RepID=Q41012_PEA			Glyma02g06050	Gm02:4844081-4847527	3.27243	15.7979	2.2713	B5A7G5 Salicylic acid methyl transferase-like protein n=1 Tax=Glycine max RepID=B5A7G5_SOYBN
Glyma19g41601	Gm19:47841199-47845702	2.53249	0.410073	-2.62661	B9RFJ9 Kelch repeat protein, putative n=1 Tax=Ricinus communis RepID=B9RFJ9_RICCO			Glyma12g16450	Gm12:15730001-15734533	8.50097	41.0548	2.27185	C6ZS29 TIR-NBS-LRR type disease resistance protein n=1 Tax=Glycine max RepID=C6ZS29_SOYBN
Glyma01g26360	Gm01:34923320-34923989	21.2003	3.4332	-2.62646	B9HC67 Copper transporter n=1 Tax=Populus trichocarpa RepID=B9HC67_POPTR			Glyma07g04940	Gm07:3647615-3653326	1.25137	6.04536	2.27232	G7L940 GDSL esterase/lipase n=1 Tax=Medicago truncatula RepID=G7L940_MEDTR
Glyma18g48210	Gm18:57692385-57697374	3.18443	0.516746	-2.62351	A2Q5W8 Actin-binding FH2 n=1 Tax=Medicago truncatula RepID=A2Q5W8_MEDTR			Glyma16g01715	Gm16:1279802-1281089	1.55108	7.49777	2.27318	G7L9W7 Ring-H2 zinc finger protein-like protein n=1 Tax=Medicago truncatula RepID=G7L9W7_MEDTR
Glyma06g48260	Gm06:50514427-50518995	46.4034	7.54296	-2.62103	G7IYF6 Cellulose synthase n=1 Tax=Medicago truncatula RepID=G7IYF6_MEDTR			Glyma05g20973	Gm05:25181038-25190341	4.13969	20.0545	2.27633	B9R772 Skip-2, putative n=1 Tax=Ricinus communis RepID=B9R772_RICCO
Glyma09g05440	Gm09:4222299-4224359	1.93653	0.314979	-2.62015	Q2LAL0 Cytochrome P450 monooxygenase CYP81E11 n=1 Tax=Glycine max RepID=Q2LAL0_SOYBN			Glyma03g26590	Gm03:34036316-34037986	6.40077	31.0424	2.27792	P93697 CPRD12 protein n=1 Tax=Vigna unguiculata RepID=P93697_VIGUN
Glyma13g04881	Gm13:5141868-5142857	4.87612	0.794309	-2.61796	G7KK02 LRR receptor-like serine/threonine-protein kinase FEI n=1 Tax=Medicago truncatula RepID=G7KK02_MEDTR			Glyma06g10990	Gm06:8367118-8370262	10.5353	51.1203	2.27866	G7KAB1 Trehalose-6-phosphate phosphatase n=2 Tax=Medicago truncatula RepID=G7KAB1_MEDTR
Glyma10g15532	Gm10:17965607-17967148	3.96449	0.648379	-2.61223	A9LRT6 3-hydroxy-3-methylglutaryl coenzyme A synthase n=1 Tax=Solanum lycopersicum RepID=A9LRT6_SOLLC			Glyma01g43280	Gm01:54324297-54328633	1.82007	8.83493	2.27922	G7KAQ3 Na+/H+ antiporter-like protein n=1 Tax=Medicago truncatula RepID=G7KAQ3_MEDTR
Glyma17g17760	Gm17:14822111-14826360	19.1538	3.13357	-2.61175	Q10IX1 Expressed protein n=2 Tax=Oryza sativa RepID=Q10IX1_ORYSJ			Glyma07g30860	Gm07:35810900-35812711	2.09292	10.1745	2.28137	G7JSV1 R2R3-MYB transcription factor n=1 Tax=Medicago truncatula RepID=G7JSV1_MEDTR
Glyma04g31220	Gm04:35438838-35449126	0.73802	0.12083	-2.61068	G7IT11 WD repeat-containing protein n=1 Tax=Medicago truncatula RepID=G7IT11_MEDTR			Glyma08g41890	Gm08:41781249-41784970	15.2957	74.3745	2.28168	C5I849 Phytoene synthase protein n=1 Tax=Fragaria x ananassa RepID=C5I849_FRAAN
Glyma14g03230	Gm14:2076272-2080446	5.32286	0.872541	-2.60891	G7K3C5 Pentatricopeptide repeat-containing protein n=1 Tax=Medicago truncatula RepID=G7K3C5_MEDTR			Glyma14g39320	Gm14:48436986-48438375	2.64181	12.8464	2.28177	NA
Glyma14g39280	Gm14:48384321-48387590	5.09386	0.836005	-2.60718	B9T5L7 Zinc finger protein, putative n=1 Tax=Ricinus communis RepID=B9T5L7_RICCO			Glyma06g06491	Gm06:4637963-4639957	2.15839	10.4972	2.28198	G7I7N3 Chorismate mutase n=3 Tax=Medicago truncatula RepID=G7I7N3_MEDTR
Glyma04g43411	Gm04:48986675-48991600	2.53105	0.415949	-2.60526	G7K933 Transcription factor TGA3 n=1 Tax=Medicago truncatula RepID=G7K933_MEDTR			Glyma01g44600	Gm01:55217750-55219793	35.7069	173.69	2.28223	G7K3S4 12-oxophytodienoate reductase n=1 Tax=Medicago truncatula RepID=G7K3S4_MEDTR
Glyma01g04107	Gm01:3570498-3572031	1.83358	0.302616	-2.5991	O04523 F20P5.5 protein n=1 Tax=Arabidopsis thaliana RepID=O04523_ARATH			Glyma05g03000	Gm05:2294762-2295930	1.42485	6.93156	2.28237	NA
Glyma14g06960	Gm14:5151678-5156640	12.3522	2.04158	-2.59701	B9SE30 Cucumisin, putative n=1 Tax=Ricinus communis RepID=B9SE30_RICCO			Glyma07g30791	Gm07:35748216-35752752	0.137286	0.668342	2.2834	Q2HTU4 Protein kinase; S-locus glycoprotein; Curculin-like (Mannose-binding) lectin; Apple-like n=1 Tax=Medicago truncatula RepID=Q2HTU4_MEDTR
Glyma11g27120	Gm11:26729749-26735141	10.7097	1.77023	-2.59692	G7JZH6 ATP-dependent Clp protease ATP-binding subunit clpL n=1 Tax=Medicago truncatula RepID=G7JZH6_MEDTR			Glyma08g08220	Gm08:5871541-5875259	1.30984	6.38202	2.28462	A4ZGU1 Transcription factor bZIP10 n=1 Tax=Glycine max RepID=A4ZGU1_SOYBN
Glyma07g34540	Gm07:39529945-39531750	4.39585	0.726677	-2.59675	G7IF99 Cytochrome P450 89A2 n=1 Tax=Medicago truncatula RepID=G7IF99_MEDTR			Glyma12g05450	Gm12:3628623-3633788	5.04239	24.5704	2.28474	E4MXZ6 mRNA, clone: RTFL01-36-E19 n=1 Tax=Eutrema halophilum RepID=E4MXZ6_THEHA
Glyma06g14315	Gm06:11268564-11274603	1.45295	0.240657	-2.59393	G7K693 Auxin-induced protein 5NG4 n=1 Tax=Medicago truncatula RepID=G7K693_MEDTR			Glyma15g18150	Gm15:14705013-14706057	2.23285	10.8832	2.28515	NA
Glyma13g35610	Gm13:37034989-37037909	1.1452	0.189911	-2.5922	G0T438 Purple acid phosphatases n=1 Tax=Glycine max RepID=G0T438_SOYBN			Glyma09g41230	Gm09:45917593-45923361	0.324563	1.58243	2.28557	G7ILM1 MAC/Perforin domain containing protein n=1 Tax=Medicago truncatula RepID=G7ILM1_MEDTR
Glyma02g38170	Gm02:43488721-43492312	2.07044	0.343381	-2.59205	G7K5Z9 Pentatricopeptide repeat-containing protein n=1 Tax=Medicago truncatula RepID=G7K5Z9_MEDTR			Glyma11g18541	Gm11:15209608-15216189	0.297868	1.45253	2.28583	C6ZGA8 Somatic embryogenesis receptor kinase n=2 Tax=Glycine max RepID=C6ZGA8_SOYBN
Glyma14g05600	Gm14:4020999-4024801	9.10467	1.51153	-2.5906	G7K7F4 IQ domain-containing protein n=1 Tax=Medicago truncatula RepID=G7K7F4_MEDTR			Glyma09g24890	Gm09:30832602-30834118	11.0345	53.8574	2.28712	Q9FF85 Emb|CAB80929.1 n=2 Tax=Arabidopsis thaliana RepID=Q9FF85_ARATH
Glyma09g07650	Gm09:6572886-6577523	17.1363	2.85895	-2.5835	A4Q9A1 Abscisic insensitive 1B n=1 Tax=Populus tremula RepID=A4Q9A1_POPTN			Glyma09g31970	Gm09:38540891-38545340	3.3712	16.4591	2.28755	G7KNK3 Sigma factor sigB regulation protein rsbQ n=1 Tax=Medicago truncatula RepID=G7KNK3_MEDTR
Glyma15g43210	Gm15:50748752-50754087	12.826	2.142	-2.58204	G7J7B0 Primary amine oxidase n=1 Tax=Medicago truncatula RepID=G7J7B0_MEDTR			Glyma04g32680	Gm04:37662390-37670904	8.01391	39.127	2.28759	B9RLR8 Leucine-rich repeat containing protein, putative n=1 Tax=Ricinus communis RepID=B9RLR8_RICCO
Glyma08g43440	Gm08:43247035-43249818	2.16432	0.361527	-2.58174	B7F1Y4 cDNA clone:002-156-B04, full insert sequence n=1 Tax=Oryza sativa Japonica Group RepID=B7F1Y4_ORYSJ			Glyma14g11960	Gm14:10543819-10545893	1.62273	7.92435	2.28787	G7I7M7 WRKY transcription factor n=1 Tax=Medicago truncatula RepID=G7I7M7_MEDTR
Glyma19g02510	Gm19:2269496-2272539	18.7832	3.13938	-2.58089	B9RUP9 Transcription regulator, putative n=1 Tax=Ricinus communis RepID=B9RUP9_RICCO			Glyma15g16115	Gm15:12422054-12422845	7.58152	37.0438	2.28867	Q5ICP0 RING-H2 subgroup RHE protein n=2 Tax=Populus tremula x Populus alba RepID=Q5ICP0_POPCN
Glyma18g17330	Gm18:18478184-18479587	16.9384	2.8333	-2.57974	G7K5L8 Two-component response regulator ARR3 n=1 Tax=Medicago truncatula RepID=G7K5L8_MEDTR			Glyma06g04510	Gm06:3167176-3170151	1.58718	7.75508	2.28868	G7J6Y7 Protein ssh4 n=1 Tax=Medicago truncatula RepID=G7J6Y7_MEDTR
Glyma03g35810	Gm03:42910925-42912325	4.24206	0.710939	-2.57697	D7LY61 ATOFP13/OFP13 n=1 Tax=Arabidopsis lyrata subsp. lyrata RepID=D7LY61_ARALL			Glyma02g44550	Gm02:49092372-49098677	7.03935	34.406	2.28915	B9SB74 Transcription factor, putative n=1 Tax=Ricinus communis RepID=B9SB74_RICCO
Glyma18g51820	Gm18:60576029-60579116	4.59656	0.770758	-2.5762	G7KSV5 LRR receptor-like serine/threonine-protein kinase FEI n=1 Tax=Medicago truncatula RepID=G7KSV5_MEDTR			Glyma05g22120	Gm05:27026862-27028472	2.95803	14.4617	2.28952	Q0PN09 Lateral organ boundaries domain protein n=1 Tax=Caragana korshinskii RepID=Q0PN09_9FABA
Glyma09g27850	Gm09:34806984-34811868	2.13705	0.358407	-2.57595	G7KMF3 Cysteine-rich receptor-like protein kinase n=1 Tax=Medicago truncatula RepID=G7KMF3_MEDTR			Glyma09g32910	Gm09:39446981-39448173	0.677005	3.31008	2.28963	G7L8N9 Ring finger protein n=1 Tax=Medicago truncatula RepID=G7L8N9_MEDTR
Glyma11g33420	Gm11:35238631-35242219	4.86271	0.815782	-2.57551	B9T5L7 Zinc finger protein, putative n=1 Tax=Ricinus communis RepID=B9T5L7_RICCO			Glyma11g07881	Gm11:5533947-5543955	11.668	57.0581	2.28987	G7KGD5 Zinc finger CCCH domain-containing protein n=1 Tax=Medicago truncatula RepID=G7KGD5_MEDTR
Glyma18g10410	Gm18:9278906-9280538	7.04512	1.18196	-2.57544	NA			Glyma13g04780	Gm13:5042962-5044480	0.955069	4.67089	2.29002	G7KJH6 Glycosyltransferase CAZy family GT8 n=1 Tax=Medicago truncatula RepID=G7KJH6_MEDTR
Glyma15g17550	Gm15:13950467-13951751	9.43212	1.58286	-2.57505	D7MC79 Transcription factor/ transcription regulator n=1 Tax=Arabidopsis lyrata subsp. lyrata RepID=D7MC79_ARALL			Glyma14g29120	Gm14:35818679-35822585	64.8139	317.015	2.29018	J3UE53 Ubiquitin-conjugating enzyme n=1 Tax=Lycoris longituba RepID=J3UE53_9ASPA
Glyma09g35190	Gm09:41370373-41373554	9.85305	1.65361	-2.57495	Q94JM4 AT4g19390/T5K18_170 n=1 Tax=Arabidopsis thaliana RepID=Q94JM4_ARATH			Glyma12g01420	Gm12:848142-851681	1.41203	6.91379	2.2917	C6F190 NBS-LRR disease-resistance protein scn3r1 n=1 Tax=Glycine max RepID=C6F190_SOYBN
Glyma08g28580	Gm08:22897744-22903507	10.9808	1.8432	-2.5747	Q9LFT0 Protein trichome birefringence-like 19 n=1 Tax=Arabidopsis thaliana RepID=Q9LFT0_ARATH			Glyma14g09130	Gm14:7131820-7138932	6.93642	33.9692	2.29196	G7I3J4 Serine/threonine protein kinase 38-like protein n=1 Tax=Medicago truncatula RepID=G7I3J4_MEDTR
Glyma10g04340	Gm10:3312004-3313936	7.40474	1.24916	-2.56749	Q6K5X1 G1-like6 protein n=2 Tax=Oryza sativa RepID=Q6K5X1_ORYSJ			Glyma09g41610	Gm09:46288824-46290029	0.919657	4.50685	2.29295	G7KVY7 Wound-induced protein n=1 Tax=Medicago truncatula RepID=G7KVY7_MEDTR
Glyma03g39030	Gm03:45253553-45258037	7.21187	1.21813	-2.5657	B9RFJ9 Kelch repeat protein, putative n=1 Tax=Ricinus communis RepID=B9RFJ9_RICCO			Glyma16g02300	Gm16:1829196-1831590	0.699667	3.43046	2.29366	NA
Glyma02g10300	Gm02:8176337-8178468	7.03474	1.18883	-2.56496	Q53NN2 Expressed protein n=2 Tax=Oryza sativa RepID=Q53NN2_ORYSJ			Glyma01g08056	Gm01:9051046-9057050	3.35833	16.476	2.29455	G7JX04 Squamosa promoter binding protein n=1 Tax=Medicago truncatula RepID=G7JX04_MEDTR
Glyma08g47200	Gm08:46116556-46119952	2.6596	0.450282	-2.56231	B9S563 Serine/threonine-protein kinase PBS1, putative n=1 Tax=Ricinus communis RepID=B9S563_RICCO			Glyma18g50000	Gm18:59266904-59269769	45.3693	222.613	2.29475	I1N4I6 UDP-glucose 6-dehydrogenase n=1 Tax=Glycine max RepID=I1N4I6_SOYBN
Glyma10g43440	Gm10:50126457-50128405	9.01207	1.52632	-2.5618	B9RGI3 DNA-binding protein MNB1B, putative n=1 Tax=Ricinus communis RepID=B9RGI3_RICCO			Glyma10g40250	Gm10:47725340-47727190	38.1369	187.154	2.29496	NA
Glyma15g19460	Gm15:16759911-16762499	2.67111	0.452587	-2.56117	G7L6U2 GRL2 n=1 Tax=Medicago truncatula RepID=G7L6U2_MEDTR			Glyma09g35530	Gm09:41564787-41565755	0.624903	3.0703	2.29668	P32295 Indole-3-acetic acid-induced protein ARG7 n=1 Tax=Vigna radiata var. radiata RepID=ARG7_VIGRR
Glyma18g07290	Gm18:5971143-5978933	378.099	64.1317	-2.55966	E4MX93 mRNA, clone: RTFL01-17-G05 n=1 Tax=Eutrema halophilum RepID=E4MX93_THEHA			Glyma14g08511	Gm14:6519658-6528628	20.3716	100.16	2.29768	NA
Glyma02g42240	Gm02:47313396-47316249	8.62209	1.46269	-2.55941	D7LNA2 Binding protein n=1 Tax=Arabidopsis lyrata subsp. lyrata RepID=D7LNA2_ARALL			Glyma02g04000	Gm02:3213789-3215161	1.78489	8.78535	2.29926	NA
Glyma17g20570	Gm17:19704044-19707014	5.26971	0.89443	-2.55868	G7KIC8 Type I inositol-1,4,5-trisphosphate 5-phosphatase n=1 Tax=Medicago truncatula RepID=G7KIC8_MEDTR			Glyma06g39810	Gm06:42754902-42757103	4.78962	23.5785	2.29949	B9SIH7 Transcription factor, putative n=1 Tax=Ricinus communis RepID=B9SIH7_RICCO
Glyma08g45281	Gm08:44722408-44723455	142.891	24.2868	-2.55667	NA			Glyma17g03230	Gm17:2155697-2157011	4.96147	24.4568	2.30139	E4MW57 mRNA, clone: RTFL01-07-K18 n=1 Tax=Eutrema halophilum RepID=E4MW57_THEHA
Glyma12g35670	Gm12:38791693-38796485	47.1898	8.03054	-2.55491	B9S960 Calmodulin, putative n=1 Tax=Ricinus communis RepID=B9S960_RICCO			Glyma06g41318	Gm06:44597513-44599625	0.357243	1.76143	2.30177	G7KHR1 Tir-nbs-lrr resistance protein n=1 Tax=Medicago truncatula RepID=G7KHR1_MEDTR
Glyma11g31995	Gm11:33294602-33297576	4.46026	0.759064	-2.55484	G7J7V4 Cysteine-rich receptor-like protein kinase n=1 Tax=Medicago truncatula RepID=G7J7V4_MEDTR			Glyma02g02820	Gm02:2121934-2129990	1.12028	5.52631	2.30246	Q0WQH3 Actin cross-linking protein n=2 Tax=Arabidopsis thaliana RepID=Q0WQH3_ARATH
Glyma16g32500	Gm16:35647926-35652132	2.6167	0.446496	-2.55103	Q01HW3 B0616E02-H0507E05.9 protein n=2 Tax=Oryza sativa RepID=Q01HW3_ORYSA			Glyma16g06750	Gm16:6064524-6071255	3.58	17.671	2.30335	Q9FKS8 Lysine histidine transporter 1 n=1 Tax=Arabidopsis thaliana RepID=LHT1_ARATH
Glyma14g36420	Gm14:45707919-45712145	44.6995	7.63113	-2.55029	I1MB34 Glutamyl-tRNA reductase n=1 Tax=Glycine max RepID=I1MB34_SOYBN			Glyma07g01660	Gm07:1086303-1090550	5.74717	28.3693	2.30341	F4HW72 Inositol oxygenase 1 n=1 Tax=Arabidopsis thaliana RepID=F4HW72_ARATH
Glyma07g14450	Gm07:13899937-13903019	1.17804	0.201421	-2.5481	NA			Glyma03g34420	Gm03:41865022-41866842	4.52408	22.3429	2.30412	Q8S9A0 Glucosyltransferase-9 n=1 Tax=Vigna angularis RepID=Q8S9A0_PHAAN
Glyma07g08031	Gm07:6667198-6678230	54.7043	9.35467	-2.54789	G7L3I8 Glutathione-regulated potassium-efflux system protein n=1 Tax=Medicago truncatula RepID=G7L3I8_MEDTR			Glyma12g35090	Gm12:38239611-38242480	7.95501	39.3313	2.30574	F4JXB6 CBS domain-containing protein n=1 Tax=Arabidopsis thaliana RepID=F4JXB6_ARATH
Glyma18g06990	Gm18:5654151-5662641	16.8197	2.8778	-2.54712	G7JZH6 ATP-dependent Clp protease ATP-binding subunit clpL n=1 Tax=Medicago truncatula RepID=G7JZH6_MEDTR			Glyma07g30350	Gm07:35354642-35357184	1.66204	8.23048	2.30802	I1KL76 Glutamyl-tRNA reductase n=1 Tax=Glycine max RepID=I1KL76_SOYBN
Glyma20g29210	Gm20:38120803-38123012	2.31497	0.396436	-2.54583	O04281 Gibberellin 20-oxidase n=1 Tax=Phaseolus vulgaris RepID=O04281_PHAVU			Glyma06g31618	Gm06:32033182-32034762	1.55753	7.72074	2.30948	G7L8D0 Chaperone protein dnaJ n=1 Tax=Medicago truncatula RepID=G7L8D0_MEDTR
Glyma07g33570	Gm07:38521607-38525243	3.91042	0.669974	-2.54515	O04840 Nitrite reductase n=1 Tax=Glycine max RepID=O04840_SOYBN			Glyma04g40780	Gm04:46742554-46743771	0.814924	4.04156	2.31018	Q9LZC0 Emb|CAB85509.1 n=1 Tax=Arabidopsis thaliana RepID=Q9LZC0_ARATH
Glyma08g28571	Gm08:22889202-22894405	10.1892	1.74867	-2.54272	NA			Glyma06g10970	Gm06:8329932-8334057	7.69256	38.1618	2.31059	G7KAB8 Small glutamine-rich tetratricopeptide repeat-containing protein n=1 Tax=Medicago truncatula RepID=G7KAB8_MEDTR
Glyma17g12140	Gm17:9178114-9180766	3.05235	0.523981	-2.54234	NA			Glyma08g47530	Gm08:46367850-46368463	1.02197	5.07105	2.31093	NA
Glyma03g07880	Gm03:8621184-8624735	8.39117	1.4415	-2.5413	G7JP31 GDSL esterase/lipase CPRD49 n=1 Tax=Medicago truncatula RepID=G7JP31_MEDTR			Glyma13g10840	Gm13:13143536-13145143	1.06125	5.26635	2.31104	Q9LIE6 Emb|CAB10291.1 n=1 Tax=Arabidopsis thaliana RepID=Q9LIE6_ARATH
Glyma06g46120	Gm06:48794459-48798484	1.25932	0.216512	-2.54012	G7JDG8 Septum-promoting GTP-binding protein n=1 Tax=Medicago truncatula RepID=G7JDG8_MEDTR			Glyma05g31200	Gm05:36368302-36371404	0.709417	3.52134	2.31142	Q4ABP5 80A08_22 n=1 Tax=Brassica rapa subsp. pekinensis RepID=Q4ABP5_BRARP
Glyma09g06810	Gm09:5608098-5612871	3.04962	0.524605	-2.53933	B5A254 Heat shock-like protein n=1 Tax=Arabidopsis thaliana RepID=B5A254_ARATH			Glyma10g02250	Gm10:1571738-1577618	4.42732	21.9934	2.31256	G7IF47 Sodium/calcium exchanger n=1 Tax=Medicago truncatula RepID=G7IF47_MEDTR
Glyma17g17470	Gm17:14324606-14330643	10.3977	1.78941	-2.5387	G7K3U5 BTB/POZ domain-containing protein n=1 Tax=Medicago truncatula RepID=G7K3U5_MEDTR			Glyma02g18320	Gm02:17021549-17027132	59.9466	298.161	2.31434	B9SLE5 Peptidase, putative n=1 Tax=Ricinus communis RepID=B9SLE5_RICCO
Glyma06g12920	Gm06:10064216-10066545	4.0403	0.695399	-2.53855	G7J670 Pleckstrin homology domain-containing protein n=1 Tax=Medicago truncatula RepID=G7J670_MEDTR			Glyma13g37000	Gm13:38200709-38201881	4.72725	23.5135	2.31441	NA
Glyma03g26796	Gm03:34314276-34318581	11.9784	2.06671	-2.53503	NA			Glyma13g33780	Gm13:35487226-35488415	21.3804	106.35	2.31447	NA
Glyma08g27960	Gm08:22212536-22215182	3.4988	0.60424	-2.53367	Q2HSF0 Pentatricopeptide repeat-containing protein n=1 Tax=Medicago truncatula RepID=Q2HSF0_MEDTR			Glyma04g03980	Gm04:2917542-2918490	2.7135	13.4979	2.3145	G7J6B0 Gibberellin receptor GID1 n=1 Tax=Medicago truncatula RepID=G7J6B0_MEDTR
Glyma01g41960	Gm01:53341813-53343059	2.65495	0.458817	-2.53269	Q6DT60 AT1G62520 (Fragment) n=1 Tax=Arabidopsis lyrata subsp. petraea RepID=Q6DT60_ARALP			Glyma06g05320	Gm06:3807135-3807622	35.3739	176.022	2.315	NA
Glyma12g36675	Gm12:39741779-39742980	6.5991	1.141	-2.53197	NA			Glyma11g34150	Gm11:36034748-36037506	0.520229	2.58902	2.31519	E5GC71 Aspartic proteinase nepenthesin-1 n=1 Tax=Cucumis melo subsp. melo RepID=E5GC71_CUCME
Glyma10g12150	Gm10:12912819-12918038	1.22353	0.211695	-2.53099	B9T2D6 DNA binding protein, putative n=1 Tax=Ricinus communis RepID=B9T2D6_RICCO			Glyma20g30700	Gm20:39416424-39418982	7.91991	39.4298	2.31573	Q9ST79 CAA303718.1 protein n=1 Tax=Oryza sativa RepID=Q9ST79_ORYSA
Glyma20g15980	Gm20:21973584-21976821	3.93026	0.681643	-2.52754	B9SF23 Catalytic, putative n=1 Tax=Ricinus communis RepID=B9SF23_RICCO			Glyma13g25600	Gm13:28816713-28825759	12.9332	64.3914	2.31579	G7J342 Membrane protein, putative n=1 Tax=Medicago truncatula RepID=G7J342_MEDTR
Glyma08g12370	Gm08:9045572-9050146	22.04	3.82501	-2.52659	B9S8B2 Glycogen synthase kinase-3 beta, putative n=2 Tax=Ricinus communis RepID=B9S8B2_RICCO			Glyma17g03030	Gm17:2026509-2029231	1.15053	5.72827	2.31579	G7JLI8 UDP-glucuronic acid decarboxylase n=1 Tax=Medicago truncatula RepID=G7JLI8_MEDTR
Glyma20g22896	Gm20:32813819-32818264	1.7457	0.303071	-2.52608	B9RFJ9 Kelch repeat protein, putative n=1 Tax=Ricinus communis RepID=B9RFJ9_RICCO			Glyma17g33940	Gm17:37858852-37862306	5.8501	29.1279	2.31587	G7I7N3 Chorismate mutase n=3 Tax=Medicago truncatula RepID=G7I7N3_MEDTR
Glyma10g42340	Gm10:49311100-49313400	2.56906	0.446535	-2.52439	Q535K6 Nitrate and chloride transporter n=1 Tax=Glycine max RepID=Q535K6_SOYBN			Glyma03g41700	Gm03:47100628-47104968	19.4215	96.9099	2.31899	G7L419 GH3 family protein n=1 Tax=Medicago truncatula RepID=G7L419_MEDTR
Glyma17g36200	Gm17:40196297-40198204	4.78809	0.833548	-2.52211	NA			Glyma15g24610	Gm15:25550955-25551911	2.75753	13.7635	2.3194	Q9FYR1 Gb|AAD20160.1 n=1 Tax=Arabidopsis thaliana RepID=Q9FYR1_ARATH
Glyma08g08270	Gm08:5912970-5918690	1.52849	0.266736	-2.51862	Q9SJV8 Expressed protein n=1 Tax=Arabidopsis thaliana RepID=Q9SJV8_ARATH			Glyma04g09110	Gm04:7264890-7270315	6.27978	31.3701	2.3206	I1JUX7 Malic enzyme n=1 Tax=Glycine max RepID=I1JUX7_SOYBN
Glyma02g37990	Gm02:43290224-43291465	22.2962	3.89185	-2.51827	P29136 Metalloendoproteinase 1 n=1 Tax=Glycine max RepID=MEP1_SOYBN			Glyma08g21910	Gm08:16668198-16671440	0.225724	1.12843	2.32168	F6LPV2 Rop guanine nucleotide exchange factor n=1 Tax=Medicago truncatula RepID=F6LPV2_MEDTR
Glyma13g32060	Gm13:34342851-34343847	6.93149	1.21548	-2.51164	Q25AA5 H0410G08.9 protein n=1 Tax=Oryza sativa RepID=Q25AA5_ORYSA			Glyma01g24945	Gm01:32870727-32871773	4.44618	22.2346	2.32217	NA
Glyma09g23170	Gm09:28538317-28540474	3.68316	0.646847	-2.50945	Q84JK8 Probable membrane-associated kinase regulator 6 n=1 Tax=Arabidopsis thaliana RepID=MAKR6_ARATH			Glyma18g02610	Gm18:1652251-1653509	15.5203	77.6794	2.32337	G7J2F7 Wound-induced protein n=2 Tax=Medicago truncatula RepID=G7J2F7_MEDTR
Glyma07g10270	Gm07:8569401-8575985	13.6266	2.39723	-2.50698	G7KN37 Chloroplastic group IIA intron splicing facilitator CRS1 n=1 Tax=Medicago truncatula RepID=G7KN37_MEDTR			Glyma10g37441	Gm10:45441620-45445716	9.88521	49.4896	2.32378	B6EBD5 SGT1-2 n=1 Tax=Glycine max RepID=B6EBD5_SOYBN
Glyma03g40420	Gm03:46182023-46184614	16.0907	2.83153	-2.50657	Q8GT20 Benzyl alcohol O-benzoyltransferase n=1 Tax=Nicotiana tabacum RepID=BEBT_TOBAC			Glyma10g31931	Gm10:40432801-40433935	1.1014	5.51573	2.32422	NA
Glyma13g00800	Gm13:512765-515892	20.0903	3.53653	-2.50609	Q10EU0 Expressed protein n=3 Tax=Oryza sativa RepID=Q10EU0_ORYSJ			Glyma11g21361	Gm11:18379852-18384992	0.106029	0.531318	2.32511	G7IW33 Resistance protein n=1 Tax=Medicago truncatula RepID=G7IW33_MEDTR
Glyma16g29420	Gm16:33224506-33241114	5.64946	0.997466	-2.50177	A6BM07 UDP-glucose:isoflavone 7-O-glucosyltransferase n=1 Tax=Glycine max RepID=A6BM07_SOYBN			Glyma10g41120	Gm10:48304758-48305885	1.03883	5.21154	2.32674	NA
Glyma12g00420	Gm12:150508-152716	8.88221	1.56921	-2.50088	B9SZ62 N-acetyltransferase, putative n=1 Tax=Ricinus communis RepID=B9SZ62_RICCO			Glyma03g06640	Gm03:6920421-6920994	6.09431	30.5858	2.32733	NA
Glyma13g04450	Gm13:4791267-4792128	7.54161	1.33443	-2.49865	NA			Glyma07g10451	Gm07:8741439-8745041	0.576705	2.90051	2.3304	NA
Glyma11g21110	Gm11:17993018-17994452	4.179	0.740939	-2.49573	G7IW97 Subtilisin inhibitor n=1 Tax=Medicago truncatula RepID=G7IW97_MEDTR			Glyma09g02430	Gm09:1622057-1627689	13.0356	65.6384	2.33209	B8XQT5 NPR1-1 protein n=1 Tax=Glycine max RepID=B8XQT5_SOYBN
Glyma08g03710	Gm08:2630926-2633769	2.32411	0.413029	-2.49236	G7LGP8 IQ domain-containing protein n=1 Tax=Medicago truncatula RepID=G7LGP8_MEDTR			Glyma16g21620	Gm16:24761976-24766102	10.9788	55.3253	2.33322	E0X6S2 3-hydroxy-3-methylglutaryl-coenzyme A reductase n=1 Tax=Glycyrrhiza uralensis RepID=E0X6S2_GLYUR
Glyma14g09420	Gm14:7482138-7484017	397.784	70.7107	-2.49199	O24323 Cysteine proteinase n=1 Tax=Phaseolus vulgaris RepID=O24323_PHAVU			Glyma03g33651	Gm03:41150788-41151667	6.11485	30.8244	2.33368	NA
Glyma05g37200	Gm05:40831938-40833145	8.39757	1.49327	-2.4915	NA			Glyma10g43800	Gm10:50366955-50369261	5.31387	26.7898	2.33385	I1LFE3 3-ketoacyl-CoA synthase n=1 Tax=Glycine max RepID=I1LFE3_SOYBN
Glyma17g07810	Gm17:5771054-5776604	3.65075	0.649692	-2.49037	E2IXG5 Somatic embryogenesis receptor kinase-like protein 1 n=1 Tax=Medicago truncatula RepID=E2IXG5_MEDTR			Glyma18g04340	Gm18:3089034-3093280	1.77032	8.92685	2.33414	C6ZRX8 Protein kinase n=1 Tax=Glycine max RepID=C6ZRX8_SOYBN
Glyma04g32420	Gm04:37096033-37098973	3.09182	0.551428	-2.48721	G7IZB2 Exocyst complex component n=1 Tax=Medicago truncatula RepID=G7IZB2_MEDTR			Glyma18g53954	Gm18:62216822-62219182	10.5841	53.3736	2.33423	B2ZGQ7 NAC domain protein n=2 Tax=Glycine max RepID=B2ZGQ7_SOYBN
Glyma10g04620	Gm10:3553029-3556958	2.61938	0.468359	-2.48353	G7KXH2 Receptor-like protein kinase n=1 Tax=Medicago truncatula RepID=G7KXH2_MEDTR			Glyma13g35470	Gm13:36872478-36874854	3.99439	20.153	2.33494	Q84WQ5 CBS domain-containing protein CBSX5 n=1 Tax=Arabidopsis thaliana RepID=CBSX5_ARATH
Glyma18g49240	Gm18:58630563-58632740	14.5226	2.59789	-2.48288	G7JQT5 Isoflavonoid malonyl transferase n=2 Tax=Medicago truncatula RepID=G7JQT5_MEDTR			Glyma08g00420	Gm08:140728-147970	4.17283	21.0734	2.33632	D2DF32 PAD4 n=1 Tax=Glycine max RepID=D2DF32_SOYBN
Glyma20g28830	Gm20:37777450-37779150	2.04455	0.367072	-2.47765	Q2V3I3 EPIDERMAL PATTERNING FACTOR-like protein 4 n=1 Tax=Arabidopsis thaliana RepID=EPFL4_ARATH			Glyma03g37490	Gm03:44090806-44092585	0.715716	3.61514	2.33659	B9SAW5 Heat shock protein binding protein, putative n=1 Tax=Ricinus communis RepID=B9SAW5_RICCO
Glyma12g23920	Gm12:26614247-26617494	13.9951	2.51534	-2.4761	B9STQ6 Purine transporter, putative n=1 Tax=Ricinus communis RepID=B9STQ6_RICCO			Glyma08g00480	Gm08:189115-193041	7.08882	35.8118	2.33682	G7LF14 Aspartic proteinase Asp1 n=1 Tax=Medicago truncatula RepID=G7LF14_MEDTR
Glyma12g03210	Gm12:2106353-2110023	96.3381	17.3751	-2.47108	P93472 Delta(24)-sterol reductase n=1 Tax=Pisum sativum RepID=DIM_PEA			Glyma04g38650	Gm04:45011613-45018499	3.36342	16.9935	2.33698	A7XVK0 Amino acid transporter n=1 Tax=Phaseolus vulgaris RepID=A7XVK0_PHAVU
Glyma10g40660	Gm10:48007243-48009898	2.74886	0.496513	-2.46893	D9ZIS1 C2H2L domain class transcription factor n=1 Tax=Malus x domestica RepID=D9ZIS1_MALDO			Glyma02g04350	Gm02:3524296-3527551	0.609273	3.0784	2.33702	D7LR71 Armadillo/beta-catenin repeat family protein n=1 Tax=Arabidopsis lyrata subsp. lyrata RepID=D7LR71_ARALL
Glyma09g27410	Gm09:34221824-34226217	2.21061	0.399673	-2.46755	Q01HW3 B0616E02-H0507E05.9 protein n=2 Tax=Oryza sativa RepID=Q01HW3_ORYSA			Glyma07g10070	Gm07:8432985-8434273	36.8446	186.407	2.33893	NA
Glyma03g30771	Gm03:38626202-38628803	2.7839	0.503332	-2.46752	A4PIS9 Isoamylase-type starch-debranching enzyme 2 n=1 Tax=Phaseolus vulgaris RepID=A4PIS9_PHAVU			Glyma17g07100	Gm17:5159887-5163931	16.185	81.9292	2.33972	G7JVG6 Syntaxin family protein n=1 Tax=Medicago truncatula RepID=G7JVG6_MEDTR
Glyma13g38531	Gm13:39330656-39338769	7.2079	1.30371	-2.46696	A2Q4I2 Arogenate dehydratase/prephenate dehydratase n=2 Tax=Medicago truncatula RepID=A2Q4I2_MEDTR			Glyma02g37020	Gm02:42348788-42350865	11.2625	57.0618	2.341	B9SQF3 UDP-glucuronate 5-epimerase, putative n=1 Tax=Ricinus communis RepID=B9SQF3_RICCO
Glyma04g40640	Gm04:46630389-46635618	119.246	21.5787	-2.46626	G7J905 Two-component response regulator-like PRR73 n=2 Tax=Medicago truncatula RepID=G7J905_MEDTR			Glyma18g02850	Gm18:1859751-1864988	3.52084	17.8516	2.34206	G7JBX2 Ser-thr protein kinase n=1 Tax=Medicago truncatula RepID=G7JBX2_MEDTR
Glyma18g53230	Gm18:61533603-61534729	3.67855	0.666196	-2.46512	Q9LF08 50S ribosomal protein-like protein n=1 Tax=Arabidopsis thaliana RepID=Q9LF08_ARATH			Glyma13g04000	Gm13:4224686-4225600	4.00806	20.3232	2.34215	Q94JV8 AT2g04793 n=1 Tax=Arabidopsis thaliana RepID=Q94JV8_ARATH
Glyma19g00730	Gm19:461478-462164	4.1797	0.758544	-2.4621	B9RBF6 DNA binding protein, putative n=1 Tax=Ricinus communis RepID=B9RBF6_RICCO			Glyma20g25990	Gm20:35585027-35586265	3.44274	17.4624	2.34263	B7FA06 cDNA, clone: J100026I16, full insert sequence n=2 Tax=Oryza sativa Japonica Group RepID=B7FA06_ORYSJ
Glyma10g04110	Gm10:3114269-3117981	4.67761	0.849895	-2.46041	Q7X7L0 OSJNBa0001M07.6 protein n=2 Tax=Oryza sativa Japonica Group RepID=Q7X7L0_ORYSJ			Glyma01g03870	Gm01:3327064-3332585	8.42343	42.7793	2.34443	B9S4L7 Trehalose-6-phosphate synthase, putative n=1 Tax=Ricinus communis RepID=B9S4L7_RICCO
Glyma02g16430	Gm02:14830640-14835890	2.6253	0.477132	-2.46002	G7IDM2 Type I inositol-1,4,5-trisphosphate 5-phosphatase n=1 Tax=Medicago truncatula RepID=G7IDM2_MEDTR			Glyma09g27120	Gm09:33833455-33835174	0.259602	1.31885	2.34491	G7IAR1 Multidrug and toxin extrusion protein n=1 Tax=Medicago truncatula RepID=G7IAR1_MEDTR
Glyma11g14460	Gm11:10320991-10325189	24.1166	4.38564	-2.45916	Q0WWW9 D-xylose-proton symporter-like 3, chloroplastic n=1 Tax=Arabidopsis thaliana RepID=XYLL3_ARATH			Glyma13g39160	Gm13:39862730-39865553	0.591735	3.01169	2.34755	G7IHF4 NAC domain protein n=1 Tax=Medicago truncatula RepID=G7IHF4_MEDTR
Glyma09g03840	Gm09:2771285-2771955	6.81759	1.24034	-2.45852	NA			Glyma04g05480	Gm04:4144999-4149937	1.76641	8.99359	2.34808	G7J7N8 ADP/ATP translocase-like protein n=1 Tax=Medicago truncatula RepID=G7J7N8_MEDTR
Glyma10g05600	Gm10:4390604-4397865	8.17663	1.49017	-2.45603	G7L1Q0 Leucine-rich repeat receptor-like protein kinase n=1 Tax=Medicago truncatula RepID=G7L1Q0_MEDTR			Glyma11g07441	Gm11:5230972-5232763	0.4838	2.46486	2.34902	G7KEX6 RCC1 and BTB domain-containing protein n=1 Tax=Medicago truncatula RepID=G7KEX6_MEDTR
Glyma17g13780	Gm17:10559743-10568955	11.044	2.01415	-2.45502	G7J5I7 Ribonuclease J n=1 Tax=Medicago truncatula RepID=G7J5I7_MEDTR			Glyma20g24840	Gm20:34488162-34491196	1.7955	9.15616	2.35036	Q8L7U7 AT4g39670/T19P19_60 n=1 Tax=Arabidopsis thaliana RepID=Q8L7U7_ARATH
Glyma20g35520	Gm20:43811538-43815051	6.0215	1.09823	-2.45494	G7KMY7 Receptor-like protein kinase n=1 Tax=Medicago truncatula RepID=G7KMY7_MEDTR			Glyma06g34940	Gm06:36668157-36673471	2.70301	13.7981	2.35183	Q9M6U1 Homogentisate 1,2-dioxygenase (Fragment) n=1 Tax=Solanum lycopersicum RepID=Q9M6U1_SOLLC
Glyma13g04360	Gm13:4702023-4706600	2.2177	0.404801	-2.45378	B9RUD0 Auxin-induced protein 5NG4, putative n=1 Tax=Ricinus communis RepID=B9RUD0_RICCO			Glyma09g24751	Gm09:30524051-30527919	5.20589	26.576	2.35191	NA
Glyma14g10620	Gm14:8823481-8830995	243.567	44.5429	-2.45105	O24325 Vacuolar-processing enzyme n=1 Tax=Phaseolus vulgaris RepID=VPE1_PHAVU			Glyma03g37530	Gm03:44130385-44134042	5.40629	27.6081	2.35238	E3T7S4 Dehydration-induced 19-like protein n=1 Tax=Gossypium hirsutum RepID=E3T7S4_GOSHI
Glyma13g28580	Gm13:31573829-31574573	7.07346	1.29397	-2.45061	NA			Glyma05g35940	Gm05:39886879-39888139	4.73867	24.1989	2.35239	Q9LVB9 Emb|CAB83157.1 n=1 Tax=Arabidopsis thaliana RepID=Q9LVB9_ARATH
Glyma12g34230	Gm12:37411264-37411903	9.01484	1.64994	-2.44989	NA			Glyma10g36980	Gm10:45022880-45025563	7.67411	39.2016	2.35284	B9T2G9 Transcription factor, putative n=1 Tax=Ricinus communis RepID=B9T2G9_RICCO
Glyma07g09060	Gm07:7536303-7539851	4.1668	0.763478	-2.44828	G7LCR0 Cysteine-rich receptor-like protein kinase n=1 Tax=Medicago truncatula RepID=G7LCR0_MEDTR			Glyma04g05320	Gm04:4051965-4055582	7.86385	40.2063	2.35412	I1JTV8 Ferrochelatase n=1 Tax=Glycine max RepID=I1JTV8_SOYBN
Glyma18g32310	Gm18:37682622-37684479	2.56882	0.471216	-2.44664	B9SQ09 Myosin heavy chain, putative n=1 Tax=Ricinus communis RepID=B9SQ09_RICCO			Glyma06g16970	Gm06:13344347-13347591	0.595634	3.04841	2.35556	G7J2Q2 GDSL esterase/lipase n=1 Tax=Medicago truncatula RepID=G7J2Q2_MEDTR
Glyma13g18021	Gm13:21681170-21685035	2.32716	0.426948	-2.44644	A0MP01 Mitochondrial pyruvate dehydrogenase E1alpha-kinase 3 n=1 Tax=Glycine max RepID=A0MP01_SOYBN			Glyma15g01100	Gm15:669586-671028	3.58909	18.3778	2.35627	NA
Glyma17g04840	Gm17:3244216-3246403	8.66206	1.5915	-2.44433	G7L3A7 Protein CREG1 n=1 Tax=Medicago truncatula RepID=G7L3A7_MEDTR			Glyma11g04610	Gm11:3131956-3136270	1.3605	6.9672	2.35644	B9S1G5 DNA binding protein, putative n=1 Tax=Ricinus communis RepID=B9S1G5_RICCO
Glyma09g27230	Gm09:33997137-33998958	25.1397	4.62071	-2.44378	UPI000200156A hypothetical protein SCB01_07295 n=1 Tax=Synechococcus sp. CB0101 RepID=UPI000200156A			Glyma12g30270	Gm12:33908815-33910973	1.78796	9.16249	2.35743	G7JN94 ZPT2-11 n=1 Tax=Medicago truncatula RepID=G7JN94_MEDTR
Glyma17g34160	Gm17:38024157-38027577	11.8097	2.17078	-2.44369	C6ZRW0 Lectin-like receptor kinase n=1 Tax=Glycine max RepID=C6ZRW0_SOYBN			Glyma02g36810	Gm02:42234048-42238413	1.44589	7.41036	2.35758	NA
Glyma13g35915	Gm13:37289948-37293960	1.89968	0.349296	-2.44323	G7IZ18 Serine/threonine protein kinase n=1 Tax=Medicago truncatula RepID=G7IZ18_MEDTR			Glyma08g26520	Gm08:20855110-20858024	59.9785	307.652	2.35878	Q96558 UDP-glucose 6-dehydrogenase n=1 Tax=Glycine max RepID=UGDH_SOYBN
Glyma14g39530	Gm14:48621584-48624007	8.31359	1.53224	-2.43983	G7K1N8 P-type R2R3 Myb protein n=1 Tax=Medicago truncatula RepID=G7K1N8_MEDTR			Glyma06g43641	Gm06:46653764-46659451	0.112069	0.574889	2.3589	C6K8D1 Seed biotinylated protein 68 kDa isoform n=1 Tax=Glycine max RepID=C6K8D1_SOYBN
Glyma09g35000	Gm09:41241750-41246496	7.46656	1.37658	-2.43935	F4KD53 Major facilitator protein n=1 Tax=Arabidopsis thaliana RepID=F4KD53_ARATH			Glyma08g40620	Gm08:40357592-40365378	5.54988	28.474	2.35912	Q0WQH3 Actin cross-linking protein n=2 Tax=Arabidopsis thaliana RepID=Q0WQH3_ARATH
Glyma02g00640	Gm02:431820-445394	7.2493	1.33721	-2.43861	G7IJI7 Pho1-like protein n=1 Tax=Medicago truncatula RepID=G7IJI7_MEDTR			Glyma08g08820	Gm08:6286754-6288989	3.63701	18.6686	2.35979	G7I9G1 Bloom syndrome protein-like protein n=1 Tax=Medicago truncatula RepID=G7I9G1_MEDTR
Glyma03g04000	Gm03:3949790-3953999	5.09539	0.941607	-2.436	B9RD58 DNA binding protein, putative n=1 Tax=Ricinus communis RepID=B9RD58_RICCO			Glyma03g24600	Gm03:31507751-31514684	44.1413	226.602	2.35996	I1JMI6 Adenylate kinase 6 n=1 Tax=Glycine max RepID=I1JMI6_SOYBN
Glyma15g26330	Gm15:28098689-28102462	6.39447	1.18218	-2.43537	B9SC16 Receptor protein kinase CLAVATA1, putative n=1 Tax=Ricinus communis RepID=B9SC16_RICCO			Glyma06g14910	Gm06:11699744-11700797	0.94385	4.84845	2.36089	NA
Glyma18g13540	Gm18:13032464-13039200	11.818	2.18874	-2.43281	B9SSI9 Zinc finger protein, putative n=1 Tax=Ricinus communis RepID=B9SSI9_RICCO			Glyma20g28000	Gm20:36969796-36973965	2.0576	10.5762	2.36179	F4IVV0 ROP-interactive CRIB motif-containing protein 1 n=1 Tax=Arabidopsis thaliana RepID=F4IVV0_ARATH
Glyma02g30670	Gm02:32711339-32716829	1.5576	0.288695	-2.43171	A2Q4T4 SBP n=2 Tax=Medicago truncatula RepID=A2Q4T4_MEDTR			Glyma02g07950	Gm02:6263862-6265368	3.57332	18.376	2.36248	Q9FK55 Emb|CAB87627.1 n=1 Tax=Arabidopsis thaliana RepID=Q9FK55_ARATH
Glyma09g09220	Gm09:8851768-8858989	106.862	19.8077	-2.43162	G7JQ40 Solute carrier family 35 member C2 n=1 Tax=Medicago truncatula RepID=G7JQ40_MEDTR			Glyma09g13170	Gm09:14483183-14486066	7.62766	39.2394	2.36299	B9T2N3 Regulatory protein uhpC, putative n=1 Tax=Ricinus communis RepID=B9T2N3_RICCO
Glyma01g45040	Gm01:55464916-55466082	2.07174	0.384775	-2.42876	Q6NMR8 Protein FANTASTIC FOUR 3 n=1 Tax=Arabidopsis thaliana RepID=FAF3_ARATH			Glyma09g09070	Gm09:8576720-8581710	9.32702	47.9837	2.36306	A2Q3Z1 Tac7077, putative n=1 Tax=Medicago truncatula RepID=A2Q3Z1_MEDTR
Glyma12g01890	Gm12:1148694-1151384	14.1324	2.62667	-2.4277	I0B672 PLATZ n=1 Tax=Gossypium hirsutum RepID=I0B672_GOSHI			Glyma05g01890	Gm05:1357078-1360058	0.28273	1.45479	2.36332	B9RB51 Spermidine synthase 1, putative n=1 Tax=Ricinus communis RepID=B9RB51_RICCO
Glyma18g05110	Gm18:3859627-3862485	14.406	2.67838	-2.42724	G7J7Y4 2-succinylbenzoate-CoA ligase n=1 Tax=Medicago truncatula RepID=G7J7Y4_MEDTR			Glyma18g42730	Gm18:52006688-52010635	1.13374	5.83558	2.36378	C6ZRZ7 Leucine-rich repeat family protein / protein kinase family protein n=1 Tax=Glycine max RepID=C6ZRZ7_SOYBN
Glyma08g45230	Gm08:44651854-44657338	2.80536	0.521591	-2.42719	B9SI02 Cdc6, putative n=1 Tax=Ricinus communis RepID=B9SI02_RICCO			Glyma18g46990	Gm18:56649324-56653934	3.69575	19.0233	2.36383	G7LBQ0 RING finger protein n=1 Tax=Medicago truncatula RepID=G7LBQ0_MEDTR
Glyma11g32390	Gm11:34009937-34017374	5.80367	1.07955	-2.42653	G7J7V5 Cysteine-rich receptor-like protein kinase n=1 Tax=Medicago truncatula RepID=G7J7V5_MEDTR			Glyma17g32980	Gm17:36500307-36506891	6.51468	33.5413	2.36417	A5Y4G8 Class II KNOX homeobox transcription factor n=1 Tax=Medicago truncatula RepID=A5Y4G8_MEDTR
Glyma20g28720	Gm20:37644316-37649639	3.60019	0.670553	-2.42465	B9RTM3 5-methyltetrahydrofolate:homocysteine methyltransferase, putative n=1 Tax=Ricinus communis RepID=B9RTM3_RICCO			Glyma18g50840	Gm18:59856261-59862758	1.03782	5.34446	2.36449	C6ZRZ6 Disease resistance protein n=1 Tax=Glycine max RepID=C6ZRZ6_SOYBN
Glyma03g38640	Gm03:44943758-44948193	10.7939	2.01113	-2.42415	Q2HRU3 Peptide transporter PTR1 n=1 Tax=Medicago truncatula RepID=Q2HRU3_MEDTR			Glyma18g02630	Gm18:1669189-1670782	0.431565	2.2241	2.36557	D7LYD7 Metal ion binding protein n=1 Tax=Arabidopsis lyrata subsp. lyrata RepID=D7LYD7_ARALL
Glyma07g05760	Gm07:4435615-4436701	27.9683	5.21111	-2.42413	G7L527 Auxin-induced protein X15 n=1 Tax=Medicago truncatula RepID=G7L527_MEDTR			Glyma07g17240	Gm07:16961688-16966452	12.3741	63.7826	2.36584	E4MY40 mRNA, clone: RTFL01-30-M01 n=1 Tax=Eutrema halophilum RepID=E4MY40_THEHA
Glyma06g44930	Gm06:47735127-47739089	5.87522	1.09553	-2.42301	H9TN46 Expansin B protein n=1 Tax=Glycine max RepID=H9TN46_SOYBN			Glyma15g01990	Gm15:1306382-1308714	0.755568	3.89609	2.36639	Q2HU50 Cornifelin-like protein n=1 Tax=Medicago truncatula RepID=Q2HU50_MEDTR
Glyma13g20470	Gm13:23922546-23924569	9.9283	1.85152	-2.42284	Q9SZL6 AT4g38160/F20D10_280 n=1 Tax=Arabidopsis thaliana RepID=Q9SZL6_ARATH			Glyma04g10560	Gm04:8761024-8766010	2.81662	14.5261	2.36661	G7J4H4 Protein TRANSPARENT TESTA n=1 Tax=Medicago truncatula RepID=G7J4H4_MEDTR
Glyma01g37541	Gm01:49879281-49885195	25.8416	4.82331	-2.4216	I1J8Q0 Beta-galactosidase n=1 Tax=Glycine max RepID=I1J8Q0_SOYBN			Glyma17g07740	Gm17:5729125-5731278	18.5	95.4426	2.36711	B9SQF3 UDP-glucuronate 5-epimerase, putative n=1 Tax=Ricinus communis RepID=B9SQF3_RICCO
Glyma18g20610	Gm18:22640349-22644049	3.0342	0.566349	-2.42155	B9SPI4 Heme-binding protein, putative n=1 Tax=Ricinus communis RepID=B9SPI4_RICCO			Glyma12g07100	Gm12:4836346-4840415	2.88649	14.9001	2.36794	G7JTP9 Auxin-regulated protein n=1 Tax=Medicago truncatula RepID=G7JTP9_MEDTR
Glyma15g43021	Gm15:50461554-50471143	7.65912	1.4329	-2.41825	C1IIX2 Ferric reductase defective 3a n=1 Tax=Glycine max RepID=C1IIX2_SOYBN			Glyma16g17190	Gm16:18531360-18538322	109.764	566.79	2.36841	Q41695 Pectinacetylesterase n=1 Tax=Vigna radiata var. radiata RepID=Q41695_VIGRR
Glyma03g28590	Gm03:36521417-36526547	3.13207	0.586387	-2.41719	G7KRP1 Adipocyte plasma membrane-associated protein n=1 Tax=Medicago truncatula RepID=G7KRP1_MEDTR			Glyma01g38980	Gm01:50956636-50960580	25.3588	131.104	2.37015	G7K9E0 L-ascorbate oxidase-like protein n=1 Tax=Medicago truncatula RepID=G7K9E0_MEDTR
Glyma13g19630	Gm13:23106815-23108594	5.42481	1.01701	-2.41524	G7L1N2 Metal ion binding protein n=1 Tax=Medicago truncatula RepID=G7L1N2_MEDTR			Glyma16g27880	Gm16:31827463-31830563	11.4176	59.0927	2.37172	H2D7G8 Glutathione peroxidase n=1 Tax=Copaifera officinalis RepID=H2D7G8_9FABA
Glyma07g09150	Gm07:7617918-7628850	1.30603	0.245219	-2.41305	G7ZXN0 Cytochrome P450 monooxygenase CYP704G7 n=2 Tax=Medicago truncatula RepID=G7ZXN0_MEDTR			Glyma15g10600	Gm15:7696568-7698186	0.392307	2.03119	2.37227	NA
Glyma19g38351	Gm19:45268728-45275946	10.1079	1.89834	-2.41268	B9SX01 Lysosomal pro-X carboxypeptidase, putative n=1 Tax=Ricinus communis RepID=B9SX01_RICCO			Glyma04g02900	Gm04:2097831-2102269	13.5031	69.9298	2.37261	G7J4P3 1-acylglycerol-3-phosphate O-acyltransferase ABHD5 n=1 Tax=Medicago truncatula RepID=G7J4P3_MEDTR
Glyma19g41230	Gm19:47533374-47538270	7.33644	1.37828	-2.41221	Q2HRU3 Peptide transporter PTR1 n=1 Tax=Medicago truncatula RepID=Q2HRU3_MEDTR			Glyma17g03910	Gm17:2554549-2555923	15.9763	82.9301	2.37596	Q9SWP6 Hypersensitive reaction associated Ca2+-binding protein n=1 Tax=Phaseolus vulgaris RepID=Q9SWP6_PHAVU
Glyma02g46980	Gm02:50755714-50757335	27.3628	5.14367	-2.41135	G7KEF3 Ycf60-like protein n=1 Tax=Medicago truncatula RepID=G7KEF3_MEDTR			Glyma09g32120	Gm09:38683396-38684350	51.9318	269.581	2.37603	NA
Glyma10g03411	Gm10:2460501-2465726	1.95149	0.367145	-2.41016	G7IDM2 Type I inositol-1,4,5-trisphosphate 5-phosphatase n=1 Tax=Medicago truncatula RepID=G7IDM2_MEDTR			Glyma10g26183	Gm10:34330946-34331888	2.79116	14.4902	2.37614	NA
Glyma12g34960	Gm12:38067576-38071034	1.64717	0.310003	-2.40964	G0T438 Purple acid phosphatases n=1 Tax=Glycine max RepID=G0T438_SOYBN			Glyma05g21220	Gm05:25744985-25746795	4.32661	22.486	2.37772	Q0PJL4 MYB transcription factor MYB61 n=1 Tax=Glycine max RepID=Q0PJL4_SOYBN
Glyma05g26030	Gm05:32045468-32048512	3.63695	0.684961	-2.40864	B9S130 Dopamine beta-monooxygenase, putative n=1 Tax=Ricinus communis RepID=B9S130_RICCO			Glyma06g47750	Gm06:50154435-50158689	13.0467	67.8993	2.37971	G7IYK7 Glucan 1,3-beta-glucosidase n=1 Tax=Medicago truncatula RepID=G7IYK7_MEDTR
Glyma17g01930	Gm17:1192359-1193955	8.24252	1.55336	-2.4077	NA			Glyma14g34590	Gm14:43188431-43190367	6.29462	32.7597	2.37973	I1SZ67 Dehydration-responsive element binding protein n=1 Tax=Lespedeza potaninii RepID=I1SZ67_9FABA
Glyma01g39530	Gm01:51483951-51489283	171.759	32.4334	-2.40484	G7K5B0 Inosine-5'-monophosphate dehydrogenase n=1 Tax=Medicago truncatula RepID=G7K5B0_MEDTR			Glyma20g09810	Gm20:13608090-13616257	24.1191	125.645	2.38111	Q02909 Phosphoenolpyruvate carboxylase, housekeeping isozyme n=2 Tax=Glycine max RepID=CAPP1_SOYBN
Glyma07g05110	Gm07:3783360-3784826	13.0538	2.46676	-2.40378	Q94HC7 Expressed protein n=1 Tax=Oryza sativa Japonica Group RepID=Q94HC7_ORYSJ			Glyma02g04840	Gm02:3955362-3956579	2.73786	14.2707	2.38193	NA
Glyma09g08440	Gm09:7685884-7687037	6.01387	1.13739	-2.40257	NA			Glyma20g33531	Gm20:42117681-42122352	0.193428	1.00843	2.38224	B9SU29 ATP binding protein, putative n=1 Tax=Ricinus communis RepID=B9SU29_RICCO
Glyma19g41630	Gm19:47866524-47867701	6.28365	1.18912	-2.4017	B9A9Z1 Nicotianamine synthase n=1 Tax=Lotus japonicus RepID=B9A9Z1_LOTJA			Glyma18g52650	Gm18:61203297-61206577	0.447112	2.3375	2.38626	D2D321 Heat shock protein 70 n=1 Tax=Gossypium hirsutum RepID=D2D321_GOSHI
Glyma15g16000	Gm15:12337019-12338452	3.61624	0.685179	-2.39994	Q01L40 H0502B11.11 protein n=3 Tax=Oryza sativa RepID=Q01L40_ORYSA			Glyma03g37360	Gm03:43998345-43999515	0.432963	2.26388	2.38649	Q9LZJ6 RING-H2 finger protein ATL5 n=2 Tax=Arabidopsis thaliana RepID=ATL5_ARATH
Glyma17g08660	Gm17:6394740-6398087	5.42271	1.02791	-2.3993	B9RLN2 Replication factor A 1, rfa1, putative n=1 Tax=Ricinus communis RepID=B9RLN2_RICCO			Glyma01g02180	Gm01:1688059-1691046	21.5276	112.654	2.38764	I0B672 PLATZ n=1 Tax=Gossypium hirsutum RepID=I0B672_GOSHI
Glyma16g28070	Gm16:31995296-31996638	686.859	130.267	-2.39855	Q43437 Photosystem II type I chlorophyll a/b-binding protein n=1 Tax=Glycine max RepID=Q43437_SOYBN			Glyma15g18991	Gm15:15934277-15939489	15.5788	81.5558	2.3882	Q9SKI2 Vacuolar protein sorting-associated protein 2 homolog 1 n=2 Tax=Arabidopsis RepID=VPS2A_ARATH
Glyma01g02215	Gm01:1735229-1736763	161.774	30.6975	-2.39778	NA			Glyma05g35050	Gm05:39182781-39185064	1.56084	8.17109	2.38821	Q0PJK4 MYB transcription factor MYB84 n=1 Tax=Glycine max RepID=Q0PJK4_SOYBN
Glyma05g03980	Gm05:3075803-3080587	3.89135	0.739149	-2.39633	Q9LQ19 F16P17.2 protein n=1 Tax=Arabidopsis thaliana RepID=Q9LQ19_ARATH			Glyma01g02950	Gm01:2448362-2450139	11.6781	61.1371	2.38824	B9SXH6 Mitochondrial dicarboxylate carrier protein, putative n=1 Tax=Ricinus communis RepID=B9SXH6_RICCO
Glyma11g20250	Gm11:17082668-17083514	3.63913	0.691765	-2.39524	NA			Glyma20g36180	Gm20:44384842-44396320	10.09	52.8981	2.39029	B9S4F4 ATP binding protein, putative n=1 Tax=Ricinus communis RepID=B9S4F4_RICCO
Glyma01g44430	Gm01:55100324-55103507	6.49141	1.23463	-2.39445	I0B672 PLATZ n=1 Tax=Gossypium hirsutum RepID=I0B672_GOSHI			Glyma11g18460	Gm11:15112878-15115743	2.02281	10.6076	2.39066	B9SCZ3 Ccr4-associated factor, putative n=1 Tax=Ricinus communis RepID=B9SCZ3_RICCO
Glyma07g15850	Gm07:15553569-15556706	10.7621	2.04852	-2.39331	Q4VPE6 Phantastica transcription factor a n=1 Tax=Glycine max RepID=Q4VPE6_SOYBN			Glyma11g34250	Gm11:36113225-36120641	0.265134	1.39057	2.39088	B9SDZ0 ESC, putative n=1 Tax=Ricinus communis RepID=B9SDZ0_RICCO
Glyma03g36450	Gm03:43398681-43401207	3.55535	0.679114	-2.38827	G7LEE7 Ubiquitin carboxyl-terminal hydrolase family protein n=1 Tax=Medicago truncatula RepID=G7LEE7_MEDTR			Glyma06g06310	Gm06:4519858-4524350	1.8648	9.78316	2.39128	G7J977 Protein phosphatase 2C n=1 Tax=Medicago truncatula RepID=G7J977_MEDTR
Glyma04g32002	Gm04:36451981-36456753	8.07445	1.54335	-2.3873	B9RLK6 LIGULELESS1 protein, putative n=1 Tax=Ricinus communis RepID=B9RLK6_RICCO			Glyma08g09940	Gm08:7114976-7117895	9.89831	51.9506	2.39189	C0IRI3 Xyloglucan endotransglucosylase/hydrolase 10 n=1 Tax=Malus x domestica RepID=C0IRI3_MALDO
Glyma03g34530	Gm03:41943568-41945889	4.6528	0.889611	-2.38685	D6MKH3 Transcription factor n=1 Tax=Lycoris longituba RepID=D6MKH3_9ASPA			Glyma17g03300	Gm17:2195857-2198733	0.443041	2.32566	2.39213	B9RTB3 Polygalacturonase, putative n=1 Tax=Ricinus communis RepID=B9RTB3_RICCO
Glyma17g09770	Gm17:7269444-7273013	4.80051	0.918773	-2.38541	G7JPT4 Fibroblast growth factor receptor n=1 Tax=Medicago truncatula RepID=G7JPT4_MEDTR			Glyma06g11880	Gm06:9187155-9189154	2.7574	14.4842	2.3931	NA
Glyma17g36060	Gm17:40043016-40047980	4.88222	0.934905	-2.38464	Q8L8T7 Cold regulated protein 27 n=1 Tax=Arabidopsis thaliana RepID=Q8L8T7_ARATH			Glyma07g32120	Gm07:37008660-37012235	16.5119	86.8265	2.39463	B3TLS9 Fiber protein Fb2 n=1 Tax=Elaeis guineensis RepID=B3TLS9_ELAGV
Glyma17g11220	Gm17:8424776-8430480	4.62063	0.885245	-2.38394	B3GNI3 Minichromosome maintenance 5 protein n=1 Tax=Pisum sativum RepID=B3GNI3_PEA			Glyma20g29330	Gm20:38228046-38229928	0.510436	2.68553	2.3954	G7IC21 TCP family transcription factor n=1 Tax=Medicago truncatula RepID=G7IC21_MEDTR
Glyma05g02121	Gm05:1544028-1546361	18.8929	3.62028	-2.38367	D7MMX2 Phosphoglycerate/bisphosphoglycerate mutase family protein n=1 Tax=Arabidopsis lyrata subsp. lyrata RepID=D7MMX2_ARALL			Glyma12g05080	Gm12:3396410-3397822	0.981898	5.1661	2.39543	NA
Glyma03g35030	Gm03:42354555-42363837	2.11506	0.405351	-2.38346	G7L5Z3 ABC transporter G family member n=1 Tax=Medicago truncatula RepID=G7L5Z3_MEDTR			Glyma20g24860	Gm20:34504616-34506172	5.73222	30.2126	2.39799	NA
Glyma11g07550	Gm11:5290143-5296775	1.63474	0.313609	-2.38202	B9S6D7 Auxilin, putative n=1 Tax=Ricinus communis RepID=B9S6D7_RICCO			Glyma03g28360	Gm03:36253216-36254217	11.2305	59.2245	2.39877	O80669 Sigma factor binding protein 2, chloroplastic n=1 Tax=Arabidopsis thaliana RepID=SIB2_ARATH
Glyma01g42050	Gm01:53408079-53410652	2.68328	0.515145	-2.38095	B9RBQ5 ODORANT1 protein, putative n=1 Tax=Ricinus communis RepID=B9RBQ5_RICCO			Glyma01g31320	Gm01:42162374-42164312	2.53611	13.3832	2.39974	G7JKP6 Abscisic acid receptor PYL4 n=1 Tax=Medicago truncatula RepID=G7JKP6_MEDTR
Glyma04g02800	Gm04:2017941-2019842	4.6563	0.895726	-2.37805	B9R864 ATRAD3, putative n=1 Tax=Ricinus communis RepID=B9R864_RICCO			Glyma11g20030	Gm11:16846077-16848107	6.61068	34.8858	2.39977	B9SCH8 Metal ion binding protein, putative n=1 Tax=Ricinus communis RepID=B9SCH8_RICCO
Glyma01g35540	Gm01:48012025-48020478	6.77811	1.3045	-2.37739	F6LPV3 Rop guanine nucleotide exchange factor n=2 Tax=Medicago truncatula RepID=F6LPV3_MEDTR			Glyma01g39000	Gm01:50968054-50971842	6.0008	31.6988	2.4012	G7K838 Cc-nbs-lrr resistance protein n=1 Tax=Medicago truncatula RepID=G7K838_MEDTR
Glyma06g07270	Gm06:5286022-5287667	248.837	47.918	-2.37656	D7LRE2 Bundle-sheath defective protein 2 family n=1 Tax=Arabidopsis lyrata subsp. lyrata RepID=D7LRE2_ARALL			Glyma20g27160	Gm20:36369928-36371518	47.5108	251.053	2.40167	Q8L8M2 Adhesive/proline-rich protein homolog n=1 Tax=Arabidopsis thaliana RepID=Q8L8M2_ARATH
Glyma15g11220	Gm15:8223538-8227989	1.19869	0.231365	-2.37322	Q5BPJ0 Expressed protein n=1 Tax=Arabidopsis thaliana RepID=Q5BPJ0_ARATH			Glyma05g26960	Gm05:32843600-32846768	9.2773	49.0257	2.40176	B9SNH8 Xyloglucan endotransglucosylase/hydrolase protein 2, putative n=1 Tax=Ricinus communis RepID=B9SNH8_RICCO
Glyma19g34960	Gm19:42557788-42561603	113.825	22.0151	-2.37025	B5WWZ9 Long-chain-alcohol oxidase FAO2 n=1 Tax=Lotus japonicus RepID=FAO2_LOTJA			Glyma09g06041	Gm09:4795004-4796504	0.586301	3.09835	2.40178	Q9FFM1 Ankyrin repeat family protein n=1 Tax=Arabidopsis thaliana RepID=Q9FFM1_ARATH
Glyma12g36460	Gm12:39516952-39524227	2.77197	0.536562	-2.3691	B9H0U7 Chromatin remodeling complex subunit (Fragment) n=1 Tax=Populus trichocarpa RepID=B9H0U7_POPTR			Glyma15g42490	Gm15:49919881-49920574	1.54388	8.16398	2.40271	NA
Glyma09g28190	Gm09:35193055-35197053	8.28952	1.60545	-2.36831	G7KMY7 Receptor-like protein kinase n=1 Tax=Medicago truncatula RepID=G7KMY7_MEDTR			Glyma18g18921	Gm18:20443485-20444621	1.17109	6.19734	2.4038	NA
Glyma02g38280	Gm02:43664447-43668322	43.141	8.35607	-2.36816	I1JH44 Glutamyl-tRNA reductase n=1 Tax=Glycine max RepID=I1JH44_SOYBN			Glyma07g38300	Gm07:43080538-43088184	0.189534	1.00304	2.40385	G7JJ08 Pyrimidine-specific ribonucleoside hydrolase rihB n=1 Tax=Medicago truncatula RepID=G7JJ08_MEDTR
Glyma06g46590	Gm06:49176879-49178100	5.62926	1.09226	-2.36562	G7IVT6 RADIALIS n=1 Tax=Medicago truncatula RepID=G7IVT6_MEDTR			Glyma09g28490	Gm09:35443911-35448415	7.71287	40.8233	2.40405	G7L6E5 4,5-DOPA dioxygenase extradiol-like protein n=1 Tax=Medicago truncatula RepID=G7L6E5_MEDTR
Glyma17g16520	Gm17:13230858-13237105	30.5509	5.93052	-2.36499	Q9LS22 Aluminum-activated malate transporter 14 n=1 Tax=Arabidopsis thaliana RepID=ALMTE_ARATH			Glyma17g35530	Gm17:39520698-39522605	115.886	613.785	2.40502	B9R733 GAST1 protein, putative n=1 Tax=Ricinus communis RepID=B9R733_RICCO
Glyma14g10940	Gm14:9144887-9149382	19.7461	3.83694	-2.36354	Q2HVE6 Zinc finger, C2H2-type n=1 Tax=Medicago truncatula RepID=Q2HVE6_MEDTR			Glyma09g31450	Gm09:38144555-38149999	0.697915	3.69701	2.40523	Q9C9T2 Calmodulin binding protein-like protein n=2 Tax=Arabidopsis thaliana RepID=Q9C9T2_ARATH
Glyma01g35620	Gm01:48132072-48139955	14.6797	2.85293	-2.3633	G7K421 GMC-type oxidoreductase, putative n=1 Tax=Medicago truncatula RepID=G7K421_MEDTR			Glyma08g29470	Gm08:23928439-23931080	1.85356	9.82049	2.4055	Q53RJ8 Expressed protein n=2 Tax=Oryza sativa RepID=Q53RJ8_ORYSJ
Glyma05g28810	Gm05:34565922-34568220	4.71489	0.916326	-2.36329	G7LHY8 Neutral amino acid transport protein n=1 Tax=Medicago truncatula RepID=G7LHY8_MEDTR			Glyma19g33381	Gm19:41020725-41021969	9.37956	49.7069	2.40585	G7I2T6 Gibberellic acid receptor-b n=1 Tax=Medicago truncatula RepID=G7I2T6_MEDTR
Glyma05g34236	Gm05:38620540-38622232	3.1995	0.622052	-2.36274	NA			Glyma16g09850	Gm16:9715074-9717517	0.300275	1.59289	2.40729	G7LEF2 Serine/threonine protein kinase OXI1 n=1 Tax=Medicago truncatula RepID=G7LEF2_MEDTR
Glyma09g33610	Gm09:40049277-40050343	3.32717	0.647604	-2.36111	G7KF59 Hydroxyproline-rich glycoprotein n=2 Tax=Medicago truncatula RepID=G7KF59_MEDTR			Glyma09g05960	Gm09:4737217-4745507	1.19837	6.3658	2.40927	Q9M396 Ankyrin repeat-containing protein n=1 Tax=Arabidopsis thaliana RepID=Q9M396_ARATH
Glyma06g41170	Gm06:44455598-44457907	37.9575	7.39144	-2.36046	Q9FIV1 Gb|AAF02153.1 n=1 Tax=Arabidopsis thaliana RepID=Q9FIV1_ARATH			Glyma18g05840	Gm18:4483115-4491382	3.31398	17.6111	2.40985	B9SD76 Transcription factor, putative n=1 Tax=Ricinus communis RepID=B9SD76_RICCO
Glyma09g34120	Gm09:40560461-40566517	1.02132	0.19897	-2.35981	G7KCB2 Abhydrolase domain-containing protein FAM108C1 n=1 Tax=Medicago truncatula RepID=G7KCB2_MEDTR			Glyma11g19550	Gm11:16310127-16313304	101.201	538.257	2.41107	D2D333 UDP-D-apiose/UPD-D-xylose synthetase n=1 Tax=Gossypium hirsutum RepID=D2D333_GOSHI
Glyma10g41030	Gm10:48230220-48233002	6.36854	1.24441	-2.3555	B9SYJ7 Chloroplast-targeted copper chaperone, putative n=1 Tax=Ricinus communis RepID=B9SYJ7_RICCO			Glyma20g24580	Gm20:34216076-34218180	9.45945	50.3156	2.41118	NA
Glyma05g36650	Gm05:40467739-40469213	25.6747	5.02398	-2.35344	NA			Glyma06g12260	Gm06:9448445-9453862	9.67141	51.458	2.4116	B9S2V6 Signal peptidase I, putative n=1 Tax=Ricinus communis RepID=B9S2V6_RICCO
Glyma15g13430	Gm15:10045252-10047079	8.77029	1.71793	-2.35195	G7L1B0 Tyrosine/dopa decarboxylase n=1 Tax=Medicago truncatula RepID=G7L1B0_MEDTR			Glyma11g08020	Gm11:5657921-5659811	18.6334	99.1418	2.4116	G7JW51 GDP-mannose 4 6-dehydratase n=1 Tax=Medicago truncatula RepID=G7JW51_MEDTR
Glyma05g25910	Gm05:31967309-31971849	65.7224	12.8978	-2.34926	Q8YSS1 All3013 protein n=1 Tax=Nostoc sp. PCC 7120 RepID=Q8YSS1_NOSS1			Glyma17g36921	Gm17:40841786-40843580	1.13348	6.03673	2.41301	Q0PJF4 MYB transcription factor MYB97 (Fragment) n=1 Tax=Glycine max RepID=Q0PJF4_SOYBN
Glyma02g36740	Gm02:42158210-42164122	7.392	1.45279	-2.34714	NA			Glyma13g40030	Gm13:40591012-40594198	14.575	77.7379	2.41512	G7IRU1 Auxin response factor n=1 Tax=Medicago truncatula RepID=G7IRU1_MEDTR
Glyma10g35531	Gm10:43774455-43775171	14.5377	2.86046	-2.34548	NA			Glyma18g01100	Gm18:554866-559554	1.61247	8.60537	2.41596	B9RMF7 ELMO domain-containing protein, putative n=1 Tax=Ricinus communis RepID=B9RMF7_RICCO
Glyma12g34550	Gm12:37723594-37725641	571.212	112.407	-2.34529	Q06765 ADR6 protein n=2 Tax=Glycine max RepID=Q06765_SOYBN			Glyma09g31070	Gm09:37818415-37820921	11.2885	60.2946	2.41717	Q7XST6 OSJNBa0039K24.20 protein n=2 Tax=Oryza sativa Japonica Group RepID=Q7XST6_ORYSJ
Glyma04g41880	Gm04:47704612-47707129	4.63489	0.912613	-2.34446	G7J670 Pleckstrin homology domain-containing protein n=1 Tax=Medicago truncatula RepID=G7J670_MEDTR			Glyma07g10541	Gm07:8802804-8814519	2.29807	12.2758	2.41733	G7KMN1 Kinase R-like protein n=1 Tax=Medicago truncatula RepID=G7KMN1_MEDTR
Glyma17g35130	Gm17:39128792-39130600	5.96348	1.17513	-2.34333	NA			Glyma12g11270	Gm12:9341664-9343344	0.44219	2.36246	2.41755	NA
Glyma18g38150	Gm18:45522950-45523388	10.0798	1.98691	-2.34287	NA			Glyma10g08540	Gm10:7432598-7434358	2.37682	12.7135	2.41925	Q53LU7 Expressed protein n=1 Tax=Oryza sativa Japonica Group RepID=Q53LU7_ORYSJ
Glyma17g07470	Gm17:5470842-5472998	4.38824	0.866517	-2.34034	A5AD54 Glutamate receptor n=1 Tax=Vitis vinifera RepID=A5AD54_VITVI			Glyma17g14750	Gm17:11501467-11506188	42.7542	228.702	2.41933	P29001 Acid beta-fructofuranosidase n=2 Tax=Vigna radiata RepID=INVA_VIGRR
Glyma20g30311	Gm20:38980015-38985616	2.81957	0.556889	-2.34001	G7IDX9 Membrane protein, putative n=1 Tax=Medicago truncatula RepID=G7IDX9_MEDTR			Glyma20g34420	Gm20:42802639-42807326	5.77652	30.9723	2.4227	B9HUB6 Ethylene receptor 2 n=1 Tax=Populus trichocarpa RepID=B9HUB6_POPTR
Glyma03g31210	Gm03:39125665-39128147	3.89387	0.769243	-2.33969	G7IDN1 Senescence-associated protein SAG102 n=1 Tax=Medicago truncatula RepID=G7IDN1_MEDTR			Glyma06g00990	Gm06:581154-584681	19.3987	104.094	2.42385	I1K723 Arginine decarboxylase n=1 Tax=Glycine max RepID=I1K723_SOYBN
Glyma06g46340	Gm06:48987250-48988468	19.9431	3.94428	-2.33806	G7JDK7 Aquaporin SIP1-1 n=1 Tax=Medicago truncatula RepID=G7JDK7_MEDTR			Glyma10g00620	Gm10:373005-378316	0.456912	2.45197	2.42395	B6SSP0 Neurogenic locus notch protein-like n=1 Tax=Zea mays RepID=B6SSP0_MAIZE
Glyma15g06190	Gm15:4378040-4382091	9.57311	1.89392	-2.33761	G7IPM3 Root phototropism protein n=1 Tax=Medicago truncatula RepID=G7IPM3_MEDTR			Glyma13g37543	Gm13:38595288-38599366	15.9924	85.8305	2.4241	B9RW43 Peroxisomal membrane protein, putative n=1 Tax=Ricinus communis RepID=B9RW43_RICCO
Glyma11g12520	Gm11:8928611-8931559	1.64092	0.32469	-2.33737	G7JG65 mTERF domain-containing protein n=1 Tax=Medicago truncatula RepID=G7JG65_MEDTR			Glyma17g35190	Gm17:39200984-39202033	0.495607	2.66067	2.42452	Q75KB0 Expressed protein n=1 Tax=Oryza sativa Japonica Group RepID=Q75KB0_ORYSJ
Glyma19g01430	Gm19:1056948-1060338	45.6969	9.05741	-2.33493	B9RUD0 Auxin-induced protein 5NG4, putative n=1 Tax=Ricinus communis RepID=B9RUD0_RICCO			Glyma04g37640	Gm04:44007036-44013428	5.0909	27.3375	2.42489	Q949N7 AT3G26890 protein n=1 Tax=Arabidopsis thaliana RepID=Q949N7_ARATH
Glyma16g28030	Gm16:31968062-31969194	310.419	61.5678	-2.33397	Q43437 Photosystem II type I chlorophyll a/b-binding protein n=1 Tax=Glycine max RepID=Q43437_SOYBN			Glyma19g03476	Gm19:3491701-3494911	10.1323	54.4094	2.4249	G7KLT7 Membrane-anchored ubiquitin-fold protein n=1 Tax=Medicago truncatula RepID=G7KLT7_MEDTR
Glyma03g03520	Gm03:3298596-3301223	252.741	50.1383	-2.33368	Q2LAL4 Cytochrome P450 monooxygenase CYP83E8 n=1 Tax=Glycine max RepID=Q2LAL4_SOYBN			Glyma13g31390	Gm13:33804823-33806363	18.5286	99.6166	2.42663	G7IPR9 REF/SRPP-like protein n=1 Tax=Medicago truncatula RepID=G7IPR9_MEDTR
Glyma13g31530	Gm13:33947323-33949037	5.90241	1.1709	-2.33368	G7IPQ5 Lactosylceramide 4-alpha-galactosyltransferase n=1 Tax=Medicago truncatula RepID=G7IPQ5_MEDTR			Glyma14g00550	Gm14:270270-273193	3.85753	20.7486	2.42726	I7APL7 UDP-glycosyltransferase 82A1-like protein n=1 Tax=Phaseolus vulgaris RepID=I7APL7_PHAVU
Glyma08g10410	Gm08:7540119-7544933	6.75789	1.34162	-2.3326	G7IGM5 Carbohydrate transporter/sugar porter n=1 Tax=Medicago truncatula RepID=G7IGM5_MEDTR			Glyma02g35240	Gm02:39964753-39973279	2.77743	14.9456	2.4279	G7I8I8 ATP-dependent RNA helicase Dhx29 n=1 Tax=Medicago truncatula RepID=G7I8I8_MEDTR
Glyma19g00620	Gm19:394160-396496	11.83	2.35028	-2.33155	B9S665 Acetylglucosaminyltransferase, putative n=1 Tax=Ricinus communis RepID=B9S665_RICCO			Glyma20g06680	Gm20:9022940-9027020	0.30971	1.66832	2.4294	G7JH45 Nudix hydrolase n=1 Tax=Medicago truncatula RepID=G7JH45_MEDTR
Glyma03g29740	Gm03:37783228-37787184	5.1602	1.0277	-2.32801	B9T7Q3 ATP binding protein, putative n=1 Tax=Ricinus communis RepID=B9T7Q3_RICCO			Glyma06g14100	Gm06:11128881-11129356	1.72465	9.29234	2.42974	NA
Glyma14g38830	Gm14:48014049-48017820	12.5879	2.51207	-2.32509	Q93ZA9 AT4G10360 protein n=1 Tax=Arabidopsis thaliana RepID=Q93ZA9_ARATH			Glyma03g37150	Gm03:43868155-43869474	0.490476	2.64397	2.43045	G7LBZ1 Alpha-1 6-xylosyltransferase n=1 Tax=Medicago truncatula RepID=G7LBZ1_MEDTR
Glyma13g29630	Gm13:32502780-32506373	9.36377	1.86917	-2.32469	G7L7C0 Interferon-induced GTP-binding protein Mx n=1 Tax=Medicago truncatula RepID=G7L7C0_MEDTR			Glyma02g38510	Gm02:43904312-43911773	5.10164	27.5109	2.43097	G7K650 Integral membrane protein-like protein n=1 Tax=Medicago truncatula RepID=G7K650_MEDTR
Glyma19g01880	Gm19:1499556-1505085	6.02129	1.2022	-2.32439	G7KJG0 Peptide transporter family n=1 Tax=Medicago truncatula RepID=G7KJG0_MEDTR			Glyma18g51741	Gm18:60526240-60534001	1.97056	10.6289	2.43132	B9N1L5 BED finger-nbs-lrr resistance protein n=1 Tax=Populus trichocarpa RepID=B9N1L5_POPTR
Glyma01g36301	Gm01:48784769-48791019	8.29637	1.65657	-2.32428	Q10S87 Expressed protein n=1 Tax=Oryza sativa Japonica Group RepID=Q10S87_ORYSJ			Glyma04g00460	Gm04:238357-239853	1.5168	8.18239	2.4315	G7KNM6 Short-chain alcohol dehydrogenase n=1 Tax=Medicago truncatula RepID=G7KNM6_MEDTR
Glyma06g03250	Gm06:2286288-2287757	4.80968	0.962792	-2.32064	Q0GPI2 BZIP transcription factor bZIP44 n=2 Tax=Glycine max RepID=Q0GPI2_SOYBN			Glyma08g29050	Gm08:23460213-23465361	2.37476	12.8237	2.43296	C6F190 NBS-LRR disease-resistance protein scn3r1 n=1 Tax=Glycine max RepID=C6F190_SOYBN
Glyma10g11910	Gm10:12447536-12451502	4.27131	0.856072	-2.31887	Q9M2R0 Anthranilate phosphoribosyltransferase-like protein n=1 Tax=Arabidopsis thaliana RepID=Q9M2R0_ARATH			Glyma08g42850	Gm08:42814224-42819950	9.83726	53.1267	2.43311	O24431 Calmodulin-like domain protein kinase isoenzyme gamma n=1 Tax=Glycine max RepID=O24431_SOYBN
Glyma03g23960	Gm03:30624443-30627106	52.9208	10.6099	-2.31842	B9SDD2 Calcium ion binding protein, putative n=1 Tax=Ricinus communis RepID=B9SDD2_RICCO			Glyma19g34270	Gm19:41894543-41899441	0.785179	4.24408	2.43436	Q2R165 Expressed protein n=1 Tax=Oryza sativa Japonica Group RepID=Q2R165_ORYSJ
Glyma10g40010	Gm10:47556264-47560328	10.1273	2.03251	-2.31692	C6ZRS0 Receptor-like protein kinase n=1 Tax=Glycine max RepID=C6ZRS0_SOYBN			Glyma17g14080	Gm17:10836054-10838461	3.72466	20.1382	2.43475	B9R9G5 Protein binding protein, putative n=1 Tax=Ricinus communis RepID=B9R9G5_RICCO
Glyma18g05260	Gm18:3981487-3986528	2.02021	0.40563	-2.31627	G7J7V5 Cysteine-rich receptor-like protein kinase n=1 Tax=Medicago truncatula RepID=G7J7V5_MEDTR			Glyma04g41820	Gm04:47655506-47657062	1.48596	8.03836	2.43551	G7J659 Protein MKS1 n=1 Tax=Medicago truncatula RepID=G7J659_MEDTR
Glyma13g23410	Gm13:26817856-26821562	35.1461	7.06706	-2.31418	G7JHS4 DNA-binding protein phosphatase 2C n=1 Tax=Medicago truncatula RepID=G7JHS4_MEDTR			Glyma14g11870	Gm14:10402094-10405358	7.59864	41.1409	2.43676	G7I7N3 Chorismate mutase n=3 Tax=Medicago truncatula RepID=G7I7N3_MEDTR
Glyma14g33800	Gm14:42035457-42040919	8.92801	1.79564	-2.31384	G7K933 Transcription factor TGA3 n=1 Tax=Medicago truncatula RepID=G7K933_MEDTR			Glyma13g00280	Gm13:41066-43023	6.53105	35.3629	2.43685	Q8GTJ0 Xyloglucan endotransglucosylase/hydrolase 2 n=1 Tax=Malus x domestica RepID=Q8GTJ0_MALDO
Glyma11g03270	Gm11:2157965-2161663	3.40522	0.684998	-2.31358	G7KG73 Receptor-like protein kinase n=1 Tax=Medicago truncatula RepID=G7KG73_MEDTR			Glyma01g35370	Gm01:47876579-47879048	4.08423	22.1213	2.4373	G7K6R0 Zinc finger and SCAN domain-containing protein n=1 Tax=Medicago truncatula RepID=G7K6R0_MEDTR
Glyma10g01910	Gm10:1365661-1366973	43.5577	8.77151	-2.31203	NA			Glyma13g31850	Gm13:34204657-34209152	5.39384	29.237	2.43841	G7ILG2 PAP-specific phosphatase HAL2-like protein n=1 Tax=Medicago truncatula RepID=G7ILG2_MEDTR
Glyma04g33880	Gm04:39657332-39660017	8.60785	1.7361	-2.30981	B9R985 Protein HVA22, putative n=1 Tax=Ricinus communis RepID=B9R985_RICCO			Glyma15g02750	Gm15:1904644-1911312	3.72662	20.2018	2.43855	I1MCY9 Beta-galactosidase n=1 Tax=Glycine max RepID=I1MCY9_SOYBN
Glyma20g02850	Gm20:2500302-2505282	1.24696	0.25182	-2.30795	G7JIR8 LOB domain-containing protein n=1 Tax=Medicago truncatula RepID=G7JIR8_MEDTR			Glyma10g39010	Gm10:46750469-46753817	2.62089	14.2234	2.44014	B6SSP0 Neurogenic locus notch protein-like n=1 Tax=Zea mays RepID=B6SSP0_MAIZE
Glyma13g04221	Gm13:4562880-4566145	2.2852	0.461623	-2.30753	B6D7P2 Malate O-hydroxycinnamoyl transferase n=1 Tax=Trifolium pratense RepID=B6D7P2_TRIPR			Glyma16g32080	Gm16:35274146-35275762	0.420181	2.28088	2.44051	B3SN57 Brother of FT and TFL1 protein n=1 Tax=Glycine max RepID=B3SN57_SOYBN
Glyma02g45280	Gm02:49607325-49612822	9.69794	1.95928	-2.30736	G7K3A2 Acetyltransferase, putative n=1 Tax=Medicago truncatula RepID=G7K3A2_MEDTR			Glyma03g32610	Gm03:40331559-40332921	1.50756	8.18399	2.44059	B6T5M3 Enzyme of the cupin superfamily n=1 Tax=Zea mays RepID=B6T5M3_MAIZE
Glyma10g36810	Gm10:44881550-44884202	7.45591	1.50699	-2.30671	Q9LPU4 T22I11.8 n=1 Tax=Arabidopsis thaliana RepID=Q9LPU4_ARATH			Glyma04g01130	Gm04:710034-711409	309.965	1682.8	2.44069	D3YBF7 Dehydrin b n=1 Tax=Trifolium repens RepID=D3YBF7_TRIRP
Glyma10g23750	Gm10:30283734-30288399	5.475	1.10673	-2.30655	Q9C581 Core-2/I-branching beta-1,6-N-acetylglucosaminyltransferase family protein n=2 Tax=Arabidopsis thaliana RepID=Q9C581_ARATH			Glyma02g40320	Gm02:45555892-45557816	2.46189	13.3686	2.44101	G7K0V4 Ethylene-responsive transcription factor 1A n=1 Tax=Medicago truncatula RepID=G7K0V4_MEDTR
Glyma20g37410	Gm20:45317010-45319985	1.01363	0.205422	-2.30286	A2Q3G0 Chaperone protein dnaJ n=1 Tax=Medicago truncatula RepID=A2Q3G0_MEDTR			Glyma02g42800	Gm02:47771975-47775977	3.01827	16.3932	2.4413	G7K7B8 Sodium-coupled neutral amino acid transporter n=1 Tax=Medicago truncatula RepID=G7K7B8_MEDTR
Glyma09g37680	Gm09:43198402-43202099	8.44106	1.7117	-2.302	P46602 Homeobox-leucine zipper protein HAT3 n=1 Tax=Arabidopsis thaliana RepID=HAT3_ARATH			Glyma11g02370	Gm11:1503704-1506734	0.460838	2.50578	2.44293	G7KC02 Meiotic recombination protein SPO11-2 n=1 Tax=Medicago truncatula RepID=G7KC02_MEDTR
Glyma12g33430	Gm12:36699837-36704400	29.5791	6.00124	-2.30124	B9RVT6 DNA binding protein, putative n=1 Tax=Ricinus communis RepID=B9RVT6_RICCO			Glyma05g04520	Gm05:3662880-3665552	10.2534	55.7563	2.44304	I1K0N7 L-lactate dehydrogenase n=1 Tax=Glycine max RepID=I1K0N7_SOYBN
Glyma10g28781	Gm10:37635574-37640832	2.82937	0.574056	-2.30122	B9RFJ9 Kelch repeat protein, putative n=1 Tax=Ricinus communis RepID=B9RFJ9_RICCO			Glyma08g21300	Gm08:16173150-16177636	1.88419	10.2485	2.44339	F4HW72 Inositol oxygenase 1 n=1 Tax=Arabidopsis thaliana RepID=F4HW72_ARATH
Glyma01g01570	Gm01:1165649-1171110	10.3536	2.10174	-2.30047	B9RTA9 Triacylglycerol lipase, putative n=1 Tax=Ricinus communis RepID=B9RTA9_RICCO			Glyma18g49360	Gm18:58733794-58736013	3.46243	18.8977	2.44835	E4W6I5 Transcription factor MYB392 n=1 Tax=Glycine max RepID=E4W6I5_SOYBN
Glyma06g12890	Gm06:10050919-10052793	88.0199	17.8717	-2.30015	Q9ZV96 F9K20.18 protein n=2 Tax=Arabidopsis thaliana RepID=Q9ZV96_ARATH			Glyma02g14021	Gm02:12377370-12379156	0.576254	3.14633	2.44889	NA
Glyma18g48450	Gm18:57848244-57850258	14.2213	2.88937	-2.29923	Q2L8W8 MTERF-like protein n=1 Tax=Brassica napus RepID=Q2L8W8_BRANA			Glyma06g42950	Gm06:46235245-46239928	7.60779	41.5463	2.44917	NA
Glyma18g07010	Gm18:5703309-5708093	4.14901	0.843771	-2.29784	Q9LML4 F10K1.7 protein n=1 Tax=Arabidopsis thaliana RepID=Q9LML4_ARATH			Glyma20g03395	Gm20:3193135-3197948	2.58133	14.0996	2.44947	Q7Y1G8 Expressed protein n=2 Tax=Oryza sativa RepID=Q7Y1G8_ORYSJ
Glyma13g36320	Gm13:37597120-37598430	19.4825	3.96454	-2.29695	NA			Glyma11g04950	Gm11:3448461-3453309	1.42236	7.77622	2.45078	G7K2F4 ACT domain-containing protein n=1 Tax=Medicago truncatula RepID=G7K2F4_MEDTR
Glyma14g37190	Gm14:46458422-46461741	10.3781	2.11202	-2.29685	G7K6E4 Dehydrodolichyl diphosphate synthase n=1 Tax=Medicago truncatula RepID=G7K6E4_MEDTR			Glyma13g24520	Gm13:27872961-27878734	0.659155	3.60529	2.45143	Q9SGN6 MACPF domain-containing protein NSL1 n=1 Tax=Arabidopsis thaliana RepID=NSL1_ARATH
Glyma18g38340	Gm18:45749302-45750530	3.09311	0.629482	-2.29682	B9S558 Zinc finger protein, putative n=1 Tax=Ricinus communis RepID=B9S558_RICCO			Glyma02g03830	Gm02:3062469-3070242	7.29103	39.8838	2.45161	G7K1F4 Potassium transporter n=1 Tax=Medicago truncatula RepID=G7K1F4_MEDTR
Glyma08g22360	Gm08:17012377-17017508	5.67685	1.15561	-2.29644	G7IMG6 Epoxide hydrolase n=2 Tax=Medicago truncatula RepID=G7IMG6_MEDTR			Glyma13g32430	Gm13:34607869-34609388	7.25587	39.7211	2.45269	G7IK21 Regulator of ribonuclease-like protein n=1 Tax=Medicago truncatula RepID=G7IK21_MEDTR
Glyma11g09560	Gm11:6831270-6834888	9.61645	1.95791	-2.29619	G7K406 ABC transporter-like protein n=1 Tax=Medicago truncatula RepID=G7K406_MEDTR			Glyma03g42390	Gm03:47630168-47631689	1.08365	5.94052	2.45469	G7L9W6 RING-H2 finger protein ATL3C n=2 Tax=Medicago truncatula RepID=G7L9W6_MEDTR
Glyma07g23736	Gm07:25841648-25848842	7.78535	1.58593	-2.29543	G7IA05 U-box domain-containing protein n=1 Tax=Medicago truncatula RepID=G7IA05_MEDTR			Glyma09g07560	Gm09:6461856-6463606	8.59907	47.1502	2.45501	B6CAM2 Matrix metalloproteinase n=1 Tax=Glycine max RepID=B6CAM2_SOYBN
Glyma15g15370	Gm15:11792571-11799367	7.58151	1.545	-2.29487	G7IMV1 Beta xylosidase n=1 Tax=Medicago truncatula RepID=G7IMV1_MEDTR			Glyma01g01860	Gm01:1432595-1439227	5.13262	28.1672	2.45625	G7KCC8 Lysine-specific demethylase 5B n=1 Tax=Medicago truncatula RepID=G7KCC8_MEDTR
Glyma19g32590	Gm19:40339526-40343314	2.84445	0.579908	-2.29425	B9T7Q3 ATP binding protein, putative n=1 Tax=Ricinus communis RepID=B9T7Q3_RICCO			Glyma10g38101	Gm10:45974958-45976993	0.896596	4.92267	2.45691	Q9LTJ4 Vesicle transport protein SEC22 n=1 Tax=Arabidopsis thaliana RepID=Q9LTJ4_ARATH
Glyma04g35835	Gm04:42302977-42311141	12.8157	2.61338	-2.29392	J0LI97 Outer membrane autotransporter n=1 Tax=Pontibacter sp. BAB1700 RepID=J0LI97_9BACT			Glyma05g34960	Gm05:39122839-39126820	44.4958	244.387	2.45743	G4XSW3 JAZ3 n=1 Tax=Vitis rupestris RepID=G4XSW3_9ROSI
Glyma13g23470	Gm13:26867650-26870360	40.7704	8.31726	-2.29334	F4K464 Tetratricopeptide repeat domain-containing protein n=1 Tax=Arabidopsis thaliana RepID=F4K464_ARATH			Glyma06g22760	Gm06:19515688-19517433	1.63939	9.00517	2.4576	G3E7M9 Annexin n=2 Tax=Glycine max RepID=G3E7M9_SOYBN
Glyma16g17090	Gm16:18355088-18361869	3.29523	0.672248	-2.29331	F6LPV3 Rop guanine nucleotide exchange factor n=2 Tax=Medicago truncatula RepID=F6LPV3_MEDTR			Glyma20g26790	Gm20:36140067-36141467	1.76593	9.70083	2.45768	Q9LH40 Gb|AAF18723.1 n=2 Tax=Arabidopsis thaliana RepID=Q9LH40_ARATH
Glyma08g21980	Gm08:16711163-16716089	15.2859	3.12427	-2.29061	G7II33 BY-inesin-like protein n=1 Tax=Medicago truncatula RepID=G7II33_MEDTR			Glyma17g33130	Gm17:36813825-36815487	3.21857	17.6831	2.45788	D9ZIS4 C2H2L domain class transcription factor n=1 Tax=Malus x domestica RepID=D9ZIS4_MALDO
Glyma02g45570	Gm02:49784812-49785281	17.0573	3.49454	-2.28722	Q9FQZ1 Avr9/Cf-9 rapidly elicited protein 180 n=1 Tax=Nicotiana tabacum RepID=Q9FQZ1_TOBAC			Glyma01g26220	Gm01:34484074-34486309	8.94802	49.2126	2.45939	D8UY87 Glutathione S-transferase n=1 Tax=Glycine soja RepID=D8UY87_GLYSO
Glyma05g27970	Gm05:33841547-33844197	2.8421	0.582937	-2.28555	B9GMJ2 Cytochrome P450 n=1 Tax=Populus trichocarpa RepID=B9GMJ2_POPTR			Glyma08g44031	Gm08:43775609-43776479	3.30722	18.1994	2.4602	NA
Glyma02g29610	Gm02:31460432-31464858	1.66137	0.340794	-2.28541	B9T7Q3 ATP binding protein, putative n=1 Tax=Ricinus communis RepID=B9T7Q3_RICCO			Glyma15g11680	Gm15:8605738-8608639	6.35904	34.998	2.46039	A7LHG6 WRKY23 (Fragment) n=1 Tax=Glycine max RepID=A7LHG6_SOYBN
Glyma13g18291	Gm13:21946526-21950232	2.77809	0.571303	-2.28177	Q9M1S9 CDT1-like protein b n=1 Tax=Arabidopsis thaliana RepID=CDT1B_ARATH			Glyma03g41120	Gm03:46645701-46650460	7.6714	42.2476	2.46131	B9S7K5 L-allo-threonine aldolase, putative n=1 Tax=Ricinus communis RepID=B9S7K5_RICCO
Glyma11g04820	Gm11:3303452-3305722	25.9095	5.33137	-2.2809	E3UZI7 Xyloglucan endotransglucosylase/hydrolase n=1 Tax=Gossypium hirsutum RepID=E3UZI7_GOSHI			Glyma07g36430	Gm07:41820900-41823758	0.375441	2.06809	2.46164	G7IL36 Myb-like transcription factor n=1 Tax=Medicago truncatula RepID=G7IL36_MEDTR
Glyma19g02520	Gm19:2306076-2316572	15.5188	3.19329	-2.2809	B9RUP8 Multidrug resistance protein 1, 2, putative n=1 Tax=Ricinus communis RepID=B9RUP8_RICCO			Glyma01g00930	Gm01:585699-587056	8.94873	49.2981	2.46178	Q9LVB9 Emb|CAB83157.1 n=1 Tax=Arabidopsis thaliana RepID=Q9LVB9_ARATH
Glyma09g06290	Gm09:5054660-5055945	8.1521	1.67781	-2.28059	D7MC79 Transcription factor/ transcription regulator n=1 Tax=Arabidopsis lyrata subsp. lyrata RepID=D7MC79_ARALL			Glyma04g41760	Gm04:47625553-47627662	4.92366	27.1601	2.46369	G7J684 Myosin heavy chain IB n=1 Tax=Medicago truncatula RepID=G7J684_MEDTR
Glyma01g02400	Gm01:1969464-1975586	35.1839	7.25267	-2.27833	A9YWR4 Glycine-rich protein n=1 Tax=Medicago truncatula RepID=A9YWR4_MEDTR			Glyma05g13900	Gm05:14595247-14597672	166.09	916.437	2.46407	P17928 Calmodulin n=7 Tax=Magnoliophyta RepID=CALM_MEDSA
Glyma17g35490	Gm17:39478720-39481808	32.1018	6.61801	-2.27818	Q2HRK7 Protease-associated PA; Proteinase inhibitor I9, subtilisin propeptide n=1 Tax=Medicago truncatula RepID=Q2HRK7_MEDTR			Glyma19g45030	Gm19:50275754-50289348	15.6413	86.3456	2.46476	C0SNP2 Late elongated hypocotyl and circadian clock associated-1-like protein 2 n=1 Tax=Glycine max RepID=C0SNP2_SOYBN
Glyma15g20060	Gm15:17689333-17690861	7.43031	1.53768	-2.27267	B9RR57 21 kDa protein, putative n=1 Tax=Ricinus communis RepID=B9RR57_RICCO			Glyma19g40810	Gm19:47126360-47129191	140.977	778.313	2.46489	I1NBG9 S-adenosylmethionine synthase n=1 Tax=Glycine max RepID=I1NBG9_SOYBN
Glyma07g08011	Gm07:6654787-6661778	25.5912	5.29621	-2.27261	Q9LQ79 T1N6.18 protein n=1 Tax=Arabidopsis thaliana RepID=Q9LQ79_ARATH			Glyma06g18890	Gm06:15175180-15181763	0.320322	1.77013	2.46626	B2ZF64 Raffionse synthase 2 n=1 Tax=Glycine max RepID=B2ZF64_SOYBN
Glyma03g21620	Gm03:27272448-27277331	25.5147	5.28397	-2.27163	Q9S7A6 F21O3.2 protein n=1 Tax=Arabidopsis thaliana RepID=Q9S7A6_ARATH			Glyma13g43130	Gm13:42920092-42925862	35.5614	196.603	2.4669	I1M5G8 Malic enzyme n=1 Tax=Glycine max RepID=I1M5G8_SOYBN
Glyma11g11940	Gm11:8510826-8517183	3.15304	0.654254	-2.26882	B9RHC5 Xylem serine proteinase 1, putative n=1 Tax=Ricinus communis RepID=B9RHC5_RICCO			Glyma09g16810	Gm09:20269204-20271811	1.22006	6.75139	2.46823	Q9XFL6 Peroxidase 5 n=1 Tax=Phaseolus vulgaris RepID=Q9XFL6_PHAVU
Glyma01g43620	Gm01:54581321-54584247	1.51264	0.313916	-2.26862	G7K9A5 GRAS family transcription factor n=1 Tax=Medicago truncatula RepID=G7K9A5_MEDTR			Glyma08g07470	Gm08:5334959-5336036	1.20272	6.65799	2.46878	G7JV62 RING-H2 finger protein ATL1O n=1 Tax=Medicago truncatula RepID=G7JV62_MEDTR
Glyma10g29710	Gm10:38484414-38487403	15.1212	3.14236	-2.26665	B9RF30 Chloroplast-targeted copper chaperone, putative n=1 Tax=Ricinus communis RepID=B9RF30_RICCO			Glyma08g04230	Gm08:2974335-2975671	1.89357	10.4825	2.4688	B9RQL2 Cytoplasmic dynein light chain, putative n=1 Tax=Ricinus communis RepID=B9RQL2_RICCO
Glyma15g02130	Gm15:1412971-1414191	3.9401	0.819197	-2.26595	G7IUM6 Ethylene-responsive transcription factor TINY n=1 Tax=Medicago truncatula RepID=G7IUM6_MEDTR			Glyma12g02610	Gm12:1706431-1711018	2.26324	12.5372	2.46976	B9SR02 Multicopper oxidase, putative n=1 Tax=Ricinus communis RepID=B9SR02_RICCO
Glyma09g39650	Gm09:44683594-44690911	89.105	18.5387	-2.26496	B9RDQ4 DNA binding protein, putative n=1 Tax=Ricinus communis RepID=B9RDQ4_RICCO			Glyma11g35170	Gm11:36901855-36905184	7.54234	41.8231	2.47121	B9T866 Hydrolase, putative n=1 Tax=Ricinus communis RepID=B9T866_RICCO
Glyma05g05880	Gm05:5425018-5427434	7.50837	1.56462	-2.26269	B9SS11 Major pollen allergen Ory s 1, putative n=1 Tax=Ricinus communis RepID=B9SS11_RICCO			Glyma09g07920	Gm09:6903762-6909121	28.4947	158.103	2.4721	Q9SKI2 Vacuolar protein sorting-associated protein 2 homolog 1 n=2 Tax=Arabidopsis RepID=VPS2A_ARATH
Glyma06g23248	Gm06:20345889-20348476	1.68989	0.35221	-2.26243	Q9LI79 Gb|AAB84348.1 n=2 Tax=Arabidopsis thaliana RepID=Q9LI79_ARATH			Glyma08g14460	Gm08:10496546-10499876	50.1469	278.404	2.47295	C6TFT8 Annexin n=2 Tax=Glycine max RepID=C6TFT8_SOYBN
Glyma06g11430	Gm06:8788824-8793541	22.2949	4.65022	-2.26135	Q9SYR0 Nitrate reductase (Fragment) n=1 Tax=Glycine max RepID=Q9SYR0_SOYBN			Glyma09g37350	Gm09:42933274-42937726	5.38245	29.9062	2.47411	B9T740 60S ribosomal protein L34, putative n=1 Tax=Ricinus communis RepID=B9T740_RICCO
Glyma01g04060	Gm01:3533389-3537718	8.63522	1.80182	-2.26078	G7K2S7 Auxin-induced protein 5NG4 n=1 Tax=Medicago truncatula RepID=G7K2S7_MEDTR			Glyma08g02840	Gm08:1941810-1944596	19.179	106.592	2.4745	Q5JZR1 N-rich protein n=1 Tax=Glycine max RepID=Q5JZR1_SOYBN
Glyma10g39130	Gm10:46841265-46847651	2.60457	0.543897	-2.25964	G7K3S6 Type I inositol-1,4,5-trisphosphate 5-phosphatase CVP2 n=1 Tax=Medicago truncatula RepID=G7K3S6_MEDTR			Glyma02g10940	Gm02:9081115-9083995	2.7172	15.1236	2.4766	D2KTV3 MYB-type transcription factor n=1 Tax=Lotus japonicus RepID=D2KTV3_LOTJA
Glyma20g31741	Gm20:40343305-40344473	7.70513	1.61405	-2.25513	Q945L5 AT5g61660/k11j9_180 n=1 Tax=Arabidopsis thaliana RepID=Q945L5_ARATH			Glyma16g33580	Gm16:36456316-36460209	2.5185	14.0274	2.47761	G7KPN7 Receptor-like protein kinase n=1 Tax=Medicago truncatula RepID=G7KPN7_MEDTR
Glyma03g28125	Gm03:35983962-35985412	1.53261	0.321255	-2.2542	E9L584 CLE38 protein n=1 Tax=Glycine max RepID=E9L584_SOYBN			Glyma13g17930	Gm13:21609950-21624010	0.418918	2.33441	2.47832	G7JR15 ABC transporter B family member n=1 Tax=Medicago truncatula RepID=G7JR15_MEDTR
Glyma11g14790	Gm11:10541192-10543561	3.83246	0.804009	-2.25299	G7IHP7 PGR5-like protein n=1 Tax=Medicago truncatula RepID=G7IHP7_MEDTR			Glyma03g27220	Gm03:34827761-34829273	1.9172	10.688	2.47892	D7LRR6 Zinc ion binding protein n=1 Tax=Arabidopsis lyrata subsp. lyrata RepID=D7LRR6_ARALL
Glyma12g07560	Gm12:5188435-5209625	7.44537	1.56207	-2.25288	Q2HSV9 Transcriptional factor B3; Auxin response factor; Aux/IAA_ARF_dimerisation n=1 Tax=Medicago truncatula RepID=Q2HSV9_MEDTR			Glyma07g12840	Gm07:11281768-11288338	49.5627	276.464	2.47976	I1KJD9 Adenylate kinase 8 n=1 Tax=Glycine max RepID=I1KJD9_SOYBN
Glyma06g14860	Gm06:11639999-11644618	3.84351	0.807003	-2.25178	I6UEI0 E2F target protein 1 n=1 Tax=Beta vulgaris RepID=I6UEI0_BETVU			Glyma02g07961	Gm02:6268411-6270240	33.5852	187.667	2.48227	NA
Glyma04g10125	Gm04:8388399-8390803	2.6849	0.563927	-2.25128	G7K086 Axial regulator YABBY n=1 Tax=Medicago truncatula RepID=G7K086_MEDTR			Glyma02g39960	Gm02:45163587-45165353	8.78014	49.0896	2.4831	G7K7C1 Transcription factor bHLH93 n=1 Tax=Medicago truncatula RepID=G7K7C1_MEDTR
Glyma02g09040	Gm02:6997282-7001839	3.89657	0.819666	-2.2491	G7KHQ6 Auxin-induced protein 5NG4 n=1 Tax=Medicago truncatula RepID=G7KHQ6_MEDTR			Glyma02g17390	Gm02:15661856-15663142	6.78927	37.9706	2.48355	NA
Glyma20g25510	Gm20:35185817-35187320	37.3806	7.87359	-2.2472	B6T5L9 Fiber protein Fb34 n=1 Tax=Zea mays RepID=B6T5L9_MAIZE			Glyma11g03160	Gm11:2094780-2098052	2.17721	12.1988	2.48618	B9RBU8 Amino acid binding protein, putative n=1 Tax=Ricinus communis RepID=B9RBU8_RICCO
Glyma15g05700	Gm15:4014568-4016588	5.40783	1.13979	-2.24628	G7ILA4 Cytokinin-O-glucosyltransferase n=1 Tax=Medicago truncatula RepID=G7ILA4_MEDTR			Glyma02g04250	Gm02:3443238-3447178	6.47613	36.2863	2.48622	G7K048 Lipase n=1 Tax=Medicago truncatula RepID=G7K048_MEDTR
Glyma01g10100	Gm01:12915879-12921146	6.29756	1.32739	-2.2462	Q0PW22 Leucine-rich repeat receptor-like kinase n=1 Tax=Populus tomentosa RepID=Q0PW22_POPTO			Glyma11g06280	Gm11:4457687-4459409	1.21075	6.78551	2.48656	Q9ZTZ3 24 kDa seed maturation protein n=1 Tax=Glycine max RepID=Q9ZTZ3_SOYBN
Glyma14g07360	Gm14:5586403-5589414	2.47074	0.52089	-2.24589	B9T4C8 Alpha-expansin 4, putative n=1 Tax=Ricinus communis RepID=B9T4C8_RICCO			Glyma06g03960	Gm06:2760006-2763097	8.65445	48.5427	2.48774	G7J5Q8 Serpin-like protein n=1 Tax=Medicago truncatula RepID=G7J5Q8_MEDTR
Glyma16g33010	Gm16:36104522-36108575	5.49922	1.16043	-2.24457	G7KMY7 Receptor-like protein kinase n=1 Tax=Medicago truncatula RepID=G7KMY7_MEDTR			Glyma16g24570	Gm16:28547514-28550466	0.486781	2.73105	2.48811	B9S689 Epoxide hydrolase, putative n=1 Tax=Ricinus communis RepID=B9S689_RICCO
Glyma08g45320	Gm08:44742530-44748521	12.0709	2.54749	-2.24438	G7I880 Auxin-induced protein 5NG4 n=1 Tax=Medicago truncatula RepID=G7I880_MEDTR			Glyma20g02240	Gm20:1899526-1902355	0.311424	1.74881	2.48942	B9S109 Glucan endo-1,3-beta-glucosidase, putative n=1 Tax=Ricinus communis RepID=B9S109_RICCO
Glyma03g29380	Gm03:37377109-37381295	3.39326	0.716295	-2.24405	B9SUE1 ATP binding protein, putative n=1 Tax=Ricinus communis RepID=B9SUE1_RICCO			Glyma03g28640	Gm03:36586770-36587603	1.36992	7.69738	2.49027	NA
Glyma07g27820	Gm07:31342458-31348117	15.1289	3.19449	-2.24365	D9ZIT1 C2H2L domain class transcription factor n=1 Tax=Malus x domestica RepID=D9ZIT1_MALDO			Glyma06g18620	Gm06:14903205-14905080	1.05948	5.95314	2.49029	B9SVM2 Protein phosphatase 2c, putative n=1 Tax=Ricinus communis RepID=B9SVM2_RICCO
Glyma07g01630	Gm07:1070472-1075600	43.1181	9.10514	-2.24354	B9SW52 Glucose-6-phosphate 1-dehydrogenase n=1 Tax=Ricinus communis RepID=B9SW52_RICCO			Glyma02g03280	Gm02:2540711-2542352	11.5065	64.7253	2.49188	B6CAM2 Matrix metalloproteinase n=1 Tax=Glycine max RepID=B6CAM2_SOYBN
Glyma02g13380	Gm02:11692902-11694668	3.83748	0.811587	-2.24134	NA			Glyma17g14620	Gm17:11361442-11363797	10.0732	56.6769	2.49224	G7JK58 Lipid transfer-like protein VAS n=1 Tax=Medicago truncatula RepID=G7JK58_MEDTR
Glyma07g38900	Gm07:43531334-43532814	2.10193	0.444678	-2.24088	NA			Glyma11g19150	Gm11:15802805-15810022	0.864673	4.87043	2.49382	G7IRD9 Fatty acyl-CoA reductase n=1 Tax=Medicago truncatula RepID=G7IRD9_MEDTR
Glyma20g28290	Gm20:37220851-37228957	16.7553	3.54634	-2.24022	I1NGD0 Lipoxygenase n=2 Tax=Glycine max RepID=I1NGD0_SOYBN			Glyma14g32900	Gm14:40041811-40049155	3.75034	21.1357	2.49459	B9S7G4 Carboxylesterase np, putative n=1 Tax=Ricinus communis RepID=B9S7G4_RICCO
Glyma14g07570	Gm14:5717341-5721663	6.39439	1.35378	-2.23982	G7KBN3 U-box domain-containing protein n=1 Tax=Medicago truncatula RepID=G7KBN3_MEDTR			Glyma17g11450	Gm17:8599035-8600570	0.982136	5.54067	2.49607	NA
Glyma01g09520	Gm01:11695475-11701510	25.855	5.47585	-2.23929	B9RLC9 Rubisco subunit binding-protein beta subunit, rubb, putative n=1 Tax=Ricinus communis RepID=B9RLC9_RICCO			Glyma03g03480	Gm03:3225305-3227067	0.407847	2.30119	2.49628	B9IBX4 SAUR family protein n=1 Tax=Populus trichocarpa RepID=B9IBX4_POPTR
Glyma10g07663	Gm10:6401760-6403143	17.8272	3.78197	-2.23687	NA			Glyma03g34600	Gm03:41988145-41990029	0.889306	5.02204	2.49752	A5C0W3 Peptidyl-prolyl cis-trans isomerase n=1 Tax=Vitis vinifera RepID=A5C0W3_VITVI
Glyma03g41230	Gm03:46745324-46751328	40.6186	8.62484	-2.23557	G7I670 SAP1 protein n=1 Tax=Medicago truncatula RepID=G7I670_MEDTR			Glyma02g13460	Gm02:11776008-11779002	0.318657	1.80086	2.49861	G7JY52 Kinase-like protein n=1 Tax=Medicago truncatula RepID=G7JY52_MEDTR
Glyma06g43711	Gm06:46728714-46730091	2.87714	0.61158	-2.23402	NA			Glyma03g14950	Gm03:19201827-19207684	0.362525	2.05097	2.50016	G7JS84 DUF246 domain-containing protein n=1 Tax=Medicago truncatula RepID=G7JS84_MEDTR
Glyma14g16883	Gm14:18374117-18375256	2.17448	0.462458	-2.23327	NA			Glyma05g13660	Gm05:14323985-14325641	1.24806	7.0633	2.50066	P35694 Brassinosteroid-regulated protein BRU1 n=2 Tax=Glycine max RepID=BRU1_SOYBN
Glyma10g21570	Gm10:27227889-27230890	4.76441	1.01361	-2.2328	E6NUF4 JMS10C05.9 protein n=1 Tax=Jatropha curcas RepID=E6NUF4_9ROSI			Glyma13g39810	Gm13:40346291-40353498	5.54532	31.3874	2.50084	G8A151 Dolichol kinase n=1 Tax=Medicago truncatula RepID=G8A151_MEDTR
Glyma06g07350	Gm06:5356151-5358620	5.95439	1.26816	-2.23122	G7JB51 Zinc finger protein-like protein n=1 Tax=Medicago truncatula RepID=G7JB51_MEDTR			Glyma10g01640	Gm10:1186042-1187391	22.6833	128.503	2.5021	Q0GPH7 BZIP transcription factor bZIP59 n=1 Tax=Glycine max RepID=Q0GPH7_SOYBN
Glyma01g39790	Gm01:51653322-51656914	15.9926	3.41217	-2.22864	G7K3Y6 Natural resistance-associated macrophage protein n=1 Tax=Medicago truncatula RepID=G7K3Y6_MEDTR			Glyma13g38040	Gm13:38956764-38959166	52.2386	296.034	2.50257	G7IRJ7 Xyloglucan endotransglucosylase/hydrolase n=2 Tax=Medicago truncatula RepID=G7IRJ7_MEDTR
Glyma05g28321	Gm05:34164512-34169799	2.77296	0.591666	-2.22857	Q9LK44 Emb|CAB10191.1 n=1 Tax=Arabidopsis thaliana RepID=Q9LK44_ARATH			Glyma14g08400	Gm14:6426719-6430904	10.2244	57.9411	2.50257	B2LWM4 1-acyl-sn-glycerol-3-phosphate acyltransferase n=1 Tax=Ricinus communis RepID=B2LWM4_RICCO
Glyma12g31840	Gm12:35394795-35398555	11.3345	2.41942	-2.22799	G7ITV5 Cellulose synthase-like protein H1 n=1 Tax=Medicago truncatula RepID=G7ITV5_MEDTR			Glyma02g08201	Gm02:6426231-6427927	0.743511	4.21772	2.50404	Q9C8N6 DNA polymerase type I, putative; 54894-56354 n=1 Tax=Arabidopsis thaliana RepID=Q9C8N6_ARATH
Glyma07g00590	Gm07:282046-285716	6.26896	1.33879	-2.22729	G7JVL1 Xyloglucan glycosyltransferase n=1 Tax=Medicago truncatula RepID=G7JVL1_MEDTR			Glyma19g41580	Gm19:47808303-47808852	2.48618	14.104	2.50411	B9RFK5 Transcription factor, putative n=1 Tax=Ricinus communis RepID=B9RFK5_RICCO
Glyma08g04880	Gm08:3469862-3473326	2.57262	0.550687	-2.22393	I1K5N1 Pectinesterase n=1 Tax=Glycine max RepID=I1K5N1_SOYBN			Glyma15g12211	Gm15:9034746-9035767	27.3508	155.183	2.50431	G7JLQ2 Cysteine proteinase inhibitor n=1 Tax=Medicago truncatula RepID=G7JLQ2_MEDTR
Glyma18g02910	Gm18:1892555-1893966	23.5278	5.03776	-2.22351	G7K270 LOB domain-containing protein n=1 Tax=Medicago truncatula RepID=G7K270_MEDTR			Glyma11g13040	Gm11:9302227-9303424	1.07747	6.1139	2.50444	G7J7F1 RING finger protein n=1 Tax=Medicago truncatula RepID=G7J7F1_MEDTR
Glyma08g45210	Gm08:44622011-44630245	148.88	31.9201	-2.22161	I1KYU6 Phosphorylase n=1 Tax=Glycine max RepID=I1KYU6_SOYBN			Glyma14g11160	Gm14:9503974-9506165	5.12059	29.0942	2.50635	G7I932 MTD1 n=1 Tax=Medicago truncatula RepID=G7I932_MEDTR
Glyma09g07240	Gm09:6107167-6118277	42.2789	9.06713	-2.22122	E1CI63 GIGANTEA n=1 Tax=Glycine max RepID=E1CI63_SOYBN			Glyma18g40652	Gm18:49342485-49343471	1.75284	9.96002	2.50645	G7IMB8 Ubiquitin carboxyl-terminal hydrolase n=1 Tax=Medicago truncatula RepID=G7IMB8_MEDTR
Glyma05g25980	Gm05:32014545-32020418	5.95676	1.27759	-2.22111	G7JDY9 DNA replication licensing factor MCM3-like protein n=1 Tax=Medicago truncatula RepID=G7JDY9_MEDTR			Glyma03g28760	Gm03:36707978-36709723	127.905	727.107	2.50709	Q2HRG8 Polyadenylate-binding protein-interacting protein n=1 Tax=Medicago truncatula RepID=Q2HRG8_MEDTR
Glyma12g33500	Gm12:36746939-36750562	1.10575	0.237336	-2.22003	B9RVS6 Nucleic acid binding protein, putative n=1 Tax=Ricinus communis RepID=B9RVS6_RICCO			Glyma16g17680	Gm16:19294286-19298818	7.67561	43.6446	2.50745	Q05JX9 Pinoresinol-lariciresinol reductase homolog n=1 Tax=Lotus japonicus RepID=Q05JX9_LOTJA
Glyma14g06590	Gm14:4822396-4827923	36.1371	7.75672	-2.21996	B9SLL7 Metalloendopeptidase, putative n=1 Tax=Ricinus communis RepID=B9SLL7_RICCO			Glyma10g06030	Gm10:4764170-4764813	27.8752	158.523	2.50764	NA
Glyma02g33100	Gm02:36950611-36952304	3.60633	0.774185	-2.21978	G7K5F8 Omega-hydroxypalmitate O-feruloyl transferase n=1 Tax=Medicago truncatula RepID=G7K5F8_MEDTR			Glyma17g11970	Gm17:9015074-9018145	9.99038	56.834	2.50814	G7JFC4 Seed imbibition protein n=1 Tax=Medicago truncatula RepID=G7JFC4_MEDTR
Glyma11g21670	Gm11:18822890-18828982	87.13	18.725	-2.2182	E1ZRG6 Expressed protein n=1 Tax=Chlorella variabilis RepID=E1ZRG6_CHLVA			Glyma02g28424	Gm02:29774169-29775211	0.639854	3.64075	2.50842	NA
Glyma02g04420	Gm02:3590432-3594159	3.46938	0.746411	-2.21664	Q9LRV7 Gb|AAF04880.1 n=2 Tax=Arabidopsis thaliana RepID=Q9LRV7_ARATH			Glyma02g26160	Gm02:27007711-27014388	3.65929	20.8252	2.50869	I1JFT4 Lipoxygenase n=1 Tax=Glycine max RepID=I1JFT4_SOYBN
Glyma04g40630	Gm04:46625355-46626504	6.02204	1.29591	-2.21629	B2KL74 NDR1/HIN1-like protein n=1 Tax=Vitis vinifera RepID=B2KL74_VITVI			Glyma20g03210	Gm20:2901294-2911979	8.79477	50.2138	2.51337	G7JHH4 Beta-glucosidase n=2 Tax=Medicago truncatula RepID=G7JHH4_MEDTR
Glyma10g14660	Gm10:16912366-16915466	6.14114	1.32207	-2.21571	NA			Glyma01g03360	Gm01:2857640-2860816	8.0159	45.7887	2.51406	G7K048 Lipase n=1 Tax=Medicago truncatula RepID=G7K048_MEDTR
Glyma12g36260	Gm12:39346132-39350455	24.9626	5.37834	-2.21453	B9SEX4 Zinc finger protein, putative n=1 Tax=Ricinus communis RepID=B9SEX4_RICCO			Glyma11g33985	Gm11:35825196-35828111	0.518985	2.96557	2.51454	C6ZRX8 Protein kinase n=1 Tax=Glycine max RepID=C6ZRX8_SOYBN
Glyma17g01990	Gm17:1231910-1233817	9.72431	2.09724	-2.2131	B9RTU3 Basic 7S globulin 2 small subunit, putative n=1 Tax=Ricinus communis RepID=B9RTU3_RICCO			Glyma04g03740	Gm04:2735597-2737768	0.351723	2.01108	2.51546	A0MAV5 Allene oxide synthase n=1 Tax=Glycine max RepID=A0MAV5_SOYBN
Glyma17g11460	Gm17:8609150-8611270	13.1281	2.83232	-2.2126	Q3EBE3 Chlororespiratory reduction 6 n=1 Tax=Arabidopsis thaliana RepID=Q3EBE3_ARATH			Glyma04g01890	Gm04:1267775-1273139	0.638589	3.65349	2.51632	B9R8N8 Serine/threonine-protein kinase cx32, putative n=1 Tax=Ricinus communis RepID=B9R8N8_RICCO
Glyma13g27110	Gm13:30279920-30282097	7.8303	1.68999	-2.21205	NA			Glyma17g17120	Gm17:13955549-13956600	15.3758	87.9972	2.5168	B9SH34 Phytosulfokines, putative n=1 Tax=Ricinus communis RepID=B9SH34_RICCO
Glyma20g27570	Gm20:36710336-36714219	6.50753	1.40485	-2.2117	Q9XED4 Receptor-like protein kinase homolog RK20-1 n=1 Tax=Phaseolus vulgaris RepID=Q9XED4_PHAVU			Glyma06g14661	Gm06:11502737-11507878	0.486231	2.78423	2.51756	Q10LU7 Expressed protein n=1 Tax=Oryza sativa Japonica Group RepID=Q10LU7_ORYSJ
Glyma07g11550	Gm07:9739095-9743292	14.4226	3.12142	-2.20806	B9I2E8 Auxin efflux carrier component n=1 Tax=Populus trichocarpa RepID=B9I2E8_POPTR			Glyma10g38390	Gm10:46186072-46187958	0.276836	1.58686	2.51907	G7IAR1 Multidrug and toxin extrusion protein n=1 Tax=Medicago truncatula RepID=G7IAR1_MEDTR
Glyma04g42910	Gm04:48532549-48534321	2.25106	0.487305	-2.20771	A8IXG1 Universal stress protein family protein n=1 Tax=Brassica rapa RepID=A8IXG1_BRACM			Glyma13g00590	Gm13:320106-325664	1.80573	10.3586	2.52017	Q2HUM2 Oxysterol-binding protein n=2 Tax=Medicago truncatula RepID=Q2HUM2_MEDTR
Glyma20g22150	Gm20:32068041-32068922	6.78142	1.47005	-2.20572	NA			Glyma15g41486	Gm15:48589041-48592291	9.71897	55.8358	2.52232	I3TAY1 Nuclear transcription factor Y subunit C4 n=1 Tax=Medicago truncatula RepID=I3TAY1_MEDTR
Glyma20g32670	Gm20:41302474-41309716	4.95064	1.07376	-2.20495	G7I4W9 Baculoviral IAP repeat-containing protein n=1 Tax=Medicago truncatula RepID=G7I4W9_MEDTR			Glyma02g17381	Gm02:15660944-15661546	10.5361	60.609	2.52419	G7IF86 Katanin p60 ATPase-containing subunit n=1 Tax=Medicago truncatula RepID=G7IF86_MEDTR
Glyma03g29150	Gm03:37095748-37103423	1.54906	0.336007	-2.20483	B9II87 White-brown-complex ABC transporter family n=1 Tax=Populus trichocarpa RepID=B9II87_POPTR			Glyma01g19420	Gm01:23910735-23912214	4.34845	25.0226	2.52466	NA
Glyma09g04010	Gm09:2944748-2949753	9.68789	2.10189	-2.20449	A2Q2W7 4Fe-4S ferredoxin, iron-sulfur binding n=1 Tax=Medicago truncatula RepID=A2Q2W7_MEDTR			Glyma12g08150	Gm12:5874275-5880441	36.736	211.427	2.52489	Q8RUN2 Cytokinin riboside 5'-monophosphate phosphoribohydrolase LOG1 n=1 Tax=Arabidopsis thaliana RepID=LOG1_ARATH
Glyma15g03010	Gm15:2105179-2106394	18.962	4.11584	-2.20385	Q9LVK8 Gb|AAD10145.1 n=1 Tax=Arabidopsis thaliana RepID=Q9LVK8_ARATH			Glyma13g36950	Gm13:38153658-38154649	2.40396	13.8467	2.52606	G7JUX5 Glutaredoxin-C9 n=1 Tax=Medicago truncatula RepID=G7JUX5_MEDTR
Glyma20g26160	Gm20:35684297-35691547	1.8447	0.400407	-2.20385	G7IAS5 ABC transporter G family member n=1 Tax=Medicago truncatula RepID=G7IAS5_MEDTR			Glyma19g22270	Gm19:26865498-26869088	30.9733	178.719	2.52859	Q9SGI5 F28J7.19 protein n=2 Tax=Arabidopsis thaliana RepID=Q9SGI5_ARATH
Glyma06g07780	Gm06:5705150-5706539	3.35941	0.729787	-2.20266	B9RS83 Sulfate transporter, putative n=1 Tax=Ricinus communis RepID=B9RS83_RICCO			Glyma05g28250	Gm05:34114853-34115815	0.751588	4.34179	2.53028	Q84XY6 Cystatin n=1 Tax=Malus x domestica RepID=Q84XY6_MALDO
Glyma10g31110	Gm10:39668738-39670615	19.6713	4.27452	-2.20226	G7I667 Ammonium transporter n=2 Tax=Medicago truncatula RepID=G7I667_MEDTR			Glyma14g02630	Gm14:1629489-1630728	2.75096	15.8984	2.53087	B0ZSJ5 Geranyl-diphosphate synthase n=1 Tax=Glycine max RepID=B0ZSJ5_SOYBN
Glyma15g12570	Gm15:9277232-9278360	5.86693	1.27525	-2.20183	I3TAX1 Nuclear transcription factor Y subunit B13 n=1 Tax=Medicago truncatula RepID=I3TAX1_MEDTR			Glyma18g47600	Gm18:57203676-57209596	22.3818	129.396	2.53139	G7KQL9 ABC transporter n=1 Tax=Medicago truncatula RepID=G7KQL9_MEDTR
Glyma10g30650	Gm10:39265565-39269217	14.6567	3.18634	-2.20158	B9S7I1 Synovial sarcoma associated ss18 protein, putative n=1 Tax=Ricinus communis RepID=B9S7I1_RICCO			Glyma08g04911	Gm08:3502619-3505873	0.35056	2.02784	2.53221	G7L9S6 Kinase R-like protein n=1 Tax=Medicago truncatula RepID=G7L9S6_MEDTR
Glyma07g31740	Gm07:36702438-36707051	13.6321	2.96378	-2.2015	G7IBD4 Chaperone protein dnaJ n=1 Tax=Medicago truncatula RepID=G7IBD4_MEDTR			Glyma07g38500	Gm07:43220059-43223656	0.367712	2.12744	2.53247	D7LYJ3 Binding protein n=1 Tax=Arabidopsis lyrata subsp. lyrata RepID=D7LYJ3_ARALL
Glyma20g22840	Gm20:32747090-32747688	7.2255	1.57433	-2.19836	NA			Glyma11g35390	Gm11:37037852-37040725	0.332272	1.92263	2.53265	G7JBB1 Serine/threonine protein kinase-like protein CCR4 n=1 Tax=Medicago truncatula RepID=G7JBB1_MEDTR
Glyma20g02290	Gm20:1935458-1937402	1.19248	0.260142	-2.1966	G7IFA6 Cytochrome P450 monooxygenase CYP89A28 n=1 Tax=Medicago truncatula RepID=G7IFA6_MEDTR			Glyma03g40930	Gm03:46522399-46526670	1.19937	6.94663	2.53404	B9S7I1 Synovial sarcoma associated ss18 protein, putative n=1 Tax=Ricinus communis RepID=B9S7I1_RICCO
Glyma20g28680	Gm20:37618569-37624532	3.02177	0.659915	-2.19504	G7K3S6 Type I inositol-1,4,5-trisphosphate 5-phosphatase CVP2 n=1 Tax=Medicago truncatula RepID=G7K3S6_MEDTR			Glyma16g01070	Gm16:736714-743684	24.4715	141.83	2.53499	I1MK14 Lipoxygenase n=1 Tax=Glycine max RepID=I1MK14_SOYBN
Glyma08g28760	Gm08:23129363-23130788	2.41948	0.529377	-2.19233	G7JFT3 F-box/FBD/LRR-repeat protein n=1 Tax=Medicago truncatula RepID=G7JFT3_MEDTR			Glyma12g27340	Gm12:30846228-30850517	12.8755	74.6822	2.53613	Q9ZPL8 Protein phosphatase type 2C n=1 Tax=Lotus japonicus RepID=Q9ZPL8_LOTJA
Glyma01g27280	Gm01:36438459-36440199	1.41224	0.309914	-2.18804	F5SJT0 Transmembrane protein n=1 Tax=Desmospora sp. 8437 RepID=F5SJT0_9BACL			Glyma13g17790	Gm13:21511116-21514221	15.1593	88.1675	2.54005	B4FPE0 Cytidine/deoxycytidylate deaminase family protein n=1 Tax=Zea mays RepID=B4FPE0_MAIZE
Glyma17g34550	Gm17:38551222-38553478	5.71571	1.25509	-2.18715	I1SSK1 Glutaredoxin 2.1 n=1 Tax=Hevea brasiliensis RepID=I1SSK1_HEVBR			Glyma09g11111	Gm09:11185125-11192752	16.5808	96.436	2.54006	G7IGM5 Carbohydrate transporter/sugar porter n=1 Tax=Medicago truncatula RepID=G7IGM5_MEDTR
Glyma15g41970	Gm15:49244899-49248800	2.69747	0.592861	-2.18584	Q9LTW4 Aspartyl protease family protein n=2 Tax=Arabidopsis thaliana RepID=Q9LTW4_ARATH			Glyma17g35620	Gm17:39601541-39603441	2.02472	11.7778	2.54027	Q0PJL0 MYB transcription factor MYB70 n=1 Tax=Glycine max RepID=Q0PJL0_SOYBN
Glyma06g01430	Gm06:888837-891458	26.8465	5.90056	-2.18581	G7J737 Transcription factor BEE n=1 Tax=Medicago truncatula RepID=G7J737_MEDTR			Glyma01g41670	Gm01:53110676-53113457	24.9114	144.936	2.54054	G2XKY2 Tonoplast intrinsic protein n=1 Tax=Glycine soja RepID=G2XKY2_GLYSO
Glyma02g09550	Gm02:7471958-7480124	2.87607	0.632397	-2.1852	A3QVR9 Histidine kinase 2 n=1 Tax=Lotus japonicus RepID=A3QVR9_LOTJA			Glyma12g05760	Gm12:3850578-3852326	7.22604	42.0807	2.54188	G7KVB6 Metal tolerance protein n=1 Tax=Medicago truncatula RepID=G7KVB6_MEDTR
Glyma09g42070	Gm09:46723840-46724815	5.09998	1.12198	-2.18444	Q33AB2 Expressed protein n=1 Tax=Oryza sativa Japonica Group RepID=Q33AB2_ORYSJ			Glyma09g31580	Gm09:38259174-38261093	0.678271	3.95736	2.54461	G7KN12 Transcription factor BEE n=1 Tax=Medicago truncatula RepID=G7KN12_MEDTR
Glyma03g40070	Gm03:45935093-45937184	5.77148	1.27024	-2.18383	O80895 Expressed protein n=1 Tax=Arabidopsis thaliana RepID=O80895_ARATH			Glyma12g35650	Gm12:38782008-38784424	1.33583	7.80308	2.54631	B9SGM7 Transcription factor RF2a, putative n=1 Tax=Ricinus communis RepID=B9SGM7_RICCO
Glyma04g35970	Gm04:42477792-42488479	14.6929	3.23384	-2.1838	G7J4W0 Retinol dehydrogenase n=1 Tax=Medicago truncatula RepID=G7J4W0_MEDTR			Glyma05g03520	Gm05:2708741-2711102	11.3569	66.3743	2.54706	B9R9G5 Protein binding protein, putative n=1 Tax=Ricinus communis RepID=B9R9G5_RICCO
Glyma13g05380	Gm13:5701881-5703917	5.77955	1.27353	-2.18212	B9T6Z4 Transcription factor, putative n=1 Tax=Ricinus communis RepID=B9T6Z4_RICCO			Glyma12g09900	Gm12:7637698-7638355	0.84942	4.96562	2.54742	Q2HSJ9 Harpin-induced 1 n=1 Tax=Medicago truncatula RepID=Q2HSJ9_MEDTR
Glyma15g08540	Gm15:6030625-6034911	16.8819	3.72032	-2.18198	D3GBU7 Auxin response factor 3b n=1 Tax=Lotus japonicus RepID=D3GBU7_LOTJA			Glyma13g09550	Gm13:10993963-10995110	2.80703	16.4111	2.54755	G7I8G4 Calmodulin-like protein n=1 Tax=Medicago truncatula RepID=G7I8G4_MEDTR
Glyma20g26300	Gm20:35806822-35811093	13.5267	2.98237	-2.18128	Q94JT5 AT4g35220/F23E12_220 n=1 Tax=Arabidopsis thaliana RepID=Q94JT5_ARATH			Glyma14g09020	Gm14:6993133-6998862	5.68687	33.2576	2.54798	G7I3N5 Protein phosphatase 2C-like protein n=1 Tax=Medicago truncatula RepID=G7I3N5_MEDTR
Glyma12g33130	Gm12:36488133-36489164	82.4701	18.184	-2.1812	Q8SAW8 Expressed protein n=2 Tax=Oryza sativa RepID=Q8SAW8_ORYSJ			Glyma09g09120	Gm09:8628194-8629376	0.817256	4.78058	2.54833	Q9LUN9 Gb|AAD49763.1 n=2 Tax=Arabidopsis thaliana RepID=Q9LUN9_ARATH
Glyma06g44010	Gm06:46980624-46983772	9.20016	2.02869	-2.18111	G7JUY0 O-methyltransferase n=1 Tax=Medicago truncatula RepID=G7JUY0_MEDTR			Glyma09g15000	Gm09:17269019-17289755	0.720109	4.2124	2.54836	G7JZD9 Cysteine-rich receptor-like protein kinase n=1 Tax=Medicago truncatula RepID=G7JZD9_MEDTR
Glyma17g07080	Gm17:5146438-5148015	1.25613	0.277147	-2.18026	NA			Glyma07g32010	Gm07:36948976-36955048	1.39012	8.1319	2.54839	E4MYA4 mRNA, clone: RTFL01-47-G18 n=1 Tax=Eutrema halophilum RepID=E4MYA4_THEHA
Glyma13g37010	Gm13:38209279-38213655	47.6425	10.5255	-2.17837	B9RVT6 DNA binding protein, putative n=1 Tax=Ricinus communis RepID=B9RVT6_RICCO			Glyma20g26420	Gm20:35878407-35880521	1.1539	6.75064	2.5485	G7J1D0 Limonoid UDP-glucosyltransferase n=1 Tax=Medicago truncatula RepID=G7J1D0_MEDTR
Glyma11g05591	Gm11:3944371-3946693	3.64176	0.80472	-2.17808	Q7XAB7 Cyclin D3-2 n=1 Tax=Euphorbia esula RepID=Q7XAB7_EUPES			Glyma08g20010	Gm08:15080493-15083949	3.0803	18.021	2.54854	G7IPG3 Kinase-like protein n=2 Tax=Medicago truncatula RepID=G7IPG3_MEDTR
Glyma07g33070	Gm07:37969511-37971270	3.42204	0.756234	-2.17795	A3QRM2 Senescence-associated nodulin 1B n=1 Tax=Glycine max RepID=A3QRM2_SOYBN			Glyma06g48040	Gm06:50368239-50370720	18.1284	106.104	2.54916	Q9ZWN0 GPI-anchored protein n=1 Tax=Vigna radiata RepID=Q9ZWN0_VIGRA
Glyma09g41960	Gm09:46656837-46664764	19.5758	4.32622	-2.17789	H2BIS8 ABA 8'-hydroxylase n=1 Tax=Citrus sinensis RepID=H2BIS8_CITSI			Glyma11g19650	Gm11:16394575-16400897	9.31065	54.5159	2.54972	B9HQS2 Argonaute protein group n=1 Tax=Populus trichocarpa RepID=B9HQS2_POPTR
Glyma08g42490	Gm08:42460399-42462206	3.91678	0.866533	-2.17634	G7J1R6 Anthranilate N-benzoyltransferase protein n=1 Tax=Medicago truncatula RepID=G7J1R6_MEDTR			Glyma07g09860	Gm07:8314302-8320645	7.07754	41.451	2.55008	G7L902 Lipase n=1 Tax=Medicago truncatula RepID=G7L902_MEDTR
Glyma02g00690	Gm02:471882-481107	5.27587	1.16813	-2.17521	G7I4V2 COP1-interacting protein n=1 Tax=Medicago truncatula RepID=G7I4V2_MEDTR			Glyma08g39870	Gm08:39470554-39475973	3.57341	20.9469	2.55136	B9S4L7 Trehalose-6-phosphate synthase, putative n=1 Tax=Ricinus communis RepID=B9S4L7_RICCO
Glyma11g03930	Gm11:2628862-2631646	2.70037	0.597923	-2.17512	G7JXG0 Kinase-like protein n=1 Tax=Medicago truncatula RepID=G7JXG0_MEDTR			Glyma02g19754	Gm02:18950864-18954077	10.1764	59.6659	2.55168	Q0GPH4 BZIP transcription factor bZIP68 n=1 Tax=Glycine max RepID=Q0GPH4_SOYBN
Glyma20g08520	Gm20:11966938-11970308	3.0677	0.680122	-2.17329	G7IZR4 Molybdopterin synthase catalytic subunit n=1 Tax=Medicago truncatula RepID=G7IZR4_MEDTR			Glyma09g40970	Gm09:45751381-45756002	5.89476	34.5801	2.55244	I1L6Y7 Thioredoxin n=1 Tax=Glycine max RepID=I1L6Y7_SOYBN
Glyma05g27810	Gm05:33677559-33682028	8.10309	1.79686	-2.17299	Q9SR48 F12A21.28 n=1 Tax=Arabidopsis thaliana RepID=Q9SR48_ARATH			Glyma13g05230	Gm13:5450859-5455406	1.80285	10.5966	2.55525	G7KZU7 2-aminoethanethiol dioxygenase n=1 Tax=Medicago truncatula RepID=G7KZU7_MEDTR
Glyma13g17330	Gm13:21107558-21108489	7.05504	1.56478	-2.17269	NA			Glyma04g38050	Gm04:44472083-44479617	9.67606	56.998	2.55842	G7J2Q6 ATP-dependent Clp protease ATP-binding subunit n=1 Tax=Medicago truncatula RepID=G7J2Q6_MEDTR
Glyma13g04740	Gm13:4995012-5000676	4.04095	0.896843	-2.17177	G7KJG0 Peptide transporter family n=1 Tax=Medicago truncatula RepID=G7KJG0_MEDTR			Glyma03g05050	Gm03:5310573-5311014	3.0645	18.0522	2.55845	G7KVY7 Wound-induced protein n=1 Tax=Medicago truncatula RepID=G7KVY7_MEDTR
Glyma04g33580	Gm04:39215755-39220021	8.24094	1.83417	-2.16768	B9RLY9 Membrane associated ring finger 1,8, putative n=1 Tax=Ricinus communis RepID=B9RLY9_RICCO			Glyma01g45200	Gm01:55559203-55560925	8.26951	48.768	2.56006	Q7XZV9 Expressed protein n=1 Tax=Oryza sativa Japonica Group RepID=Q7XZV9_ORYSJ
Glyma08g01410	Gm08:884378-886872	22.182	4.93772	-2.16748	B9RAC5 Metal ion binding protein, putative n=1 Tax=Ricinus communis RepID=B9RAC5_RICCO			Glyma04g03680	Gm04:2695779-2697788	11.7266	69.2156	2.56131	B9R7P4 Rnf5, putative n=1 Tax=Ricinus communis RepID=B9R7P4_RICCO
Glyma04g25060	Gm04:28660524-28662942	4.73968	1.05583	-2.16642	Q9XQU4 Preprotein translocase subunit SECY, chloroplastic n=1 Tax=Pisum sativum RepID=SECY_PEA			Glyma01g24360	Gm01:31583729-31587255	28.2826	166.965	2.56156	B6TKR3 Catalytic/ hydrolase n=2 Tax=Zea mays RepID=B6TKR3_MAIZE
Glyma07g10370	Gm07:8665425-8667396	1.13536	0.252932	-2.16632	Q9LS60 Gb|AAF26481.1 n=1 Tax=Arabidopsis thaliana RepID=Q9LS60_ARATH			Glyma04g38990	Gm04:45256804-45258151	7.53877	44.5394	2.56268	B2ZGR0 NAC domain protein (Fragment) n=1 Tax=Glycine max RepID=B2ZGR0_SOYBN
Glyma03g41660	Gm03:47065950-47067349	16.7646	3.74015	-2.16425	Q9M373 Arabinogalactan peptide 20 n=1 Tax=Arabidopsis thaliana RepID=AGP20_ARATH			Glyma12g03520	Gm12:2332954-2336891	30.8908	182.537	2.56295	Q9SW40 Major facilitator family protein n=2 Tax=Arabidopsis thaliana RepID=Q9SW40_ARATH
Glyma17g10290	Gm17:7707774-7711360	16.6835	3.72244	-2.1641	Q5U8L7 BHLH transcription factor n=1 Tax=Gossypium hirsutum RepID=Q5U8L7_GOSHI			Glyma17g05580	Gm17:3912719-3918355	9.39234	55.547	2.56415	G7IGH7 Inter-alpha-trypsin inhibitor heavy chain H3 n=1 Tax=Medicago truncatula RepID=G7IGH7_MEDTR
Glyma11g14800	Gm11:10560021-10562490	18.8395	4.20613	-2.1632	G9FTF9 Expansin A5a n=1 Tax=Glycine max RepID=G9FTF9_SOYBN			Glyma10g04710	Gm10:3637921-3642995	2.99095	17.7017	2.56521	G7KZI2 5-dehydro-2-deoxygluconokinase n=2 Tax=Medicago truncatula RepID=G7KZI2_MEDTR
Glyma18g32910	Gm18:38474687-38479827	26.3138	5.87489	-2.16319	B9SYL4 ATP binding protein, putative n=1 Tax=Ricinus communis RepID=B9SYL4_RICCO			Glyma03g17870	Gm03:22495769-22499239	10.9547	64.8456	2.56545	B7FKA1 Hsp70 nucleotide exchange factor fes1 n=1 Tax=Medicago truncatula RepID=B7FKA1_MEDTR
Glyma02g02630	Gm02:1989960-1992538	27.5873	6.15967	-2.16308	Q93XA4 Homeodomain leucine zipper protein HDZ2 n=1 Tax=Phaseolus vulgaris RepID=Q93XA4_PHAVU			Glyma07g37790	Gm07:42743260-42744494	8.56495	50.7433	2.5667	B8XJZ3 Cold-regulated protein n=1 Tax=Glycine max RepID=B8XJZ3_SOYBN
Glyma01g41500	Gm01:52977670-52989183	4.52471	1.01035	-2.16297	G7JXG0 Kinase-like protein n=1 Tax=Medicago truncatula RepID=G7JXG0_MEDTR			Glyma13g32970	Gm13:34968045-34973235	2.69546	15.9699	2.56676	G7JV40 Protein EXECUTER n=1 Tax=Medicago truncatula RepID=G7JV40_MEDTR
Glyma03g33803	Gm03:41279691-41281551	77.0106	17.1985	-2.16277	Q2HV44 Aquaporin PIP2-1 n=1 Tax=Medicago truncatula RepID=Q2HV44_MEDTR			Glyma04g06720	Gm04:5187840-5188958	13.4353	79.6035	2.5668	NA
Glyma20g17273	Gm20:24355522-24362494	3.74302	0.836449	-2.16185	Q9C581 Core-2/I-branching beta-1,6-N-acetylglucosaminyltransferase family protein n=2 Tax=Arabidopsis thaliana RepID=Q9C581_ARATH			Glyma12g22660	Gm12:24555358-24559008	6.70648	39.7357	2.56681	Q9LK35 Receptor-like protein kinase THESEUS 1 n=1 Tax=Arabidopsis thaliana RepID=THE1_ARATH
Glyma03g25280	Gm03:32398570-32402162	7.33416	1.63948	-2.16139	B9SSE2 DNA binding protein, putative n=1 Tax=Ricinus communis RepID=B9SSE2_RICCO			Glyma04g02021	Gm04:1388213-1395049	2.36199	14.0413	2.5716	Q8H8C6 Expressed protein n=1 Tax=Oryza sativa Japonica Group RepID=Q8H8C6_ORYSJ
Glyma18g07444	Gm18:6129494-6135040	1.85284	0.414569	-2.16006	B9SI02 Cdc6, putative n=1 Tax=Ricinus communis RepID=B9SI02_RICCO			Glyma07g21110	Gm07:21551733-21558773	1.28246	7.62836	2.57246	B9RZF5 GTP-binding protein alpha subunit, gna, putative n=1 Tax=Ricinus communis RepID=B9RZF5_RICCO
Glyma18g35400	Gm18:41669442-41673285	12.9034	2.88767	-2.15977	Q6NLW5 Protein XRI1 n=2 Tax=Arabidopsis thaliana RepID=XRI1_ARATH			Glyma13g35960	Gm13:37325953-37329642	0.191077	1.13668	2.5726	G7JZD9 Cysteine-rich receptor-like protein kinase n=1 Tax=Medicago truncatula RepID=G7JZD9_MEDTR
Glyma05g06130	Gm05:5729249-5736084	4.17257	0.935451	-2.1572	G7JHM5 Peptide transporter PTR1 n=1 Tax=Medicago truncatula RepID=G7JHM5_MEDTR			Glyma16g29490	Gm16:33293374-33297776	1.64705	9.80621	2.57381	G7K7L0 Receptor protein kinase-like protein n=1 Tax=Medicago truncatula RepID=G7K7L0_MEDTR
Glyma15g19510	Gm15:16833878-16835243	154.033	34.5569	-2.15619	C7S8C4 Germin-like protein 10 n=1 Tax=Glycine max RepID=C7S8C4_SOYBN			Glyma07g04901	Gm07:3601912-3613047	17.2175	102.538	2.57421	B9RR38 Phosphoinositide 5-phosphatase, putative n=1 Tax=Ricinus communis RepID=B9RR38_RICCO
Glyma12g10650	Gm12:8611616-8617959	3.7795	0.848015	-2.15603	I1LRR0 Glutamate receptor n=1 Tax=Glycine max RepID=I1LRR0_SOYBN			Glyma18g47300	Gm18:56995336-56997541	4.49398	26.7636	2.57421	B0LUR3 Transcription factor n=1 Tax=Glycine max RepID=B0LUR3_SOYBN
Glyma08g40150	Gm08:39850442-39855121	24.9684	5.60287	-2.15587	G7LFF3 Cyclin-D1-1 n=1 Tax=Medicago truncatula RepID=G7LFF3_MEDTR			Glyma17g03400	Gm17:2270962-2271975	2.0647	12.3286	2.578	NA
Glyma07g36680	Gm07:42019475-42024851	7.9948	1.79414	-2.15577	C0LYY9 Minichromosome maintenance 2 protein n=1 Tax=Pisum sativum RepID=C0LYY9_PEA			Glyma02g39870	Gm02:45077199-45080698	14.4291	86.1956	2.57863	B2G284 DNA-binding protein n=1 Tax=Vitis thunbergii RepID=B2G284_9ROSI
Glyma20g19200	Gm20:26831453-26837430	39.9337	8.96501	-2.15523	B9TU35 Pectate lyase 1-27 n=1 Tax=Populus tremula x Populus tremuloides RepID=B9TU35_9ROSI			Glyma03g16600	Gm03:21083293-21085380	4.90471	29.3027	2.57879	Q9FQE5 Glutathione S-transferase GST 13 n=1 Tax=Glycine max RepID=Q9FQE5_SOYBN
Glyma10g33900	Gm10:42129509-42134545	1.48605	0.333616	-2.15522	Q10G00 Expressed protein n=2 Tax=Oryza sativa Japonica Group RepID=Q10G00_ORYSJ			Glyma17g19800	Gm17:18144954-18146565	4.09544	24.48	2.57951	G3ECQ9 Rsmv23 protein n=1 Tax=Glycine max RepID=G3ECQ9_SOYBN
Glyma01g06150	Gm01:6047154-6049059	1.67878	0.37699	-2.15482	Q52QR5 NAC domain protein NAC1 n=1 Tax=Glycine max RepID=Q52QR5_SOYBN			Glyma11g19570	Gm11:16335720-16340242	0.681487	4.07503	2.58005	D7LNI3 Lecithin:cholesterol acyltransferase family protein n=1 Tax=Arabidopsis lyrata subsp. lyrata RepID=D7LNI3_ARALL
Glyma13g02210	Gm13:2058341-2061276	9.59177	2.15425	-2.15461	B9H772 F-box family protein n=1 Tax=Populus trichocarpa RepID=B9H772_POPTR			Glyma05g05180	Gm05:4460843-4462512	3.00343	17.9818	2.58186	G8EVZ8 Ethylene response factor 11 n=1 Tax=Medicago sativa RepID=G8EVZ8_MEDSA
Glyma10g02451	Gm10:1722159-1723070	36.321	8.15844	-2.15444	NA			Glyma08g07250	Gm08:5207058-5213670	1.55942	9.33663	2.58189	G7JCQ0 Rab-GDP dissociation inhibitor n=1 Tax=Medicago truncatula RepID=G7JCQ0_MEDTR
Glyma05g32530	Gm05:37457987-37461237	64.6374	14.5497	-2.15137	Q2QWN1 Expressed protein n=1 Tax=Oryza sativa Japonica Group RepID=Q2QWN1_ORYSJ			Glyma07g15930	Gm07:15649031-15653633	20.6321	123.565	2.58231	B9T255 Oxysterol binding protein, putative n=1 Tax=Ricinus communis RepID=B9T255_RICCO
Glyma09g02170	Gm09:1444943-1450815	27.4234	6.17366	-2.15121	Q2HST1 Ferric reductase-like transmembrane component n=1 Tax=Medicago truncatula RepID=Q2HST1_MEDTR			Glyma16g32440	Gm16:35598613-35599743	1.77056	10.604	2.58233	D7MLA8 Peptidoglycan-binding LysM domain-containing protein n=1 Tax=Arabidopsis lyrata subsp. lyrata RepID=D7MLA8_ARALL
Glyma17g11720	Gm17:8797684-8800909	4.14056	0.93227	-2.15101	G7JGJ5 Monogalactosyldiacylglycerol synthase n=1 Tax=Medicago truncatula RepID=G7JGJ5_MEDTR			Glyma13g35390	Gm13:36810688-36818958	1.74059	10.4268	2.58264	I1M3A1 MLO-like protein n=1 Tax=Glycine max RepID=I1M3A1_SOYBN
Glyma03g29940	Gm03:37954710-37958343	1.5781	0.355377	-2.15076	G7KVC1 Two-component response regulator ARR2 n=1 Tax=Medicago truncatula RepID=G7KVC1_MEDTR			Glyma11g37050	Gm11:38285437-38286396	5.39175	32.3731	2.58597	Q6XPS8 Drought-induced protein 1 n=1 Tax=Glycine latifolia RepID=Q6XPS8_9FABA
Glyma11g33300	Gm11:35102164-35104049	24.0938	5.43324	-2.14877	G7J8M9 Glutamate decarboxylase n=1 Tax=Medicago truncatula RepID=G7J8M9_MEDTR			Glyma07g18570	Gm07:18594296-18597627	6.05493	36.3669	2.58645	Q84V95 Pyruvate decarboxylase 1 n=1 Tax=Lotus corniculatus RepID=Q84V95_LOTCO
Glyma14g06790	Gm14:5007553-5010833	19.5767	4.41503	-2.14865	F4IG20 Acid phosphatase class IIIB protein n=1 Tax=Arabidopsis thaliana RepID=F4IG20_ARATH			Glyma13g19730	Gm13:23209634-23218611	8.08112	48.5785	2.58769	G7L0Q2 Phosphatidate phosphatase LPIN3 n=1 Tax=Medicago truncatula RepID=G7L0Q2_MEDTR
Glyma19g03000	Gm19:3105010-3107033	11.0636	2.49927	-2.14624	G7KSI0 UDP-glucose glucosyltransferase n=1 Tax=Medicago truncatula RepID=G7KSI0_MEDTR			Glyma03g32890	Gm03:40613120-40618246	0.331349	1.99241	2.58809	Q2HVU7 K(+)/H(+) antiporter n=1 Tax=Medicago truncatula RepID=Q2HVU7_MEDTR
Glyma17g09470	Gm17:7026559-7030333	2.55218	0.576963	-2.14518	B9RAY7 Adenosine diphosphatase, putative n=1 Tax=Ricinus communis RepID=B9RAY7_RICCO			Glyma07g10440	Gm07:8726023-8730618	0.21441	1.28968	2.58857	Q9C9T2 Calmodulin binding protein-like protein n=2 Tax=Arabidopsis thaliana RepID=Q9C9T2_ARATH
Glyma15g11880	Gm15:8768660-8770110	12.502	2.82774	-2.14444	G7ILP6 Cytochrome b6 n=1 Tax=Medicago truncatula RepID=G7ILP6_MEDTR			Glyma19g02430	Gm19:2165321-2169862	4.7668	28.6795	2.58893	G7KZU7 2-aminoethanethiol dioxygenase n=1 Tax=Medicago truncatula RepID=G7KZU7_MEDTR
Glyma01g44730	Gm01:55288177-55291165	7.44467	1.68488	-2.14356	Q9LJ91 Gb|AAD31369.1 n=2 Tax=Arabidopsis thaliana RepID=Q9LJ91_ARATH			Glyma08g40680	Gm08:40411638-40413191	9.86765	59.4264	2.59033	I1KXP4 Thioredoxin n=1 Tax=Glycine max RepID=I1KXP4_SOYBN
Glyma01g30350	Gm01:41014087-41016040	48.7325	11.033	-2.14307	G8A2L4 Rhodanese-like family protein-like protein n=1 Tax=Medicago truncatula RepID=G8A2L4_MEDTR			Glyma12g05150	Gm12:3432975-3436225	140.952	850.747	2.59352	G7JEZ7 Cold acclimation protein COR413-PM1 n=1 Tax=Medicago truncatula RepID=G7JEZ7_MEDTR
Glyma02g12430	Gm02:10698403-10703841	3.2181	0.728727	-2.14276	D3GBV1 Reduced leaflet 3 n=1 Tax=Lotus japonicus RepID=D3GBV1_LOTJA			Glyma02g04850	Gm02:3958763-3959871	0.685664	4.14765	2.59672	NA
Glyma18g40280	Gm18:48835136-48835983	39.973	9.05713	-2.1419	B9SZY4 OHP, putative n=1 Tax=Ricinus communis RepID=B9SZY4_RICCO			Glyma02g41430	Gm02:46553111-46556348	9.55298	57.7921	2.59685	Q9FIZ6 Gb|AAD55501.1 n=1 Tax=Arabidopsis thaliana RepID=Q9FIZ6_ARATH
Glyma20g23740	Gm20:33503669-33507889	10.9074	2.47154	-2.14182	G7IE86 Pentatricopeptide repeat-containing protein n=1 Tax=Medicago truncatula RepID=G7IE86_MEDTR			Glyma18g01180	Gm18:600380-605699	7.58467	45.9819	2.59991	G7JC16 U-box domain-containing protein n=1 Tax=Medicago truncatula RepID=G7JC16_MEDTR
Glyma11g19370	Gm11:16058553-16061089	11.2637	2.55514	-2.1402	NA			Glyma06g14680	Gm06:11513107-11514125	0.764591	4.63824	2.60082	Q940U2 AT5g05220/K18I23_2 n=2 Tax=Arabidopsis thaliana RepID=Q940U2_ARATH
Glyma08g40970	Gm08:40936192-40938680	32.2945	7.33166	-2.13908	B9S292 Homeobox protein, putative n=1 Tax=Ricinus communis RepID=B9S292_RICCO			Glyma19g40100	Gm19:46563469-46567022	1.45374	8.81922	2.60089	B9RTB3 Polygalacturonase, putative n=1 Tax=Ricinus communis RepID=B9RTB3_RICCO
Glyma19g24420	Gm19:30011814-30015981	11.6705	2.65044	-2.13857	B9RBN5 Ankyrin repeat-containing protein, putative n=1 Tax=Ricinus communis RepID=B9RBN5_RICCO			Glyma06g42935	Gm06:46235245-46239928	2.13441	12.9612	2.60228	NA
Glyma18g48126	Gm18:57632976-57637038	5.74804	1.30556	-2.1384	G7KSG4 Transcription factor NAI1 n=2 Tax=Medicago truncatula RepID=G7KSG4_MEDTR			Glyma14g09680	Gm14:7745841-7750107	6.76356	41.1117	2.60369	B9R724 Acyl-CoA-binding protein, acbp, putative n=1 Tax=Ricinus communis RepID=B9R724_RICCO
Glyma15g43110	Gm15:50670067-50672084	119.345	27.1494	-2.13615	G7IWU5 Photosystem II 5 kDa protein n=1 Tax=Medicago truncatula RepID=G7IWU5_MEDTR			Glyma16g25110	Gm16:29050695-29053197	5.61384	34.1634	2.60539	C6ZS35 Resistance protein n=1 Tax=Glycine max RepID=C6ZS35_SOYBN
Glyma15g18110	Gm15:14628376-14633195	3.05442	0.695896	-2.13395	Q9LU73 Clp amino terminal domain-containing protein n=2 Tax=Arabidopsis thaliana RepID=Q9LU73_ARATH			Glyma03g37940	Gm03:44408647-44410652	4.70663	28.6677	2.60666	Q2PJR7 WRKY51 n=1 Tax=Glycine max RepID=Q2PJR7_SOYBN
Glyma18g04610	Gm18:3384223-3387019	1.82848	0.41668	-2.13363	G7KG39 Cysteine-rich repeat secretory protein n=1 Tax=Medicago truncatula RepID=G7KG39_MEDTR			Glyma17g08270	Gm17:6136696-6138551	17.9806	109.564	2.60726	B0I554 Protein kinase n=1 Tax=Phaseolus vulgaris RepID=B0I554_PHAVU
Glyma16g21970	Gm16:25365536-25375420	2.45139	0.559718	-2.13083	G7K2N1 Diacylglycerol O-acyltransferase n=1 Tax=Medicago truncatula RepID=G7K2N1_MEDTR			Glyma05g15870	Gm05:17776062-17782886	5.47002	33.3316	2.60727	G7K7Z2 Calcium-binding protein CML24 n=1 Tax=Medicago truncatula RepID=G7K7Z2_MEDTR
Glyma20g35780	Gm20:43998527-44002661	2.30872	0.527582	-2.12963	Q9LXB0 AT5g10580/F12B17_70 n=1 Tax=Arabidopsis thaliana RepID=Q9LXB0_ARATH			Glyma02g03870	Gm02:3107194-3111912	7.64852	46.6719	2.6093	C7A2A0 Mitochondrial benzaldehyde dehydrogenase n=1 Tax=Antirrhinum majus RepID=C7A2A0_ANTMA
Glyma17g02570	Gm17:1667540-1670050	40.0389	9.15309	-2.12907	G7ISK0 Tubby-like F-box protein n=1 Tax=Medicago truncatula RepID=G7ISK0_MEDTR			Glyma14g10290	Gm14:8457319-8462166	19.4251	118.551	2.60951	Q8GSM9 Squalene monooxygenase 2 n=1 Tax=Medicago truncatula RepID=Q8GSM9_MEDTR
Glyma12g03580	Gm12:2387697-2391706	12.8908	2.95043	-2.12734	Q9ARG2 Amino acid transporter n=1 Tax=Glycine max RepID=Q9ARG2_SOYBN			Glyma01g35480	Gm01:47964085-47972060	12.0628	73.6605	2.61032	B3V945 PAE n=1 Tax=Litchi chinensis RepID=B3V945_LITCN
Glyma04g37330	Gm04:43690673-43693491	11.2723	2.58366	-2.12529	G7J3V7 Thylakoid lumenal 17.9 kDa protein n=1 Tax=Medicago truncatula RepID=G7J3V7_MEDTR			Glyma09g30300	Gm09:37144023-37145489	3.06741	18.7564	2.61229	G7KQC0 Mitogen-activated protein kinase kinase n=1 Tax=Medicago truncatula RepID=G7KQC0_MEDTR
Glyma01g00640	Gm01:380015-381810	6.28501	1.44147	-2.12437	G7KJ88 Pentatricopeptide repeat-containing protein n=1 Tax=Medicago truncatula RepID=G7KJ88_MEDTR			Glyma06g09220	Gm06:6783040-6788516	4.28691	26.2392	2.61371	I1K9G4 Malic enzyme n=1 Tax=Glycine max RepID=I1K9G4_SOYBN
Glyma10g00720	Gm10:462388-473773	10.4092	2.3898	-2.1229	G7IJI7 Pho1-like protein n=1 Tax=Medicago truncatula RepID=G7IJI7_MEDTR			Glyma02g10490	Gm02:8378357-8379415	0.65843	4.03025	2.61377	G7KVQ2 Zinc finger protein n=1 Tax=Medicago truncatula RepID=G7KVQ2_MEDTR
Glyma15g07190	Gm15:5035712-5038800	1.70704	0.392444	-2.12093	B9SFD5 Nucleoside transporter, putative n=1 Tax=Ricinus communis RepID=B9SFD5_RICCO			Glyma05g25920	Gm05:31975733-31976967	1.11598	6.83257	2.61411	NA
Glyma03g02360	Gm03:2099395-2101353	6.36664	1.46447	-2.12016	G7LCR0 Cysteine-rich receptor-like protein kinase n=1 Tax=Medicago truncatula RepID=G7LCR0_MEDTR			Glyma06g12570	Gm06:9726417-9734008	9.51751	58.3627	2.61639	B9S2Q1 Protein transporter, putative n=1 Tax=Ricinus communis RepID=B9S2Q1_RICCO
Glyma05g29321	Gm05:34994274-34995453	18.4229	4.23958	-2.11951	NA			Glyma19g16680	Gm19:20460623-20469013	6.72167	41.2284	2.61675	B9S7G4 Carboxylesterase np, putative n=1 Tax=Ricinus communis RepID=B9S7G4_RICCO
Glyma17g07640	Gm17:5635318-5636790	13.0605	3.01052	-2.11712	D7MBW4 Transcription factor n=1 Tax=Arabidopsis lyrata subsp. lyrata RepID=D7MBW4_ARALL			Glyma09g03230	Gm09:2279035-2283236	6.27528	38.496	2.61696	G7IMM9 Wall-associated receptor kinase-like protein n=1 Tax=Medicago truncatula RepID=G7IMM9_MEDTR
Glyma09g11740	Gm09:11979887-11981294	25.6291	5.91112	-2.11628	G7IIY0 MTERF-like protein n=1 Tax=Medicago truncatula RepID=G7IIY0_MEDTR			Glyma04g10706	Gm04:8948872-8956608	1.67343	10.2786	2.61877	E0CRP9 Queuine tRNA-ribosyltransferase n=1 Tax=Vitis vinifera RepID=E0CRP9_VITVI
Glyma10g04630	Gm10:3559986-3562554	20.9438	4.83062	-2.11624	I1L8H7 Photosystem II reaction center psb28 protein n=1 Tax=Glycine max RepID=I1L8H7_SOYBN			Glyma19g03786	Gm19:3797177-3802157	15.0913	92.7464	2.61958	B9SNR1 Transcription factor, putative n=1 Tax=Ricinus communis RepID=B9SNR1_RICCO
Glyma09g30061	Gm09:36973372-36974336	5.52155	1.27437	-2.11529	Q5IR72 Zinc finger homeodomain protein SZF-HD1 n=2 Tax=Glycine max RepID=Q5IR72_SOYBN			Glyma20g16920	Gm20:23762131-23763201	16.1699	99.4595	2.6208	G8EVZ9 Ethylene response factor 8 n=1 Tax=Medicago sativa RepID=G8EVZ9_MEDSA
Glyma10g34040	Gm10:42232462-42234126	3.87045	0.893327	-2.11524	Q9FFB5 Emb|CAB89309.1 n=1 Tax=Arabidopsis thaliana RepID=Q9FFB5_ARATH			Glyma14g38010	Gm14:47231176-47234695	12.3286	75.9094	2.62227	B2G284 DNA-binding protein n=1 Tax=Vitis thunbergii RepID=B2G284_9ROSI
Glyma09g08131	Gm09:7190021-7193735	1.95983	0.452413	-2.11502	Q6AWT8 Guanine nucleotide-binding protein subunit gamma 3 n=1 Tax=Arabidopsis thaliana RepID=GG3_ARATH			Glyma12g22880	Gm12:25002456-25004797	1.62305	9.99396	2.62235	Q52QR3 NAC domain protein NAC3 n=1 Tax=Glycine max RepID=Q52QR3_SOYBN
Glyma02g44670	Gm02:49172191-49173777	1.69244	0.390689	-2.11501	G7KCV7 Heat stress transcription factor B-4 n=1 Tax=Medicago truncatula RepID=G7KCV7_MEDTR			Glyma16g06410	Gm16:5779524-5781555	12.0511	74.2897	2.624	B9RBL1 Adenylate kinase 1 chloroplast, putative n=1 Tax=Ricinus communis RepID=B9RBL1_RICCO
Glyma13g23371	Gm13:26781690-26783574	5.77496	1.33343	-2.11467	Q3EBE3 Chlororespiratory reduction 6 n=1 Tax=Arabidopsis thaliana RepID=Q3EBE3_ARATH			Glyma01g22160	Gm01:27743827-27745117	1.67652	10.3559	2.62691	F6KBT1 Allene oxide cyclase 1 n=1 Tax=Glycine max RepID=F6KBT1_SOYBN
Glyma17g01100	Gm17:620199-620703	24.0821	5.56644	-2.11313	NA			Glyma18g52610	Gm18:61172752-61175746	10.3281	63.809	2.62719	D2D321 Heat shock protein 70 n=1 Tax=Gossypium hirsutum RepID=D2D321_GOSHI
Glyma14g33340	Gm14:41143564-41151289	1.10075	0.254521	-2.11263	Q8GUM0 O-fucosyltransferase-like protein n=1 Tax=Arabidopsis thaliana RepID=Q8GUM0_ARATH			Glyma13g04670	Gm13:4965033-4967861	0.426141	2.63569	2.62878	O49858 Cytochrome P450 82A3 n=1 Tax=Glycine max RepID=C82A3_SOYBN
Glyma10g34161	Gm10:42348670-42352705	1.12318	0.259779	-2.11224	G8A1G9 4-coumarate-CoA ligase-like protein n=1 Tax=Medicago truncatula RepID=G8A1G9_MEDTR			Glyma05g04590	Gm05:3756578-3758570	0.406089	2.51257	2.6293	G7JIX2 Aspartic proteinase nepenthesin-2 n=1 Tax=Medicago truncatula RepID=G7JIX2_MEDTR
Glyma02g41760	Gm02:46858036-46859954	1.04215	0.241119	-2.11175	Q7XUK7 OSJNBa0067K08.20 protein n=1 Tax=Oryza sativa Japonica Group RepID=Q7XUK7_ORYSJ			Glyma11g35334	Gm11:37007375-37009560	1.09068	6.75354	2.63041	G7JBB1 Serine/threonine protein kinase-like protein CCR4 n=1 Tax=Medicago truncatula RepID=G7JBB1_MEDTR
Glyma06g11840	Gm06:9146231-9148105	1.93472	0.44809	-2.11027	A8IXG1 Universal stress protein family protein n=1 Tax=Brassica rapa RepID=A8IXG1_BRACM			Glyma09g22306	Gm09:27526719-27530281	80.1005	496.172	2.63096	B9SJ16 Calcium ion binding protein, putative n=1 Tax=Ricinus communis RepID=B9SJ16_RICCO
Glyma04g12660	Gm04:11934346-11937624	0.958026	0.221968	-2.10971	B9GHK5 Tir-nbs resistance protein n=1 Tax=Populus trichocarpa RepID=B9GHK5_POPTR			Glyma20g34210	Gm20:42635890-42639407	3.92866	24.35	2.63182	NA
Glyma02g16490	Gm02:14876881-14878859	4.12583	0.956597	-2.1087	G7IDN1 Senescence-associated protein SAG102 n=1 Tax=Medicago truncatula RepID=G7IDN1_MEDTR			Glyma07g04630	Gm07:3427760-3432821	33.3904	206.99	2.63206	G4XSW2 JAZ2 n=1 Tax=Vitis rupestris RepID=G4XSW2_9ROSI
Glyma18g48230	Gm18:57703525-57705952	10.2849	2.38486	-2.10856	G7KSI0 UDP-glucose glucosyltransferase n=1 Tax=Medicago truncatula RepID=G7KSI0_MEDTR			Glyma13g10460	Gm13:12297502-12299756	3.01952	18.7313	2.63306	B9RYS5 Stellacyanin, putative n=1 Tax=Ricinus communis RepID=B9RYS5_RICCO
Glyma05g15150	Gm05:16428804-16435665	1.80518	0.418781	-2.10788	G7KNL7 Receptor protein kinase-like protein n=1 Tax=Medicago truncatula RepID=G7KNL7_MEDTR			Glyma14g38860	Gm14:48048115-48051411	3.41067	21.1713	2.63398	Q9LF46 2-hydroxyacyl-CoA lyase n=1 Tax=Arabidopsis thaliana RepID=HACL_ARATH
Glyma02g46870	Gm02:50695298-50696963	15.0656	3.49509	-2.10785	G7K4N0 Serine acetyltransferase n=1 Tax=Medicago truncatula RepID=G7K4N0_MEDTR			Glyma07g11160	Gm07:9382709-9385224	6.46097	40.1414	2.63527	Q7XST6 OSJNBa0039K24.20 protein n=2 Tax=Oryza sativa Japonica Group RepID=Q7XST6_ORYSJ
Glyma11g33200	Gm11:34987263-34994137	1.72855	0.401215	-2.10711	G7J7Z5 RCC1 and BTB domain-containing protein n=1 Tax=Medicago truncatula RepID=G7J7Z5_MEDTR			Glyma08g06040	Gm08:4296653-4301417	2.42421	15.0805	2.63709	G7JH33 Transcriptional repressor NF-X1 n=1 Tax=Medicago truncatula RepID=G7JH33_MEDTR
Glyma02g10800	Gm02:8697507-8704551	7.70763	1.78952	-2.10671	Q9C6L8 Aluminum-activated malate transporter 4 n=1 Tax=Arabidopsis thaliana RepID=ALMT4_ARATH			Glyma15g09850	Gm15:7063759-7068119	17.1357	106.836	2.64032	Q7XTT7 OSJNBa0058K23.16 protein n=1 Tax=Oryza sativa Japonica Group RepID=Q7XTT7_ORYSJ
Glyma05g02890	Gm05:2201036-2203328	36.4247	8.45758	-2.1066	G7JMP6 Pectate lyase n=1 Tax=Medicago truncatula RepID=G7JMP6_MEDTR			Glyma17g16741	Gm17:13534941-13538153	0.93579	5.83667	2.64089	G7JGD6 Transcription factor bHLH19 n=1 Tax=Medicago truncatula RepID=G7JGD6_MEDTR
Glyma05g32911	Gm05:37692235-37699556	16.7017	3.87845	-2.10644	G7LFP2 Glutamyl-tRNA(Gln) amidotransferase subunit A n=2 Tax=Medicago truncatula RepID=G7LFP2_MEDTR			Glyma15g00730	Gm15:440382-443695	20.464	127.709	2.6417	G7IMB3 Transcription factor bHLH18 n=1 Tax=Medicago truncatula RepID=G7IMB3_MEDTR
Glyma15g04620	Gm15:3219397-3221269	10.6702	2.47823	-2.1062	Q0PJI3 MYB transcription factor MYB139 n=2 Tax=Glycine max RepID=Q0PJI3_SOYBN			Glyma17g11860	Gm17:8902960-8905996	0.85769	5.35585	2.64259	G7JFE4 Xylogalacturonan beta-1,3-xylosyltransferase n=1 Tax=Medicago truncatula RepID=G7JFE4_MEDTR
Glyma14g36290	Gm14:45520634-45524167	2.28736	0.531398	-2.10582	G7K5Z9 Pentatricopeptide repeat-containing protein n=1 Tax=Medicago truncatula RepID=G7K5Z9_MEDTR			Glyma18g20500	Gm18:22272534-22276851	0.774918	4.85922	2.64861	B9SPH8 Kinase, putative n=1 Tax=Ricinus communis RepID=B9SPH8_RICCO
Glyma06g46740	Gm06:49324567-49328298	3.89315	0.905505	-2.10414	G7LID0 Auxin-induced protein 5NG4 n=2 Tax=Medicago truncatula RepID=G7LID0_MEDTR			Glyma06g02010	Gm06:1284933-1288596	0.702987	4.41211	2.6499	B9R8N8 Serine/threonine-protein kinase cx32, putative n=1 Tax=Ricinus communis RepID=B9R8N8_RICCO
Glyma13g31450	Gm13:33852550-33856854	3.88169	0.902928	-2.104	B9RZ73 Protein binding protein, putative n=1 Tax=Ricinus communis RepID=B9RZ73_RICCO			Glyma05g31390	Gm05:36543162-36553126	2.51079	15.7623	2.65027	I1K4K8 Acyl-coenzyme A oxidase n=1 Tax=Glycine max RepID=I1K4K8_SOYBN
Glyma18g06920	Gm18:5575167-5579443	18.2154	4.23727	-2.10395	Q8GWA1 Alternative NAD(P)H dehydrogenase 1, mitochondrial n=1 Tax=Arabidopsis thaliana RepID=NDA1_ARATH			Glyma07g04850	Gm07:3576315-3577377	2.17603	13.6627	2.65047	B9GXR4 SAUR family protein n=1 Tax=Populus trichocarpa RepID=B9GXR4_POPTR
Glyma04g40325	Gm04:46419551-46424850	1.17343	0.273403	-2.10164	G7K650 Integral membrane protein-like protein n=1 Tax=Medicago truncatula RepID=G7K650_MEDTR			Glyma17g13540	Gm17:10352406-10355700	7.16337	45.0165	2.65174	G7JMM8 Speckle-type POZ protein n=1 Tax=Medicago truncatula RepID=G7JMM8_MEDTR
Glyma03g00330	Gm03:130458-131382	6.16085	1.43595	-2.10113	Q2QYI6 Expressed protein n=2 Tax=Oryza sativa RepID=Q2QYI6_ORYSJ			Glyma07g37280	Gm07:42409917-42411043	1.9432	12.2131	2.65193	B9RTB8 Major allergen Pru ar, putative n=1 Tax=Ricinus communis RepID=B9RTB8_RICCO
Glyma11g29000	Gm11:29505513-29510042	0.867591	0.202329	-2.10031	B9S5C3 Ethylene-overproduction protein, putative n=1 Tax=Ricinus communis RepID=B9S5C3_RICCO			Glyma17g02080	Gm17:1320010-1321987	0.363809	2.28676	2.65205	Q2MHM8 Adenylate isopentenyltransferase n=1 Tax=Pisum sativum RepID=Q2MHM8_PEA
Glyma01g17240	Gm01:21232889-21235373	1.68255	0.392398	-2.10026	B9RD87 Kinase, putative n=1 Tax=Ricinus communis RepID=B9RD87_RICCO			Glyma02g15200	Gm02:13711998-13713705	1.3544	8.51335	2.65207	D7L4F9 Calmodulin-binding protein n=1 Tax=Arabidopsis lyrata subsp. lyrata RepID=D7L4F9_ARALL
Glyma17g06290	Gm17:4473611-4475846	23.0429	5.37439	-2.10015	G7IIE3 GATA transcription factor n=1 Tax=Medicago truncatula RepID=G7IIE3_MEDTR			Glyma05g29450	Gm05:35059372-35062625	1.48924	9.37013	2.65349	G7ILU6 U-box domain-containing protein n=1 Tax=Medicago truncatula RepID=G7ILU6_MEDTR
Glyma10g39950	Gm10:47513190-47516642	6.82645	1.59276	-2.0996	G8A0W3 Cysteine-rich receptor-like protein kinase n=2 Tax=Medicago truncatula RepID=G8A0W3_MEDTR			Glyma13g24200	Gm13:27567217-27569470	12.4343	78.4204	2.65691	Q9SWR5 2-hydroxyisoflavanone synthase n=1 Tax=Glycine max RepID=C93C1_SOYBN
Glyma06g01186	Gm06:739256-743316	2.21234	0.517078	-2.09712	B9RH96 Bel1 homeotic protein, putative n=1 Tax=Ricinus communis RepID=B9RH96_RICCO			Glyma15g37520	Gm15:43374079-43391747	6.70452	42.3142	2.65794	G7KBB5 Cytokinin-O-glucosyltransferase n=1 Tax=Medicago truncatula RepID=G7KBB5_MEDTR
Glyma05g09181	Gm05:8959593-8962679	12.959	3.03311	-2.09509	B9SQ09 Myosin heavy chain, putative n=1 Tax=Ricinus communis RepID=B9SQ09_RICCO			Glyma08g04740	Gm08:3375530-3377200	40.1128	253.314	2.65879	Q9FFJ0 Gb|AAF26109.1 n=1 Tax=Arabidopsis thaliana RepID=Q9FFJ0_ARATH
Glyma02g13980	Gm02:12332716-12339449	13.7489	3.21828	-2.09496	B9RLC9 Rubisco subunit binding-protein beta subunit, rubb, putative n=1 Tax=Ricinus communis RepID=B9RLC9_RICCO			Glyma12g01820	Gm12:1117454-1118670	8.89112	56.1517	2.65889	Q9FIQ3 AIG2-like (Avirulence induced gene) family protein n=1 Tax=Arabidopsis thaliana RepID=Q9FIQ3_ARATH
Glyma08g27380	Gm08:21705440-21706128	17.3407	4.06634	-2.09236	NA			Glyma01g43450	Gm01:54455452-54456397	0.586956	3.7101	2.66013	C9WA67 AP2 domain-containing transcription factor 9 n=1 Tax=Glycine max RepID=C9WA67_SOYBN
Glyma11g20920	Gm11:17745988-17748672	34.3933	8.06972	-2.09154	Q9SV14 AT4g31560 n=1 Tax=Arabidopsis thaliana RepID=Q9SV14_ARATH			Glyma02g15970	Gm02:14416925-14418805	0.850148	5.37405	2.66022	B9SZ60 Prenylated Rab acceptor protein, putative n=1 Tax=Ricinus communis RepID=B9SZ60_RICCO
Glyma19g22660	Gm19:27566608-27571172	15.0594	3.5385	-2.08946	B9RBN5 Ankyrin repeat-containing protein, putative n=1 Tax=Ricinus communis RepID=B9RBN5_RICCO			Glyma12g11466	Gm12:9497259-9506610	2.50889	15.8597	2.66024	NA
Glyma03g29330	Gm03:37317202-37323833	188.047	44.1854	-2.08945	O65808 Magnesium chelatase subunit n=1 Tax=Glycine max RepID=O65808_SOYBN			Glyma18g09327	Gm18:8210210-8218589	0.416704	2.63488	2.66064	C6ZS21 Disease resistance protein n=1 Tax=Glycine max RepID=C6ZS21_SOYBN
Glyma05g36290	Gm05:40142052-40143930	2.56691	0.603603	-2.08836	Q0PJI8 MYB transcription factor MYB127 n=1 Tax=Glycine max RepID=Q0PJI8_SOYBN			Glyma19g36360	Gm19:43663689-43664593	4.46369	28.2378	2.66132	NA
Glyma19g39080	Gm19:45881459-45887185	0.751834	0.17711	-2.08577	B9SDP7 Transferrin receptor protein, putative n=1 Tax=Ricinus communis RepID=B9SDP7_RICCO			Glyma17g36385	Gm17:40344483-40350237	0.165785	1.05049	2.66367	G7J5S7 Mitogen-activated protein kinase kinase kinase n=1 Tax=Medicago truncatula RepID=G7J5S7_MEDTR
Glyma01g42290	Gm01:53574327-53581914	6.74395	1.58939	-2.08512	G7KEV4 1-aminocyclopropane-1-carboxylate synthase n=1 Tax=Medicago truncatula RepID=G7KEV4_MEDTR			Glyma20g16100	Gm20:22282844-22286101	14.0927	89.3303	2.6642	Q5JZR1 N-rich protein n=1 Tax=Glycine max RepID=Q5JZR1_SOYBN
Glyma01g35800	Gm01:48289113-48292398	8.69466	2.05126	-2.08362	G7K406 ABC transporter-like protein n=1 Tax=Medicago truncatula RepID=G7K406_MEDTR			Glyma15g11170	Gm15:8178436-8180984	4.41671	28.0048	2.66463	B9RTU3 Basic 7S globulin 2 small subunit, putative n=1 Tax=Ricinus communis RepID=B9RTU3_RICCO
Glyma15g39701	Gm15:46516733-46517691	7.05241	1.66417	-2.08331	NA			Glyma13g36110	Gm13:37448822-37452872	5.55705	35.243	2.66495	O81972 Cytochrome P450 82A2 n=1 Tax=Glycine max RepID=C82A2_SOYBN
Glyma19g04250	Gm19:4332034-4336073	12.067	2.84754	-2.08329	Q69F95 Cytochrome P450 85A n=1 Tax=Phaseolus vulgaris RepID=C85A_PHAVU			Glyma17g37760	Gm17:41489218-41490300	105.857	672.501	2.66742	G7I774 Gibberellin-regulated protein n=1 Tax=Medicago truncatula RepID=G7I774_MEDTR
Glyma03g33480	Gm03:41050047-41058079	4.77408	1.12677	-2.08303	G7L1Q0 Leucine-rich repeat receptor-like protein kinase n=1 Tax=Medicago truncatula RepID=G7L1Q0_MEDTR			Glyma05g36970	Gm05:40700821-40702765	4.84482	30.8212	2.66941	A7LHG5 WRKY20 (Fragment) n=1 Tax=Glycine max RepID=A7LHG5_SOYBN
Glyma12g11556	Gm12:9638791-9641398	4.96393	1.17172	-2.08285	G7IRN0 GPI-anchored protein, putative n=1 Tax=Medicago truncatula RepID=G7IRN0_MEDTR			Glyma15g08480	Gm15:6001685-6005295	2.24598	14.3031	2.67091	A2Q521 NAC domain-containing protein n=1 Tax=Medicago truncatula RepID=A2Q521_MEDTR
Glyma12g12340	Gm12:10540897-10543037	1.39861	0.330152	-2.08279	B9RKY6 Alpha-expansin 20, putative n=1 Tax=Ricinus communis RepID=B9RKY6_RICCO			Glyma13g24500	Gm13:27864893-27867294	46.1489	294.11	2.67199	Q8H159 Polyubiquitin 10 n=11 Tax=core eudicotyledons RepID=UBQ10_ARATH
Glyma06g45770	Gm06:48496134-48500107	8.92468	2.10774	-2.08211	B9RPM7 Root phototropism protein, putative n=1 Tax=Ricinus communis RepID=B9RPM7_RICCO			Glyma20g35240	Gm20:43489940-43492214	3.11411	19.8765	2.67417	G7I467 Xyloglucan-specific endoglucanase inhibitor protein n=1 Tax=Medicago truncatula RepID=G7I467_MEDTR
Glyma08g47100	Gm08:46026751-46029813	3.28804	0.776939	-2.08136	NA			Glyma18g09340	Gm18:8223482-8226314	1.85312	11.8443	2.67616	C6ZS21 Disease resistance protein n=1 Tax=Glycine max RepID=C6ZS21_SOYBN
Glyma19g26200	Gm19:32811138-32812316	3.64464	0.861554	-2.08076	Q7F2F1 P0402A09.15 protein n=4 Tax=Oryza RepID=Q7F2F1_ORYSJ			Glyma20g21200	Gm20:30312725-30316789	13.4988	86.379	2.67785	G7JVG6 Syntaxin family protein n=1 Tax=Medicago truncatula RepID=G7JVG6_MEDTR
Glyma18g44250	Gm18:53916262-53923870	2.58892	0.612361	-2.0799	G7KX17 Alanine glyoxylate aminotransferase-like protein n=1 Tax=Medicago truncatula RepID=G7KX17_MEDTR			Glyma03g17300	Gm03:21896279-21898584	6.31304	40.4144	2.67846	C8CPQ3 Glyoxal oxidase n=1 Tax=Vitis vinifera RepID=C8CPQ3_VITVI
Glyma15g40250	Gm15:47211952-47213224	59.5982	14.1052	-2.07904	Q9FQE2 Glutathione S-transferase GST 16 n=1 Tax=Glycine max RepID=Q9FQE2_SOYBN			Glyma08g12170	Gm08:8850164-8851706	11.4961	73.5998	2.67856	Q0GPG3 BZIP transcription factor bZIP110 n=2 Tax=Glycine max RepID=Q0GPG3_SOYBN
Glyma09g07770	Gm09:6713468-6715762	6.49609	1.5382	-2.07833	C6ZKH2 ELF4-like protein n=1 Tax=Beta vulgaris RepID=C6ZKH2_BETVU			Glyma06g10710	Gm06:8099723-8101651	15.36	98.3656	2.67898	G7LH86 Phi-1 protein n=1 Tax=Medicago truncatula RepID=G7LH86_MEDTR
Glyma19g40940	Gm19:47220428-47224700	2.08795	0.494843	-2.07705	G7KUM8 Polygalacturonase n=1 Tax=Medicago truncatula RepID=G7KUM8_MEDTR			Glyma03g40730	Gm03:46394042-46398559	9.8387	63.0734	2.68049	Q0GPG5 BZIP transcription factor bZIP105 n=1 Tax=Glycine max RepID=Q0GPG5_SOYBN
Glyma07g01840	Gm07:1224068-1226448	5.19067	1.23067	-2.07648	G7IHZ9 Histidine phosphotransfer protein n=1 Tax=Medicago truncatula RepID=G7IHZ9_MEDTR			Glyma01g01780	Gm01:1342969-1347966	0.744825	4.7816	2.68252	G7KCB0 Cellulose synthase-like protein n=1 Tax=Medicago truncatula RepID=G7KCB0_MEDTR
Glyma05g25790	Gm05:31857535-31870400	8.53216	2.02448	-2.07536	Q9XGC1 Starch synthase, isoform V n=1 Tax=Vigna unguiculata RepID=Q9XGC1_VIGUN			Glyma18g52860	Gm18:61306125-61309923	45.0939	290.172	2.6859	Q9M4A9 Beta-1,3 glucanase n=1 Tax=Pisum sativum RepID=Q9M4A9_PEA
Glyma06g19441	Gm06:15679853-15685064	9.15634	2.17265	-2.07532	G7J5H6 Fibroblast growth factor receptor n=1 Tax=Medicago truncatula RepID=G7J5H6_MEDTR			Glyma13g29240	Gm13:32170443-32174814	9.7381	62.6742	2.68616	Q7XTT7 OSJNBa0058K23.16 protein n=1 Tax=Oryza sativa Japonica Group RepID=Q7XTT7_ORYSJ
Glyma13g38650	Gm13:39402950-39407488	6.64911	1.57838	-2.07472	G7ITV3 Cellulose synthase-like protein H1 n=1 Tax=Medicago truncatula RepID=G7ITV3_MEDTR			Glyma20g34570	Gm20:42943920-42945130	0.876327	5.64296	2.68691	B9SZX0 Ethylene-responsive transcription factor 1B, putative n=1 Tax=Ricinus communis RepID=B9SZX0_RICCO
Glyma11g06960	Gm11:4907302-4912706	17.8872	4.24889	-2.07377	Q43449 G-box binding factor n=1 Tax=Glycine max RepID=Q43449_SOYBN			Glyma08g03910	Gm08:2776808-2778193	2.95083	19.0077	2.68739	G7L848 Ethylene-responsive transcription factor TINY n=1 Tax=Medicago truncatula RepID=G7L848_MEDTR
Glyma19g28990	Gm19:36558228-36561614	75.5701	17.9882	-2.07077	O22349 Tubulin alpha-3 chain n=1 Tax=Eleusine indica RepID=TBA3_ELEIN			Glyma15g40185	Gm15:47167118-47167942	0.693748	4.47098	2.68811	NA
Glyma07g24104	Gm07:26177824-26181511	0.776285	0.184811	-2.07054	B9T7S7 2,4-dihydroxyhept-2-ene-1,7-dioic acid aldolase, putative n=1 Tax=Ricinus communis RepID=B9T7S7_RICCO			Glyma20g24810	Gm20:34452631-34454918	1.51206	9.75151	2.68911	O24315 Cinnamate 4-hydroxylase n=2 Tax=Phaseolus vulgaris RepID=O24315_PHAVU
Glyma14g06230	Gm14:4503418-4507875	34.784	8.29103	-2.0688	G7IAB0 Ser-thr protein kinase n=1 Tax=Medicago truncatula RepID=G7IAB0_MEDTR			Glyma11g09330	Gm11:6635024-6639238	4.01965	25.9511	2.69065	A9YVC3 3-hydroxy-3-methylglutaryl coenzyme A reductase n=2 Tax=Medicago truncatula RepID=A9YVC3_MEDTR
Glyma07g09160	Gm07:7632599-7637413	8.23407	1.96387	-2.06791	G7ZXN0 Cytochrome P450 monooxygenase CYP704G7 n=2 Tax=Medicago truncatula RepID=G7ZXN0_MEDTR			Glyma03g35570	Gm03:42734453-42736887	0.44474	2.8775	2.69378	B9SX20 NAC domain-containing protein, putative n=1 Tax=Ricinus communis RepID=B9SX20_RICCO
Glyma18g05460	Gm18:4139005-4142519	12.7707	3.04761	-2.06709	D7KZK2 Integral membrane family protein n=1 Tax=Arabidopsis lyrata subsp. lyrata RepID=D7KZK2_ARALL			Glyma01g36770	Gm01:49207142-49211246	13.8568	89.9877	2.69913	G7JXM9 Aspartic proteinase-like protein n=1 Tax=Medicago truncatula RepID=G7JXM9_MEDTR
Glyma19g01450	Gm19:1065309-1069173	21.9998	5.25043	-2.06698	B9RUD0 Auxin-induced protein 5NG4, putative n=1 Tax=Ricinus communis RepID=B9RUD0_RICCO			Glyma09g35160	Gm09:41350957-41353603	5.75309	37.3648	2.69927	NA
Glyma10g36520	Gm10:44634164-44639320	14.5407	3.47099	-2.06667	Q9M9H4 F14O23.10 protein n=1 Tax=Arabidopsis thaliana RepID=Q9M9H4_ARATH			Glyma08g06251	Gm08:4443484-4444086	6.44686	41.8731	2.69936	G7J9J7 F-box/LRR-repeat protein n=2 Tax=Medicago truncatula RepID=G7J9J7_MEDTR
Glyma07g11310	Gm07:9498721-9503453	61.3678	14.6542	-2.06616	B9T4F7 Beta-glucosidase, putative n=1 Tax=Ricinus communis RepID=B9T4F7_RICCO			Glyma02g46670	Gm02:50564830-50567593	1.28768	8.37316	2.701	G7K4D4 MAP kinase-like protein n=1 Tax=Medicago truncatula RepID=G7K4D4_MEDTR
Glyma03g00390	Gm03:178077-181593	3.17001	0.757046	-2.06603	B9T0N4 Acid phosphatase 1, putative n=1 Tax=Ricinus communis RepID=B9T0N4_RICCO			Glyma16g01430	Gm16:1018293-1019361	1.90934	12.425	2.7021	B9GXR4 SAUR family protein n=1 Tax=Populus trichocarpa RepID=B9GXR4_POPTR
Glyma10g30940	Gm10:39538522-39540018	48.1543	11.5152	-2.06412	Q8GSL0 Phosphoenolpyruvate carboxylase kinase n=1 Tax=Glycine max RepID=Q8GSL0_SOYBN			Glyma06g10660	Gm06:8051308-8061649	9.86422	64.2237	2.70283	G7J3X8 F-box protein n=1 Tax=Medicago truncatula RepID=G7J3X8_MEDTR
Glyma17g37910	Gm17:41646097-41656243	7.76066	1.85672	-2.06342	G7I7S5 GDSL esterase/lipase n=1 Tax=Medicago truncatula RepID=G7I7S5_MEDTR			Glyma17g11490	Gm17:8634643-8635962	0.333643	2.17274	2.70314	E5GCC5 Serine-rich protein n=1 Tax=Cucumis melo subsp. melo RepID=E5GCC5_CUCME
Glyma02g47350	Gm02:50955218-50962817	34.8212	8.34381	-2.06119	G7K4U9 Amino acid permease n=1 Tax=Medicago truncatula RepID=G7K4U9_MEDTR			Glyma11g10281	Gm11:7392796-7397137	3.09597	20.1648	2.70338	B9GQ40 Lysine/histidine transporter n=1 Tax=Populus trichocarpa RepID=B9GQ40_POPTR
Glyma12g34570	Gm12:37729422-37732647	833.651	199.767	-2.06112	O24482 Sali3-2 n=1 Tax=Glycine max RepID=O24482_SOYBN			Glyma08g42400	Gm08:42390382-42398119	15.9483	103.92	2.70399	I1KY39 Citrate synthase n=1 Tax=Glycine max RepID=I1KY39_SOYBN
Glyma05g34220	Gm05:38605562-38609008	5.66149	1.35772	-2.06	Q9LV18 Emb|CAA16536.1 n=1 Tax=Arabidopsis thaliana RepID=Q9LV18_ARATH			Glyma06g45547	Gm06:48294811-48296323	0.639291	4.16755	2.70465	Q0PJC4 MYB transcription factor MYB117 (Fragment) n=1 Tax=Glycine max RepID=Q0PJC4_SOYBN
Glyma10g29721	Gm10:38500770-38504840	6.59066	1.581	-2.05958	C6ZRT6 Protein kinase n=2 Tax=Glycine max RepID=C6ZRT6_SOYBN			Glyma16g01640	Gm16:1208339-1211609	4.26164	27.7943	2.70531	Q43111 Pectinesterase 3 n=1 Tax=Phaseolus vulgaris RepID=PME3_PHAVU
Glyma11g31830	Gm11:33177944-33181967	9.00297	2.16155	-2.05834	D7KZK2 Integral membrane family protein n=1 Tax=Arabidopsis lyrata subsp. lyrata RepID=D7KZK2_ARALL			Glyma01g09460	Gm01:11555183-11556227	3.13975	20.4818	2.70562	NA
Glyma03g17330	Gm03:21954728-21959644	1.61076	0.386758	-2.05824	Q851G7 Expressed protein n=1 Tax=Oryza sativa Japonica Group RepID=Q851G7_ORYSJ			Glyma15g37535	Gm15:43374079-43391747	3.21038	20.9741	2.70779	B7FMX0 NADPH:quinone oxidoreductase n=1 Tax=Medicago truncatula RepID=B7FMX0_MEDTR
Glyma15g30110	Gm15:33273909-33275199	21.9064	5.26498	-2.05685	G7L8F9 MLP-like protein n=1 Tax=Medicago truncatula RepID=G7L8F9_MEDTR			Glyma08g01090	Gm08:628362-630500	0.783069	5.11691	2.70806	NA
Glyma17g17710	Gm17:14736562-14739070	1.0972	0.263702	-2.05685	G7JCU8 GRAS family transcription factor n=1 Tax=Medicago truncatula RepID=G7JCU8_MEDTR			Glyma11g09192	Gm11:6507578-6508681	9.60707	62.7902	2.70837	G7K191 Proton-coupled amino acid transporter n=1 Tax=Medicago truncatula RepID=G7K191_MEDTR
Glyma05g00730	Gm05:382097-384936	12.811	3.0791	-2.05681	B9RLT7 Dimethylaniline monooxygenase, putative n=1 Tax=Ricinus communis RepID=B9RLT7_RICCO			Glyma01g37010	Gm01:49392804-49394717	4.46596	29.2435	2.71107	G7JXI1 Thiosulfate sulfurtransferase n=1 Tax=Medicago truncatula RepID=G7JXI1_MEDTR
Glyma11g15400	Gm11:11009157-11010986	4.75753	1.14459	-2.05538	B9SYN0 Chloroplast-targeted copper chaperone, putative n=1 Tax=Ricinus communis RepID=B9SYN0_RICCO			Glyma18g00643	Gm18:276954-280902	0.0845755	0.553864	2.71122	Q2Z1Z1 Hypothetical salt-inducible protein (Fragment) n=1 Tax=Prunus mume RepID=Q2Z1Z1_PRUMU
Glyma18g52260	Gm18:60913038-60916109	2.08184	0.50102	-2.05492	G7I3E6 Lysine-specific demethylase 5C n=1 Tax=Medicago truncatula RepID=G7I3E6_MEDTR			Glyma14g11920	Gm14:10467576-10470309	2.38691	15.6455	2.71253	B0LUR8 Transcription factor n=1 Tax=Glycine max RepID=B0LUR8_SOYBN
Glyma01g01000	Gm01:652294-658333	8.05516	1.93887	-2.0547	D7LZB3 Peptidase M28 family protein n=1 Tax=Arabidopsis lyrata subsp. lyrata RepID=D7LZB3_ARALL			Glyma16g03011	Gm16:2583258-2587998	6.2506	40.9869	2.7131	G7L419 GH3 family protein n=1 Tax=Medicago truncatula RepID=G7L419_MEDTR
Glyma09g07990	Gm09:7003260-7005873	4.15831	1.00114	-2.05436	G7L6U2 GRL2 n=1 Tax=Medicago truncatula RepID=G7L6U2_MEDTR			Glyma08g22190	Gm08:16879872-16883505	8.909	58.4426	2.71369	P13088 Auxin-induced protein AUX22 n=1 Tax=Glycine max RepID=AUX22_SOYBN
Glyma07g18030	Gm07:17800428-17804869	2.60758	0.627901	-2.0541	B9SLM8 ATP binding protein, putative n=1 Tax=Ricinus communis RepID=B9SLM8_RICCO			Glyma13g05480	Gm13:5801462-5804791	0.542112	3.55695	2.71398	Q0GLC4 Dof27 n=1 Tax=Glycine max RepID=Q0GLC4_SOYBN
Glyma11g27280	Gm11:26913386-26918010	31.217	7.51938	-2.05365	Q8GWA1 Alternative NAD(P)H dehydrogenase 1, mitochondrial n=1 Tax=Arabidopsis thaliana RepID=NDA1_ARATH			Glyma08g13900	Gm08:10123631-10128603	1.25683	8.2498	2.71457	G7J350 E3 ubiquitin-protein ligase RGLG2 n=1 Tax=Medicago truncatula RepID=G7J350_MEDTR
Glyma08g23670	Gm08:18037728-18040682	6.04464	1.45783	-2.05183	B9RYL5 Ubiquitin-protein ligase, putative n=1 Tax=Ricinus communis RepID=B9RYL5_RICCO			Glyma14g07320	Gm14:5486470-5487638	3.71264	24.3718	2.71469	Q8S8S3 DVL11 n=2 Tax=Arabidopsis RepID=Q8S8S3_ARATH
Glyma14g09120	Gm14:7124434-7129069	4.76667	1.15001	-2.05133	Q8L8T7 Cold regulated protein 27 n=1 Tax=Arabidopsis thaliana RepID=Q8L8T7_ARATH			Glyma18g00630	Gm18:266877-268791	16.2173	106.574	2.71624	G7JAU7 Xyloglucan endotransglycosylase/hydrolase XTH-21 n=1 Tax=Medicago truncatula RepID=G7JAU7_MEDTR
Glyma11g01780	Gm11:1062138-1067959	7.61786	1.83927	-2.05025	G7K989 Zinc finger CCCH domain-containing protein n=1 Tax=Medicago truncatula RepID=G7K989_MEDTR			Glyma17g35815	Gm17:39813503-39816813	0.587434	3.86373	2.7175	G7I2D2 Protein ssh4 n=1 Tax=Medicago truncatula RepID=G7I2D2_MEDTR
Glyma12g04670	Gm12:3085314-3088311	81.428	19.6733	-2.04929	G7JHB9 BHLH transcription factor n=1 Tax=Medicago truncatula RepID=G7JHB9_MEDTR			Glyma18g43460	Gm18:52983820-52987086	12.4045	81.6708	2.71895	Q84V95 Pyruvate decarboxylase 1 n=1 Tax=Lotus corniculatus RepID=Q84V95_LOTCO
Glyma05g26390	Gm05:32372023-32378499	2.42593	0.586588	-2.04812	B9RZX1 Polygalacturonase, putative n=1 Tax=Ricinus communis RepID=B9RZX1_RICCO			Glyma03g16450	Gm03:20914928-20917318	1.03938	6.85296	2.721	NA
Glyma16g08300	Gm16:7566572-7576908	3.45471	0.835403	-2.04802	G7L7T8 GMC-type oxidoreductase, putative n=1 Tax=Medicago truncatula RepID=G7L7T8_MEDTR			Glyma14g05270	Gm14:3725399-3733896	3.12839	20.6358	2.72166	G7K7I8 Subtilisin-like protease n=1 Tax=Medicago truncatula RepID=G7K7I8_MEDTR
Glyma08g06130	Gm08:4349263-4351322	3.14243	0.759905	-2.04799	B9T7S4 Nucleic acid binding protein, putative n=1 Tax=Ricinus communis RepID=B9T7S4_RICCO			Glyma01g40010	Gm01:51813387-51815770	1.86556	12.3123	2.72242	G7K3V2 LOB domain-containing protein n=1 Tax=Medicago truncatula RepID=G7K3V2_MEDTR
Glyma06g22840	Gm06:19726307-19732117	2.62749	0.635958	-2.04668	G7IT11 WD repeat-containing protein n=1 Tax=Medicago truncatula RepID=G7IT11_MEDTR			Glyma02g41810	Gm02:46911508-46916960	7.01485	46.3621	2.72446	B9SE02 Serine/threonine-protein kinase Nek8, putative n=1 Tax=Ricinus communis RepID=B9SE02_RICCO
Glyma10g12370	Gm10:13372222-13373218	66.6063	16.123	-2.04653	D7LHZ7 Expressed protein n=1 Tax=Arabidopsis lyrata subsp. lyrata RepID=D7LHZ7_ARALL			Glyma09g32200	Gm09:38769538-38770121	6.71335	44.3938	2.72525	G7KNJ1 Arabinogalactan peptide n=1 Tax=Medicago truncatula RepID=G7KNJ1_MEDTR
Glyma07g17490	Gm07:17201064-17203120	1.27497	0.308699	-2.04619	D7M754 Glycine-rich protein n=1 Tax=Arabidopsis lyrata subsp. lyrata RepID=D7M754_ARALL			Glyma10g28990	Gm10:37890878-37894294	0.258229	1.71086	2.728	B6UE51 Calmodulin binding protein n=1 Tax=Zea mays RepID=B6UE51_MAIZE
Glyma17g06660	Gm17:4756564-4760568	39.6134	9.60095	-2.04474	G7JUA6 Zinc finger protein CONSTANS-like protein n=1 Tax=Medicago truncatula RepID=G7JUA6_MEDTR			Glyma17g10450	Gm17:7844074-7847765	13.6274	90.2935	2.72811	Q9FRU5 Nitrate transporter NRT1-2 n=1 Tax=Glycine max RepID=Q9FRU5_SOYBN
Glyma07g32550	Gm07:37427500-37430163	6.7337	1.63488	-2.04221	P93162 Magnesium-chelatase subunit ChlI, chloroplastic n=1 Tax=Glycine max RepID=CHLI_SOYBN			Glyma07g30800	Gm07:35759180-35762424	4.80268	31.8432	2.72907	Q9LPZ7 T23J18.4 n=1 Tax=Arabidopsis thaliana RepID=Q9LPZ7_ARATH
Glyma05g23710	Gm05:29436424-29439180	58.1741	14.1286	-2.04176	Q93ZB1 Protein LOL1 n=1 Tax=Arabidopsis thaliana RepID=LOL1_ARATH			Glyma06g40690	Gm06:43857935-43861836	0.479409	3.17953	2.72949	C6ZS29 TIR-NBS-LRR type disease resistance protein n=1 Tax=Glycine max RepID=C6ZS29_SOYBN
Glyma04g03160	Gm04:2310386-2313199	2.59948	0.631351	-2.04171	B9R804 Bel1 homeotic protein, putative n=1 Tax=Ricinus communis RepID=B9R804_RICCO			Glyma02g13470	Gm02:11779258-11782468	1.14107	7.56889	2.7297	G7JY51 Kinase-like protein n=1 Tax=Medicago truncatula RepID=G7JY51_MEDTR
Glyma10g39560	Gm10:47216475-47218247	1.48679	0.361203	-2.04132	NA			Glyma01g39860	Gm01:51704330-51708072	2.08622	13.84	2.72988	B9SNB4 Protein phosphatase 2c, putative n=1 Tax=Ricinus communis RepID=B9SNB4_RICCO
Glyma04g07715	Gm04:6035910-6038477	4.28342	1.04073	-2.04116	NA			Glyma05g13621	Gm05:14227885-14235133	0.556673	3.69456	2.7305	B9RE37 X-linked inhibitor of apoptosis protein, xiap, putative n=1 Tax=Ricinus communis RepID=B9RE37_RICCO
Glyma05g01990	Gm05:1434627-1436628	1.34092	0.325963	-2.04044	G7JNT9 RING finger protein n=1 Tax=Medicago truncatula RepID=G7JNT9_MEDTR			Glyma02g18260	Gm02:16871234-16872691	1.19942	7.98505	2.73497	Q75GV2 Expressed protein n=3 Tax=Oryza sativa RepID=Q75GV2_ORYSJ
Glyma06g14830	Gm06:11620131-11622066	11.4949	2.79486	-2.04014	B9S4E7 RING-H2 finger protein ATL3C, putative n=1 Tax=Ricinus communis RepID=B9S4E7_RICCO			Glyma11g07090	Gm11:4985371-4987758	0.770156	5.12762	2.73507	B9SZL0 Sugar transporter, putative n=1 Tax=Ricinus communis RepID=B9SZL0_RICCO
Glyma08g01060	Gm08:605102-609992	15.0531	3.66433	-2.03843	G7LIT9 Magnesium-protoporphyrin O-methyltransferase n=1 Tax=Medicago truncatula RepID=G7LIT9_MEDTR			Glyma13g33580	Gm13:35372317-35380216	26.2958	175.077	2.73509	D7L359 Integral membrane single C2 domain protein n=1 Tax=Arabidopsis lyrata subsp. lyrata RepID=D7L359_ARALL
Glyma18g41350	Gm18:50205414-50207308	15.2729	3.71842	-2.03822	Q9FQE7 Glutathione S-transferase GST 11 n=1 Tax=Glycine max RepID=Q9FQE7_SOYBN			Glyma13g41340	Gm13:41662422-41664183	3.31305	22.0794	2.73647	G7JCE1 RING finger protein n=1 Tax=Medicago truncatula RepID=G7JCE1_MEDTR
Glyma06g45554	Gm06:48304082-48306474	2.72932	0.66652	-2.03382	G7IRM3 MYB transcription factor n=1 Tax=Medicago truncatula RepID=G7IRM3_MEDTR			Glyma06g18830	Gm06:15089192-15091259	1.94014	12.9359	2.73715	B9RAW1 R2r3-myb transcription factor, putative n=1 Tax=Ricinus communis RepID=B9RAW1_RICCO
Glyma08g22660	Gm08:17195397-17197788	16.2301	3.96385	-2.0337	F4K464 Tetratricopeptide repeat domain-containing protein n=1 Tax=Arabidopsis thaliana RepID=F4K464_ARATH			Glyma15g42740	Gm15:50166496-50166982	21.194	141.429	2.73835	E0A2W1 AN1-like transcription factor n=1 Tax=Glycine max RepID=E0A2W1_SOYBN
Glyma18g35220	Gm18:41366869-41370572	21.5828	5.27428	-2.03284	G7JKB4 1-aminocyclopropane-1-carboxylate oxidase-like protein n=1 Tax=Medicago truncatula RepID=G7JKB4_MEDTR			Glyma05g10130	Gm05:10173326-10183293	0.261995	1.75339	2.74254	G7LGD8 2,3-bisphosphoglycerate-dependent phosphoglycerate mutase n=1 Tax=Medicago truncatula RepID=G7LGD8_MEDTR
Glyma12g01090	Gm12:613592-614505	30.1453	7.37466	-2.03128	Q10PY2 Expressed protein n=1 Tax=Oryza sativa Japonica Group RepID=Q10PY2_ORYSJ			Glyma02g46030	Gm02:50123441-50124142	3.29727	22.0947	2.74436	NA
Glyma18g03030	Gm18:1981052-1986338	38.4705	9.42605	-2.02903	G7JBS8 Chaperone protein clpB n=1 Tax=Medicago truncatula RepID=G7JBS8_MEDTR			Glyma17g35860	Gm17:39839676-39840892	2.04749	13.7242	2.7448	Q7Y0Y9 Dehydration responsive element binding protein n=1 Tax=Glycine max RepID=Q7Y0Y9_SOYBN
Glyma07g21150	Gm07:21583819-21584521	141.189	34.6004	-2.02877	B9R7K1 Plastoquinol-plastocyanin reductase, putative n=1 Tax=Ricinus communis RepID=B9R7K1_RICCO			Glyma14g38570	Gm14:47699934-47706202	0.562532	3.77769	2.7475	B9SD87 RAB6-interacting protein, putative n=1 Tax=Ricinus communis RepID=B9SD87_RICCO
Glyma05g28940	Gm05:34657153-34662588	12.2336	2.99826	-2.02866	B9T1E8 Peptidyl-tRNA hydrolase, putative n=1 Tax=Ricinus communis RepID=B9T1E8_RICCO			Glyma06g07160	Gm06:5190529-5194295	0.551167	3.70424	2.74862	G7JB14 SYNC1 protein n=1 Tax=Medicago truncatula RepID=G7JB14_MEDTR
Glyma03g28060	Gm03:35913438-35917493	4.53536	1.11252	-2.02738	B9S3Q9 Serine carboxypeptidase, putative n=1 Tax=Ricinus communis RepID=B9S3Q9_RICCO			Glyma09g01390	Gm09:852142-854395	11.4393	76.9178	2.74931	G7IP86 Auxin-induced in root cultures protein n=1 Tax=Medicago truncatula RepID=G7IP86_MEDTR
Glyma19g01536	Gm19:1154862-1156699	6.56045	1.60963	-2.02707	NA			Glyma02g41930	Gm02:46995273-46999906	14.2685	96.0648	2.75118	D7LV68 Mitochondrial substrate carrier family protein n=1 Tax=Arabidopsis lyrata subsp. lyrata RepID=D7LV68_ARALL
Glyma02g08940	Gm02:6916334-6928260	16.6539	4.08801	-2.02639	G7IBZ1 Sterol 3-beta-glucosyltransferase n=1 Tax=Medicago truncatula RepID=G7IBZ1_MEDTR			Glyma09g37170	Gm09:42705806-42709793	1.16187	7.84567	2.75544	G7L202 Dof zinc finger protein n=1 Tax=Medicago truncatula RepID=G7L202_MEDTR
Glyma01g38680	Gm01:50767560-50772744	4.8463	1.19015	-2.02574	B9S8S3 Electron transporter, putative n=1 Tax=Ricinus communis RepID=B9S8S3_RICCO			Glyma02g46580	Gm02:50478785-50485818	8.45239	57.2253	2.75922	G7K4B3 Fimbrin-1 n=1 Tax=Medicago truncatula RepID=G7K4B3_MEDTR
Glyma18g53131	Gm18:61476830-61479476	3.36626	0.826834	-2.02548	G7KV75 Protein PLASTID MOVEMENT IMPAIRED n=1 Tax=Medicago truncatula RepID=G7KV75_MEDTR			Glyma15g18620	Gm15:15530776-15533615	1.60904	10.897	2.75967	NA
Glyma19g41700	Gm19:47905829-47909184	5.94394	1.46004	-2.02542	G7I9G3 Pheromone receptor-like protein n=2 Tax=Medicago truncatula RepID=G7I9G3_MEDTR			Glyma19g37410	Gm19:44565095-44567157	2.06759	14.0558	2.76514	A7UQU9 Homeodomain-like n=1 Tax=Medicago truncatula RepID=A7UQU9_MEDTR
Glyma15g41940	Gm15:49136938-49140321	25.343	6.23177	-2.02387	G7IT82 DNA-3-methyladenine glycosylase n=2 Tax=Medicago truncatula RepID=G7IT82_MEDTR			Glyma15g09180	Gm15:6520042-6522934	0.866558	5.89373	2.76581	B9RYY6 Auxin-induced protein 5NG4, putative n=1 Tax=Ricinus communis RepID=B9RYY6_RICCO
Glyma20g23400	Gm20:33282093-33284416	2.32324	0.571583	-2.02311	B9RGI0 Aspartic proteinase nepenthesin-1, putative n=1 Tax=Ricinus communis RepID=B9RGI0_RICCO			Glyma20g23420	Gm20:33300567-33301993	2.73665	18.6389	2.76783	B1Q1N7 Auxin-induced glutathione S transferase n=1 Tax=Prosopis juliflora RepID=B1Q1N7_PROJU
Glyma20g30790	Gm20:39481428-39483514	7.29297	1.79621	-2.02155	Q9LPU4 T22I11.8 n=1 Tax=Arabidopsis thaliana RepID=Q9LPU4_ARATH			Glyma13g02510	Gm13:2396065-2401088	1.71277	11.6827	2.76997	I1LW34 Nitrate reductase n=1 Tax=Glycine max RepID=I1LW34_SOYBN
Glyma12g04320	Gm12:2840104-2846175	3.59963	0.887179	-2.02055	B0LUQ7 Minichromosome maintenance 4 protein n=1 Tax=Pisum sativum RepID=B0LUQ7_PEA			Glyma15g06581	Gm15:4653229-4654722	2.04597	14.0137	2.77598	D9IAI2 Proline/glycine/tyrosine-rich protein n=1 Tax=Glycine max RepID=D9IAI2_SOYBN
Glyma11g06491	Gm11:4571766-4572051	99.9251	24.6332	-2.02024	Q10FB7 Expressed protein n=3 Tax=Oryza sativa RepID=Q10FB7_ORYSJ			Glyma17g18380	Gm17:15748861-15751122	2.50524	17.1757	2.77735	B9R772 Skip-2, putative n=1 Tax=Ricinus communis RepID=B9R772_RICCO
Glyma07g06281	Gm07:5020968-5023545	0.935097	0.230648	-2.01942	G8A087 Pentatricopeptide repeat-containing protein n=1 Tax=Medicago truncatula RepID=G8A087_MEDTR			Glyma18g53440	Gm18:61720442-61721988	10.6224	72.847	2.77777	G7KMR0 LOB domain-containing protein n=1 Tax=Medicago truncatula RepID=G7KMR0_MEDTR
Glyma19g39700	Gm19:46298481-46299475	5.68259	1.40171	-2.01936	NA			Glyma18g45710	Gm18:55422018-55423399	0.995892	6.85259	2.78259	B9RDG0 Copper ion binding protein, putative n=1 Tax=Ricinus communis RepID=B9RDG0_RICCO
Glyma19g33125	Gm19:40766799-40769822	16.8267	4.15452	-2.018	G7KVF9 Thioredoxin-like protein n=1 Tax=Medicago truncatula RepID=G7KVF9_MEDTR			Glyma10g33060	Gm10:41430262-41431854	0.367611	2.53223	2.78416	B9SZX0 Ethylene-responsive transcription factor 1B, putative n=1 Tax=Ricinus communis RepID=B9SZX0_RICCO
Glyma06g06480	Gm06:4630157-4635863	3.825	0.944439	-2.01793	I1K8M4 DNA-directed RNA polymerase n=1 Tax=Glycine max RepID=I1K8M4_SOYBN			Glyma02g37460	Gm02:42766233-42770304	4.49237	30.9643	2.78505	D7M735 Mitochondrial substrate carrier family protein n=1 Tax=Arabidopsis lyrata subsp. lyrata RepID=D7M735_ARALL
Glyma09g32230	Gm09:38780312-38781682	15.5416	3.83864	-2.01747	G7LJB9 PGPS/D10 n=1 Tax=Medicago truncatula RepID=G7LJB9_MEDTR			Glyma10g35481	Gm10:43704336-43707929	3.54047	24.411	2.78552	G7I382 Auxin response factor n=1 Tax=Medicago truncatula RepID=G7I382_MEDTR
Glyma03g38410	Gm03:44760860-44763115	14.7269	3.63846	-2.01706	B7FL77 R2R3-MYB transcription factor n=1 Tax=Medicago truncatula RepID=B7FL77_MEDTR			Glyma02g26480	Gm02:27361667-27363577	4.16241	28.7311	2.78712	B9U5I0 Transcriptional factor NAC20 n=1 Tax=Glycine max RepID=B9U5I0_SOYBN
Glyma05g27320	Gm05:33222211-33223331	5.90974	1.46179	-2.01536	NA			Glyma15g00570	Gm15:289708-291897	3.73444	25.8244	2.78977	Q2PJR9 WRKY27 n=1 Tax=Glycine max RepID=Q2PJR9_SOYBN
Glyma17g36220	Gm17:40203361-40204843	8.82351	2.18373	-2.01456	B9R7F7 Gibberellin receptor GID1, putative n=1 Tax=Ricinus communis RepID=B9R7F7_RICCO			Glyma16g29340	Gm16:33176753-33178509	19.9808	138.188	2.78995	C6ZJB3 UGT2 n=1 Tax=Pueraria montana var. lobata RepID=C6ZJB3_PUEML
Glyma11g31950	Gm11:33264941-33267196	5.9571	1.47441	-2.01447	G7J7V3 Oxygen-evolving enhancer protein 3-2 n=1 Tax=Medicago truncatula RepID=G7J7V3_MEDTR			Glyma13g02220	Gm13:2067120-2068120	1.39679	9.67013	2.79142	NA
Glyma16g31260	Gm16:34677364-34679392	3.90039	0.965829	-2.01378	B9R9B4 Copper ion binding protein, putative n=1 Tax=Ricinus communis RepID=B9R9B4_RICCO			Glyma04g35190	Gm04:41518630-41525560	2.03301	14.0932	2.79331	B9RB53 Trehalose-6-phosphate synthase, putative n=1 Tax=Ricinus communis RepID=B9RB53_RICCO
Glyma08g08990	Gm08:6392657-6395995	2.74713	0.681027	-2.01214	B9S130 Dopamine beta-monooxygenase, putative n=1 Tax=Ricinus communis RepID=B9S130_RICCO			Glyma15g09040	Gm15:6426014-6428275	0.500291	3.47412	2.79581	A5BKH1 CBL-interacting protein kinase 01 n=1 Tax=Vitis vinifera RepID=A5BKH1_VITVI
Glyma09g16841	Gm09:20438333-20441282	12.5299	3.10765	-2.01148	P93743 Expressed protein n=1 Tax=Arabidopsis thaliana RepID=P93743_ARATH			Glyma13g35950	Gm13:37323732-37324830	8.43427	58.6351	2.79743	B7FH70 Centrin-2 n=1 Tax=Medicago truncatula RepID=B7FH70_MEDTR
Glyma14g07670	Gm14:5795097-5797788	5.0123	1.24394	-2.01055	E6NU60 JHL18I08.4 protein n=1 Tax=Jatropha curcas RepID=E6NU60_9ROSI			Glyma06g02210	Gm06:1463861-1470348	1.34484	9.35315	2.79802	B9GQ40 Lysine/histidine transporter n=1 Tax=Populus trichocarpa RepID=B9GQ40_POPTR
Glyma19g35720	Gm19:43211541-43214964	5.14357	1.27687	-2.01016	G7L0M3 Auxin-induced protein 5NG4 n=1 Tax=Medicago truncatula RepID=G7L0M3_MEDTR			Glyma12g23150	Gm12:25414898-25417225	2.61511	18.2155	2.80023	D6BRF0 Stem-specific protein tsjt1, putative n=1 Tax=Jatropha curcas RepID=D6BRF0_9ROSI
Glyma19g42630	Gm19:48551257-48553804	6.40088	1.5895	-2.0097	O80895 Expressed protein n=1 Tax=Arabidopsis thaliana RepID=O80895_ARATH			Glyma06g07800	Gm06:5718425-5724262	12.1762	84.8326	2.80055	G7JC88 RING finger and CHY zinc finger domain-containing protein n=1 Tax=Medicago truncatula RepID=G7JC88_MEDTR
Glyma04g11360	Gm04:9804280-9806306	7.35733	1.82729	-2.00948	G7KA58 Clavesin n=1 Tax=Medicago truncatula RepID=G7KA58_MEDTR			Glyma13g04480	Gm13:4822031-4825620	1.89279	13.2105	2.8031	B9RUD8 Transferase, transferring glycosyl groups, putative n=1 Tax=Ricinus communis RepID=B9RUD8_RICCO
Glyma12g04390	Gm12:2885423-2889443	3.3301	0.82748	-2.00877	Q9M6A7 Nodule autoregulation receptor-like protein kinase n=2 Tax=Glycine max RepID=Q9M6A7_SOYBN			Glyma20g32210	Gm20:40820165-40828801	0.506144	3.53337	2.80342	G7I503 ABC transporter G family member n=1 Tax=Medicago truncatula RepID=G7I503_MEDTR
Glyma11g12690	Gm11:9040109-9041112	15.5956	3.87628	-2.00839	Q9FUP6 Suspensor-specific protein n=1 Tax=Phaseolus coccineus RepID=Q9FUP6_PHACN			Glyma01g40050	Gm01:51861767-51863943	0.252609	1.76408	2.80394	B9SGZ0 N-acetyltransferase, putative n=1 Tax=Ricinus communis RepID=B9SGZ0_RICCO
Glyma18g15970	Gm18:16148713-16151297	27.2554	6.77632	-2.00797	B9S292 Homeobox protein, putative n=1 Tax=Ricinus communis RepID=B9S292_RICCO			Glyma13g42530	Gm13:42482837-42486281	0.307577	2.14795	2.80394	G7IUH2 Beta-fructofuranosidase, cell wall isozyme n=1 Tax=Medicago truncatula RepID=G7IUH2_MEDTR
Glyma09g34791	Gm09:41073653-41079549	4.5337	1.12734	-2.00776	Q84T58 Expressed protein n=2 Tax=Oryza RepID=Q84T58_ORYSJ			Glyma19g03010	Gm19:3124647-3126788	3.72994	26.0663	2.80496	G7KSI0 UDP-glucose glucosyltransferase n=1 Tax=Medicago truncatula RepID=G7KSI0_MEDTR
Glyma03g29710	Gm03:37748017-37756383	18.7596	4.67363	-2.00501	C7SQI9 BHLH transcription factor PTF1 n=1 Tax=Glycine max RepID=C7SQI9_SOYBN			Glyma14g01790	Gm14:1031917-1035014	2.20659	15.4257	2.80544	G7K4P7 Outward rectifying potassium channel n=1 Tax=Medicago truncatula RepID=G7K4P7_MEDTR
Glyma20g24090	Gm20:33786216-33791577	1.23741	0.308318	-2.00483	Q7X997 Bzip-like transcription factor-like n=1 Tax=Oryza sativa Japonica Group RepID=Q7X997_ORYSJ			Glyma10g33100	Gm10:41479930-41482188	1.8073	12.6633	2.80874	G7K2Z4 Adenylate kinase isoenzyme n=2 Tax=Medicago truncatula RepID=G7K2Z4_MEDTR
Glyma19g01400	Gm19:1007373-1014952	21.5684	5.3766	-2.00416	B9RUB7 Potassium transporter, putative n=1 Tax=Ricinus communis RepID=B9RUB7_RICCO			Glyma05g34760	Gm05:38987736-38992239	2.1045	14.746	2.80877	Q9C9T2 Calmodulin binding protein-like protein n=2 Tax=Arabidopsis thaliana RepID=Q9C9T2_ARATH
Glyma05g31110	Gm05:36304762-36307563	3.47715	0.866918	-2.00394	B9T3R4 Abhydrolase domain containing, putative n=1 Tax=Ricinus communis RepID=B9T3R4_RICCO			Glyma13g40820	Gm13:41270518-41272045	19.0164	133.34	2.8098	Q39883 Nodulin-26 n=1 Tax=Glycine max RepID=Q39883_SOYBN
Glyma10g38290	Gm10:46111234-46114552	14.9366	3.72399	-2.00393	B9R9E8 KOM, putative n=1 Tax=Ricinus communis RepID=B9R9E8_RICCO			Glyma03g07121	Gm03:7458626-7491220	1.95068	13.6823	2.81027	B3VTL7 TIR-NBS-LRR RCT1-like resistance protein n=1 Tax=Medicago sativa RepID=B3VTL7_MEDSA
Glyma04g31690	Gm04:35880681-35882596	18.3792	4.5835	-2.00355	Q0GLC9 Dof22 n=1 Tax=Glycine max RepID=Q0GLC9_SOYBN			Glyma10g01200	Gm10:881690-886236	10.903	76.4815	2.81039	C6TDV2 Serine/threonine protein kinase n=1 Tax=Glycine max RepID=C6TDV2_SOYBN
Glyma11g15180	Gm11:10884135-10885737	24.2438	6.04921	-2.0028	G7JTP4 MYB transcription factor n=4 Tax=Medicago truncatula RepID=G7JTP4_MEDTR			Glyma08g02160	Gm08:1472659-1474670	0.510518	3.58432	2.81167	B9RCH8 WRKY transcription factor, putative n=1 Tax=Ricinus communis RepID=B9RCH8_RICCO
Glyma10g05250	Gm10:4065617-4067444	10.0266	2.50318	-2.00199	G7L1N2 Metal ion binding protein n=1 Tax=Medicago truncatula RepID=G7L1N2_MEDTR			Glyma07g39650	Gm07:44070727-44074530	1.93768	13.6058	2.81183	G7JLR5 Chitin-inducible gibberellin-responsive protein n=1 Tax=Medicago truncatula RepID=G7JLR5_MEDTR
Glyma02g13450	Gm02:11770046-11771944	2.78189	0.694767	-2.00146	Q9LQB2 Adenine nucleotide alpha hydrolases-like protein n=1 Tax=Arabidopsis thaliana RepID=Q9LQB2_ARATH			Glyma07g39130	Gm07:43707076-43709629	7.86038	55.4876	2.81949	Q8W1A1 Adenosine 5'-phosphosulfate reductase n=1 Tax=Glycine max RepID=Q8W1A1_SOYBN
Glyma18g18480	Gm18:19887389-19889503	2.58459	0.645746	-2.0009	B9S4M2 Ring finger protein, putative n=1 Tax=Ricinus communis RepID=B9S4M2_RICCO			Glyma18g36840	Gm18:43489982-43493092	17.2051	121.465	2.81963	G7L195 PPPDE peptidase domain-containing protein n=1 Tax=Medicago truncatula RepID=G7L195_MEDTR
Glyma17g33500	Gm17:37398052-37399977	70.502	17.6233	-2.00018	Q84MQ2 Expressed protein n=1 Tax=Oryza sativa Japonica Group RepID=Q84MQ2_ORYSJ			Glyma03g11580	Gm03:14123016-14125308	1.72289	12.1716	2.82062	G7JTE4 Aldose reductase n=1 Tax=Medicago truncatula RepID=G7JTE4_MEDTR
								Glyma03g12230	Gm03:15337483-15340107	0.744092	5.25734	2.82078	Q6UY58 Lectin-like receptor kinase 7;3 n=1 Tax=Medicago truncatula RepID=Q6UY58_MEDTR
								Glyma16g09760	Gm16:9593791-9595077	7.1223	50.3545	2.82171	C5HU39 AIR12 n=1 Tax=Glycine max RepID=C5HU39_SOYBN
								Glyma16g24831	Gm16:28784808-28787349	1.33727	9.47239	2.82444	B5A7G5 Salicylic acid methyl transferase-like protein n=1 Tax=Glycine max RepID=B5A7G5_SOYBN
								Glyma18g46280	Gm18:56037036-56039623	1.40436	9.95725	2.82583	B6TQ19 LysM domain containing protein n=1 Tax=Zea mays RepID=B6TQ19_MAIZE
								Glyma19g40070	Gm19:46539396-46540480	1.63758	11.6153	2.82639	D9ICY5 ERF protein n=1 Tax=Glycine max RepID=D9ICY5_SOYBN
								Glyma18g47361	Gm18:57025965-57028684	21.1929	150.406	2.82721	P46519 Desiccation protectant protein Lea14 homolog n=2 Tax=Glycine max RepID=LEA14_SOYBN
								Glyma12g29471	Gm12:32910759-32914918	3.02297	21.457	2.8274	Q9M1T8 AT3g45210/T14D3_150 n=1 Tax=Arabidopsis thaliana RepID=Q9M1T8_ARATH
								Glyma02g12400	Gm02:10658578-10674443	6.1426	43.6483	2.829	G7JWK0 Membrane protein, putative n=1 Tax=Medicago truncatula RepID=G7JWK0_MEDTR
								Glyma08g43080	Gm08:42949306-42953073	16.6871	118.711	2.83065	G7IY38 GDSL esterase/lipase n=1 Tax=Medicago truncatula RepID=G7IY38_MEDTR
								Glyma04g00600	Gm04:346075-349178	2.82633	20.1164	2.83137	D7MDH3 Nodulin family protein n=1 Tax=Arabidopsis lyrata subsp. lyrata RepID=D7MDH3_ARALL
								Glyma05g33470	Gm05:38106683-38109689	0.466675	3.32193	2.83153	Q8S8Z5 Syringolide-induced protein B13-1-1 (Fragment) n=1 Tax=Glycine max RepID=Q8S8Z5_SOYBN
								Glyma05g02863	Gm05:2185790-2188897	7.88493	56.1428	2.83193	G7JMM8 Speckle-type POZ protein n=1 Tax=Medicago truncatula RepID=G7JMM8_MEDTR
								Glyma04g05904	Gm04:4482764-4490655	0.939825	6.69599	2.83283	A7ISW5 Copper P1B-ATPase n=1 Tax=Glycine max RepID=A7ISW5_SOYBN
								Glyma01g43050	Gm01:54159289-54164847	0.214149	1.52806	2.83501	B9RCG0 Transferase, transferring glycosyl groups, putative n=1 Tax=Ricinus communis RepID=B9RCG0_RICCO
								Glyma05g04380	Gm05:3559577-3560490	2.09899	14.9905	2.83628	G7JJ00 14 kDa proline-rich protein DC2.15 n=1 Tax=Medicago truncatula RepID=G7JJ00_MEDTR
								Glyma06g42180	Gm06:45400836-45402035	54.076	386.696	2.83814	B9SIE5 Cytoplasmic dynein light chain, putative n=1 Tax=Ricinus communis RepID=B9SIE5_RICCO
								Glyma13g01750	Gm13:1447540-1454390	10.5106	75.2205	2.83928	B9RJL5 S-adenosylmethionine-dependent methyltransferase, putative n=1 Tax=Ricinus communis RepID=B9RJL5_RICCO
								Glyma11g36730	Gm11:38084593-38086445	16.9898	121.611	2.83954	G7JAU8 Xyloglucan endotransglycosylase/hydrolase XTH-21 n=1 Tax=Medicago truncatula RepID=G7JAU8_MEDTR
								Glyma19g43650	Gm19:49236483-49239441	3.01136	21.5843	2.84149	Q9M8Z1 AT3g04350/T6K12_3 n=1 Tax=Arabidopsis thaliana RepID=Q9M8Z1_ARATH
								Glyma15g15820	Gm15:12156727-12157886	5.88266	42.1939	2.84249	G7JLH4 Xyloglucan 6-xylosyltransferase n=1 Tax=Medicago truncatula RepID=G7JLH4_MEDTR
								Glyma13g40490	Gm13:41011724-41012638	1.14056	8.18802	2.84378	NA
								Glyma09g37340	Gm09:42909399-42911502	3.97316	28.5324	2.84424	E4W6I5 Transcription factor MYB392 n=1 Tax=Glycine max RepID=E4W6I5_SOYBN
								Glyma13g12340	Gm13:16009146-16010496	0.301606	2.1686	2.84603	NA
								Glyma07g39500	Gm07:43970381-43974673	9.73424	70.0545	2.84734	G7JKI1 Alkaline ceramidase n=1 Tax=Medicago truncatula RepID=G7JKI1_MEDTR
								Glyma04g38270	Gm04:44680352-44684054	6.446	46.4359	2.84877	Q39893 Protein kinase n=1 Tax=Glycine max RepID=Q39893_SOYBN
								Glyma08g22730	Gm08:17244860-17247133	16.6613	120.051	2.84907	G7JGX9 Palmitoyl-monogalactosyldiacylglycerol delta-7 desaturase n=1 Tax=Medicago truncatula RepID=G7JGX9_MEDTR
								Glyma04g04260	Gm04:3166004-3167465	0.410345	2.95845	2.84993	Q00M87 N-hydroxycinnamoyl/benzoyltransferase 3 n=2 Tax=Glycine max RepID=Q00M87_SOYBN
								Glyma06g13985	Gm06:11053510-11054273	0.940784	6.78633	2.8507	NA
								Glyma09g01720	Gm09:1111715-1114521	4.47586	32.3309	2.85268	Q2HV28 C2 n=2 Tax=Medicago truncatula RepID=Q2HV28_MEDTR
								Glyma17g16890	Gm17:13702297-13704618	5.61235	40.5434	2.85279	G7JF94 Xyloglucan endotransglycosylase hydrolase n=1 Tax=Medicago truncatula RepID=G7JF94_MEDTR
								Glyma15g16360	Gm15:12659001-12660720	9.13217	66.0805	2.8552	O04133 SRC2 n=1 Tax=Glycine max RepID=O04133_SOYBN
								Glyma15g24761	Gm15:25934115-25938504	10.5651	76.5882	2.85782	G0ZAL3 Calmodulin-binding protein n=1 Tax=Populus euphratica RepID=G0ZAL3_POPEU
								Glyma05g32756	Gm05:37589564-37596078	6.35251	46.0572	2.85803	D2DF32 PAD4 n=1 Tax=Glycine max RepID=D2DF32_SOYBN
								Glyma15g05220	Gm15:3717944-3727866	5.31419	38.5476	2.85872	Q9LS55 Gb|AAD20392.1 n=1 Tax=Arabidopsis thaliana RepID=Q9LS55_ARATH
								Glyma03g35400	Gm03:42607362-42608262	1.29197	9.37936	2.85992	Q9LZC0 Emb|CAB85509.1 n=1 Tax=Arabidopsis thaliana RepID=Q9LZC0_ARATH
								Glyma13g10360	Gm13:12138249-12141557	4.34825	31.5674	2.85993	B9RYU1 Cystathionine gamma-synthase, putative n=1 Tax=Ricinus communis RepID=B9RYU1_RICCO
								Glyma20g33990	Gm20:42422453-42433818	8.88674	64.5987	2.86178	G7I2L4 Non-lysosomal glucosylceramidase n=1 Tax=Medicago truncatula RepID=G7I2L4_MEDTR
								Glyma19g40090	Gm19:46547960-46552836	22.0412	160.229	2.86186	Q9ZSQ0 Ethylene response sensor n=1 Tax=Vigna radiata RepID=Q9ZSQ0_VIGRA
								Glyma03g14210	Gm03:18155860-18158180	7.72377	56.2096	2.86344	G7JMZ5 BAHD acyltransferase DCR n=1 Tax=Medicago truncatula RepID=G7JMZ5_MEDTR
								Glyma09g25470	Gm09:31726267-31730901	5.59145	40.8342	2.86848	G7IZP1 2-succinylbenzoate-CoA ligase n=1 Tax=Medicago truncatula RepID=G7IZP1_MEDTR
								Glyma06g47740	Gm06:50140894-50142118	47.9092	350.008	2.86901	G7IYJ3 21 kDa protein n=1 Tax=Medicago truncatula RepID=G7IYJ3_MEDTR
								Glyma03g35920	Gm03:42982093-42983339	1.96255	14.349	2.87015	B0ZC11 Hairpin-inducing protein n=1 Tax=Casuarina glauca RepID=B0ZC11_CASGL
								Glyma02g02540	Gm02:1876340-1879742	2.14309	15.6781	2.87099	Q5KSB6 Hypersensitive-induced response protein n=1 Tax=Lotus japonicus RepID=Q5KSB6_LOTJA
								Glyma10g42190	Gm10:49208330-49212352	1.00684	7.37404	2.87262	Q8L7U7 AT4g39670/T19P19_60 n=1 Tax=Arabidopsis thaliana RepID=Q8L7U7_ARATH
								Glyma19g04210	Gm19:4287127-4291807	0.22487	1.64811	2.87365	Q69F98 Phytochelatin synthetase-like protein n=1 Tax=Phaseolus vulgaris RepID=Q69F98_PHAVU
								Glyma06g04210	Gm06:2922388-2927457	2.12791	15.6009	2.87412	E4MXN4 mRNA, clone: RTFL01-28-G13 n=1 Tax=Eutrema halophilum RepID=E4MXN4_THEHA
								Glyma11g05430	Gm11:3791324-3795468	1.83327	13.441	2.87415	B9SNB4 Protein phosphatase 2c, putative n=1 Tax=Ricinus communis RepID=B9SNB4_RICCO
								Glyma14g08120	Gm14:6145654-6151130	10.4213	76.4068	2.87416	B9R7U7 Lrr receptor protein kinase, putative n=1 Tax=Ricinus communis RepID=B9R7U7_RICCO
								Glyma11g04150	Gm11:2759686-2763609	7.02723	51.5552	2.87509	Q43465 Protein kinase 2 n=1 Tax=Glycine max RepID=Q43465_SOYBN
								Glyma13g40501	Gm13:41014106-41014787	0.722083	5.30334	2.87666	NA
								Glyma15g08510	Gm15:6013667-6015218	1.17227	8.626	2.87938	NA
								Glyma03g04480	Gm03:4631612-4634160	1.17525	8.65552	2.88066	Q9LZW3 U-box domain-containing protein 16 n=1 Tax=Arabidopsis thaliana RepID=PUB16_ARATH
								Glyma03g22230	Gm03:28317870-28321102	0.727081	5.36694	2.88391	G7LEF2 Serine/threonine protein kinase OXI1 n=1 Tax=Medicago truncatula RepID=G7LEF2_MEDTR
								Glyma17g24120	Gm17:24367928-24372036	0.719744	5.31688	2.88502	Q2HVC5 2-aminoethanethiol dioxygenase n=1 Tax=Medicago truncatula RepID=Q2HVC5_MEDTR
								Glyma07g30880	Gm07:35835572-35839464	19.8806	146.878	2.88518	Q7XA52 Monosaccharide transporter n=1 Tax=Glycine max RepID=Q7XA52_SOYBN
								Glyma10g02710	Gm10:1933761-1934867	1.0022	7.40481	2.88529	NA
								Glyma08g16310	Gm08:11938065-11938774	52.402	387.258	2.8856	NA
								Glyma06g08250	Gm06:6063557-6066290	12.7035	93.9583	2.8868	G7J2V4 Cation transport regulator-like protein n=1 Tax=Medicago truncatula RepID=G7J2V4_MEDTR
								Glyma07g39320	Gm07:43818692-43824820	11.7965	87.3089	2.88777	G7KK36 Membrane protein, putative n=1 Tax=Medicago truncatula RepID=G7KK36_MEDTR
								Glyma10g37500	Gm10:45475418-45476872	6.27677	46.5102	2.88945	B9RCH3 Metal ion binding protein, putative n=1 Tax=Ricinus communis RepID=B9RCH3_RICCO
								Glyma03g38190	Gm03:44586431-44589302	91.9149	682.879	2.89326	I1JQV8 S-adenosylmethionine synthase n=1 Tax=Glycine max RepID=I1JQV8_SOYBN
								Glyma04g40700	Gm04:46665351-46666191	4.33639	32.2738	2.8958	NA
								Glyma07g38510	Gm07:43226634-43233554	6.82175	50.7992	2.89659	B9RSS7 Big map kinase/bmk, putative n=1 Tax=Ricinus communis RepID=B9RSS7_RICCO
								Glyma15g19840	Gm15:17325877-17328540	45.4173	339.344	2.90144	G7IIQ4 Protein TIFY 10B n=1 Tax=Medicago truncatula RepID=G7IIQ4_MEDTR
								Glyma07g16855	Gm07:16504920-16506099	2.88618	21.5952	2.90348	Q9FQF2 Glutathione S-transferase GST 6 n=1 Tax=Glycine max RepID=Q9FQF2_SOYBN
								Glyma13g05370	Gm13:5665160-5666979	0.632208	4.73316	2.90433	Q0PJD8 MYB transcription factor MYB187 (Fragment) n=1 Tax=Glycine max RepID=Q0PJD8_SOYBN
								Glyma01g38720	Gm01:50799865-50800659	1.13598	8.50498	2.90436	NA
								Glyma12g08160	Gm12:5901032-5907170	1.75508	13.1543	2.90593	G7JND3 CNGC5-like protein n=1 Tax=Medicago truncatula RepID=G7JND3_MEDTR
								Glyma20g24700	Gm20:34358678-34361078	7.51415	56.3676	2.90719	G7ZZA4 Nitrate and chloride transporter n=1 Tax=Medicago truncatula RepID=G7ZZA4_MEDTR
								Glyma15g07010	Gm15:4880692-4884253	1.4105	10.6	2.90979	G7IK44 Transcription factor bHLH112 n=1 Tax=Medicago truncatula RepID=G7IK44_MEDTR
								Glyma18g04770	Gm18:3529878-3531558	0.540894	4.06689	2.91051	Q8S8Z6 Syringolide-induced protein 13-1-1 n=1 Tax=Glycine max RepID=Q8S8Z6_SOYBN
								Glyma15g08360	Gm15:5901426-5903073	0.467509	3.5158	2.91079	G7ISE4 Ethylene responsive transcription factor n=1 Tax=Medicago truncatula RepID=G7ISE4_MEDTR
								Glyma01g00790	Gm01:446961-452958	0.17343	1.30634	2.9131	F4JMW3 Protein root hair specific 16 n=1 Tax=Arabidopsis thaliana RepID=F4JMW3_ARATH
								Glyma03g37970	Gm03:44430842-44434093	0.339542	2.55769	2.91318	D7KB82 Glycerol-3-phosphate acyltransferase 2 n=1 Tax=Arabidopsis lyrata subsp. lyrata RepID=D7KB82_ARALL
								Glyma06g13970	Gm06:11046929-11050187	0.274552	2.06893	2.91373	G7J8A0 Leucine-rich repeat receptor-like protein kinase n=1 Tax=Medicago truncatula RepID=G7J8A0_MEDTR
								Glyma08g27505	Gm08:21809125-21810907	1.21701	9.176	2.91452	Q69FA1 Anthocyanin acyltransferase n=1 Tax=Phaseolus vulgaris RepID=Q69FA1_PHAVU
								Glyma09g35050	Gm09:41280040-41296458	7.3329	55.2886	2.91453	B3V945 PAE n=1 Tax=Litchi chinensis RepID=B3V945_LITCN
								Glyma17g18310	Gm17:15548175-15549112	4.35513	32.8417	2.91474	Q0PJL4 MYB transcription factor MYB61 n=1 Tax=Glycine max RepID=Q0PJL4_SOYBN
								Glyma02g42251	Gm02:47319510-47321510	2.4716	18.6668	2.91696	B5AE23 Nematode resistance HS1pro1 protein n=1 Tax=Glycine max RepID=B5AE23_SOYBN
								Glyma09g23720	Gm09:29360740-29362096	0.317365	2.39775	2.91747	A6XNC2 (Iso)flavonoid glycosyltransferase n=2 Tax=Medicago truncatula RepID=A6XNC2_MEDTR
								Glyma11g02220	Gm11:1388017-1392346	0.81251	6.16694	2.9241	G7KAQ3 Na+/H+ antiporter-like protein n=1 Tax=Medicago truncatula RepID=G7KAQ3_MEDTR
								Glyma01g41640	Gm01:53095729-53098644	0.833145	6.32531	2.9245	Q7XC71 Expressed protein n=1 Tax=Oryza sativa Japonica Group RepID=Q7XC71_ORYSJ
								Glyma20g35440	Gm20:43710982-43713019	4.04361	30.7046	2.92474	Q39890 Calmodulin n=1 Tax=Glycine max RepID=Q39890_SOYBN
								Glyma05g31580	Gm05:36712992-36714422	1.19262	9.07838	2.92831	Q4ABR4 80A08_3 n=1 Tax=Brassica rapa subsp. pekinensis RepID=Q4ABR4_BRARP
								Glyma12g18720	Gm12:19480081-19481061	1.57671	12.0169	2.93007	Q9FN29 Homeobox-leucine zipper protein ATHB-52 n=1 Tax=Arabidopsis thaliana RepID=ATB52_ARATH
								Glyma11g34470	Gm11:36286801-36293261	1.39341	10.6264	2.93096	G7J9Y3 RCC1 and BTB domain-containing protein n=2 Tax=Medicago truncatula RepID=G7J9Y3_MEDTR
								Glyma16g29520	Gm16:33321293-33325497	2.66113	20.3038	2.93164	G7K7L1 Receptor-like kinase n=1 Tax=Medicago truncatula RepID=G7K7L1_MEDTR
								Glyma12g33020	Gm12:36392414-36394715	0.539995	4.1202	2.9317	H2ALZ3 Drought responsive element binding protein 5 n=1 Tax=Glycine max RepID=H2ALZ3_SOYBN
								Glyma06g15500	Gm06:12212050-12214793	2.40483	18.3697	2.93332	B0EW03 Trihelix transcription factor n=1 Tax=Glycine max RepID=B0EW03_SOYBN
								Glyma01g45520	Gm01:55750121-55752248	5.27874	40.326	2.93344	B9RY82 Methylthioribose kinase, putative n=1 Tax=Ricinus communis RepID=B9RY82_RICCO
								Glyma02g01740	Gm02:1261027-1265610	4.5141	34.5319	2.93542	D5FFI0 MYB transcription factor MYB112 n=1 Tax=Medicago truncatula RepID=D5FFI0_MEDTR
								Glyma09g35011	Gm09:41252641-41258203	0.307351	2.35196	2.9359	G7K1A4 Receptor kinase-like protein n=1 Tax=Medicago truncatula RepID=G7K1A4_MEDTR
								Glyma19g29210	Gm19:36800698-36804173	119.567	916.024	2.93756	A9XE62 KS-type dehydrin SLTI629 n=1 Tax=Glycine max RepID=A9XE62_SOYBN
								Glyma11g27820	Gm11:27710400-27712052	0.247501	1.89949	2.94011	G7JZL6 Serine/threonine protein kinase n=1 Tax=Medicago truncatula RepID=G7JZL6_MEDTR
								Glyma10g39390	Gm10:47063520-47067407	2.68863	20.6727	2.94278	G7I7D3 With no lysine kinase n=1 Tax=Medicago truncatula RepID=G7I7D3_MEDTR
								Glyma03g31610	Gm03:39484201-39489704	2.29638	17.6596	2.94302	B9S4T4 Ring finger protein, putative n=1 Tax=Ricinus communis RepID=B9S4T4_RICCO
								Glyma17g12740	Gm17:9647504-9654467	2.57951	19.8488	2.94388	G7JV81 Potassium channel n=1 Tax=Medicago truncatula RepID=G7JV81_MEDTR
								Glyma01g02740	Gm01:2209772-2211864	0.171018	1.31647	2.94445	Q8S9A7 Glucosyltransferase-2 n=1 Tax=Vigna angularis RepID=Q8S9A7_PHAAN
								Glyma13g40180	Gm13:40718792-40721330	10.2171	78.7732	2.94671	B9SWC2 Ubiquitin-protein ligase, putative n=1 Tax=Ricinus communis RepID=B9SWC2_RICCO
								Glyma15g42030	Gm15:49383135-49396247	3.26476	25.1743	2.9469	G7IQR6 Myosin XI-F n=1 Tax=Medicago truncatula RepID=G7IQR6_MEDTR
								Glyma09g34381	Gm09:40762053-40766980	0.12618	0.975142	2.95013	C6ZS43 NBS-LRR type disease resistance protein n=1 Tax=Glycine max RepID=C6ZS43_SOYBN
								Glyma04g35560	Gm04:41895924-41898943	3.42685	26.4861	2.95028	Q9FJJ3 Probable inactive poly [ADP-ribose] polymerase SRO5 n=1 Tax=Arabidopsis thaliana RepID=SRO5_ARATH
								Glyma02g42860	Gm02:47801559-47802395	73.7133	570.512	2.95226	G7K7B0 Polyadenylate-binding protein-interacting protein n=1 Tax=Medicago truncatula RepID=G7K7B0_MEDTR
								Glyma01g45020	Gm01:55451074-55452761	10.085	78.1781	2.95456	Q5NUF3 2-hydroxyisoflavanone dehydratase n=1 Tax=Glycine max RepID=Q5NUF3_SOYBN
								Glyma10g04640	Gm10:3564274-3567058	3.99333	30.9669	2.95506	B9GRC8 Glycosyltransferase, CAZy family GT47 n=1 Tax=Populus trichocarpa RepID=B9GRC8_POPTR
								Glyma11g36940	Gm11:38220972-38222747	9.16804	71.4392	2.96203	Q9FZK5 F17L21.9 n=1 Tax=Arabidopsis thaliana RepID=Q9FZK5_ARATH
								Glyma11g12060	Gm11:8607737-8609255	2.93893	22.9088	2.96254	G7J7R4 Salt tolerance protein n=1 Tax=Medicago truncatula RepID=G7J7R4_MEDTR
								Glyma14g35395	Gm14:44344994-44347220	0.382755	2.98357	2.96255	G7KAG2 2-aminoethanethiol dioxygenase n=1 Tax=Medicago truncatula RepID=G7KAG2_MEDTR
								Glyma16g15166	Gm16:16278764-16280527	1.35476	10.5661	2.96333	B6TMS6 4F5 protein family protein n=1 Tax=Zea mays RepID=B6TMS6_MAIZE
								Glyma08g18880	Gm08:14264877-14265654	4.20621	32.8309	2.96446	NA
								Glyma18g51680	Gm18:60498748-60502923	1.53139	11.9964	2.96969	G7KSW4 Ethylene-responsive transcription factor n=1 Tax=Medicago truncatula RepID=G7KSW4_MEDTR
								Glyma13g18960	Gm13:22555856-22565102	7.28524	57.1734	2.9723	E3Q0A8 Multidrug resistance-associated protein 2 (Fragment) n=1 Tax=Phaseolus vulgaris RepID=E3Q0A8_PHAVU
								Glyma06g13760	Gm06:10886494-10890619	80.1032	628.976	2.97307	G7J858 Major facilitator superfamily domain-containing protein n=1 Tax=Medicago truncatula RepID=G7J858_MEDTR
								Glyma13g27680	Gm13:30838056-30841258	30.9126	242.961	2.97446	B9RXP8 Glucose-6-phosphate/phosphate translocator 2, chloroplast, putative n=1 Tax=Ricinus communis RepID=B9RXP8_RICCO
								Glyma14g37480	Gm14:46760251-46762659	4.21368	33.1884	2.97753	G7JZL5 Protein phosphatase 2C n=1 Tax=Medicago truncatula RepID=G7JZL5_MEDTR
								Glyma13g20920	Gm13:24424995-24428223	0.510283	4.02011	2.97786	B9S0D9 Carbonic anhydrase, putative n=1 Tax=Ricinus communis RepID=B9S0D9_RICCO
								Glyma02g41490	Gm02:46602001-46607380	4.41868	34.8993	2.98151	G7KBQ8 Serine/threonine protein kinase n=2 Tax=Medicago truncatula RepID=G7KBQ8_MEDTR
								Glyma06g14010	Gm06:11062558-11063864	0.295295	2.33726	2.98459	Q9LZC0 Emb|CAB85509.1 n=1 Tax=Arabidopsis thaliana RepID=Q9LZC0_ARATH
								Glyma05g37350	Gm05:40963384-40965044	1.3847	10.9755	2.98664	B9S1V7 GTP binding protein, putative n=1 Tax=Ricinus communis RepID=B9S1V7_RICCO
								Glyma06g12120	Gm06:9334100-9342049	9.40728	74.5685	2.98672	Q0GXX3 Auxin conjugate hydrolase n=1 Tax=Medicago truncatula RepID=Q0GXX3_MEDTR
								Glyma18g41340	Gm18:50177732-50179125	1.45643	11.5543	2.98792	P32110 Probable glutathione S-transferase n=2 Tax=Glycine max RepID=GSTX6_SOYBN
								Glyma13g24510	Gm13:27869586-27870386	0.839643	6.66602	2.98898	P05478 18.5 kDa class I heat shock protein n=2 Tax=Glycine max RepID=HSP16_SOYBN
								Glyma16g29040	Gm16:32955697-32963483	6.68555	53.1089	2.98984	B9RIQ4 ATP binding protein, putative n=1 Tax=Ricinus communis RepID=B9RIQ4_RICCO
								Glyma13g34920	Gm13:36417203-36418397	4.88629	38.829	2.99032	C6T283 Ethylene-responsive transcription factor 6 n=1 Tax=Glycine max RepID=C6T283_SOYBN
								Glyma12g32841	Gm12:36238944-36239747	1.44381	11.4748	2.99052	NA
								Glyma13g27840	Gm13:30965024-30966929	10.8409	86.3241	2.99328	B9RTU3 Basic 7S globulin 2 small subunit, putative n=1 Tax=Ricinus communis RepID=B9RTU3_RICCO
								Glyma10g28300	Gm10:37212931-37214315	6.89009	54.9505	2.99554	B9RFR7 Hydrophobic protein LTI6A, putative n=1 Tax=Ricinus communis RepID=B9RFR7_RICCO
								Glyma14g34901	Gm14:43613699-43619956	1.51952	12.1223	2.99598	G7KB79 Receptor-like kinase-like protein n=1 Tax=Medicago truncatula RepID=G7KB79_MEDTR
								Glyma19g02190	Gm19:1885354-1887694	2.415	19.3064	2.99898	G7IKW4 Mitochondrial chaperone BCS1 n=1 Tax=Medicago truncatula RepID=G7IKW4_MEDTR
								Glyma07g06950	Gm07:5606733-5610366	1.3147	10.5128	2.99933	G7KT22 3-methyl-2-oxobutanoate hydroxymethyltransferase n=1 Tax=Medicago truncatula RepID=G7KT22_MEDTR
								Glyma02g28845	Gm02:30052898-30058524	2.78605	22.2948	3.00042	Q9FG35 Emb|CAB82953.1 n=1 Tax=Arabidopsis thaliana RepID=Q9FG35_ARATH
								Glyma09g31740	Gm09:38382761-38383979	0.272642	2.18342	3.00151	Q39805 Dehydrin-like protein n=3 Tax=Glycine RepID=Q39805_SOYBN
								Glyma17g01150	Gm17:649928-653524	3.065	24.5782	3.00342	G7JLR5 Chitin-inducible gibberellin-responsive protein n=1 Tax=Medicago truncatula RepID=G7JLR5_MEDTR
								Glyma14g04300	Gm14:2885084-2886951	0.439206	3.52468	3.00452	Q9M396 Ankyrin repeat-containing protein n=1 Tax=Arabidopsis thaliana RepID=Q9M396_ARATH
								Glyma09g30250	Gm09:37111057-37112888	0.203131	1.63123	3.00548	G7KQC6 U-box domain-containing protein n=1 Tax=Medicago truncatula RepID=G7KQC6_MEDTR
								Glyma05g02600	Gm05:1983799-1986652	1.4709	11.8269	3.0073	B9RAV5 Ferric-chelate reductase, putative n=1 Tax=Ricinus communis RepID=B9RAV5_RICCO
								Glyma03g11610	Gm03:14224302-14227485	5.41352	43.5909	3.00939	G7JTE4 Aldose reductase n=1 Tax=Medicago truncatula RepID=G7JTE4_MEDTR
								Glyma12g36300	Gm12:39418337-39419741	2.87806	23.1866	3.01013	G8A244 Protein RUPTURED POLLEN GRAIN n=1 Tax=Medicago truncatula RepID=G8A244_MEDTR
								Glyma01g21900	Gm01:27377288-27379936	1.36608	11.0104	3.01075	G7JYB4 Two-component response regulator ARR14 n=1 Tax=Medicago truncatula RepID=G7JYB4_MEDTR
								Glyma13g37290	Gm13:38422873-38429121	0.0755517	0.608959	3.01081	G7JSU8 Callose synthase n=1 Tax=Medicago truncatula RepID=G7JSU8_MEDTR
								Glyma10g06020	Gm10:4757721-4758152	6.41501	51.7075	3.01085	NA
								Glyma12g35805	Gm12:38935719-38939933	0.786839	6.34246	3.0109	G7IJF2 Mitochondrial chaperone BCS1 n=1 Tax=Medicago truncatula RepID=G7IJF2_MEDTR
								Glyma04g42360	Gm04:48120870-48121804	0.439586	3.55007	3.01363	G7I8G4 Calmodulin-like protein n=1 Tax=Medicago truncatula RepID=G7I8G4_MEDTR
								Glyma04g10880	Gm04:9143774-9145472	8.83539	71.3711	3.01398	G7LH86 Phi-1 protein n=1 Tax=Medicago truncatula RepID=G7LH86_MEDTR
								Glyma20g01180	Gm20:814593-820850	42.4456	342.87	3.01398	Q6TXD0 3-ketoacyl-CoA thiolase n=1 Tax=Glycine max RepID=Q6TXD0_SOYBN
								Glyma05g28280	Gm05:34135624-34136308	0.653772	5.28826	3.01593	Q6AVT8 Expressed protein n=2 Tax=Oryza sativa RepID=Q6AVT8_ORYSJ
								Glyma13g29350	Gm13:32263413-32266881	2.18706	17.7003	3.01671	NA
								Glyma02g46330	Gm02:50317320-50320111	6.94662	56.2744	3.0181	E7CQZ9 GLU n=1 Tax=Gossypium hirsutum RepID=E7CQZ9_GOSHI
								Glyma18g43540	Gm18:53090645-53095460	3.4916	28.2994	3.01881	G7KSC5 Ammonium transporter 3 member n=2 Tax=Medicago truncatula RepID=G7KSC5_MEDTR
								Glyma05g05230	Gm05:4548192-4550162	0.752961	6.11052	3.02065	B9T280 Triacylglycerol lipase, putative n=1 Tax=Ricinus communis RepID=B9T280_RICCO
								Glyma08g19180	Gm08:14476946-14479260	0.756202	6.14491	3.02255	G7INU9 Peroxidase n=1 Tax=Medicago truncatula RepID=G7INU9_MEDTR
								Glyma09g38600	Gm09:43930997-43934032	3.89815	31.7111	3.02413	B9RM86 Tyrosine-protein phosphatase SIW14, putative n=1 Tax=Ricinus communis RepID=B9RM86_RICCO
								Glyma01g05160	Gm01:4822853-4826845	7.10256	57.842	3.02571	Q2HTW4 Protein kinase n=1 Tax=Medicago truncatula RepID=Q2HTW4_MEDTR
								Glyma08g18891	Gm08:14269129-14270134	9.97294	81.3572	3.02818	NA
								Glyma09g41560	Gm09:46228128-46230331	4.91966	40.1692	3.02946	Q9ZQR8 Protein LURP1 n=1 Tax=Arabidopsis thaliana RepID=LURP1_ARATH
								Glyma12g30000	Gm12:33517582-33518869	1.6593	13.5544	3.03011	G8A166 Wall-associated receptor kinase n=1 Tax=Medicago truncatula RepID=G8A166_MEDTR
								Glyma07g31071	Gm07:36005456-36006167	8.50358	69.5352	3.0316	G7J9J7 F-box/LRR-repeat protein n=2 Tax=Medicago truncatula RepID=G7J9J7_MEDTR
								Glyma20g38000	Gm20:45727433-45734319	0.16441	1.34497	3.0322	G7I8P3 Respiratory burst oxidase-like protein n=1 Tax=Medicago truncatula RepID=G7I8P3_MEDTR
								Glyma11g03910	Gm11:2621247-2622901	0.438648	3.59727	3.03577	B3IX32 Transcription factor AP2-EREBP n=1 Tax=Lotus japonicus RepID=B3IX32_LOTJA
								Glyma15g09820	Gm15:7047841-7052699	67.648	555.451	3.03754	G7IP43 Early-responsive to dehydration n=1 Tax=Medicago truncatula RepID=G7IP43_MEDTR
								Glyma02g41300	Gm02:46466665-46468249	1.95792	16.0819	3.03805	G7K1X5 Polcalcin Nic t n=1 Tax=Medicago truncatula RepID=G7K1X5_MEDTR
								Glyma08g14370	Gm08:10445252-10453301	1.77904	14.6465	3.04138	E5D5L1 Calmodulin-binding protein n=1 Tax=Solanum lycopersicum RepID=E5D5L1_SOLLC
								Glyma13g34520	Gm13:36063658-36065671	17.7792	146.766	3.04525	I0B675 Epidermis-specific secreted glycoprotein EP1-like protein n=1 Tax=Gossypium hirsutum RepID=I0B675_GOSHI
								Glyma14g04580	Gm14:3147968-3150500	4.06579	33.5662	3.0454	G7K2X8 Avr9/Cf-9 rapidly elicited protein n=1 Tax=Medicago truncatula RepID=G7K2X8_MEDTR
								Glyma08g02580	Gm08:1759379-1761625	2.95465	24.4074	3.04626	A7LHG5 WRKY20 (Fragment) n=1 Tax=Glycine max RepID=A7LHG5_SOYBN
								Glyma20g32220	Gm20:40833387-40839998	5.92323	48.9749	3.04759	B6T6Y3 Cysteine-type peptidase n=1 Tax=Zea mays RepID=B6T6Y3_MAIZE
								Glyma06g11990	Gm06:9248366-9251620	0.958808	7.93751	3.04937	G7JDE9 Aspartic proteinase Asp1 n=1 Tax=Medicago truncatula RepID=G7JDE9_MEDTR
								Glyma16g01220	Gm16:894939-898051	25.2107	208.908	3.05076	G4XSW2 JAZ2 n=1 Tax=Vitis rupestris RepID=G4XSW2_9ROSI
								Glyma07g33870	Gm07:38809016-38813856	21.3413	177.069	3.05259	O23193 CBS domain-containing protein CBSX1, chloroplastic n=1 Tax=Arabidopsis thaliana RepID=CBSX1_ARATH
								Glyma10g07773	Gm10:6557298-6561512	1.16404	9.66184	3.05315	NA
								Glyma13g01910	Gm13:1662398-1665396	1.21348	10.0738	3.05338	G7KAB1 Trehalose-6-phosphate phosphatase n=2 Tax=Medicago truncatula RepID=G7KAB1_MEDTR
								Glyma11g05190	Gm11:3592330-3606344	5.85028	48.6678	3.05639	Q9FVE8 Plasma membrane Ca2+-ATPase n=1 Tax=Glycine max RepID=Q9FVE8_SOYBN
								Glyma03g36080	Gm03:43096020-43098548	24.5556	204.563	3.05842	B9SDI5 Protein binding protein, putative n=1 Tax=Ricinus communis RepID=B9SDI5_RICCO
								Glyma12g30920	Gm12:34526009-34527295	23.1437	192.871	3.05894	G7ITQ3 AN1-type zinc finger protein n=1 Tax=Medicago truncatula RepID=G7ITQ3_MEDTR
								Glyma11g00580	Gm11:251848-254871	2.4286	20.2953	3.06295	G7K113 Tryptophan synthase beta chain n=1 Tax=Medicago truncatula RepID=G7K113_MEDTR
								Glyma02g12810	Gm02:11064455-11064761	3.99254	33.4102	3.06491	E9L565 CLE19 protein n=2 Tax=Glycine max RepID=E9L565_SOYBN
								Glyma14g02090	Gm14:1244560-1250936	10.2234	85.6108	3.06591	G7K4B3 Fimbrin-1 n=1 Tax=Medicago truncatula RepID=G7K4B3_MEDTR
								Glyma07g30250	Gm07:35280566-35282986	0.202307	1.69576	3.06732	G7JU30 Lectin receptor-like kinase Tg-20 n=1 Tax=Medicago truncatula RepID=G7JU30_MEDTR
								Glyma18g18931	Gm18:20444941-20447244	3.79861	31.8427	3.06742	A2TEI4 Xyloglucan endotransglycosylase/hydrolase XTH-38 n=1 Tax=Populus tremula x Populus tremuloides RepID=A2TEI4_9ROSI
								Glyma05g32240	Gm05:37179013-37179709	0.625141	5.24527	3.06876	G7LD48 RING-H2 finger protein ATL1L n=2 Tax=Medicago truncatula RepID=G7LD48_MEDTR
								Glyma06g45540	Gm06:48276700-48278283	1.60104	13.4365	3.06908	Q0PJC4 MYB transcription factor MYB117 (Fragment) n=1 Tax=Glycine max RepID=Q0PJC4_SOYBN
								Glyma06g14820	Gm06:11615464-11617470	36.1322	303.896	3.07222	G3LT02 Chalcone isomerase n=1 Tax=Arachis hypogaea RepID=G3LT02_ARAHY
								Glyma03g39170	Gm03:45354637-45358985	1.612	13.6026	3.07696	Q9FKL6 Calmodulin-binding protein n=1 Tax=Arabidopsis thaliana RepID=Q9FKL6_ARATH
								Glyma17g07910	Gm17:5840907-5845018	1.32447	11.1861	3.07821	NA
								Glyma11g06980	Gm11:4919748-4921857	0.484024	4.09922	3.0822	G7LEV2 GRAS family transcription factor n=1 Tax=Medicago truncatula RepID=G7LEV2_MEDTR
								Glyma17g20030	Gm17:18555047-18556255	0.285803	2.42101	3.08252	NA
								Glyma10g32260	Gm10:40721377-40724308	11.5475	97.9603	3.08461	I1NIB0 3-ketoacyl-CoA synthase n=1 Tax=Glycine max RepID=I1NIB0_SOYBN
								Glyma01g40531	Gm01:52248256-52250234	0.138548	1.17642	3.08595	UPI00016C38A2 hypothetical protein GobsU_23777 n=1 Tax=Gemmata obscuriglobus UQM 2246 RepID=UPI00016C38A2
								Glyma16g25115	Gm16:29053630-29054074	3.17597	27.1017	3.09311	NA
								Glyma05g04630	Gm05:3812791-3820982	0.937218	8.00002	3.09355	G7JIW7 Glycogenin-2 n=1 Tax=Medicago truncatula RepID=G7JIW7_MEDTR
								Glyma11g13220	Gm11:9411945-9415396	0.704267	6.01784	3.09505	G7JEX9 B3 domain-containing protein n=1 Tax=Medicago truncatula RepID=G7JEX9_MEDTR
								Glyma07g15070	Gm07:14914743-14916192	5.61777	48.0289	3.09583	Q9LVB9 Emb|CAB83157.1 n=1 Tax=Arabidopsis thaliana RepID=Q9LVB9_ARATH
								Glyma08g14590	Gm08:10608071-10611058	13.6862	117.072	3.0966	B9T4H6 Trehalose-6-phosphate synthase, putative n=1 Tax=Ricinus communis RepID=B9T4H6_RICCO
								Glyma17g18230	Gm17:15455838-15457105	0.437529	3.74745	3.09846	B9IHA0 ABC transporter family protein n=1 Tax=Populus trichocarpa RepID=B9IHA0_POPTR
								Glyma07g03280	Gm07:2318350-2323578	1.01389	8.68584	3.09877	Q287V4 HAT-like transposase n=1 Tax=Capsella rubella RepID=Q287V4_9BRAS
								Glyma17g11530	Gm17:8669161-8670363	0.328441	2.82099	3.10249	Q8H6R4 Jp18 n=1 Tax=Citrus trifoliata RepID=Q8H6R4_PONTR
								Glyma05g21680	Gm05:26473855-26476824	0.503411	4.32939	3.10435	Q05680 Auxin-responsive GH3 product n=1 Tax=Glycine max RepID=Q05680_SOYBN
								Glyma06g22820	Gm06:19708864-19710648	0.628901	5.4123	3.10534	G7IT14 Anthocyanidin 3-O-glucosyltransferase n=1 Tax=Medicago truncatula RepID=G7IT14_MEDTR
								Glyma01g41520	Gm01:52991944-52993448	1.10729	9.53758	3.10659	G8EVZ8 Ethylene response factor 11 n=1 Tax=Medicago sativa RepID=G8EVZ8_MEDSA
								Glyma05g08240	Gm05:8209650-8210628	5.30464	45.7605	3.10878	Q9LW16 AT3g15630/MSJ11_3 n=1 Tax=Arabidopsis thaliana RepID=Q9LW16_ARATH
								Glyma08g21130	Gm08:16029791-16032183	0.519301	4.48168	3.1094	B9RQ81 DNA binding protein, putative n=1 Tax=Ricinus communis RepID=B9RQ81_RICCO
								Glyma10g02410	Gm10:1677301-1692940	13.7153	118.449	3.11041	G7IF88 Katanin p60 ATPase-containing subunit A-like protein n=1 Tax=Medicago truncatula RepID=G7IF88_MEDTR
								Glyma09g40300	Gm09:45246580-45247891	0.650333	5.61655	3.11043	B9RDG0 Copper ion binding protein, putative n=1 Tax=Ricinus communis RepID=B9RDG0_RICCO
								Glyma01g25830	Gm01:33967102-33969353	7.94602	68.6818	3.11162	C8CPQ3 Glyoxal oxidase n=1 Tax=Vitis vinifera RepID=C8CPQ3_VITVI
								Glyma17g23740	Gm17:23912235-23914953	5.43533	47.0006	3.11224	B9RH27 Transcription factor, putative n=1 Tax=Ricinus communis RepID=B9RH27_RICCO
								Glyma10g09980	Gm10:9392127-9393616	0.461595	3.99773	3.11448	Q259M7 H0723C07.4 protein n=1 Tax=Oryza sativa RepID=Q259M7_ORYSA
								Glyma17g14400	Gm17:11147789-11149384	0.440682	3.82755	3.11861	G7JEM0 NAD(P)H-quinone oxidoreductase subunit 6 n=1 Tax=Medicago truncatula RepID=G7JEM0_MEDTR
								Glyma07g09600	Gm07:8024432-8025152	7.82752	68.1484	3.12205	G7KNJ1 Arabinogalactan peptide n=1 Tax=Medicago truncatula RepID=G7KNJ1_MEDTR
								Glyma05g03070	Gm05:2336114-2343452	2.26966	19.7932	3.12446	B9RAK3 Bromodomain-containing protein, putative n=1 Tax=Ricinus communis RepID=B9RAK3_RICCO
								Glyma04g04760	Gm04:3531779-3533572	3.14229	27.4427	3.12653	I0AW24 C2H2 zinc-finger protein (Fragment) n=1 Tax=Glycine max RepID=I0AW24_SOYBN
								Glyma07g01611	Gm07:1051816-1054122	0.622266	5.43553	3.12682	B9RQ81 DNA binding protein, putative n=1 Tax=Ricinus communis RepID=B9RQ81_RICCO
								Glyma02g04620	Gm02:3778612-3780304	4.14699	36.3097	3.13022	G7JXQ1 Mitochondrial 2-oxoglutarate/malate carrier protein n=1 Tax=Medicago truncatula RepID=G7JXQ1_MEDTR
								Glyma20g39220	Gm20:46615068-46619160	10.1151	88.7995	3.13404	B9SN18 DNA binding protein, putative n=1 Tax=Ricinus communis RepID=B9SN18_RICCO
								Glyma16g27148	Gm16:31154408-31156390	8.98361	78.8857	3.1344	Q39822 Pip1 protein n=1 Tax=Glycine max RepID=Q39822_SOYBN
								Glyma12g10370	Gm12:8280306-8281631	0.870535	7.66026	3.13742	G7JEQ9 MAP kinase kinase kinase SSK2 n=1 Tax=Medicago truncatula RepID=G7JEQ9_MEDTR
								Glyma13g23740	Gm13:27065890-27067660	0.469775	4.13423	3.13758	B9RV37 Lactoylglutathione lyase, putative n=1 Tax=Ricinus communis RepID=B9RV37_RICCO
								Glyma18g02120	Gm18:1265173-1267280	6.43659	56.6669	3.13814	NA
								Glyma06g46665	Gm06:49244725-49251384	0.662903	5.84216	3.13963	G7KKS2 NBS-containing resistance-like protein n=1 Tax=Medicago truncatula RepID=G7KKS2_MEDTR
								Glyma11g13270	Gm11:9437777-9439641	4.96704	43.7814	3.13986	B8Y647 Class IV chitinase n=1 Tax=Medicago sativa RepID=B8Y647_MEDSA
								Glyma06g24820	Gm06:22588710-22594497	9.89193	87.2328	3.14055	B6TL87 Choline/ethanolamine kinase n=1 Tax=Zea mays RepID=B6TL87_MAIZE
								Glyma19g31410	Gm19:39218312-39223904	2.26976	20.0504	3.14302	G7IDS5 Patatin-like phospholipase domain-containing protein n=1 Tax=Medicago truncatula RepID=G7IDS5_MEDTR
								Glyma18g43190	Gm18:52605759-52608369	0.383292	3.39338	3.14621	G7JN34 Zinc finger and SCAN domain-containing protein n=1 Tax=Medicago truncatula RepID=G7JN34_MEDTR
								Glyma07g36640	Gm07:41980062-41983090	0.400538	3.56387	3.15343	D9ZJG1 WRKY domain class transcription factor n=1 Tax=Malus x domestica RepID=D9ZJG1_MALDO
								Glyma16g02320	Gm16:1861069-1863055	1.8657	16.6043	3.15378	B9SVE6 DNA binding protein, putative n=1 Tax=Ricinus communis RepID=B9SVE6_RICCO
								Glyma05g01845	Gm05:1304913-1306580	18.2147	162.537	3.1576	B4UWC2 Gonadotropin beta chain n=1 Tax=Arachis hypogaea RepID=B4UWC2_ARAHY
								Glyma06g40330	Gm06:43456103-43457090	2.23637	19.9698	3.15859	B7FH70 Centrin-2 n=1 Tax=Medicago truncatula RepID=B7FH70_MEDTR
								Glyma03g36010	Gm03:43018648-43020002	0.789665	7.05836	3.16002	Q259M7 H0723C07.4 protein n=1 Tax=Oryza sativa RepID=Q259M7_ORYSA
								Glyma16g26965	Gm16:31051832-31052616	16.6046	148.443	3.16026	Q9LVC0 Arabinogalactan peptide 14 n=1 Tax=Arabidopsis thaliana RepID=AGP14_ARATH
								Glyma06g19820	Gm06:16161919-16168037	44.7813	400.944	3.16243	B0M1A6 Betaine aldehyde dehydrogenase n=1 Tax=Glycine max RepID=B0M1A6_SOYBN
								Glyma15g42680	Gm15:50113735-50116842	4.61676	41.3775	3.16389	G7IWI2 DNA binding protein n=1 Tax=Medicago truncatula RepID=G7IWI2_MEDTR
								Glyma10g01380	Gm10:1005708-1010005	0.217265	1.9529	3.16809	Q4W8C0 Gibberellin 2-oxidase n=1 Tax=Vigna angularis RepID=Q4W8C0_PHAAN
								Glyma18g51600	Gm18:60468085-60470084	51.0082	458.518	3.16818	F6KBT6 Allene oxide cyclase 6 n=1 Tax=Glycine max RepID=F6KBT6_SOYBN
								Glyma16g27136	Gm16:31144447-31148555	21.6116	194.278	3.16824	Q39822 Pip1 protein n=1 Tax=Glycine max RepID=Q39822_SOYBN
								Glyma03g42260	Gm03:47503470-47512218	17.1896	154.539	3.16837	C0SNP2 Late elongated hypocotyl and circadian clock associated-1-like protein 2 n=1 Tax=Glycine max RepID=C0SNP2_SOYBN
								Glyma12g12260	Gm12:10436715-10437860	1.09754	9.87163	3.16902	NA
								Glyma14g08110	Gm14:6138322-6140198	0.658654	5.95335	3.17611	I1KH69 Lipoxygenase n=1 Tax=Glycine max RepID=I1KH69_SOYBN
								Glyma13g01420	Gm13:1141407-1146402	1.9677	17.8401	3.18054	G7JEA0 Trehalose-6-phosphate synthase n=1 Tax=Medicago truncatula RepID=G7JEA0_MEDTR
								Glyma05g27550	Gm05:33473411-33477323	2.87502	26.1918	3.18747	B9T413 DNA binding protein, putative n=1 Tax=Ricinus communis RepID=B9T413_RICCO
								Glyma07g34500	Gm07:39480554-39483029	0.36509	3.3274	3.18807	B9S109 Glucan endo-1,3-beta-glucosidase, putative n=1 Tax=Ricinus communis RepID=B9S109_RICCO
								Glyma17g01750	Gm17:1078789-1080526	0.479761	4.38046	3.1907	Q9LPT5 F11F12.2 protein n=1 Tax=Arabidopsis thaliana RepID=Q9LPT5_ARATH
								Glyma17g06780	Gm17:4834455-4834968	1.01992	9.32589	3.19278	Q9AVP1 mRNA, 952 bp sequence n=1 Tax=Nicotiana tabacum RepID=Q9AVP1_TOBAC
								Glyma01g41260	Gm01:52822190-52826139	10.3901	95.0415	3.19334	I1E3I7 Membrane-associated/ABA-activated and calcium-independent protein kinase n=1 Tax=Glycine soja RepID=I1E3I7_GLYSO
								Glyma06g45370	Gm06:48114424-48115406	13.4265	123.589	3.2024	Q04129 Wound induced protein (Fragment) n=1 Tax=Solanum lycopersicum RepID=Q04129_SOLLC
								Glyma07g04480	Gm07:3269426-3276002	16.8412	155.206	3.20412	I1KHC6 Lipoxygenase n=1 Tax=Glycine max RepID=I1KHC6_SOYBN
								Glyma20g27460	Gm20:36629917-36633618	2.53775	23.4484	3.20787	Q9XED4 Receptor-like protein kinase homolog RK20-1 n=1 Tax=Phaseolus vulgaris RepID=Q9XED4_PHAVU
								Glyma01g00730	Gm01:425499-427881	8.45633	78.2732	3.21041	G7KJ71 Caffeoyl-CoA O-methyltransferase n=1 Tax=Medicago truncatula RepID=G7KJ71_MEDTR
								Glyma12g35550	Gm12:38675212-38676429	4.14065	38.3648	3.21186	C6T283 Ethylene-responsive transcription factor 6 n=1 Tax=Glycine max RepID=C6T283_SOYBN
								Glyma07g38465	Gm07:43198181-43199597	1.14598	10.6198	3.21211	Q7XZD0 Isoflavonoid glucosyltransferase n=1 Tax=Glycyrrhiza echinata RepID=Q7XZD0_GLYEC
								Glyma06g38410	Gm06:41306756-41309130	3.34724	31.0337	3.21279	Q52QR3 NAC domain protein NAC3 n=1 Tax=Glycine max RepID=Q52QR3_SOYBN
								Glyma03g41390	Gm03:46887906-46893673	16.4309	152.771	3.21689	Q9SP01 Indole-3-acetic acid induced protein ARG-2 homolog n=1 Tax=Glycine max RepID=Q9SP01_SOYBN
								Glyma05g27280	Gm05:33187986-33190762	0.612786	5.69953	3.21739	I3WTA4 Jasmonate ZIM domain protein f n=1 Tax=Nicotiana attenuata RepID=I3WTA4_NICAT
								Glyma18g51280	Gm18:60212523-60213285	0.599113	5.58437	3.2205	Q9SW07 Protein GLUTAMINE DUMPER 2 n=1 Tax=Arabidopsis thaliana RepID=GDU2_ARATH
								Glyma01g34380	Gm01:46754477-46758976	4.44048	41.4345	3.22205	Q84M78 Expressed protein n=1 Tax=Oryza sativa Japonica Group RepID=Q84M78_ORYSJ
								Glyma01g41200	Gm01:52782345-52785370	0.749087	6.9905	3.22219	C6ZRN4 NAK-type protein kinase n=1 Tax=Glycine max RepID=C6ZRN4_SOYBN
								Glyma13g42820	Gm13:42682405-42684307	5.03314	47.0412	3.22439	G8A2U0 Dof zinc finger protein n=1 Tax=Medicago truncatula RepID=G8A2U0_MEDTR
								Glyma18g20470	Gm18:22161619-22166309	0.716562	6.6978	3.22452	C6ZRU6 Protein kinase family protein n=1 Tax=Glycine max RepID=C6ZRU6_SOYBN
								Glyma17g12710	Gm17:9608058-9609192	4.04123	37.7876	3.22505	Q9LW16 AT3g15630/MSJ11_3 n=1 Tax=Arabidopsis thaliana RepID=Q9LW16_ARATH
								Glyma04g09710	Gm04:7980655-7982949	0.874611	8.17982	3.22536	B9RJW1 DNA binding protein, putative n=1 Tax=Ricinus communis RepID=B9RJW1_RICCO
								Glyma13g30990	Gm13:33463870-33465167	4.39704	41.1419	3.22601	B3VHW0 Ethylene-responsive element binding factor 4 n=1 Tax=Glycine max RepID=B3VHW0_SOYBN
								Glyma06g13040	Gm06:10171105-10173521	0.517476	4.8433	3.22643	G7J693 Ethylene responsive transcription factor 1a n=1 Tax=Medicago truncatula RepID=G7J693_MEDTR
								Glyma04g42660	Gm04:48348658-48356846	2.52217	23.6258	3.22763	Q0GXX3 Auxin conjugate hydrolase n=1 Tax=Medicago truncatula RepID=Q0GXX3_MEDTR
								Glyma08g16050	Gm08:11710694-11711825	3.27206	30.7005	3.22999	NA
								Glyma09g29000	Gm09:35955409-35959244	0.471725	4.42773	3.23055	G7KPN7 Receptor-like protein kinase n=1 Tax=Medicago truncatula RepID=G7KPN7_MEDTR
								Glyma07g10311	Gm07:8618641-8620644	1.1026	10.3879	3.23593	G7KN12 Transcription factor BEE n=1 Tax=Medicago truncatula RepID=G7KN12_MEDTR
								Glyma05g09920	Gm05:9808653-9813496	1.14025	10.7811	3.24108	G7IJL9 2-oxoglutarate-dependent dioxygenase n=1 Tax=Medicago truncatula RepID=G7IJL9_MEDTR
								Glyma02g11600	Gm02:9786960-9791765	15.8266	150.047	3.24499	O23193 CBS domain-containing protein CBSX1, chloroplastic n=1 Tax=Arabidopsis thaliana RepID=CBSX1_ARATH
								Glyma19g04900	Gm19:5125273-5129396	4.77635	45.3961	3.24859	G7KS01 Abhydrolase domain-containing protein FAM108C1 n=2 Tax=Medicago truncatula RepID=G7KS01_MEDTR
								Glyma02g16710	Gm02:15082147-15083984	0.935445	8.89936	3.24998	G7IEE7 Xyloglucan-specific endoglucanase inhibitor protein n=1 Tax=Medicago truncatula RepID=G7IEE7_MEDTR
								Glyma10g34760	Gm10:42934418-42936393	3.59424	34.3511	3.2566	Q45EZ4 RAV-like DNA-binding protein n=1 Tax=Glycine max RepID=Q45EZ4_SOYBN
								Glyma10g29280	Gm10:38162013-38169053	0.615954	5.90282	3.26051	G7I8P3 Respiratory burst oxidase-like protein n=1 Tax=Medicago truncatula RepID=G7I8P3_MEDTR
								Glyma15g02010	Gm15:1318655-1322131	8.33112	80.0252	3.26387	Q2HU48 TGF-beta receptor, type I/II extracellular region n=1 Tax=Medicago truncatula RepID=Q2HU48_MEDTR
								Glyma04g20330	Gm04:22293052-22296572	1.7621	16.9578	3.26658	B9SET7 Grr1, plant, putative n=1 Tax=Ricinus communis RepID=B9SET7_RICCO
								Glyma20g37290	Gm20:45180729-45185651	0.405701	3.90447	3.26664	I1NIU7 Cysteine synthase n=1 Tax=Glycine max RepID=I1NIU7_SOYBN
								Glyma11g30110	Gm11:31010916-31013840	2.29414	22.0925	3.26753	B9RVE0 CBL-interacting serine/threonine-protein kinase, putative n=1 Tax=Ricinus communis RepID=B9RVE0_RICCO
								Glyma01g39260	Gm01:51227462-51229777	1.88128	18.1199	3.26779	Q43457 Heat shock transcription factor 34 n=1 Tax=Glycine max RepID=Q43457_SOYBN
								Glyma09g39040	Gm09:44201234-44203532	1.6162	15.5867	3.26964	G7L6P2 WRKY transcription factor n=1 Tax=Medicago truncatula RepID=G7L6P2_MEDTR
								Glyma04g41740	Gm04:47599942-47601671	0.572568	5.52459	3.27035	G7J693 Ethylene responsive transcription factor 1a n=1 Tax=Medicago truncatula RepID=G7J693_MEDTR
								Glyma02g26490	Gm02:27368676-27370153	0.32108	3.10652	3.2743	NA
								Glyma02g40550	Gm02:45810185-45813224	7.91836	76.6762	3.2755	D2D327 Pyruvate decarboxylase n=1 Tax=Gossypium hirsutum RepID=D2D327_GOSHI
								Glyma11g37730	Gm11:38764701-38774525	4.9444	48.0065	3.27936	G7J353 Dual specificity protein phosphatase n=1 Tax=Medicago truncatula RepID=G7J353_MEDTR
								Glyma12g17710	Gm12:18002143-18003480	1.04873	10.1884	3.28021	NA
								Glyma02g11800	Gm02:10039227-10043279	5.52194	53.6584	3.28056	B6ZJZ9 Peroxisomal adenine nucleotide carrier 1 n=1 Tax=Glycine max RepID=B6ZJZ9_SOYBN
								Glyma11g10340	Gm11:7432907-7437544	12.3649	120.276	3.28203	B9T715 Calcium ion binding protein, putative n=1 Tax=Ricinus communis RepID=B9T715_RICCO
								Glyma01g37406	Gm01:49766181-49770448	9.81503	95.7014	3.28548	G7KGD5 Zinc finger CCCH domain-containing protein n=1 Tax=Medicago truncatula RepID=G7KGD5_MEDTR
								Glyma20g25080	Gm20:34793559-34794530	0.254757	2.48658	3.28697	NA
								Glyma17g34435	Gm17:38398164-38403505	2.99617	29.2627	3.28787	Q58G09 Chalcone-flavanone isomerase-like protein n=2 Tax=Arabidopsis thaliana RepID=Q58G09_ARATH
								Glyma14g39950	Gm14:49009680-49010421	1.60797	15.7303	3.29023	G7I8D2 Syringolide-induced protein 14-1-1 n=1 Tax=Medicago truncatula RepID=G7I8D2_MEDTR
								Glyma02g38210	Gm02:43518198-43528632	8.61897	84.3356	3.29055	G7K608 Phosphoglycerate mutase-like protein n=3 Tax=Medicago truncatula RepID=G7K608_MEDTR
								Glyma14g01960	Gm14:1145372-1148815	3.40752	33.3545	3.29109	G7K4E0 Scarecrow-like transcription factor PAT1 n=1 Tax=Medicago truncatula RepID=G7K4E0_MEDTR
								Glyma12g33165	Gm12:36517740-36543317	18.8422	184.514	3.2917	Q94KI8 Two pore calcium channel protein 1 n=2 Tax=Arabidopsis thaliana RepID=TPC1_ARATH
								Glyma04g27580	Gm04:31495638-31497249	6.82654	66.8645	3.29201	G7IW38 NADPH:quinone oxidoreductase n=1 Tax=Medicago truncatula RepID=G7IW38_MEDTR
								Glyma12g15850	Gm12:14832733-14843614	0.896832	8.78452	3.29205	G7JCP8 Tir-nbs-lrr resistance protein n=1 Tax=Medicago truncatula RepID=G7JCP8_MEDTR
								Glyma13g21690	Gm13:25252044-25255695	1.14028	11.1835	3.29392	B9T5N0 Calmodulin binding protein, putative n=1 Tax=Ricinus communis RepID=B9T5N0_RICCO
								Glyma15g09490	Gm15:6782138-6788365	16.3458	160.331	3.29406	B9S8G7 Protein kinase, putative n=1 Tax=Ricinus communis RepID=B9S8G7_RICCO
								Glyma15g42510	Gm15:49926218-49930943	2.25104	22.0863	3.29449	A5A2I8 Uroporphiryn-III C-methyltransferase n=1 Tax=Medicago truncatula RepID=A5A2I8_MEDTR
								Glyma05g36010	Gm05:39929252-39931163	3.17551	31.193	3.29616	G7KQI2 Leucine-rich repeat receptor protein kinase EXS n=1 Tax=Medicago truncatula RepID=G7KQI2_MEDTR
								Glyma06g24365	Gm06:21775384-21775931	6.69561	65.7868	3.29651	NA
								Glyma18g06130	Gm18:4728595-4730894	1.23463	12.1491	3.2987	B9RVE0 CBL-interacting serine/threonine-protein kinase, putative n=1 Tax=Ricinus communis RepID=B9RVE0_RICCO
								Glyma17g01400	Gm17:860535-866726	9.35236	92.1175	3.30007	G7KK36 Membrane protein, putative n=1 Tax=Medicago truncatula RepID=G7KK36_MEDTR
								Glyma09g03100	Gm09:2189038-2191152	2.91584	28.7272	3.30043	G7IMM5 Reticuline oxidase-like protein n=1 Tax=Medicago truncatula RepID=G7IMM5_MEDTR
								Glyma08g20980	Gm08:15937001-15945892	1.58721	15.6389	3.30057	C9WMM7 Starch branching enzyme interacting protein-1 n=1 Tax=Zea mays RepID=C9WMM7_MAIZE
								Glyma04g05720	Gm04:4366062-4366873	0.974646	9.60573	3.30094	B9RQT7 Heat-shock protein, putative n=1 Tax=Ricinus communis RepID=B9RQT7_RICCO
								Glyma06g05550	Gm06:3963334-3968619	9.33564	92.0799	3.30207	G7J7P6 Mitochondrial substrate carrier family protein B n=1 Tax=Medicago truncatula RepID=G7J7P6_MEDTR
								Glyma03g37160	Gm03:43873248-43876743	3.58103	35.3472	3.30315	G7LBZ0 Thiamin pyrophosphokinase n=1 Tax=Medicago truncatula RepID=G7LBZ0_MEDTR
								Glyma17g01490	Gm17:909919-913423	0.246655	2.43725	3.30468	A7LHG6 WRKY23 (Fragment) n=1 Tax=Glycine max RepID=A7LHG6_SOYBN
								Glyma05g37690	Gm05:41238010-41239387	3.86486	38.2016	3.30515	B9RCD7 Potassium channel tetramerization domain-containing protein, putative n=1 Tax=Ricinus communis RepID=B9RCD7_RICCO
								Glyma03g02720	Gm03:2524863-2528471	12.0853	119.649	3.30749	Q84M78 Expressed protein n=1 Tax=Oryza sativa Japonica Group RepID=Q84M78_ORYSJ
								Glyma15g05991	Gm15:4252222-4253986	0.317504	3.14626	3.30879	G7KM79 Cytokinin-O-glucosyltransferase n=1 Tax=Medicago truncatula RepID=G7KM79_MEDTR
								Glyma13g29270	Gm13:32188061-32193456	19.5164	193.414	3.30893	G7IP43 Early-responsive to dehydration n=1 Tax=Medicago truncatula RepID=G7IP43_MEDTR
								Glyma07g30700	Gm07:35638758-35642365	1.23002	12.2069	3.31094	E5GAH3 (3S)-linalool/(E)-nerolidol synthase n=1 Tax=Vitis vinifera RepID=E5GAH3_VITVI
								Glyma12g31070	Gm12:34685038-34687825	2.70606	26.9003	3.31336	G7ITU0 Calpain-B n=2 Tax=Medicago truncatula RepID=G7ITU0_MEDTR
								Glyma13g23190	Gm13:26640140-26643792	3.46388	34.678	3.32356	G7JGL1 Heparanase-like protein n=1 Tax=Medicago truncatula RepID=G7JGL1_MEDTR
								Glyma14g34640	Gm14:43296943-43300652	1.17779	11.8144	3.32639	G7KAB8 Small glutamine-rich tetratricopeptide repeat-containing protein n=1 Tax=Medicago truncatula RepID=G7KAB8_MEDTR
								Glyma03g01210	Gm03:959249-968377	2.52032	25.3025	3.3276	B9RDR2 Acyl-CoA thioesterase, putative n=1 Tax=Ricinus communis RepID=B9RDR2_RICCO
								Glyma14g29040	Gm14:35642672-35643656	0.351124	3.53769	3.33276	G7J693 Ethylene responsive transcription factor 1a n=1 Tax=Medicago truncatula RepID=G7J693_MEDTR
								Glyma18g11030	Gm18:9856625-9862835	6.35578	64.1867	3.33613	O24431 Calmodulin-like domain protein kinase isoenzyme gamma n=1 Tax=Glycine max RepID=O24431_SOYBN
								Glyma11g06010	Gm11:4245482-4248072	0.825536	8.35024	3.33841	Q43457 Heat shock transcription factor 34 n=1 Tax=Glycine max RepID=Q43457_SOYBN
								Glyma02g37280	Gm02:42613358-42615164	1.26346	12.788	3.33934	Q9ARH3 Plastid-targeted protein 3 n=1 Tax=Craterostigma plantagineum RepID=Q9ARH3_CRAPL
								Glyma20g38590	Gm20:46139226-46141218	0.526899	5.35921	3.34642	G7IF04 Peroxidase n=1 Tax=Medicago truncatula RepID=G7IF04_MEDTR
								Glyma08g10530	Gm08:7650109-7654136	3.4966	35.5877	3.34736	B9T413 DNA binding protein, putative n=1 Tax=Ricinus communis RepID=B9T413_RICCO
								Glyma05g37390	Gm05:40997090-40999588	0.157195	1.60451	3.35151	B9RCH8 WRKY transcription factor, putative n=1 Tax=Ricinus communis RepID=B9RCH8_RICCO
								Glyma11g32754	Gm11:34598370-34603597	0.414721	4.23556	3.35234	G7J7W0 Intracellular protease n=1 Tax=Medicago truncatula RepID=G7J7W0_MEDTR
								Glyma12g32390	Gm12:35886786-35889516	12.7098	130.423	3.35918	G7IRJ7 Xyloglucan endotransglucosylase/hydrolase n=2 Tax=Medicago truncatula RepID=G7IRJ7_MEDTR
								Glyma11g35780	Gm11:37382888-37384064	4.0962	42.1049	3.36163	D7LYD7 Metal ion binding protein n=1 Tax=Arabidopsis lyrata subsp. lyrata RepID=D7LYD7_ARALL
								Glyma12g29630	Gm12:33070035-33072578	11.5414	118.719	3.36265	B9SWC2 Ubiquitin-protein ligase, putative n=1 Tax=Ricinus communis RepID=B9SWC2_RICCO
								Glyma13g28450	Gm13:31467399-31472391	0.839279	8.65103	3.36565	G7IFL9 Sugar transporter ERD6-like protein n=1 Tax=Medicago truncatula RepID=G7IFL9_MEDTR
								Glyma06g11970	Gm06:9231480-9233790	15.1976	156.734	3.3664	Q52QR4 NAC domain protein NAC2 n=1 Tax=Glycine max RepID=Q52QR4_SOYBN
								Glyma13g19910	Gm13:23403983-23410910	4.73351	48.8732	3.36806	Q0PJJ0 MYB transcription factor MYB118 n=1 Tax=Glycine max RepID=Q0PJJ0_SOYBN
								Glyma17g11340	Gm17:8517995-8519249	0.76266	7.88525	3.37005	C1K028 Stress induced protein n=1 Tax=Vitis vinifera RepID=C1K028_VITVI
								Glyma15g37255	Gm15:42935967-42940494	0.78481	8.11662	3.37046	G7LGT8 Resistance protein n=1 Tax=Medicago truncatula RepID=G7LGT8_MEDTR
								Glyma08g11610	Gm08:8462028-8464321	0.810823	8.4059	3.37394	B3F5J6 Chalcone synthase 9 n=1 Tax=Glycine max RepID=B3F5J6_SOYBN
								Glyma13g43730	Gm13:43335999-43337839	2.25778	23.4477	3.37647	G7II60 F-box/kelch-repeat protein n=1 Tax=Medicago truncatula RepID=G7II60_MEDTR
								Glyma04g05897	Gm04:4482764-4490655	0.374869	3.89462	3.37702	A7J2C0 Chloroplast copper-translocating HMA8 P-ATPase n=1 Tax=Glycine max RepID=A7J2C0_SOYBN
								Glyma17g18040	Gm17:15218292-15221030	0.279211	2.9077	3.38045	Q05680 Auxin-responsive GH3 product n=1 Tax=Glycine max RepID=Q05680_SOYBN
								Glyma17g07400	Gm17:5399856-5404285	5.15344	53.7226	3.38192	B9T619 1-deoxyxylulose-5-phosphate synthase, putative n=1 Tax=Ricinus communis RepID=B9T619_RICCO
								Glyma07g18670	Gm07:18699921-18704701	0.328633	3.42947	3.38344	G7KSC5 Ammonium transporter 3 member n=2 Tax=Medicago truncatula RepID=G7KSC5_MEDTR
								Glyma08g02560	Gm08:1756648-1758022	0.591074	6.1804	3.38629	Q94BT3 AT5g41810/K16L22_9 n=1 Tax=Arabidopsis thaliana RepID=Q94BT3_ARATH
								Glyma19g41730	Gm19:47926584-47930656	0.370581	3.87901	3.38783	Q0WVV6 Calmodulin-binding protein n=1 Tax=Arabidopsis thaliana RepID=Q0WVV6_ARATH
								Glyma09g26940	Gm09:33597235-33601343	0.700572	7.35217	3.39157	G7IAQ2 F-box family protein n=1 Tax=Medicago truncatula RepID=G7IAQ2_MEDTR
								Glyma17g35650	Gm17:39632653-39634764	10.3232	108.376	3.39209	Q84L89 L-asparaginase n=1 Tax=Glycine max RepID=Q84L89_SOYBN
								Glyma07g03950	Gm07:2797191-2799606	1.21896	12.8349	3.39635	Q9CAJ1 Hydroxyproline-rich glycoprotein family protein n=2 Tax=Arabidopsis thaliana RepID=Q9CAJ1_ARATH
								Glyma13g02860	Gm13:2812135-2813461	1.64236	17.3027	3.39715	C9WA61 AP2 domain-containing transcription factor 3 n=2 Tax=Glycine max RepID=C9WA61_SOYBN
								Glyma01g41070	Gm01:52622087-52623699	0.531593	5.60999	3.39961	H9DXV8 BAP1 n=1 Tax=Vitis vinifera RepID=H9DXV8_VITVI
								Glyma11g11350	Gm11:8080946-8085452	14.4968	153.315	3.40269	D7MDH3 Nodulin family protein n=1 Tax=Arabidopsis lyrata subsp. lyrata RepID=D7MDH3_ARALL
								Glyma02g02070	Gm02:1496907-1498733	2.78918	29.551	3.40529	P32292 Indole-3-acetic acid-induced protein ARG2 n=1 Tax=Vigna radiata var. radiata RepID=ARG2_VIGRR
								Glyma09g12100	Gm09:12545981-12547917	0.194384	2.06874	3.41177	E5GCC5 Serine-rich protein n=1 Tax=Cucumis melo subsp. melo RepID=E5GCC5_CUCME
								Glyma13g38020	Gm13:38946235-38947111	1.43827	15.3513	3.41595	Q9SR35 F3L24.15 protein n=1 Tax=Arabidopsis thaliana RepID=Q9SR35_ARATH
								Glyma06g45020	Gm06:47822465-47823551	1.44267	15.4066	3.41674	NA
								Glyma11g12990	Gm11:9278615-9279775	1.73884	18.5751	3.41717	NA
								Glyma17g01891	Gm17:1167951-1172585	2.36721	25.3658	3.42163	A4UTS2 Chloroplast glucose-6-phosphate/phosphate translocator n=1 Tax=Pisum sativum RepID=A4UTS2_PEA
								Glyma18g03066	Gm18:2021741-2023154	1.11765	11.9781	3.42187	G7JBB1 Serine/threonine protein kinase-like protein CCR4 n=1 Tax=Medicago truncatula RepID=G7JBB1_MEDTR
								Glyma03g01790	Gm03:1533033-1534003	0.275348	2.95557	3.42411	H9DXV8 BAP1 n=1 Tax=Vitis vinifera RepID=H9DXV8_VITVI
								Glyma17g01170	Gm17:673363-675721	1.28559	13.8222	3.42649	G7IP86 Auxin-induced in root cultures protein n=1 Tax=Medicago truncatula RepID=G7IP86_MEDTR
								Glyma17g10820	Gm17:8131083-8133244	3.67398	39.6201	3.43081	G7IZP9 R2R3-MYB transcription factor n=1 Tax=Medicago truncatula RepID=G7IZP9_MEDTR
								Glyma03g24020	Gm03:30681540-30684519	21.0791	228.188	3.43634	Q9SLN8 Allyl alcohol dehydrogenase n=1 Tax=Nicotiana tabacum RepID=Q9SLN8_TOBAC
								Glyma11g25860	Gm11:24606781-24611008	9.47356	102.819	3.44005	Q9LHH5 Emb|CAB77570.1 n=1 Tax=Arabidopsis thaliana RepID=Q9LHH5_ARATH
								Glyma02g14260	Gm02:12787990-12790043	1.67116	18.1579	3.44168	Q9FX50 T6J4.21 protein n=1 Tax=Arabidopsis thaliana RepID=Q9FX50_ARATH
								Glyma20g04820	Gm20:5205768-5208327	6.38107	69.3748	3.44254	G7KFA3 Ribonuclease T2 n=1 Tax=Medicago truncatula RepID=G7KFA3_MEDTR
								Glyma03g33340	Gm03:40943057-40946255	1.1697	12.7289	3.44389	Q9FQ95 In2-1 protein n=1 Tax=Glycine max RepID=Q9FQ95_SOYBN
								Glyma12g36703	Gm12:39759526-39760098	5.91628	64.4792	3.44607	NA
								Glyma14g12120	Gm14:10842089-10847299	8.18042	89.1693	3.4463	Q9FZL4 Probable monogalactosyldiacylglycerol synthase, chloroplastic n=1 Tax=Glycine max RepID=MGDG_SOYBN
								Glyma06g12960	Gm06:10108900-10109650	0.664977	7.25184	3.44697	G7J659 Protein MKS1 n=1 Tax=Medicago truncatula RepID=G7J659_MEDTR
								Glyma06g46361	Gm06:49001404-49001855	12.6428	137.984	3.44812	NA
								Glyma14g08560	Gm14:6548683-6551202	6.89649	75.2703	3.44815	A0MAV5 Allene oxide synthase n=1 Tax=Glycine max RepID=A0MAV5_SOYBN
								Glyma09g32730	Gm09:39231079-39232840	0.876426	9.57018	3.44884	D5L123 AP2 domain class transcription factor n=1 Tax=Malus x domestica RepID=D5L123_MALDO
								Glyma14g09760	Gm14:7817067-7818291	2.01895	22.0498	3.44909	I1M8T1 C2H2-type zinc finger protein n=1 Tax=Glycine max RepID=I1M8T1_SOYBN
								Glyma11g19170	Gm11:15852185-15856602	0.531175	5.82048	3.45388	G7IRD9 Fatty acyl-CoA reductase n=1 Tax=Medicago truncatula RepID=G7IRD9_MEDTR
								Glyma06g04840	Gm06:3425592-3427845	2.8534	31.3785	3.45902	I0AW24 C2H2 zinc-finger protein (Fragment) n=1 Tax=Glycine max RepID=I0AW24_SOYBN
								Glyma13g01070	Gm13:785421-786659	0.229571	2.52463	3.45906	NA
								Glyma12g08980	Gm12:6750911-6755225	7.4587	82.1278	3.46087	G7JM48 Lysine histidine transporter n=1 Tax=Medicago truncatula RepID=G7JM48_MEDTR
								Glyma10g01770	Gm10:1289269-1293478	2.07307	22.8497	3.46233	G7IDS8 Lipase n=1 Tax=Medicago truncatula RepID=G7IDS8_MEDTR
								Glyma09g25490	Gm09:31748069-31759189	1.12768	12.4295	3.46234	B9R9B3 KDEL motif-containing protein 1, putative n=1 Tax=Ricinus communis RepID=B9R9B3_RICCO
								Glyma15g02250	Gm15:1505477-1508682	1.52513	16.8205	3.46322	Q0PJL8 MYB transcription factor MYB52 n=1 Tax=Glycine max RepID=Q0PJL8_SOYBN
								Glyma14g22970	Gm14:27292237-27293813	0.705736	7.78755	3.46397	C9WA62 AP2 domain-containing transcription factor 4 n=1 Tax=Glycine max RepID=C9WA62_SOYBN
								Glyma08g03050	Gm08:2130283-2134214	0.207588	2.29261	3.4652	Q2MJ20 Cytochrome P450 monooxygenase CYP716A12 n=1 Tax=Medicago truncatula RepID=Q2MJ20_MEDTR
								Glyma13g40420	Gm13:40913245-40915457	0.539638	5.98147	3.47043	Q0GLE1 Dof11 n=1 Tax=Glycine max RepID=Q0GLE1_SOYBN
								Glyma11g34970	Gm11:36719682-36722379	0.212644	2.36902	3.47778	G7JB59 BAHD acyltransferase DCR n=1 Tax=Medicago truncatula RepID=G7JB59_MEDTR
								Glyma08g18900	Gm08:14273337-14279177	0.290184	3.23872	3.48039	G7IPL5 Riboflavin biosynthesis protein n=1 Tax=Medicago truncatula RepID=G7IPL5_MEDTR
								Glyma11g10320	Gm11:7416289-7421255	4.74229	53.0391	3.4834	B9SR02 Multicopper oxidase, putative n=1 Tax=Ricinus communis RepID=B9SR02_RICCO
								Glyma11g00230	Gm11:28471-30463	6.31548	70.798	3.48675	E9M5E6 Glycosyltransferase GT02J01 n=1 Tax=Pueraria montana var. lobata RepID=E9M5E6_PUEML
								Glyma03g28660	Gm03:36633987-36637947	2.1043	23.6355	3.48954	G7IDS5 Patatin-like phospholipase domain-containing protein n=1 Tax=Medicago truncatula RepID=G7IDS5_MEDTR
								Glyma01g38500	Gm01:50580026-50582631	2.09081	23.5687	3.49474	G7KAV9 Coiled-coil domain-containing protein 109A n=1 Tax=Medicago truncatula RepID=G7KAV9_MEDTR
								Glyma08g48040	Gm08:46769825-46771587	5.96118	67.3148	3.49725	G7KMR0 LOB domain-containing protein n=1 Tax=Medicago truncatula RepID=G7KMR0_MEDTR
								Glyma06g17950	Gm06:14288211-14288634	1.40223	15.8695	3.50046	G7J5J1 Calmodulin-like protein n=2 Tax=Medicago truncatula RepID=G7J5J1_MEDTR
								Glyma15g36645	Gm15:42042829-42043791	0.497348	5.62891	3.50053	NA
								Glyma10g01850	Gm10:1338717-1339684	1.10349	12.5237	3.50452	Q946U8 Long cell-linked locus protein n=2 Tax=Zea mays RepID=Q946U8_MAIZE
								Glyma10g42171	Gm10:49195206-49196548	1.8982	21.5743	3.50661	NA
								Glyma01g29670	Gm01:39988960-39991138	0.845678	9.61688	3.50739	Q9M035 ALC-interacting protein 1 n=1 Tax=Arabidopsis thaliana RepID=Q9M035_ARATH
								Glyma03g29470	Gm03:37498501-37503877	10.9174	124.46	3.51097	A2Q3K9 Guanylate kinase n=1 Tax=Medicago truncatula RepID=A2Q3K9_MEDTR
								Glyma03g16775	Gm03:21217897-21218760	0.585396	6.67729	3.51178	NA
								Glyma11g08190	Gm11:5799682-5800802	5.03249	57.4378	3.51266	P93499 DnaJ-like protein (Fragment) n=1 Tax=Phaseolus vulgaris RepID=P93499_PHAVU
								Glyma15g09560	Gm15:6853106-6856130	27.2071	311.543	3.51738	B9S8H3 Zinc finger protein, putative n=1 Tax=Ricinus communis RepID=B9S8H3_RICCO
								Glyma10g05560	Gm10:4346520-4352186	3.1752	36.394	3.51878	Q0PJJ0 MYB transcription factor MYB118 n=1 Tax=Glycine max RepID=Q0PJJ0_SOYBN
								Glyma13g37280	Gm13:38398795-38417631	16.3488	187.461	3.51933	Q94KI8 Two pore calcium channel protein 1 n=2 Tax=Arabidopsis thaliana RepID=TPC1_ARATH
								Glyma15g07080	Gm15:4930023-4936956	0.20182	2.31605	3.52052	G7IK53 Serine/threonine protein kinase n=1 Tax=Medicago truncatula RepID=G7IK53_MEDTR
								Glyma15g04570	Gm15:3185251-3186154	1.04149	11.9585	3.52132	Q4FH86 C2H2 transcription factor n=1 Tax=Glycine max RepID=Q4FH86_SOYBN
								Glyma10g09720	Gm10:9034095-9035270	0.466041	5.36789	3.52583	Q8S8Z8 Syringolide-induced protein B13-1-9 n=1 Tax=Glycine max RepID=Q8S8Z8_SOYBN
								Glyma13g29520	Gm13:32431723-32440305	3.49783	40.3106	3.52663	B9S8G7 Protein kinase, putative n=1 Tax=Ricinus communis RepID=B9S8G7_RICCO
								Glyma02g11630	Gm02:9815951-9818502	0.628141	7.25781	3.53037	Q8W3P8 Abscisate beta-glucosyltransferase n=1 Tax=Vigna angularis RepID=AOG_PHAAN
								Glyma06g13090	Gm06:10228529-10230877	0.714645	8.27223	3.53298	B3U399 WRKY transcription factor WRKY109669 n=1 Tax=Medicago truncatula RepID=B3U399_MEDTR
								Glyma19g32290	Gm19:40059496-40062459	8.5298	98.903	3.53543	A2Q3K9 Guanylate kinase n=1 Tax=Medicago truncatula RepID=A2Q3K9_MEDTR
								Glyma13g41220	Gm13:41585633-41591892	1.01701	11.8005	3.53644	G7JUT7 Scarecrow-like protein n=1 Tax=Medicago truncatula RepID=G7JUT7_MEDTR
								Glyma13g19670	Gm13:23154698-23157759	8.39297	97.4443	3.53732	B9T7P3 Pollen allergen Amb a 1.1, putative n=1 Tax=Ricinus communis RepID=B9T7P3_RICCO
								Glyma09g07520	Gm09:6413062-6436226	1.94319	22.6057	3.54018	G3E7M8 O-acyltransferase n=2 Tax=Glycine max RepID=G3E7M8_SOYBN
								Glyma05g33040	Gm05:37802235-37810226	1.44814	16.8606	3.54139	Q9XID5 F23M19.3 n=1 Tax=Arabidopsis thaliana RepID=Q9XID5_ARATH
								Glyma12g01580	Gm12:941451-942959	4.7407	55.3835	3.54628	Q39818 Heat shock 22 kDa protein, mitochondrial n=1 Tax=Glycine max RepID=HS22M_SOYBN
								Glyma16g04190	Gm16:3559705-3561111	111.829	1309.08	3.54919	A9XE62 KS-type dehydrin SLTI629 n=1 Tax=Glycine max RepID=A9XE62_SOYBN
								Glyma02g36460	Gm02:41942517-41948200	35.2188	414.389	3.55657	P48628 Omega-6 fatty acid desaturase, chloroplastic n=1 Tax=Glycine max RepID=FAD6C_SOYBN
								Glyma03g28490	Gm03:36416598-36418524	13.62	160.476	3.55856	A2Q2Z0 Methyltransferase, putative n=1 Tax=Medicago truncatula RepID=A2Q2Z0_MEDTR
								Glyma03g35930	Gm03:42985132-42986252	0.393789	4.64232	3.55935	Q8S8Z8 Syringolide-induced protein B13-1-9 n=1 Tax=Glycine max RepID=Q8S8Z8_SOYBN
								Glyma08g18340	Gm08:13778119-13779388	2.3686	27.9703	3.56179	Q9SKY1 Expressed protein n=1 Tax=Arabidopsis thaliana RepID=Q9SKY1_ARATH
								Glyma13g43870	Gm13:43440262-43448189	14.0717	166.485	3.56453	G7IMF4 Pleiotropic drug resistance protein n=1 Tax=Medicago truncatula RepID=G7IMF4_MEDTR
								Glyma01g35740	Gm01:48256233-48258418	0.921963	10.9449	3.56941	D4P3K4 Glycine and proline rich protein 4 n=1 Tax=Glycine max RepID=D4P3K4_SOYBN
								Glyma02g01780	Gm02:1291578-1292648	0.65535	7.79167	3.5716	B6SJT6 Long cell-linked locus protein n=1 Tax=Zea mays RepID=B6SJT6_MAIZE
								Glyma04g08800	Gm04:6918932-6925250	7.52737	89.6356	3.57385	G7ZWI6 Casein kinase I isoform delta-like protein n=1 Tax=Medicago truncatula RepID=G7ZWI6_MEDTR
								Glyma15g14121	Gm15:10644677-10649973	0.818533	9.7609	3.5759	G7IMM9 Wall-associated receptor kinase-like protein n=1 Tax=Medicago truncatula RepID=G7IMM9_MEDTR
								Glyma06g05420	Gm06:3857002-3861784	17.833	212.747	3.57652	G7IB94 Pollen-specific protein SF21 n=1 Tax=Medicago truncatula RepID=G7IB94_MEDTR
								Glyma17g15480	Gm17:12209107-12210493	2.21855	26.5329	3.58009	G8EVZ8 Ethylene response factor 11 n=1 Tax=Medicago sativa RepID=G8EVZ8_MEDSA
								Glyma02g46730	Gm02:50596701-50600181	5.49541	65.8588	3.58308	G7K4E0 Scarecrow-like transcription factor PAT1 n=1 Tax=Medicago truncatula RepID=G7K4E0_MEDTR
								Glyma07g16940	Gm07:16569597-16571022	0.646466	7.75433	3.58436	Q9FQF0 Glutathione S-transferase GST 8 n=1 Tax=Glycine max RepID=Q9FQF0_SOYBN
								Glyma04g40861	Gm04:46776682-46777501	1.91606	22.9977	3.58528	NA
								Glyma14g27990	Gm14:34322852-34325575	0.133694	1.61571	3.59516	A1YNA0 Acyl-[acyl-carrier-protein] desaturase n=2 Tax=Glycine max RepID=A1YNA0_SOYBN
								Glyma12g31300	Gm12:34876878-34878303	2.63017	31.9581	3.60295	B9SCZ3 Ccr4-associated factor, putative n=1 Tax=Ricinus communis RepID=B9SCZ3_RICCO
								Glyma19g29350	Gm19:36901144-36904557	1.51305	18.4766	3.61016	Q2HVC5 2-aminoethanethiol dioxygenase n=1 Tax=Medicago truncatula RepID=Q2HVC5_MEDTR
								Glyma05g09210	Gm05:8984513-8987590	0.448726	5.49902	3.61527	B9SPZ5 TRANSPARENT TESTA 12 protein, putative n=1 Tax=Ricinus communis RepID=B9SPZ5_RICCO
								Glyma13g08490	Gm13:8983496-8985302	0.209796	2.57126	3.61542	G7J693 Ethylene responsive transcription factor 1a n=1 Tax=Medicago truncatula RepID=G7J693_MEDTR
								Glyma08g47655	Gm08:46439324-46446765	0.12154	1.48973	3.61555	A2Q2S4 U box n=1 Tax=Medicago truncatula RepID=A2Q2S4_MEDTR
								Glyma13g30770	Gm13:33302260-33303185	6.31926	77.4784	3.61597	A2Q531 Glutaredoxin-C9 n=1 Tax=Medicago truncatula RepID=A2Q531_MEDTR
								Glyma10g04760	Gm10:3719578-3722014	0.244842	3.01768	3.62352	B9S595 Monooxygenase, putative n=1 Tax=Ricinus communis RepID=B9S595_RICCO
								Glyma03g29790	Gm03:37823730-37825847	0.214903	2.64912	3.62375	O81973 Cytochrome P450 93A3 n=1 Tax=Glycine max RepID=C93A3_SOYBN
								Glyma10g05210	Gm10:4022505-4023690	0.218284	2.69162	3.6242	G7L0M5 Zinc finger protein n=1 Tax=Medicago truncatula RepID=G7L0M5_MEDTR
								Glyma17g03950	Gm17:2603937-2607105	1.27311	15.7477	3.62871	B9RZT1 WRKY transcription factor, putative n=1 Tax=Ricinus communis RepID=B9RZT1_RICCO
								Glyma20g01200	Gm20:828064-830919	3.99388	49.4151	3.62909	B9HRV5 2-oxoglutarate-dependent dioxygenase n=1 Tax=Populus trichocarpa RepID=B9HRV5_POPTR
								Glyma10g42350	Gm10:49320630-49322821	0.216367	2.67864	3.62995	G7ZZA4 Nitrate and chloride transporter n=1 Tax=Medicago truncatula RepID=G7ZZA4_MEDTR
								Glyma05g33880	Gm05:38394535-38395588	9.54024	118.122	3.63011	Q93YA8 Calcium binding protein n=1 Tax=Sesbania rostrata RepID=Q93YA8_SESRO
								Glyma08g01430	Gm08:898773-900025	0.430922	5.34054	3.63149	A7LHG8 WRKY25 n=1 Tax=Glycine max RepID=A7LHG8_SOYBN
								Glyma03g37391	Gm03:44013722-44016484	0.159424	1.97662	3.6321	I1NB83 Pectinesterase n=1 Tax=Glycine max RepID=I1NB83_SOYBN
								Glyma18g03310	Gm18:2220678-2222783	2.57613	31.9772	3.63376	B5AE23 Nematode resistance HS1pro1 protein n=1 Tax=Glycine max RepID=B5AE23_SOYBN
								Glyma18g18250	Gm18:19671509-19672078	2.63868	32.8243	3.63688	NA
								Glyma04g17300	Gm04:18764548-18765661	0.528958	6.58041	3.63695	NA
								Glyma13g44730	Gm13:44119892-44122197	4.75214	59.4993	3.64622	Q2PJR9 WRKY27 n=1 Tax=Glycine max RepID=Q2PJR9_SOYBN
								Glyma12g34660	Gm12:37841668-37842672	12.008	150.357	3.64632	Q04129 Wound induced protein (Fragment) n=1 Tax=Solanum lycopersicum RepID=Q04129_SOLLC
								Glyma20g26770	Gm20:36117690-36120676	3.2685	41.0307	3.65	B9SNB4 Protein phosphatase 2c, putative n=1 Tax=Ricinus communis RepID=B9SNB4_RICCO
								Glyma02g01020	Gm02:764690-766752	0.834255	10.4812	3.65118	D8V5S2 Class II chitinase n=1 Tax=Arachis hypogaea RepID=D8V5S2_ARAHY
								Glyma14g24220	Gm14:28985134-28987338	3.02314	38.0042	3.65204	B2ZGR3 NAC domain protein n=1 Tax=Glycine max RepID=B2ZGR3_SOYBN
								Glyma13g07900	Gm13:8129885-8131649	12.6985	160.133	3.65654	E4MW96 mRNA, clone: RTFL01-07-O09 n=1 Tax=Eutrema halophilum RepID=E4MW96_THEHA
								Glyma20g27425	Gm20:36598729-36609307	0.101639	1.28311	3.65811	G8A0Y1 Cysteine-rich receptor-like protein kinase n=1 Tax=Medicago truncatula RepID=G8A0Y1_MEDTR
								Glyma18g42610	Gm18:51844733-51849575	0.27651	3.4927	3.65894	C6ZRZ7 Leucine-rich repeat family protein / protein kinase family protein n=1 Tax=Glycine max RepID=C6ZRZ7_SOYBN
								Glyma11g00430	Gm11:108700-110397	0.257358	3.25088	3.65898	NA
								Glyma03g37610	Gm03:44174431-44175538	0.356592	4.50673	3.65973	D9ZIT2 C2H2L domain class transcription factor n=1 Tax=Malus x domestica RepID=D9ZIT2_MALDO
								Glyma14g07990	Gm14:6040086-6042391	2.95256	37.3327	3.6604	B4YYB7 ST225 n=1 Tax=Eutrema halophilum RepID=B4YYB7_THEHA
								Glyma09g29360	Gm09:36262290-36263741	15.7168	199.46	3.66571	G7KKP1 Kunitz-type trypsin inhibitor alpha chain n=1 Tax=Medicago truncatula RepID=G7KKP1_MEDTR
								Glyma18g50860	Gm18:59869364-59871914	0.414034	5.25502	3.66587	C6ZRP3 Serine-threonine kinase n=1 Tax=Glycine max RepID=C6ZRP3_SOYBN
								Glyma19g05980	Gm19:6700248-6702894	25.6171	325.91	3.66929	F6KBT3 Allene oxide cyclase 3 n=1 Tax=Glycine max RepID=F6KBT3_SOYBN
								Glyma18g05160	Gm18:3895394-3897153	5.69943	72.7268	3.6736	Q9LVB9 Emb|CAB83157.1 n=1 Tax=Arabidopsis thaliana RepID=Q9LVB9_ARATH
								Glyma19g29300	Gm19:36865289-36869038	1.3472	17.2602	3.67941	Q2HVC5 2-aminoethanethiol dioxygenase n=1 Tax=Medicago truncatula RepID=Q2HVC5_MEDTR
								Glyma12g35411	Gm12:38536530-38537951	16.4772	212.089	3.68612	B9SQI2 Copper ion binding protein, putative n=1 Tax=Ricinus communis RepID=B9SQI2_RICCO
								Glyma0041s00290	scaffold_41:85372-94695	4.89937	63.085	3.68663	F4IBD7 Lipase/hydrolase n=2 Tax=Arabidopsis thaliana RepID=F4IBD7_ARATH
								Glyma03g25661	Gm03:32874071-32891505	0.300668	3.87836	3.68921	NA
								Glyma01g43540	Gm01:54536304-54540597	6.80108	87.7621	3.68976	G7K9B4 UDP-glucose 4-epimerase n=1 Tax=Medicago truncatula RepID=G7K9B4_MEDTR
								Glyma04g05350	Gm04:4075246-4079558	14.5318	187.647	3.69074	G7IB94 Pollen-specific protein SF21 n=1 Tax=Medicago truncatula RepID=G7IB94_MEDTR
								Glyma03g27250	Gm03:34875365-34876853	0.722958	9.34587	3.69235	B9RD53 GATA transcription factor, putative n=2 Tax=Malpighiales RepID=B9RD53_RICCO
								Glyma02g00820	Gm02:604826-607370	0.688412	8.91373	3.69468	Q9XIU9 GmMYB29A2 protein n=1 Tax=Glycine max RepID=Q9XIU9_SOYBN
								Glyma18g03870	Gm18:2666773-2673139	1.86101	24.1157	3.69581	G7J9Y3 RCC1 and BTB domain-containing protein n=2 Tax=Medicago truncatula RepID=G7J9Y3_MEDTR
								Glyma01g32130	Gm01:43553617-43555903	2.95906	38.3849	3.69733	B9S4A6 DNA binding protein, putative n=1 Tax=Ricinus communis RepID=B9S4A6_RICCO
								Glyma09g27180	Gm09:33966374-33967589	0.395548	5.15764	3.70479	Q5K6K2 CBF-like protein n=1 Tax=Glycine max RepID=Q5K6K2_SOYBN
								Glyma07g06480	Gm07:5225950-5227712	0.227859	2.98093	3.70955	Q39533 Serine acetyltransferase n=1 Tax=Citrullus lanatus RepID=Q39533_CITLA
								Glyma13g22890	Gm13:26380082-26383137	6.89093	90.4505	3.71436	G7JFC4 Seed imbibition protein n=1 Tax=Medicago truncatula RepID=G7JFC4_MEDTR
								Glyma20g24600	Gm20:34226397-34228682	1.97654	25.9638	3.71545	Q8S8Z9 Syringolide-induced protein 1-3-1B n=1 Tax=Glycine max RepID=Q8S8Z9_SOYBN
								Glyma13g22160	Gm13:25732122-25739079	2.32922	30.6487	3.71791	Q9LZC1 Emb|CAB85508.1 n=1 Tax=Arabidopsis thaliana RepID=Q9LZC1_ARATH
								Glyma13g02000	Gm13:1827350-1832253	4.2107	55.4349	3.71866	G7KA56 Glucan 1,3-beta-glucosidase n=1 Tax=Medicago truncatula RepID=G7KA56_MEDTR
								Glyma04g41701	Gm04:47554014-47556817	0.284009	3.7452	3.72103	B3U399 WRKY transcription factor WRKY109669 n=1 Tax=Medicago truncatula RepID=B3U399_MEDTR
								Glyma03g33070	Gm03:40754693-40755813	0.569989	7.54303	3.72614	G7L0M5 Zinc finger protein n=1 Tax=Medicago truncatula RepID=G7L0M5_MEDTR
								Glyma11g33450	Gm11:35274990-35276896	0.282178	3.73711	3.72725	Q8S8Z6 Syringolide-induced protein 13-1-1 n=1 Tax=Glycine max RepID=Q8S8Z6_SOYBN
								Glyma04g42800	Gm04:48457339-48460668	8.14585	108.626	3.73717	B2ZGQ4 NAC domain protein n=2 Tax=Glycine max RepID=B2ZGQ4_SOYBN
								Glyma14g39840	Gm14:48917944-48921504	23.4384	312.652	3.73761	B9R8J7 AMP dependent CoA ligase, putative n=1 Tax=Ricinus communis RepID=B9R8J7_RICCO
								Glyma07g16420	Gm07:16137794-16138560	1.3894	18.5834	3.74148	G7IMB8 Ubiquitin carboxyl-terminal hydrolase n=1 Tax=Medicago truncatula RepID=G7IMB8_MEDTR
								Glyma15g09980	Gm15:7211929-7214900	2.05783	27.6507	3.74812	G7LE60 Protein TIFY 5A n=1 Tax=Medicago truncatula RepID=G7LE60_MEDTR
								Glyma04g02380	Gm04:1656083-1658234	0.487856	6.58501	3.75466	B9R8E5 Alpha-expansin 11, putative n=1 Tax=Ricinus communis RepID=B9R8E5_RICCO
								Glyma17g11870	Gm17:8910931-8914903	2.96747	40.0571	3.75476	G7JFE4 Xylogalacturonan beta-1,3-xylosyltransferase n=1 Tax=Medicago truncatula RepID=G7JFE4_MEDTR
								Glyma09g03690	Gm09:2658881-2661422	0.660331	8.92375	3.75639	G7IL36 Myb-like transcription factor n=1 Tax=Medicago truncatula RepID=G7IL36_MEDTR
								Glyma20g22311	Gm20:32330952-32332259	42.3837	573.49	3.75818	B9RFR7 Hydrophobic protein LTI6A, putative n=1 Tax=Ricinus communis RepID=B9RFR7_RICCO
								Glyma19g34250	Gm19:41879581-41883835	2.21592	29.9848	3.75825	Q93YX6 Type IIB calcium ATPase n=1 Tax=Medicago truncatula RepID=Q93YX6_MEDTR
								Glyma02g06150	Gm02:4914059-4915180	0.345667	4.68529	3.76068	NA
								Glyma13g34720	Gm13:36254284-36259640	44.5007	604.68	3.76427	E5GBG6 Sodium/calcium exchanger family protein n=1 Tax=Cucumis melo subsp. melo RepID=E5GBG6_CUCME
								Glyma01g29760	Gm01:40077200-40079998	0.186337	2.54872	3.77378	G7JN34 Zinc finger and SCAN domain-containing protein n=1 Tax=Medicago truncatula RepID=G7JN34_MEDTR
								Glyma08g14810	Gm08:10791072-10792109	6.96355	95.2587	3.77396	Q4ABR4 80A08_3 n=1 Tax=Brassica rapa subsp. pekinensis RepID=Q4ABR4_BRARP
								Glyma15g14040	Gm15:10602777-10604820	9.26867	127.365	3.78046	G7IMM5 Reticuline oxidase-like protein n=1 Tax=Medicago truncatula RepID=G7IMM5_MEDTR
								Glyma08g21921	Gm08:16675021-16676935	0.654002	9.02616	3.78675	G7KB81 Receptor protein kinase-like protein n=2 Tax=Medicago truncatula RepID=G7KB81_MEDTR
								Glyma06g11700	Gm06:9000331-9002150	0.561908	7.75614	3.78693	C9WA63 AP2 domain-containing transcription factor 5 n=1 Tax=Glycine max RepID=C9WA63_SOYBN
								Glyma14g35330	Gm14:44224417-44225777	4.78953	66.1749	3.78833	O82161 Phi-1 protein n=1 Tax=Nicotiana tabacum RepID=O82161_TOBAC
								Glyma11g33090	Gm11:34847973-34854532	10.2398	141.489	3.78843	G7J7X8 Polyamine oxidase n=2 Tax=Medicago truncatula RepID=G7J7X8_MEDTR
								Glyma15g36671	Gm15:42059048-42064043	0.764635	10.5904	3.79184	NA
								Glyma13g07490	Gm13:7655398-7657991	17.3108	241.128	3.80006	F6KBT4 Allene oxide cyclase 4 n=1 Tax=Glycine max RepID=F6KBT4_SOYBN
								Glyma09g06830	Gm09:5647366-5648462	2.15906	30.0822	3.80044	NA
								Glyma13g21350	Gm13:24836157-24838470	1.43937	20.0595	3.80078	A7UQU9 Homeodomain-like n=1 Tax=Medicago truncatula RepID=A7UQU9_MEDTR
								Glyma05g07890	Gm05:7817879-7818821	0.294977	4.1332	3.80859	Q9LII3 AT3g18560/K24M9_5 n=1 Tax=Arabidopsis thaliana RepID=Q9LII3_ARATH
								Glyma13g22650	Gm13:26147947-26149999	7.6582	107.782	3.81497	G7JE55 Blue copper protein n=1 Tax=Medicago truncatula RepID=G7JE55_MEDTR
								Glyma07g10321	Gm07:8632572-8633965	0.688439	9.71012	3.81809	Q0PJK4 MYB transcription factor MYB84 n=1 Tax=Glycine max RepID=Q0PJK4_SOYBN
								Glyma18g49680	Gm18:59047073-59053467	0.948829	13.3895	3.81881	Q2HT55 SPX, N-terminal; EXS, C-terminal n=1 Tax=Medicago truncatula RepID=Q2HT55_MEDTR
								Glyma17g17330	Gm17:14149201-14150711	5.08266	71.7895	3.82012	Q8L8M2 Adhesive/proline-rich protein homolog n=1 Tax=Arabidopsis thaliana RepID=Q8L8M2_ARATH
								Glyma12g35200	Gm12:38348688-38350123	0.279846	3.9527	3.82013	B9R9T3 Axonemal dynein light chain, putative n=1 Tax=Ricinus communis RepID=B9R9T3_RICCO
								Glyma13g29380	Gm13:32281776-32287562	0.167214	2.36193	3.82021	G7ILW5 ABC transporter B family member n=1 Tax=Medicago truncatula RepID=G7ILW5_MEDTR
								Glyma11g35770	Gm11:37378729-37382769	0.124407	1.75858	3.82127	G7J2F3 Cation proton exchanger n=1 Tax=Medicago truncatula RepID=G7J2F3_MEDTR
								Glyma12g28870	Gm12:32238920-32242131	14.9303	211.192	3.82225	G7IN97 Metallothiol transferase fosB n=1 Tax=Medicago truncatula RepID=G7IN97_MEDTR
								Glyma12g01390	Gm12:826467-829447	0.877664	12.4329	3.82435	G7JVV7 Cytokinin oxidase n=1 Tax=Medicago truncatula RepID=G7JVV7_MEDTR
								Glyma02g43580	Gm02:48356242-48358098	0.327312	4.64936	3.82829	O04076 ACC-oxidase n=1 Tax=Vigna angularis RepID=O04076_PHAAN
								Glyma06g06530	Gm06:4658652-4660672	1.70778	24.3849	3.83579	G7J9V1 WRKY transcription factor n=1 Tax=Medicago truncatula RepID=G7J9V1_MEDTR
								Glyma13g22290	Gm13:25850543-25854952	0.0857805	1.22671	3.838	G7JHY0 GPI-anchored protein n=1 Tax=Medicago truncatula RepID=G7JHY0_MEDTR
								Glyma11g04130	Gm11:2751559-2753162	17.0495	244.45	3.84174	G7JYL9 Protein TIFY n=2 Tax=Medicago truncatula RepID=G7JYL9_MEDTR
								Glyma14g06710	Gm14:4919373-4920813	0.478593	6.88727	3.84706	G7KBY0 BAHD acyltransferase DCR n=1 Tax=Medicago truncatula RepID=G7KBY0_MEDTR
								Glyma15g10480	Gm15:7603410-7606365	10.916	157.276	3.84878	Q5F304 Beta-amylase n=1 Tax=Glycine max RepID=Q5F304_SOYBN
								Glyma13g07220	Gm13:7383168-7385575	0.964345	13.8975	3.84913	Q9FST0 Beta-glucan binding protein n=1 Tax=Glycine max RepID=Q9FST0_SOYBN
								Glyma17g03390	Gm17:2262616-2265357	2.45901	35.4849	3.85106	B9RZK6 Protein COBRA, putative n=1 Tax=Ricinus communis RepID=B9RZK6_RICCO
								Glyma13g17180	Gm13:20986183-20988819	17.9049	258.631	3.85247	G7IIQ4 Protein TIFY 10B n=1 Tax=Medicago truncatula RepID=G7IIQ4_MEDTR
								Glyma06g05580	Gm06:3993268-3996668	7.56246	109.253	3.85267	Q40465 Eukaryotic initiation factor 4A-11 n=1 Tax=Nicotiana tabacum RepID=IF411_TOBAC
								Glyma02g11060	Gm02:9218874-9220981	9.29328	134.406	3.85427	G7JY94 AP2 domain-containing transcription factor n=1 Tax=Medicago truncatula RepID=G7JY94_MEDTR
								Glyma15g01690	Gm15:1116832-1120395	3.20302	46.4365	3.85775	B9SQC1 Coatomer beta subunit, putative n=1 Tax=Ricinus communis RepID=B9SQC1_RICCO
								Glyma03g39610	Gm03:45618205-45625038	1.50538	21.8872	3.86188	H2E690 NADPH oxidase (Fragment) n=1 Tax=Phaseolus vulgaris RepID=H2E690_PHAVU
								Glyma13g37740	Gm13:38726180-38726915	0.975433	14.1845	3.86213	Q04129 Wound induced protein (Fragment) n=1 Tax=Solanum lycopersicum RepID=Q04129_SOLLC
								Glyma06g17451	Gm06:13802451-13808691	0.50242	7.31073	3.86305	Q949N7 AT3G26890 protein n=1 Tax=Arabidopsis thaliana RepID=Q949N7_ARATH
								Glyma12g12850	Gm12:11198492-11200511	0.303548	4.44056	3.87074	B9RVY6 Kinase, putative n=1 Tax=Ricinus communis RepID=B9RVY6_RICCO
								Glyma01g22880	Gm01:29149880-29152191	0.232253	3.40083	3.87212	P30080 Chalcone synthase 6 n=1 Tax=Glycine max RepID=CHS6_SOYBN
								Glyma17g08691	Gm17:6410460-6412369	0.275222	4.04569	3.87772	B9RLN0 RNA binding protein, putative n=1 Tax=Ricinus communis RepID=B9RLN0_RICCO
								Glyma03g38510	Gm03:44842029-44852737	2.57158	38.0697	3.88791	G7KVH5 Paladin n=1 Tax=Medicago truncatula RepID=G7KVH5_MEDTR
								Glyma11g03370	Gm11:2226198-2227946	0.660805	9.85524	3.89859	B9RD80 Zinc ion binding protein, putative n=1 Tax=Ricinus communis RepID=B9RD80_RICCO
								Glyma11g07370	Gm11:5169973-5172054	0.290611	4.33644	3.89935	Q8L5P5 LEA-like protein n=1 Tax=Lilium longiflorum RepID=Q8L5P5_LILLO
								Glyma04g08020	Gm04:6267529-6268381	1.91404	28.6437	3.90353	NA
								Glyma11g24410	Gm11:22138590-22143781	2.82667	42.3052	3.90366	D8V833 Calcium-dependent/calmodulin-binding receptor-like kinase n=1 Tax=Glycine soja RepID=D8V833_GLYSO
								Glyma12g11210	Gm12:9236578-9237706	0.98412	14.7624	3.90695	G7IRK4 Centrin-2 n=1 Tax=Medicago truncatula RepID=G7IRK4_MEDTR
								Glyma14g35380	Gm14:44313520-44317470	2.89546	43.4853	3.90866	G7KAG1 Serine-threonine protein kinase n=1 Tax=Medicago truncatula RepID=G7KAG1_MEDTR
								Glyma15g12690	Gm15:9388017-9390794	9.89307	149.895	3.92139	Q2HV28 C2 n=2 Tax=Medicago truncatula RepID=Q2HV28_MEDTR
								Glyma08g23590	Gm08:17976237-17979687	7.7006	116.833	3.92333	NA
								Glyma04g42760	Gm04:48432720-48435908	0.755937	11.5067	3.92807	G7JDE9 Aspartic proteinase Asp1 n=1 Tax=Medicago truncatula RepID=G7JDE9_MEDTR
								Glyma10g28610	Gm10:37488201-37490056	0.401898	6.13199	3.93145	Q7XZ08 Galactinol synthase n=1 Tax=Glycine max RepID=Q7XZ08_SOYBN
								Glyma14g27610	Gm14:33859147-33862494	0.236156	3.6052	3.93226	D7KK13 Nodulin MtN3 family protein n=1 Tax=Arabidopsis lyrata subsp. lyrata RepID=D7KK13_ARALL
								Glyma02g01300	Gm02:949934-951681	0.538641	8.22866	3.93326	Q0PJK7 MYB transcription factor MYB76 n=1 Tax=Glycine max RepID=Q0PJK7_SOYBN
								Glyma16g20490	Gm16:23098370-23101533	0.447779	6.87756	3.94104	G7L7U3 Abscisic acid 8'-hydroxylase n=1 Tax=Medicago truncatula RepID=G7L7U3_MEDTR
								Glyma04g17650	Gm04:19156861-19157948	0.386879	5.94774	3.94239	G7J5J1 Calmodulin-like protein n=2 Tax=Medicago truncatula RepID=G7J5J1_MEDTR
								Glyma02g37450	Gm02:42760921-42765648	3.67975	56.602	3.94317	G7KBG3 Hydrolase, putative n=1 Tax=Medicago truncatula RepID=G7KBG3_MEDTR
								Glyma06g19490	Gm06:15752646-15754996	1.41031	21.6964	3.94337	B9RB43 DNA binding protein, putative n=1 Tax=Ricinus communis RepID=B9RB43_RICCO
								Glyma10g29210	Gm10:38104006-38106230	10.3549	159.761	3.94753	B6UCX6 Hypoxia induced protein conserved region containing protein n=1 Tax=Zea mays RepID=B6UCX6_MAIZE
								Glyma10g44170	Gm10:50652846-50659109	0.226891	3.50157	3.94793	B9A1Q4 Glycinol 4-dimethylallyltransferase n=1 Tax=Glycine max RepID=G4DT_SOYBN
								Glyma04g13490	Gm04:13109642-13110739	48.0169	741.786	3.94939	G7IYJ3 21 kDa protein n=1 Tax=Medicago truncatula RepID=G7IYJ3_MEDTR
								Glyma18g43676	Gm18:53248907-53253400	0.839698	12.9839	3.95071	G7KT83 Abscisic acid receptor PYL4 n=1 Tax=Medicago truncatula RepID=G7KT83_MEDTR
								Glyma07g30950	Gm07:35924203-35925795	4.62668	71.8019	3.95597	B9H220 F-box family protein n=1 Tax=Populus trichocarpa RepID=B9H220_POPTR
								Glyma02g43910	Gm02:48591130-48598474	8.42937	130.834	3.95617	B0BLA8 CM0545.360.nc protein n=1 Tax=Lotus japonicus RepID=B0BLA8_LOTJA
								Glyma13g32630	Gm13:34737717-34741789	1.39075	21.6342	3.95938	G7IFB9 Receptor-like protein kinase HAIKU2 n=1 Tax=Medicago truncatula RepID=G7IFB9_MEDTR
								Glyma17g07850	Gm17:5807398-5808872	1.26286	19.6676	3.96105	B9SQW3 GMP synthase [glutamine-hydrolyzing] subunit A, putative n=1 Tax=Ricinus communis RepID=B9SQW3_RICCO
								Glyma18g03090	Gm18:2033237-2038137	2.08546	32.6381	3.96812	Q6TM10 Phospholipase C n=1 Tax=Vigna radiata RepID=Q6TM10_VIGRA
								Glyma06g45381	Gm06:48118748-48119601	6.31616	98.945	3.96951	Q04129 Wound induced protein (Fragment) n=1 Tax=Solanum lycopersicum RepID=Q04129_SOLLC
								Glyma06g47350	Gm06:49825817-49831648	0.053488	0.839432	3.97213	G7IV98 FolD bifunctional protein n=1 Tax=Medicago truncatula RepID=G7IV98_MEDTR
								Glyma01g38920	Gm01:50914354-50920765	3.10374	48.7315	3.97277	G7K9G5 Kinase-like protein n=1 Tax=Medicago truncatula RepID=G7K9G5_MEDTR
								Glyma20g33800	Gm20:42295185-42297489	1.84868	29.0349	3.97322	G7I303 Ethylene-responsive transcription factor n=1 Tax=Medicago truncatula RepID=G7I303_MEDTR
								Glyma03g31420	Gm03:39330973-39334739	3.03737	47.7719	3.97527	Q93YX6 Type IIB calcium ATPase n=1 Tax=Medicago truncatula RepID=Q93YX6_MEDTR
								Glyma18g14620	Gm18:14477240-14483374	16.7243	263.428	3.97739	B9S6G9 Amine oxidase, putative n=1 Tax=Ricinus communis RepID=B9S6G9_RICCO
								Glyma06g45240	Gm06:48043550-48044391	0.834323	13.144	3.97766	Q04129 Wound induced protein (Fragment) n=1 Tax=Solanum lycopersicum RepID=Q04129_SOLLC
								Glyma01g29190	Gm01:39285279-39288819	0.121748	1.91856	3.97805	Q84V95 Pyruvate decarboxylase 1 n=1 Tax=Lotus corniculatus RepID=Q84V95_LOTCO
								Glyma11g35760	Gm11:37369691-37372151	3.27259	51.6173	3.97935	G7J2E9 Arogenate dehydrogenase n=1 Tax=Medicago truncatula RepID=G7J2E9_MEDTR
								Glyma16g04150	Gm16:3533817-3537770	1.17536	18.5995	3.98409	Q2HVC5 2-aminoethanethiol dioxygenase n=1 Tax=Medicago truncatula RepID=Q2HVC5_MEDTR
								Glyma17g23730	Gm17:23902473-23908464	0.227895	3.60673	3.98425	Q71EW8 Methionine synthase n=2 Tax=Papilionoideae RepID=Q71EW8_SOYBN
								Glyma05g29400	Gm05:35038025-35039640	1.61495	25.5903	3.98603	I3NNW1 Tau class glutathione S-transferase n=1 Tax=Glycine soja RepID=I3NNW1_GLYSO
								Glyma03g07580	Gm03:8190904-8193162	0.610366	9.68204	3.98756	Q9M035 ALC-interacting protein 1 n=1 Tax=Arabidopsis thaliana RepID=Q9M035_ARATH
								Glyma13g01570	Gm13:1274684-1277469	4.1881	66.5304	3.98965	B9SQE1 Auxin-induced protein 5NG4, putative n=1 Tax=Ricinus communis RepID=B9SQE1_RICCO
								Glyma09g16656	Gm09:20036959-20037709	0.704435	11.1955	3.99031	D7KZN7 Aha1 domain-containing protein n=1 Tax=Arabidopsis lyrata subsp. lyrata RepID=D7KZN7_ARALL
								Glyma07g02420	Gm07:1656756-1660112	5.33321	84.9543	3.99361	NA
								Glyma12g01620	Gm12:971620-973125	0.426736	6.81537	3.99738	O24307 Topoisomerase I n=1 Tax=Pisum sativum RepID=O24307_PEA
								Glyma10g41260	Gm10:48383014-48384153	1.53874	24.5891	3.9982	B7FA06 cDNA, clone: J100026I16, full insert sequence n=2 Tax=Oryza sativa Japonica Group RepID=B7FA06_ORYSJ
								Glyma14g05060	Gm14:3504623-3509324	0.356876	5.71468	4.00118	D8KWQ3 Nod-factor receptor 1B n=1 Tax=Glycine max RepID=D8KWQ3_SOYBN
								Glyma06g46940	Gm06:49472276-49487430	3.14093	50.5038	4.00713	G7ZZF0 ABC transporter C family member n=1 Tax=Medicago truncatula RepID=G7ZZF0_MEDTR
								Glyma15g18070	Gm15:14507272-14535955	5.18029	83.5503	4.01154	G7IG90 Transcription factor bHLH n=1 Tax=Medicago truncatula RepID=G7IG90_MEDTR
								Glyma13g10000	Gm13:11572465-11574892	2.02715	32.9219	4.02152	B9S2V0 Kinase, putative n=1 Tax=Ricinus communis RepID=B9S2V0_RICCO
								Glyma10g42060	Gm10:49088525-49090451	2.02976	33.2776	4.03517	NA
								Glyma15g05060	Gm15:3621655-3624373	3.38619	55.8763	4.0445	G7IPG3 Kinase-like protein n=2 Tax=Medicago truncatula RepID=G7IPG3_MEDTR
								Glyma04g35380	Gm04:41727453-41729339	0.827469	13.6695	4.04611	B9RB43 DNA binding protein, putative n=1 Tax=Ricinus communis RepID=B9RB43_RICCO
								Glyma06g19810	Gm06:16156720-16157635	0.99195	16.4118	4.04833	Q9AUH7 UVI1 n=1 Tax=Pisum sativum RepID=Q9AUH7_PEA
								Glyma04g33320	Gm04:38893104-38895150	0.506423	8.38453	4.04932	B9RLX0 Thioredoxin II, putative n=1 Tax=Ricinus communis RepID=B9RLX0_RICCO
								Glyma05g35270	Gm05:39343169-39344234	0.654925	10.9139	4.05869	G7KNK3 Sigma factor sigB regulation protein rsbQ n=1 Tax=Medicago truncatula RepID=G7KNK3_MEDTR
								Glyma09g06770	Gm09:5528286-5537168	3.89079	65.6244	4.0761	G7IG90 Transcription factor bHLH n=1 Tax=Medicago truncatula RepID=G7IG90_MEDTR
								Glyma12g11340	Gm12:9453742-9455155	0.306772	5.18002	4.07772	Q0PJC4 MYB transcription factor MYB117 (Fragment) n=1 Tax=Glycine max RepID=Q0PJC4_SOYBN
								Glyma14g05050	Gm14:3496524-3501352	3.83983	64.9809	4.0809	B0BLB9 CM0545.430.nc protein n=1 Tax=Lotus japonicus RepID=B0BLB9_LOTJA
								Glyma07g39490	Gm07:43962746-43964252	0.386216	6.58341	4.09136	O48807 F2401.16 n=1 Tax=Arabidopsis thaliana RepID=O48807_ARATH
								Glyma12g13315	Gm12:11677168-11677785	1.20425	20.5332	4.09175	Q2I2S8 Ethylene-responsive element-binding protein n=1 Tax=Medicago truncatula RepID=Q2I2S8_MEDTR
								Glyma04g10870	Gm04:9120791-9122040	0.929458	15.8751	4.09423	O82161 Phi-1 protein n=1 Tax=Nicotiana tabacum RepID=O82161_TOBAC
								Glyma13g31931	Gm13:34247909-34249232	1.92494	32.9074	4.09552	Q9SXA8 T28P6.12 protein n=2 Tax=Arabidopsis thaliana RepID=Q9SXA8_ARATH
								Glyma17g17210	Gm17:14043858-14044850	1.37904	23.6054	4.09738	D7MA12 VQ motif-containing protein n=1 Tax=Arabidopsis lyrata subsp. lyrata RepID=D7MA12_ARALL
								Glyma18g49050	Gm18:58443229-58444662	0.300068	5.16611	4.10572	NA
								Glyma16g29750	Gm16:33452983-33456955	1.1383	19.6058	4.10633	Q71EE1 Heat shock protein n=1 Tax=Hevea brasiliensis RepID=Q71EE1_HEVBR
								Glyma04g03910	Gm04:2843279-2843912	1.0035	17.3132	4.10877	Q0PJI9 MYB transcription factor MYB124 n=1 Tax=Glycine max RepID=Q0PJI9_SOYBN
								Glyma14g36370	Gm14:45600180-45602734	0.577795	10.0038	4.11385	G7J450 Transcription factor bHLH93 n=1 Tax=Medicago truncatula RepID=G7J450_MEDTR
								Glyma17g07530	Gm17:5555580-5559220	2.08414	36.0896	4.11406	G7JEA0 Trehalose-6-phosphate synthase n=1 Tax=Medicago truncatula RepID=G7JEA0_MEDTR
								Glyma03g17001	Gm03:21619713-21628213	1.19024	20.6787	4.11882	G7L5K4 Peptide transporter PTR3-B n=1 Tax=Medicago truncatula RepID=G7L5K4_MEDTR
								Glyma02g37060	Gm02:42389326-42390531	1.30062	22.7085	4.12596	O82161 Phi-1 protein n=1 Tax=Nicotiana tabacum RepID=O82161_TOBAC
								Glyma13g01690	Gm13:1343940-1346280	3.2526	56.9085	4.12898	G7KBB5 Cytokinin-O-glucosyltransferase n=1 Tax=Medicago truncatula RepID=G7KBB5_MEDTR
								Glyma13g29870	Gm13:32719814-32720696	0.634107	11.1713	4.13892	NA
								Glyma10g41370	Gm10:48453872-48462018	0.926179	16.3651	4.14319	G7IC53 Protein TRANSPARENT TESTA n=1 Tax=Medicago truncatula RepID=G7IC53_MEDTR
								Glyma06g45290	Gm06:48065388-48066191	0.840631	14.8834	4.14609	NA
								Glyma17g11160	Gm17:8389332-8393430	0.406095	7.25189	4.15847	B9RLU0 Brassinosteroid LRR receptor kinase, putative n=1 Tax=Ricinus communis RepID=B9RLU0_RICCO
								Glyma13g37720	Gm13:38718006-38718776	8.42132	150.97	4.16407	NA
								Glyma19g40610	Gm19:46975407-46981467	1.2479	22.4029	4.16611	G7KTN5 Annotation was added to scaffolds in November 2011 Long-chain-fatty-acid-CoA ligase n=1 Tax=Medicago truncatula RepID=G7KTN5_MEDTR
								Glyma20g23540	Gm20:33383801-33385068	0.565203	10.1537	4.16709	Q9FTA0 GEM-like protein 4 n=1 Tax=Arabidopsis thaliana RepID=GEML4_ARATH
								Glyma01g41290	Gm01:52837390-52839262	18.7013	336.054	4.16748	G7JYL9 Protein TIFY n=2 Tax=Medicago truncatula RepID=G7JYL9_MEDTR
								Glyma13g07110	Gm13:7287387-7291220	2.53534	45.7177	4.1725	Q6RUF9 Proline dehydrogenase n=1 Tax=Glycine max RepID=Q6RUF9_SOYBN
								Glyma18g44161	Gm18:53812833-53814272	0.610868	11.0253	4.17381	F4IGE9 LURP1 protein n=2 Tax=Arabidopsis thaliana RepID=F4IGE9_ARATH
								Glyma03g25651	Gm03:32872620-32874014	2.12871	38.5371	4.1782	NA
								Glyma10g33970	Gm10:42166511-42170880	0.338291	6.12844	4.17918	G7ZYC8 Receptor-like protein kinase n=1 Tax=Medicago truncatula RepID=G7ZYC8_MEDTR
								Glyma11g37930	Gm11:38926273-38927290	0.464846	8.51065	4.19444	Q9FQY9 Avr9/Cf-9 rapidly elicited protein 75 n=1 Tax=Nicotiana tabacum RepID=Q9FQY9_TOBAC
								Glyma09g08290	Gm09:7403987-7406804	24.9889	457.896	4.19566	G7IIQ4 Protein TIFY 10B n=1 Tax=Medicago truncatula RepID=G7IIQ4_MEDTR
								Glyma08g12530	Gm08:9187751-9191224	1.15783	21.2389	4.19721	I3NNW1 Tau class glutathione S-transferase n=1 Tax=Glycine soja RepID=I3NNW1_GLYSO
								Glyma06g07560	Gm06:5491986-5493114	1.23965	22.7682	4.19902	Q8S8K8 Expressed protein n=1 Tax=Arabidopsis thaliana RepID=Q8S8K8_ARATH
								Glyma06g45400	Gm06:48123580-48124380	0.947402	17.439	4.2022	NA
								Glyma18g07220	Gm18:5870836-5876687	7.90249	146.36	4.21107	B9S358 Peptide transporter, putative n=1 Tax=Ricinus communis RepID=B9S358_RICCO
								Glyma08g07590	Gm08:5445856-5448085	6.85322	127.118	4.21324	Q9FE06 AT5g64260/MSJ1_10 n=1 Tax=Arabidopsis thaliana RepID=Q9FE06_ARATH
								Glyma14g06110	Gm14:4402781-4404086	8.79591	163.921	4.22002	NA
								Glyma10g01330	Gm10:980230-981520	0.532722	9.9428	4.2222	Q0PJH0 MYB transcription factor MYB111 (Fragment) n=2 Tax=Glycine max RepID=Q0PJH0_SOYBN
								Glyma07g16050	Gm07:15776096-15777085	1.27961	23.9801	4.22806	Q10BD4 Expressed protein n=2 Tax=Oryza sativa RepID=Q10BD4_ORYSJ
								Glyma08g04670	Gm08:3332483-3334322	0.960687	18.0118	4.22873	Q0PJK4 MYB transcription factor MYB84 n=1 Tax=Glycine max RepID=Q0PJK4_SOYBN
								Glyma13g29390	Gm13:32287998-32292836	4.72112	88.7777	4.233	B9S1A1 Flavonol synthase/flavanone 3-hydroxylase, putative n=1 Tax=Ricinus communis RepID=B9S1A1_RICCO
								Glyma13g22540	Gm13:26053763-26055047	1.05346	19.8666	4.23714	C1K028 Stress induced protein n=1 Tax=Vitis vinifera RepID=C1K028_VITVI
								Glyma19g38890	Gm19:45738314-45742815	0.612757	11.5689	4.23879	B9SDM2 Calcium-dependent protein kinase, putative n=1 Tax=Ricinus communis RepID=B9SDM2_RICCO
								Glyma17g10050	Gm17:7524022-7526123	6.43738	121.563	4.23909	B4UWC2 Gonadotropin beta chain n=1 Tax=Arachis hypogaea RepID=B4UWC2_ARAHY
								Glyma14g09620	Gm14:7694931-7696850	42.8714	813.56	4.24616	B9R733 GAST1 protein, putative n=1 Tax=Ricinus communis RepID=B9R733_RICCO
								Glyma09g38990	Gm09:44174582-44177712	25.4871	484.108	4.24749	P46519 Desiccation protectant protein Lea14 homolog n=2 Tax=Glycine max RepID=LEA14_SOYBN
								Glyma04g34890	Gm04:41162369-41163140	2.83433	53.8523	4.24793	Q9AUH7 UVI1 n=1 Tax=Pisum sativum RepID=Q9AUH7_PEA
								Glyma09g35250	Gm09:41452079-41455095	1.40799	26.7612	4.24843	B0L642 Abscisic acid 8'-hydroxylase n=1 Tax=Glycine max RepID=B0L642_SOYBN
								Glyma04g38560	Gm04:44929347-44935783	3.47434	66.1026	4.2499	B3IX39 Transcription factor NAC n=2 Tax=Lotus japonicus RepID=B3IX39_LOTJA
								Glyma13g01131	Gm13:853405-854390	0.449184	8.57162	4.25419	B9SAD7 Xyloglucan:xyloglucosyl transferase, putative n=1 Tax=Ricinus communis RepID=B9SAD7_RICCO
								Glyma18g43136	Gm18:52472821-52473822	23.0356	440.821	4.25826	G8A2N5 Leucoanthocyanidin dioxygenase n=2 Tax=Medicago truncatula RepID=G8A2N5_MEDTR
								Glyma06g10580	Gm06:8003999-8005179	0.352688	6.79088	4.26713	Q9FQY9 Avr9/Cf-9 rapidly elicited protein 75 n=1 Tax=Nicotiana tabacum RepID=Q9FQY9_TOBAC
								Glyma14g07660	Gm14:5788440-5792004	1.77192	34.2245	4.27165	Q84M78 Expressed protein n=1 Tax=Oryza sativa Japonica Group RepID=Q84M78_ORYSJ
								Glyma15g06120	Gm15:4337691-4343365	0.5004	9.6772	4.27344	G7IPL5 Riboflavin biosynthesis protein n=1 Tax=Medicago truncatula RepID=G7IPL5_MEDTR
								Glyma06g05780	Gm06:4143096-4144947	0.745078	14.4107	4.2736	Q9LVK2 Gb|AAD25600.1 n=1 Tax=Arabidopsis thaliana RepID=Q9LVK2_ARATH
								Glyma15g03110	Gm15:2169204-2171254	0.204147	3.95685	4.27668	Q9CAJ1 Hydroxyproline-rich glycoprotein family protein n=2 Tax=Arabidopsis thaliana RepID=Q9CAJ1_ARATH
								Glyma06g20980	Gm06:17389472-17391526	1.02758	19.9295	4.27758	B9RLX0 Thioredoxin II, putative n=1 Tax=Ricinus communis RepID=B9RLX0_RICCO
								Glyma18g49350	Gm18:58714256-58718635	2.52971	49.1925	4.28139	B9T740 60S ribosomal protein L34, putative n=1 Tax=Ricinus communis RepID=B9T740_RICCO
								Glyma13g44460	Gm13:43879551-43880745	2.04287	39.7445	4.28208	Q8H6R4 Jp18 n=1 Tax=Citrus trifoliata RepID=Q8H6R4_PONTR
								Glyma13g37870	Gm13:38797678-38803023	4.83129	94.115	4.28395	G7IRM9 Equilibrative nucleoside transporter n=1 Tax=Medicago truncatula RepID=G7IRM9_MEDTR
								Glyma08g10220	Gm08:7389998-7392203	1.16154	22.6913	4.28802	I3WTA4 Jasmonate ZIM domain protein f n=1 Tax=Nicotiana attenuata RepID=I3WTA4_NICAT
								Glyma03g00380	Gm03:170171-173533	1.7437	34.3578	4.30041	Q8S8Z7 Syringolide-induced protein B15-3-5 n=1 Tax=Glycine max RepID=Q8S8Z7_SOYBN
								Glyma14g06640	Gm14:4870107-4871815	0.613796	12.1257	4.30416	B5AE23 Nematode resistance HS1pro1 protein n=1 Tax=Glycine max RepID=B5AE23_SOYBN
								Glyma14g35720	Gm14:44785603-44788571	7.64964	151.519	4.30797	G7KBG3 Hydrolase, putative n=1 Tax=Medicago truncatula RepID=G7KBG3_MEDTR
								Glyma16g34720	Gm16:37295190-37301676	0.71165	14.1513	4.31362	Q8S8Z7 Syringolide-induced protein B15-3-5 n=1 Tax=Glycine max RepID=Q8S8Z7_SOYBN
								Glyma19g42220	Gm19:48238856-48245766	0.343946	6.89559	4.32542	H2E690 NADPH oxidase (Fragment) n=1 Tax=Phaseolus vulgaris RepID=H2E690_PHAVU
								Glyma19g02850	Gm19:2863202-2865406	0.688348	13.8097	4.3264	G7KKX5 NAC domain protein n=1 Tax=Medicago truncatula RepID=G7KKX5_MEDTR
								Glyma11g04460	Gm11:3034750-3040909	7.51671	150.902	4.32736	G7JZV2 Type I inositol-1,4,5-trisphosphate 5-phosphatase n=1 Tax=Medicago truncatula RepID=G7JZV2_MEDTR
								Glyma06g16440	Gm06:12910300-12912252	4.75733	95.8507	4.33256	B7FJL7 NAC-domain protein n=1 Tax=Medicago truncatula RepID=B7FJL7_MEDTR
								Glyma19g29031	Gm19:36593404-36596838	7.49074	151.413	4.33724	NA
								Glyma07g14750	Gm07:14558213-14560706	1.24975	25.2921	4.33897	B9RD53 GATA transcription factor, putative n=2 Tax=Malpighiales RepID=B9RD53_RICCO
								Glyma14g02350	Gm14:1417341-1419893	18.8583	385.884	4.35489	E7CQZ9 GLU n=1 Tax=Gossypium hirsutum RepID=E7CQZ9_GOSHI
								Glyma01g40880	Gm01:52520325-52524351	3.54679	73.0822	4.36493	A8IDV8 Inositol-1,4,5-triphosphate-5-phosphatase n=1 Tax=Solanum lycopersicum RepID=A8IDV8_SOLLC
								Glyma01g45370	Gm01:55685192-55685944	0.977174	20.1899	4.36888	G7K0W7 EPIDERMAL PATTERNING FACTOR-like protein n=1 Tax=Medicago truncatula RepID=G7K0W7_MEDTR
								Glyma01g04350	Gm01:3901049-3902869	4.05627	83.9547	4.37139	Q93Z89 Matrix metalloproteinase MMP2 n=1 Tax=Glycine max RepID=Q93Z89_SOYBN
								Glyma13g01150	Gm13:860852-862445	6.85223	142.822	4.3815	B9SJQ9 Xyloglucan endotransglucosylase/hydrolase protein 22, putative n=1 Tax=Ricinus communis RepID=B9SJQ9_RICCO
								Glyma17g05540	Gm17:3886223-3888669	4.38296	91.8181	4.3888	G7IIQ4 Protein TIFY 10B n=1 Tax=Medicago truncatula RepID=G7IIQ4_MEDTR
								Glyma06g12950	Gm06:10094213-10095083	1.1678	24.5615	4.39454	G7J664 Dof zinc finger protein n=1 Tax=Medicago truncatula RepID=G7J664_MEDTR
								Glyma02g13910	Gm02:12247013-12249762	1.80193	37.9721	4.39733	B9GHU3 GH3 family protein n=1 Tax=Populus trichocarpa RepID=B9GHU3_POPTR
								Glyma08g39390	Gm08:38930052-38933409	27.1544	576.669	4.40848	B9SHA0 Nucleoredoxin, putative n=1 Tax=Ricinus communis RepID=B9SHA0_RICCO
								Glyma07g29650	Gm07:34640178-34652411	0.129493	2.75023	4.4086	B9N4U2 2-oxoglutarate-dependent dioxygenase n=1 Tax=Populus trichocarpa RepID=B9N4U2_POPTR
								Glyma14g08860	Gm14:6886026-6897182	3.62648	77.514	4.41781	B9R7H1 Hydrolase, putative n=1 Tax=Ricinus communis RepID=B9R7H1_RICCO
								Glyma02g46171	Gm02:50202884-50204197	0.771699	16.5356	4.42139	NA
								Glyma11g05880	Gm11:4144002-4145460	0.216465	4.64205	4.42255	G3ECQ9 Rsmv23 protein n=1 Tax=Glycine max RepID=G3ECQ9_SOYBN
								Glyma19g02180	Gm19:1880523-1882646	4.42752	95.1755	4.42602	G7KK18 Mitochondrial chaperone BCS1 n=1 Tax=Medicago truncatula RepID=G7KK18_MEDTR
								Glyma04g20620	Gm04:23394181-23397250	0.770491	16.5905	4.42844	I1JW76 3-ketoacyl-CoA synthase n=1 Tax=Glycine max RepID=I1JW76_SOYBN
								Glyma10g01420	Gm10:1045011-1047613	1.66344	35.9064	4.432	B9RNA7 Glycerol-3-phosphate acyltransferase, putative n=1 Tax=Ricinus communis RepID=B9RNA7_RICCO
								Glyma02g42770	Gm02:47745850-47747189	0.412588	8.91443	4.43337	B6TQR4 Hypoxia induced protein conserved region containing protein n=1 Tax=Zea mays RepID=B6TQR4_MAIZE
								Glyma10g10501	Gm10:10259448-10267452	0.169651	3.67424	4.4368	B9SDM2 Calcium-dependent protein kinase, putative n=1 Tax=Ricinus communis RepID=B9SDM2_RICCO
								Glyma06g45280	Gm06:48063906-48064770	0.312831	6.84409	4.4514	Q04129 Wound induced protein (Fragment) n=1 Tax=Solanum lycopersicum RepID=Q04129_SOLLC
								Glyma20g27480	Gm20:36645283-36648487	0.39395	8.69315	4.4638	G7KDB1 Cysteine-rich receptor-like protein kinase n=1 Tax=Medicago truncatula RepID=G7KDB1_MEDTR
								Glyma10g42450	Gm10:49407139-49408980	2.62227	57.9953	4.46705	Q8S900 Syringolide-induced protein 1-3-1A n=1 Tax=Glycine max RepID=Q8S900_SOYBN
								Glyma06g10700	Gm06:8094346-8095687	2.38033	52.6567	4.46738	O82161 Phi-1 protein n=1 Tax=Nicotiana tabacum RepID=O82161_TOBAC
								Glyma03g07680	Gm03:8356471-8360793	14.0398	310.872	4.46873	G8A2N5 Leucoanthocyanidin dioxygenase n=2 Tax=Medicago truncatula RepID=G8A2N5_MEDTR
								Glyma01g19820	Gm01:24220923-24227067	5.33262	118.285	4.47128	G7K1K2 Monoglyceride lipase n=1 Tax=Medicago truncatula RepID=G7K1K2_MEDTR
								Glyma05g25830	Gm05:31890166-31894493	0.256001	5.69054	4.47434	G8G288 Flagellin-sensing 2-like protein n=1 Tax=Lotus japonicus RepID=G8G288_LOTJA
								Glyma02g03320	Gm02:2577693-2580038	0.977453	21.9208	4.48713	B6CAM2 Matrix metalloproteinase n=1 Tax=Glycine max RepID=B6CAM2_SOYBN
								Glyma20g04415	Gm20:4589177-4590591	0.895399	20.1183	4.48983	G7JZV2 Type I inositol-1,4,5-trisphosphate 5-phosphatase n=1 Tax=Medicago truncatula RepID=G7JZV2_MEDTR
								Glyma09g16673	Gm09:20042680-20045129	2.83869	63.7977	4.49021	D7KZN7 Aha1 domain-containing protein n=1 Tax=Arabidopsis lyrata subsp. lyrata RepID=D7KZN7_ARALL
								Glyma13g28630	Gm13:31636921-31639822	10.2738	231.575	4.49444	Q5F304 Beta-amylase n=1 Tax=Glycine max RepID=Q5F304_SOYBN
								Glyma12g32710	Gm12:36177159-36178512	2.30406	52.0219	4.49687	Q04129 Wound induced protein (Fragment) n=1 Tax=Solanum lycopersicum RepID=Q04129_SOLLC
								Glyma15g07850	Gm15:5522281-5524237	23.9787	544.77	4.50582	G7IP18 Asparagine synthetase n=1 Tax=Medicago truncatula RepID=G7IP18_MEDTR
								Glyma13g07590	Gm13:7785520-7787616	0.73808	16.7733	4.50624	G7KMR0 LOB domain-containing protein n=1 Tax=Medicago truncatula RepID=G7KMR0_MEDTR
								Glyma13g30660	Gm13:33204224-33209549	0.462847	10.5644	4.51253	G7IK73 Glutamate receptor 2.7 n=1 Tax=Medicago truncatula RepID=G7IK73_MEDTR
								Glyma15g01060	Gm15:648803-651163	0.679532	15.5898	4.51992	Q9SSC6 F18B13.21 protein n=1 Tax=Arabidopsis thaliana RepID=Q9SSC6_ARATH
								Glyma19g38570	Gm19:45458953-45460108	0.479429	11.0144	4.52193	Q75QH3 Hin1 like protein n=1 Tax=Capsicum chinense RepID=Q75QH3_CAPCH
								Glyma02g11610	Gm02:9792535-9794495	2.24059	51.5387	4.5237	Q8W3P8 Abscisate beta-glucosyltransferase n=1 Tax=Vigna angularis RepID=AOG_PHAAN
								Glyma15g05820	Gm15:4128636-4130620	3.54956	81.8413	4.52712	G7INU9 Peroxidase n=1 Tax=Medicago truncatula RepID=G7INU9_MEDTR
								Glyma02g38240	Gm02:43564154-43569687	1.90233	44.0213	4.53236	G7J450 Transcription factor bHLH93 n=1 Tax=Medicago truncatula RepID=G7J450_MEDTR
								Glyma13g37750	Gm13:38727941-38729157	4.56851	106.009	4.53632	NA
								Glyma16g08470	Gm16:7865858-7871116	4.12944	96.0768	4.54017	B9RKI5 Hyoscyamine 6-dioxygenase, putative n=1 Tax=Ricinus communis RepID=B9RKI5_RICCO
								Glyma06g46410	Gm06:49030582-49031782	0.198274	4.61439	4.54057	G7JEQ9 MAP kinase kinase kinase SSK2 n=1 Tax=Medicago truncatula RepID=G7JEQ9_MEDTR
								Glyma19g24640	Gm19:30294759-30301972	0.493132	11.4816	4.5412	Q6ZK44 Kelch repeat-containing protein-like n=1 Tax=Oryza sativa Japonica Group RepID=Q6ZK44_ORYSJ
								Glyma14g06100	Gm14:4402781-4404086	1.13867	26.5409	4.54279	G7K772 Abscisic acid receptor PYL6 n=1 Tax=Medicago truncatula RepID=G7K772_MEDTR
								Glyma01g22260	Gm01:27963645-27965402	6.95066	162.044	4.54309	G7JY94 AP2 domain-containing transcription factor n=1 Tax=Medicago truncatula RepID=G7JY94_MEDTR
								Glyma14g08801	Gm14:6800389-6807424	4.5694	107.196	4.55211	G7J5S7 Mitogen-activated protein kinase kinase kinase n=1 Tax=Medicago truncatula RepID=G7J5S7_MEDTR
								Glyma10g00470	Gm10:248103-250721	5.99966	141.096	4.55566	Q43447 Calmodulin n=1 Tax=Glycine max RepID=Q43447_SOYBN
								Glyma10g40320	Gm10:47768855-47769866	0.782169	18.4057	4.55653	D7LA14 Beta-1,4-xylosidase n=1 Tax=Arabidopsis lyrata subsp. lyrata RepID=D7LA14_ARALL
								Glyma03g00830	Gm03:546139-550967	6.08749	143.392	4.55797	G7L2P1 Protein TRANSPARENT TESTA n=2 Tax=Medicago truncatula RepID=G7L2P1_MEDTR
								Glyma13g27820	Gm13:30954041-30956040	1.01074	23.895	4.56323	G8A053 Basic 7S globulin n=1 Tax=Medicago truncatula RepID=G8A053_MEDTR
								Glyma17g04710	Gm17:3142417-3147382	0.71955	17.0284	4.5647	G7IQG1 WRKY transcription factor n=1 Tax=Medicago truncatula RepID=G7IQG1_MEDTR
								Glyma13g17130	Gm13:20947197-20952775	12.4664	295.306	4.5661	G7IGH7 Inter-alpha-trypsin inhibitor heavy chain H3 n=1 Tax=Medicago truncatula RepID=G7IGH7_MEDTR
								Glyma06g45410	Gm06:48125185-48125900	1.2497	29.6192	4.56688	Q04129 Wound induced protein (Fragment) n=1 Tax=Solanum lycopersicum RepID=Q04129_SOLLC
								Glyma19g05140	Gm19:5411084-5414885	0.891386	21.1739	4.57009	B9RTI7 Cation-transporting atpase plant, putative n=1 Tax=Ricinus communis RepID=B9RTI7_RICCO
								Glyma18g43142	Gm18:52476217-52479721	14.0122	336.04	4.58388	G8A2N5 Leucoanthocyanidin dioxygenase n=2 Tax=Medicago truncatula RepID=G8A2N5_MEDTR
								Glyma07g10180	Gm07:8509837-8511558	5.26652	126.907	4.59077	B9T596 LOB domain-containing protein, putative n=1 Tax=Ricinus communis RepID=B9T596_RICCO
								Glyma01g02580	Gm01:2119856-2122838	7.22853	174.369	4.5923	G7KGI0 Cinnamyl alcohol dehydrogenase n=1 Tax=Medicago truncatula RepID=G7KGI0_MEDTR
								Glyma06g47450	Gm06:49900317-49906453	8.88165	214.577	4.59452	G7IVJ4 Eugenol synthase n=1 Tax=Medicago truncatula RepID=G7IVJ4_MEDTR
								Glyma18g02400	Gm18:1503606-1504375	3.61672	87.7062	4.59993	NA
								Glyma03g36240	Gm03:43245464-43249873	0.180171	4.38225	4.60423	B9SDM2 Calcium-dependent protein kinase, putative n=1 Tax=Ricinus communis RepID=B9SDM2_RICCO
								Glyma05g36100	Gm05:39994165-39997441	6.41588	156.103	4.6047	G7LJN9 Inositol oxygenase n=2 Tax=Medicago truncatula RepID=G7LJN9_MEDTR
								Glyma11g33040	Gm11:34788478-34790047	2.90228	70.9039	4.61061	Q9LVB9 Emb|CAB83157.1 n=1 Tax=Arabidopsis thaliana RepID=Q9LVB9_ARATH
								Glyma12g33320	Gm12:36643832-36645408	0.791934	19.4454	4.6179	D9ZIU9 C3HL domain class transcription factor n=1 Tax=Malus x domestica RepID=D9ZIU9_MALDO
								Glyma03g24460	Gm03:31274480-31282345	0.11941	2.95311	4.62824	B9SKI2 Sterol desaturase, putative n=1 Tax=Ricinus communis RepID=B9SKI2_RICCO
								Glyma19g05570	Gm19:6087841-6091946	4.90858	121.564	4.63026	Q6RUF9 Proline dehydrogenase n=1 Tax=Glycine max RepID=Q6RUF9_SOYBN
								Glyma08g05810	Gm08:4131807-4133296	16.2985	409.361	4.65056	Q93YA8 Calcium binding protein n=1 Tax=Sesbania rostrata RepID=Q93YA8_SESRO
								Glyma03g32520	Gm03:40242138-40250272	0.0659439	1.6565	4.65075	Q1M2R7 PDR-like ABC-transporter n=1 Tax=Glycine max RepID=Q1M2R7_SOYBN
								Glyma15g08120	Gm15:5715288-5717751	0.702743	17.6555	4.65098	Q9SUU4 AT4g32480/F8B4_180 n=1 Tax=Arabidopsis thaliana RepID=Q9SUU4_ARATH
								Glyma06g04490	Gm06:3151376-3153511	2.17495	55.6483	4.67728	C5IU97 Drought responsive element binding protein 2 n=1 Tax=Glycine max RepID=C5IU97_SOYBN
								Glyma11g35310	Gm11:36993290-36998252	0.609412	15.5977	4.67777	Q6TM10 Phospholipase C n=1 Tax=Vigna radiata RepID=Q6TM10_VIGRA
								Glyma13g35100	Gm13:36579531-36581440	15.7218	413.484	4.717	B9SQI2 Copper ion binding protein, putative n=1 Tax=Ricinus communis RepID=B9SQI2_RICCO
								Glyma11g04620	Gm11:3138658-3142142	2.39167	63.2179	4.72424	NA
								Glyma14g05355	Gm14:3788355-3790613	0.942428	24.9541	4.72675	O04076 ACC-oxidase n=1 Tax=Vigna angularis RepID=O04076_PHAAN
								Glyma13g35550	Gm13:36983073-36984757	4.58287	122.435	4.73962	B2ZGR7 NAC domain protein n=1 Tax=Glycine max RepID=B2ZGR7_SOYBN
								Glyma19g06280	Gm19:7146629-7148631	0.22607	6.16099	4.76832	G7KMR0 LOB domain-containing protein n=1 Tax=Medicago truncatula RepID=G7KMR0_MEDTR
								Glyma15g26790	Gm15:28917915-28919429	17.9803	492.625	4.776	C6FF63 Leucine-rich repeat protein n=1 Tax=Glycine max RepID=C6FF63_SOYBN
								Glyma11g09250	Gm11:6537512-6545558	0.172804	4.74853	4.78027	G7K1C3 Transporter, putative n=1 Tax=Medicago truncatula RepID=G7K1C3_MEDTR
								Glyma07g18280	Gm07:18088907-18093107	7.32919	201.875	4.78367	G8A2N5 Leucoanthocyanidin dioxygenase n=2 Tax=Medicago truncatula RepID=G8A2N5_MEDTR
								Glyma13g37770	Gm13:38733622-38734473	1.09185	30.2334	4.79129	Q04129 Wound induced protein (Fragment) n=1 Tax=Solanum lycopersicum RepID=Q04129_SOLLC
								Glyma11g04690	Gm11:3223179-3225861	0.119882	3.33803	4.79931	G7K134 BHLH transcription factor n=1 Tax=Medicago truncatula RepID=G7K134_MEDTR
								Glyma16g08340	Gm16:7617006-7620540	0.382809	10.7169	4.80713	Q0H212 Abscisic acid 8'-hydroxylase n=1 Tax=Phaseolus vulgaris RepID=Q0H212_PHAVU
								Glyma18g43210	Gm18:52648673-52651977	4.973	139.608	4.81112	F4ZE80 Chloroplast fatty acid desaturase 7 n=1 Tax=Glycine max RepID=F4ZE80_SOYBN
								Glyma12g02550	Gm12:1670872-1672933	2.07682	58.315	4.81142	B9T775 Beta-expansin 1a, putative n=1 Tax=Ricinus communis RepID=B9T775_RICCO
								Glyma07g33880	Gm07:38814436-38816833	0.364271	10.3007	4.82159	Q8W3P8 Abscisate beta-glucosyltransferase n=1 Tax=Vigna angularis RepID=AOG_PHAAN
								Glyma06g04010	Gm06:2793381-2795033	0.328267	9.30984	4.82581	Q0PJI9 MYB transcription factor MYB124 n=1 Tax=Glycine max RepID=Q0PJI9_SOYBN
								Glyma17g07270	Gm17:5308762-5310295	1.98366	56.4293	4.83021	Q8S902 Syringolide-induced protein 19-1-5 n=1 Tax=Glycine max RepID=Q8S902_SOYBN
								Glyma17g12610	Gm17:9496673-9506155	4.62664	132.183	4.83642	A3FGC9 Early nodulin 93 protein n=1 Tax=Populus alba x Populus tremula var. glandulosa RepID=A3FGC9_9ROSI
								Glyma17g35430	Gm17:39398378-39400154	0.720554	20.6087	4.838	P93166 SCOF-1 n=1 Tax=Glycine max RepID=P93166_SOYBN
								Glyma12g34420	Gm12:37562764-37566449	3.45418	99.4292	4.84726	G7ITP3 GRAS family transcription factor n=1 Tax=Medicago truncatula RepID=G7ITP3_MEDTR
								Glyma17g11310	Gm17:8500344-8501219	0.741249	21.3424	4.84762	Q9FYR1 Gb|AAD20160.1 n=1 Tax=Arabidopsis thaliana RepID=Q9FYR1_ARATH
								Glyma09g00800	Gm09:426648-427917	0.151388	4.36663	4.8502	B9RXH7 ATP binding protein, putative n=1 Tax=Ricinus communis RepID=B9RXH7_RICCO
								Glyma18g05140	Gm18:3876235-3882939	16.539	477.985	4.85302	G7J7X8 Polyamine oxidase n=2 Tax=Medicago truncatula RepID=G7J7X8_MEDTR
								Glyma15g03580	Gm15:2485385-2485811	1.41928	41.1328	4.85705	NA
								Glyma04g02280	Gm04:1582344-1584513	0.410758	11.9349	4.86076	Q8S901 Syringolide-induced protein 14-1-1 n=1 Tax=Glycine max RepID=Q8S901_SOYBN
								Glyma20g32730	Gm20:41365781-41367293	0.777289	23.2685	4.90379	Q45EZ4 RAV-like DNA-binding protein n=1 Tax=Glycine max RepID=Q45EZ4_SOYBN
								Glyma12g32690	Gm12:36172633-36173553	0.96681	29.0216	4.90775	Q04129 Wound induced protein (Fragment) n=1 Tax=Solanum lycopersicum RepID=Q04129_SOLLC
								Glyma08g16190	Gm08:11809098-11812372	6.29573	191.393	4.92602	G7IWI2 DNA binding protein n=1 Tax=Medicago truncatula RepID=G7IWI2_MEDTR
								Glyma13g04630	Gm13:4936595-4938693	4.10287	125.544	4.93542	B3IX35 Transcription factor C2H2 n=1 Tax=Lotus japonicus RepID=B3IX35_LOTJA
								Glyma09g24410	Gm09:30139623-30143224	2.05634	63.0746	4.93891	Q71EE1 Heat shock protein n=1 Tax=Hevea brasiliensis RepID=Q71EE1_HEVBR
								Glyma04g04240	Gm04:3156970-3159037	0.44002	13.6315	4.95323	Q00M85 N-hydroxycinnamoyl/benzoyltransferase 5 n=2 Tax=Glycine max RepID=Q00M85_SOYBN
								Glyma11g04210	Gm11:2795865-2799433	1.53846	48.2315	4.97042	Q5F305 Beta-amylase n=1 Tax=Glycine max RepID=Q5F305_SOYBN
								Glyma10g31240	Gm10:39797254-39798964	8.3457	261.834	4.97147	G7I5M0 F-box protein PP2-B1 n=1 Tax=Medicago truncatula RepID=G7I5M0_MEDTR
								Glyma06g13110	Gm06:10255498-10257429	1.45517	45.9316	4.98022	G7J6S0 Protein RUPTURED POLLEN GRAIN n=1 Tax=Medicago truncatula RepID=G7J6S0_MEDTR
								Glyma20g24970	Gm20:34632195-34633914	1.35568	42.8437	4.98199	NA
								Glyma0245s00210	scaffold_245:15080-15882	1.47059	46.8973	4.99503	NA
								Glyma12g12880	Gm12:11274912-11276387	0.500303	15.9941	4.99859	G7JTT7 Transcription factor bHLH36 n=1 Tax=Medicago truncatula RepID=G7JTT7_MEDTR
								Glyma09g01900	Gm09:1240416-1241206	0.399302	12.7794	5.00019	NA
								Glyma16g26860	Gm16:30956314-30959789	0.253618	8.13071	5.00265	A2Q5Q4 Glucan endo-1,3-beta-glucosidase n=1 Tax=Medicago truncatula RepID=A2Q5Q4_MEDTR
								Glyma16g04380	Gm16:3705832-3708868	10.2945	330.74	5.00575	NA
								Glyma07g18350	Gm07:18262634-18265754	6.142	198.789	5.01638	C4MH52 Chloroplast omega 3 fatty acid desaturase isoform 2 n=1 Tax=Glycine max RepID=C4MH52_SOYBN
								Glyma15g10070	Gm15:7288093-7290608	2.27986	74.2933	5.02621	Q9XG83 Gibberellin 2-beta-dioxygenase n=1 Tax=Phaseolus coccineus RepID=G2OX_PHACN
								Glyma08g23380	Gm08:17848729-17851238	2.5294	82.4995	5.02752	B0LUR7 Transcription factor n=1 Tax=Glycine max RepID=B0LUR7_SOYBN
								Glyma06g03860	Gm06:2702211-2706409	2.25296	73.6633	5.03105	B9NBP7 Cytochrome P450 n=1 Tax=Populus trichocarpa RepID=B9NBP7_POPTR
								Glyma02g42470	Gm02:47510524-47514420	3.02258	98.8757	5.03177	G7K244 1-aminocyclopropane-1-carboxylate oxidase n=1 Tax=Medicago truncatula RepID=G7K244_MEDTR
								Glyma16g00520	Gm16:194855-196453	0.439174	14.4024	5.03538	G7IN97 Metallothiol transferase fosB n=1 Tax=Medicago truncatula RepID=G7IN97_MEDTR
								Glyma06g07480	Gm06:5437072-5442126	0.25448	8.36457	5.03867	G7JBM4 Anion exchanger family protein n=1 Tax=Medicago truncatula RepID=G7JBM4_MEDTR
								Glyma08g38740	Gm08:37936030-37936875	3.71248	122.924	5.04924	NA
								Glyma13g10441	Gm13:12286145-12287408	0.791533	26.3324	5.05605	NA
								Glyma10g02080	Gm10:1470998-1472857	0.11553	3.92315	5.08568	D9ICY5 ERF protein n=1 Tax=Glycine max RepID=D9ICY5_SOYBN
								Glyma11g11280	Gm11:8028062-8028927	0.829441	28.1868	5.08674	H6VUT8 Heat shock protein (Fragment) n=1 Tax=Ammopiptanthus mongolicus RepID=H6VUT8_9FABA
								Glyma19g27260	Gm19:34545933-34548784	2.48069	84.7173	5.09384	G7KW78 GEM-like protein n=1 Tax=Medicago truncatula RepID=G7KW78_MEDTR
								Glyma03g31980	Gm03:39817006-39819064	0.744284	25.5442	5.101	Q02993 Protein 2 n=1 Tax=Petunia x hybrida RepID=Q02993_PETHY
								Glyma01g04340	Gm01:3894968-3896837	0.171491	5.97344	5.12236	G7K5I2 WD repeat-containing protein-like protein n=1 Tax=Medicago truncatula RepID=G7K5I2_MEDTR
								Glyma12g35000	Gm12:38104158-38106375	2.24261	78.4561	5.12864	Q52QR2 NAC domain protein NAC4 n=1 Tax=Glycine max RepID=Q52QR2_SOYBN
								Glyma13g00480	Gm13:234714-237019	3.60974	126.463	5.13068	G7IG90 Transcription factor bHLH n=1 Tax=Medicago truncatula RepID=G7IG90_MEDTR
								Glyma13g25620	Gm13:28830704-28838320	2.12347	74.824	5.139	G7J342 Membrane protein, putative n=1 Tax=Medicago truncatula RepID=G7J342_MEDTR
								Glyma07g10030	Gm07:8420867-8422597	1.12992	39.8782	5.14131	Q42447 Maturation protein n=1 Tax=Glycine max RepID=Q42447_SOYBN
								Glyma05g01436	Gm05:934460-938130	1.40592	49.7123	5.14401	Q9FRU6 Nitrate transporter NRT1-1 n=1 Tax=Glycine max RepID=Q9FRU6_SOYBN
								Glyma12g01120	Gm12:632601-632745	57.5424	2063.58	5.16438	Q6IM91 DVL10 n=1 Tax=Arabidopsis thaliana RepID=Q6IM91_ARATH
								Glyma15g10630	Gm15:7723501-7728012	0.307419	11.0794	5.17153	G7IFL9 Sugar transporter ERD6-like protein n=1 Tax=Medicago truncatula RepID=G7IFL9_MEDTR
								Glyma10g41130	Gm10:48311464-48312596	0.276897	10.0533	5.18217	NA
								Glyma01g29930	Gm01:40499102-40503250	8.81757	321.163	5.18678	G8A2N5 Leucoanthocyanidin dioxygenase n=2 Tax=Medicago truncatula RepID=G8A2N5_MEDTR
								Glyma06g12010	Gm06:9257930-9261992	0.231227	8.43872	5.18964	I1KAB0 Aldehyde dehydrogenase n=1 Tax=Glycine max RepID=I1KAB0_SOYBN
								Glyma17g03155	Gm17:2122353-2125027	0.329838	12.061	5.19245	B9RT88 Ring finger protein, putative n=1 Tax=Ricinus communis RepID=B9RT88_RICCO
								Glyma14g39300	Gm14:48423945-48425830	0.418642	15.4864	5.20914	G7KFZ3 U-box domain-containing protein n=2 Tax=Medicago truncatula RepID=G7KFZ3_MEDTR
								Glyma04g07390	Gm04:5725878-5731226	1.13952	42.6176	5.22495	G7JBM4 Anion exchanger family protein n=1 Tax=Medicago truncatula RepID=G7JBM4_MEDTR
								Glyma02g38580	Gm02:43971321-43973260	0.179551	6.74287	5.2309	Q9LV18 Emb|CAA16536.1 n=1 Tax=Arabidopsis thaliana RepID=Q9LV18_ARATH
								Glyma07g02630	Gm07:1769989-1772543	5.67175	214.457	5.24075	B0LUR7 Transcription factor n=1 Tax=Glycine max RepID=B0LUR7_SOYBN
								Glyma20g16531	Gm20:23066558-23067667	0.790917	30.1868	5.25425	NA
								Glyma11g36030	Gm11:37590204-37591067	2.19352	85.0206	5.27649	NA
								Glyma11g31310	Gm11:32350216-32353474	0.394854	15.5824	5.30245	G7J0X9 2-succinylbenzoate-CoA ligase n=1 Tax=Medicago truncatula RepID=G7J0X9_MEDTR
								Glyma01g35660	Gm01:48174704-48177832	1.49846	59.619	5.31422	B0L642 Abscisic acid 8'-hydroxylase n=1 Tax=Glycine max RepID=B0L642_SOYBN
								Glyma06g44660	Gm06:47521094-47522649	0.452212	18.344	5.34216	G7JTT7 Transcription factor bHLH36 n=1 Tax=Medicago truncatula RepID=G7JTT7_MEDTR
								Glyma13g18410	Gm13:22080810-22082357	0.291288	12.0695	5.37278	G8EW00 Ethylene response factor 5 n=1 Tax=Medicago sativa RepID=G8EW00_MEDSA
								Glyma06g41500	Gm06:44776016-44779621	1.20765	50.3848	5.38271	G7ITP3 GRAS family transcription factor n=1 Tax=Medicago truncatula RepID=G7ITP3_MEDTR
								Glyma04g04355	Gm04:3224155-3226269	1.39984	58.4212	5.38316	C5IU97 Drought responsive element binding protein 2 n=1 Tax=Glycine max RepID=C5IU97_SOYBN
								Glyma02g01960	Gm02:1429083-1430853	1.69235	70.6616	5.38382	D9ICY5 ERF protein n=1 Tax=Glycine max RepID=D9ICY5_SOYBN
								Glyma13g36120	Gm13:37453218-37456622	2.22575	92.9349	5.38386	G7ITP3 GRAS family transcription factor n=1 Tax=Medicago truncatula RepID=G7ITP3_MEDTR
								Glyma01g32360	Gm01:43828911-43832736	0.334916	14.1934	5.40528	B9SZA2 Aspartate aminotransferase n=1 Tax=Ricinus communis RepID=B9SZA2_RICCO
								Glyma13g01140	Gm13:857862-859396	1.60146	68.0446	5.40902	G7JD12 Xyloglucan endotransglucosylase/hydrolase n=1 Tax=Medicago truncatula RepID=G7JD12_MEDTR
								Glyma05g02760	Gm05:2116729-2120463	0.749387	32.5139	5.4392	O81970 Cytochrome P450 71A9 n=1 Tax=Glycine max RepID=C71A9_SOYBN
								Glyma07g16830	Gm07:16494057-16495340	1.97141	86.4011	5.45375	P32110 Probable glutathione S-transferase n=2 Tax=Glycine max RepID=GSTX6_SOYBN
								Glyma14g35340	Gm14:44234276-44235627	3.32057	146.367	5.46202	O82161 Phi-1 protein n=1 Tax=Nicotiana tabacum RepID=O82161_TOBAC
								Glyma06g44450	Gm06:47374827-47378135	2.94742	131.707	5.48174	B9RVV7 Protein phosphatase 2c, putative n=1 Tax=Ricinus communis RepID=B9RVV7_RICCO
								Glyma13g33300	Gm13:35186039-35188050	0.843057	37.7127	5.48328	Q4W8C3 Gibberellin 2-oxidase n=1 Tax=Vigna angularis RepID=Q4W8C3_PHAAN
								Glyma19g40220	Gm19:46661001-46661586	0.660761	29.8841	5.4991	D7LZS6 Zinc finger family protein n=1 Tax=Arabidopsis lyrata subsp. lyrata RepID=D7LZS6_ARALL
								Glyma18g01340	Gm18:701670-703255	1.08168	48.9373	5.49959	G7J2H3 B12D protein n=1 Tax=Medicago truncatula RepID=G7J2H3_MEDTR
								Glyma17g07280	Gm17:5312961-5314439	0.451788	20.472	5.50186	B9SJQ9 Xyloglucan endotransglucosylase/hydrolase protein 22, putative n=1 Tax=Ricinus communis RepID=B9SJQ9_RICCO
								Glyma13g29070	Gm13:32022432-32025655	0.77112	35.5463	5.5266	G7LE60 Protein TIFY 5A n=1 Tax=Medicago truncatula RepID=G7LE60_MEDTR
								Glyma20g25406	Gm20:35096068-35099538	0.204121	9.529	5.54483	G7IC81 Wall-associated receptor kinase-like protein n=1 Tax=Medicago truncatula RepID=G7IC81_MEDTR
								Glyma20g26140	Gm20:35669990-35670959	1.08759	51.4079	5.56279	NA
								Glyma14g35220	Gm14:44046704-44048952	3.52793	167.527	5.56943	G7KBB5 Cytokinin-O-glucosyltransferase n=1 Tax=Medicago truncatula RepID=G7KBB5_MEDTR
								Glyma13g06880	Gm13:7043300-7045825	0.108618	5.18869	5.57803	B2Y2W4 Cytochrome P450 (Fragment) n=1 Tax=Trifolium repens RepID=B2Y2W4_TRIRP
								Glyma10g33810	Gm10:42065517-42067253	1.26841	60.6509	5.57944	G7I303 Ethylene-responsive transcription factor n=1 Tax=Medicago truncatula RepID=G7I303_MEDTR
								Glyma14g14380	Gm14:14349122-14352657	0.178902	8.75547	5.61294	G7JB14 SYNC1 protein n=1 Tax=Medicago truncatula RepID=G7JB14_MEDTR
								Glyma08g04750	Gm08:3378789-3379775	0.314337	15.9763	5.66748	NA
								Glyma11g09070	Gm11:6412775-6417798	1.42721	72.739	5.67146	G7K031 Serine/threonine protein kinase n=1 Tax=Medicago truncatula RepID=G7K031_MEDTR
								Glyma04g11870	Gm04:10613650-10616162	0.72606	37.309	5.68329	B3TDK8 Lipoxygenase n=1 Tax=Glycine max RepID=B3TDK8_SOYBN
								Glyma12g05320	Gm12:3532923-3533668	0.451523	23.2551	5.6866	NA
								Glyma11g08240	Gm11:5836829-5838915	6.80098	354.857	5.70535	G7JW96 Thaumatin-like protein n=1 Tax=Medicago truncatula RepID=G7JW96_MEDTR
								Glyma17g07250	Gm17:5300169-5301673	3.71783	194.655	5.71032	G7JD12 Xyloglucan endotransglucosylase/hydrolase n=1 Tax=Medicago truncatula RepID=G7JD12_MEDTR
								Glyma08g06340	Gm08:4493969-4495511	2.45348	129.808	5.72541	B9H220 F-box family protein n=1 Tax=Populus trichocarpa RepID=B9H220_POPTR
								Glyma03g39180	Gm03:45362081-45365372	0.774629	41.0574	5.72799	B6TKI3 Calmodulin binding protein n=1 Tax=Zea mays RepID=B6TKI3_MAIZE
								Glyma03g40170	Gm03:45985247-45990602	0.230017	12.3266	5.7439	B9REZ8 ATP binding protein, putative n=1 Tax=Ricinus communis RepID=B9REZ8_RICCO
								Glyma05g32050	Gm05:37038591-37038922	2.50382	134.853	5.75112	NA
								Glyma19g32920	Gm19:40616474-40617933	0.29055	15.6861	5.75455	Q01417 18 kDa seed maturation protein n=2 Tax=Glycine max RepID=PM1_SOYBN
								Glyma05g32850	Gm05:37649730-37651660	1.80526	98.0351	5.76302	B2ZGR9 NAC domain protein (Fragment) n=1 Tax=Glycine max RepID=B2ZGR9_SOYBN
								Glyma11g10240	Gm11:7364889-7367032	6.33305	344.891	5.7671	B9T775 Beta-expansin 1a, putative n=1 Tax=Ricinus communis RepID=B9T775_RICCO
								Glyma16g27950	Gm16:31897305-31900259	0.42703	23.6695	5.79255	B3IX37 Transcription factor AP2-EREBP n=1 Tax=Lotus japonicus RepID=B3IX37_LOTJA
								Glyma06g24480	Gm06:21873384-21876315	0.252353	14.0076	5.79463	I1KDA1 3-ketoacyl-CoA synthase n=1 Tax=Glycine max RepID=I1KDA1_SOYBN
								Glyma13g33290	Gm13:35172356-35174467	1.70397	97.23	5.83443	Q4W8C3 Gibberellin 2-oxidase n=1 Tax=Vigna angularis RepID=Q4W8C3_PHAAN
								Glyma01g44930	Gm01:55401130-55406863	5.16739	299.56	5.85727	G7K2C5 Hexose transporter n=1 Tax=Medicago truncatula RepID=G7K2C5_MEDTR
								Glyma12g32750	Gm12:36186117-36186790	0.740267	43.0493	5.8618	Q04129 Wound induced protein (Fragment) n=1 Tax=Solanum lycopersicum RepID=Q04129_SOLLC
								Glyma11g35050	Gm11:36780107-36781950	2.20068	130.094	5.88546	B5AE23 Nematode resistance HS1pro1 protein n=1 Tax=Glycine max RepID=B5AE23_SOYBN
								Glyma02g35350	Gm02:40092253-40093510	0.331131	19.7431	5.8978	B9SDI7 Spotted leaf protein, putative n=1 Tax=Ricinus communis RepID=B9SDI7_RICCO
								Glyma14g11151	Gm14:9466722-9474079	1.03912	62.6913	5.91483	Q58G09 Chalcone-flavanone isomerase-like protein n=2 Tax=Arabidopsis thaliana RepID=Q58G09_ARATH
								Glyma12g31900	Gm12:35441740-35443880	2.53722	154.885	5.9318	A2Q4H3 Prefoldin n=1 Tax=Medicago truncatula RepID=A2Q4H3_MEDTR
								Glyma11g34780	Gm11:36590876-36593934	2.97991	185.094	5.95684	F1LIZ9 Proline transporter 2 n=1 Tax=Vigna unguiculata RepID=F1LIZ9_VIGUN
								Glyma09g38850	Gm09:44104852-44108058	0.169313	10.7587	5.98967	D3KU57 LysM type receptor kinase n=1 Tax=Lotus japonicus RepID=D3KU57_LOTJA
								Glyma10g32190	Gm10:40635839-40638465	1.84252	118.282	6.00441	Q39890 Calmodulin n=1 Tax=Glycine max RepID=Q39890_SOYBN
								Glyma10g11700	Gm10:12029400-12038336	0.457204	29.592	6.01623	B9RVL4 Polyamine oxidase, putative n=1 Tax=Ricinus communis RepID=B9RVL4_RICCO
								Glyma15g11140	Gm15:8165598-8167132	0.16771	11.002	6.03565	G8A053 Basic 7S globulin n=1 Tax=Medicago truncatula RepID=G8A053_MEDTR
								Glyma20g29440	Gm20:38291392-38293010	0.817708	55.2814	6.07906	G7IBZ9 Ethylene-responsive transcription factor ERF026 n=1 Tax=Medicago truncatula RepID=G7IBZ9_MEDTR
								Glyma03g36100	Gm03:43110184-43112030	1.20115	82.2636	6.09777	B9SDI7 Spotted leaf protein, putative n=1 Tax=Ricinus communis RepID=B9SDI7_RICCO
								Glyma13g38590	Gm13:39362140-39364356	1.13969	78.5304	6.10654	A2Q4H3 Prefoldin n=1 Tax=Medicago truncatula RepID=A2Q4H3_MEDTR
								Glyma17g06610	Gm17:4728731-4735414	4.55883	321.729	6.14104	G7IG90 Transcription factor bHLH n=1 Tax=Medicago truncatula RepID=G7IG90_MEDTR
								Glyma15g40761	Gm15:47738603-47739525	1.95048	142.641	6.19242	Q9SKX9 Expressed protein n=1 Tax=Arabidopsis thaliana RepID=Q9SKX9_ARATH
								Glyma07g08311	Gm07:6906291-6907736	0.194742	14.6815	6.23629	H9DXV8 BAP1 n=1 Tax=Vitis vinifera RepID=H9DXV8_VITVI
								Glyma18g05700	Gm18:4342588-4345137	0.841785	63.7318	6.24242	I3NMN6 60S ribosomal protein L10B n=1 Tax=Hevea brasiliensis RepID=I3NMN6_HEVBR
								Glyma08g05000	Gm08:3577536-3579403	0.589656	44.9297	6.25165	G7LAJ8 Nudix hydrolase n=1 Tax=Medicago truncatula RepID=G7LAJ8_MEDTR
								Glyma02g03420	Gm02:2710293-2712667	7.9118	604.897	6.25654	G7K464 N-hydroxythioamide S-beta-glucosyltransferase n=1 Tax=Medicago truncatula RepID=G7K464_MEDTR
								Glyma14g08000	Gm14:6047574-6049622	0.669609	51.8032	6.27358	G7I5L0 F-box protein PP2-B1 n=1 Tax=Medicago truncatula RepID=G7I5L0_MEDTR
								Glyma11g16120	Gm11:11840247-11841592	0.354009	27.6306	6.28634	NA
								Glyma12g31150	Gm12:34747770-34749519	0.269583	21.2234	6.29878	G7IHF4 NAC domain protein n=1 Tax=Medicago truncatula RepID=G7IHF4_MEDTR
								Glyma11g11430	Gm11:8137919-8139878	1.12349	90.7756	6.33625	G7LC08 ERD7 protein n=1 Tax=Medicago truncatula RepID=G7LC08_MEDTR
								Glyma18g45920	Gm18:55624578-55625598	0.547386	44.3202	6.33926	H9DXV8 BAP1 n=1 Tax=Vitis vinifera RepID=H9DXV8_VITVI
								Glyma08g18230	Gm08:13693732-13694661	1.67129	139.647	6.38468	Q9SKX9 Expressed protein n=1 Tax=Arabidopsis thaliana RepID=Q9SKX9_ARATH
								Glyma15g05810	Gm15:4124246-4126486	0.182803	15.8139	6.43476	P22196 Cationic peroxidase 2 n=1 Tax=Arachis hypogaea RepID=PER2_ARAHY
								Glyma10g38420	Gm10:46222667-46224567	0.325348	28.6476	6.46029	G7IBZ9 Ethylene-responsive transcription factor ERF026 n=1 Tax=Medicago truncatula RepID=G7IBZ9_MEDTR
								Glyma03g37310	Gm03:43971997-43972921	1.26216	111.506	6.46507	Q9SP01 Indole-3-acetic acid induced protein ARG-2 homolog n=1 Tax=Glycine max RepID=Q9SP01_SOYBN
								Glyma06g15341	Gm06:12093860-12096114	0.578997	52.7637	6.50985	G7JAD3 Ethylene-responsive transcription factor ERF110 n=1 Tax=Medicago truncatula RepID=G7JAD3_MEDTR
								Glyma03g38000	Gm03:44447850-44454338	0.206876	20.167	6.60709	G7KTN5 Annotation was added to scaffolds in November 2011 Long-chain-fatty-acid-CoA ligase n=1 Tax=Medicago truncatula RepID=G7KTN5_MEDTR
								Glyma09g38691	Gm09:43989645-43996262	0.122	11.9813	6.61776	G7ILG8 Lysine ketoglutarate reductase trans-splicing-like protein n=1 Tax=Medicago truncatula RepID=G7ILG8_MEDTR
								Glyma08g08810	Gm08:6278475-6284192	0.815313	80.305	6.62199	G8G288 Flagellin-sensing 2-like protein n=1 Tax=Lotus japonicus RepID=G8G288_LOTJA
								Glyma12g32725	Gm12:36179773-36180915	0.383729	38.0842	6.63296	Q04129 Wound induced protein (Fragment) n=1 Tax=Solanum lycopersicum RepID=Q04129_SOLLC
								Glyma13g01120	Gm13:850858-852473	0.70489	72.7764	6.68993	Q8S902 Syringolide-induced protein 19-1-5 n=1 Tax=Glycine max RepID=Q8S902_SOYBN
								Glyma12g16750	Gm12:16303173-16306780	0.252162	26.316	6.70545	G7ITP3 GRAS family transcription factor n=1 Tax=Medicago truncatula RepID=G7ITP3_MEDTR
								Glyma07g16810	Gm07:16487914-16489535	2.25492	240.003	6.73383	P32110 Probable glutathione S-transferase n=2 Tax=Glycine max RepID=GSTX6_SOYBN
								Glyma02g42180	Gm02:47265627-47267487	0.917634	98.9428	6.75253	G7KBY0 BAHD acyltransferase DCR n=1 Tax=Medicago truncatula RepID=G7KBY0_MEDTR
								Glyma19g34740	Gm19:42344177-42346426	0.37716	41.5636	6.784	Q02993 Protein 2 n=1 Tax=Petunia x hybrida RepID=Q02993_PETHY
								Glyma13g16950	Gm13:20811386-20813635	2.29734	264.72	6.84836	B9RRB8 12-oxophytodienoate reductase opr, putative n=1 Tax=Ricinus communis RepID=B9RRB8_RICCO
								Glyma12g13290	Gm12:11630139-11633239	2.1985	282.8	7.00712	B9RVV7 Protein phosphatase 2c, putative n=1 Tax=Ricinus communis RepID=B9RVV7_RICCO
								Glyma02g08835	Gm02:6830706-6833818	0.528155	71.2685	7.07616	B3IX37 Transcription factor AP2-EREBP n=1 Tax=Lotus japonicus RepID=B3IX37_LOTJA
								Glyma15g07720	Gm15:5447567-5451066	1.86056	268.28	7.17186	G7IP18 Asparagine synthetase n=1 Tax=Medicago truncatula RepID=G7IP18_MEDTR
								Glyma14g06400	Gm14:4655305-4659067	0.516439	78.2511	7.24337	G7K244 1-aminocyclopropane-1-carboxylate oxidase n=1 Tax=Medicago truncatula RepID=G7K244_MEDTR
								Glyma11g06430	Gm11:4552980-4553818	0.99359	163.411	7.36164	Q40248 mRNA, clone: LRG11 n=1 Tax=Lactuca sativa RepID=Q40248_LACSA
								Glyma05g32040	Gm05:37034537-37036804	1.55012	271.869	7.45438	G7LC78 Ethylene-responsive transcription factor n=1 Tax=Medicago truncatula RepID=G7LC78_MEDTR
								Glyma11g19240	Gm11:15935673-15937763	0.332465	59.4534	7.48241	Q2MJ03 Cytochrome P450 94A1 n=1 Tax=Medicago truncatula RepID=Q2MJ03_MEDTR
								Glyma08g15350	Gm08:11130573-11132460	0.485982	92.8642	7.57808	G7LC78 Ethylene-responsive transcription factor n=1 Tax=Medicago truncatula RepID=G7LC78_MEDTR
								Glyma01g04250	Gm01:3750043-3752379	6.26833	1240.53	7.62866	G7K464 N-hydroxythioamide S-beta-glucosyltransferase n=1 Tax=Medicago truncatula RepID=G7K464_MEDTR
								Glyma07g07771	Gm07:6452538-6460038	1.61209	356.319	7.78809	B9RDR2 Acyl-CoA thioesterase, putative n=1 Tax=Ricinus communis RepID=B9RDR2_RICCO
								Glyma04g39510	Gm04:45709286-45710878	0.274317	76.0819	8.11556	G7JAD3 Ethylene-responsive transcription factor ERF110 n=1 Tax=Medicago truncatula RepID=G7JAD3_MEDTR
								Glyma12g09240	Gm12:7053118-7055195	0.471555	200.758	8.73381	Q2MJ03 Cytochrome P450 94A1 n=1 Tax=Medicago truncatula RepID=Q2MJ03_MEDTR

## Sheet: S. table 2B
Supplementary Table 2B. List of DEGs in flooding stressed leaf tissue compared to non-stressed control tissue.
Down-regulated genes							Up-regulated genes
gene	locus	control	flood	log2(fold_change)	annotation		gene	locus	control	flood	log2(fold_change)	annotation
Glyma17g05500	Gm17:3836704-3840416	59.7502	0.193158	-8.27302	G7L105 (E E)-alpha-farnesene synthase n=1 Tax=Medicago truncatula RepID=G7L105_MEDTR		Glyma01g01080	Gm01:741674-745361	3.27189	13.1019	2.00158	G7KPN7 Receptor-like protein kinase n=1 Tax=Medicago truncatula RepID=G7KPN7_MEDTR
Glyma03g33803	Gm03:41279691-41281551	86.6709	0.282256	-8.2624	Q2HV44 Aquaporin PIP2-1 n=1 Tax=Medicago truncatula RepID=Q2HV44_MEDTR		Glyma04g08901	Gm04:7008326-7010401	2.64312	10.5864	2.0019	C9WA60 AP2 domain-containing transcription factor 2 n=1 Tax=Glycine max RepID=C9WA60_SOYBN
Glyma01g34300	Gm01:46676161-46677711	70.9178	0.241458	-8.19823	P39657 RuBisCO-associated protein n=1 Tax=Glycine max RepID=RUAP_SOYBN		Glyma17g13570	Gm17:10400372-10405370	9.71299	38.9458	2.00348	G7JNQ7 Eukaryotic translation initiation factor 4 gamma n=1 Tax=Medicago truncatula RepID=G7JNQ7_MEDTR
Glyma10g40701	Gm10:48030456-48032047	46.9705	0.181704	-8.01403	Q7Y168 Expressed protein n=2 Tax=Oryza sativa RepID=Q7Y168_ORYSJ		Glyma04g10260	Gm04:8465018-8466314	3.89891	15.6614	2.00607	B6SLI0 TPR domain containing protein n=1 Tax=Zea mays RepID=B6SLI0_MAIZE
Glyma06g11430	Gm06:8788824-8793541	25.0819	0.100325	-7.96582	Q9SYR0 Nitrate reductase (Fragment) n=1 Tax=Glycine max RepID=Q9SYR0_SOYBN		Glyma18g06076	Gm18:4674998-4680585	5.34434	21.47	2.00624	G7K0S2 With no lysine kinase n=1 Tax=Medicago truncatula RepID=G7K0S2_MEDTR
Glyma13g07540	Gm13:7718253-7723767	29.7406	0.124763	-7.8971	D7MJX8 Rhomboid family protein n=1 Tax=Arabidopsis lyrata subsp. lyrata RepID=D7MJX8_ARALL		Glyma03g41750	Gm03:47152422-47158248	3.13629	12.6076	2.00716	A7LHI0 WRKY43 (Fragment) n=1 Tax=Glycine max RepID=A7LHI0_SOYBN
Glyma18g06510	Gm18:5074644-5079669	1075.14	4.59589	-7.86996	B0LVF3 Dihydroflavonol reductase n=1 Tax=Glycine max RepID=B0LVF3_SOYBN		Glyma14g03600	Gm14:2338430-2344056	8.36093	33.6407	2.00847	F4IQ51 Transcription factor PIF4 n=1 Tax=Arabidopsis thaliana RepID=F4IQ51_ARATH
Glyma10g20570	Gm10:26161916-26168174	126.263	0.620564	-7.66864	O65808 Magnesium chelatase subunit n=1 Tax=Glycine max RepID=O65808_SOYBN		Glyma15g18360	Gm15:15098519-15100868	35.449	142.874	2.01092	A1E368 Xyloglucan endotransglycosylase n=1 Tax=Musa acuminata RepID=A1E368_MUSAC
Glyma06g45780	Gm06:48513030-48518225	21.468	0.105584	-7.66765	B1P189 Beta-ocimene synthase n=1 Tax=Phaseolus lunatus RepID=B1P189_PHALU		Glyma12g35000	Gm12:38104158-38106375	2.52387	10.1739	2.01117	Q52QR2 NAC domain protein NAC4 n=1 Tax=Glycine max RepID=Q52QR2_SOYBN
Glyma10g38910	Gm10:46648906-46650518	387.752	2.00094	-7.59831	P93169 Early light-induced protein n=1 Tax=Glycine max RepID=P93169_SOYBN		Glyma15g16490	Gm15:12796635-12798708	3.07952	12.4275	2.01276	B9RT28 Flavonol synthase/flavanone 3-hydroxylase, putative n=1 Tax=Ricinus communis RepID=B9RT28_RICCO
Glyma18g46286	Gm18:56047090-56061377	17.0453	0.0945127	-7.49465	G7L2J3 Membrane protein, putative n=1 Tax=Medicago truncatula RepID=G7L2J3_MEDTR		Glyma08g25030	Gm08:19259511-19267090	6.56654	26.5232	2.01405	A2Q3J8 Glutamine amidotransferase, class I, active site n=1 Tax=Medicago truncatula RepID=A2Q3J8_MEDTR
Glyma07g39180	Gm07:43729746-43736197	129.755	0.771974	-7.39302	O04589 F19K23.17 protein n=2 Tax=Arabidopsis thaliana RepID=O04589_ARATH		Glyma13g09768	Gm13:11354137-11355899	0.423203	1.70984	2.01444	#N/A
Glyma02g16170	Gm02:14579281-14585464	27.8	0.184894	-7.23224	C7AU21 DWARF27 n=2 Tax=Oryza sativa Japonica Group RepID=C7AU21_ORYSJ		Glyma06g46400	Gm06:49020837-49023395	1.41271	5.70836	2.01461	G7JEQ3 Inner membrane transport protein n=1 Tax=Medicago truncatula RepID=G7JEQ3_MEDTR
Glyma18g04081	Gm18:2844663-2849361	855.058	6.15953	-7.11706	C6T859 Beta-form rubisco activase n=1 Tax=Glycine max RepID=C6T859_SOYBN		Glyma04g04260	Gm04:3166004-3167465	0.461733	1.8662	2.01497	Q00M87 N-hydroxycinnamoyl/benzoyltransferase 3 n=2 Tax=Glycine max RepID=Q00M87_SOYBN
Glyma06g16600	Gm06:12978147-12983446	55.4287	0.408718	-7.08338	G7LFP8 Cyclase/dehydrase family protein n=1 Tax=Medicago truncatula RepID=G7LFP8_MEDTR		Glyma12g01580	Gm12:941451-942959	5.3346	21.567	2.01538	Q39818 Heat shock 22 kDa protein, mitochondrial n=1 Tax=Glycine max RepID=HS22M_SOYBN
Glyma10g12370	Gm10:13372222-13373218	74.8176	0.665086	-6.81369	D7LHZ7 Expressed protein n=1 Tax=Arabidopsis lyrata subsp. lyrata RepID=D7LHZ7_ARALL		Glyma13g26630	Gm13:29802443-29804961	20.5667	83.1666	2.01569	B7FMX0 NADPH:quinone oxidoreductase n=1 Tax=Medicago truncatula RepID=B7FMX0_MEDTR
Glyma03g40420	Gm03:46182023-46184614	18.1096	0.164623	-6.78145	Q8GT20 Benzyl alcohol O-benzoyltransferase n=1 Tax=Nicotiana tabacum RepID=BEBT_TOBAC		Glyma01g36030	Gm01:48481465-48486456	18.4643	74.7213	2.01678	G7K2M6 Auxin efflux carrier protein n=1 Tax=Medicago truncatula RepID=G7K2M6_MEDTR
Glyma16g10880	Gm16:11230916-11238976	574.064	5.34892	-6.74582	F4ZZ27 1-deoxy-D-xylulose 5-phosphate reductoisomerase n=1 Tax=Glycine max RepID=F4ZZ27_SOYBN		Glyma01g07940	Gm01:8910470-8913789	5.45337	22.0878	2.01803	B5A7G4 Salicylic acid methyl transferase-like protein n=1 Tax=Glycine max RepID=B5A7G4_SOYBN
Glyma04g40600	Gm04:46583201-46592799	20.5368	0.192952	-6.73383	G7J913 1-aminocyclopropane-1-carboxylate oxidase n=1 Tax=Medicago truncatula RepID=G7J913_MEDTR		Glyma12g04940	Gm12:3283353-3285720	0.813392	3.29663	2.01897	B9RZC0 Minor allergen Alt a, putative n=1 Tax=Ricinus communis RepID=B9RZC0_RICCO
Glyma11g34230	Gm11:36096506-36100186	613.805	5.86259	-6.7101	D4N5G3 Rubisco activase n=1 Tax=Glycine max RepID=D4N5G3_SOYBN		Glyma16g01400	Gm16:993442-997332	36.0135	145.977	2.01913	G7L8C9 Chaperone protein dnaJ n=2 Tax=Medicago truncatula RepID=G7L8C9_MEDTR
Glyma12g29110	Gm12:32488006-32489350	125.328	1.21684	-6.68643	G7L8U4 Ferredoxin I n=1 Tax=Medicago truncatula RepID=G7L8U4_MEDTR		Glyma13g23310	Gm13:26740183-26742430	1.76523	7.15756	2.01961	Q8H6R2 CTV.15 n=1 Tax=Citrus trifoliata RepID=Q8H6R2_PONTR
Glyma19g37100	Gm19:44366338-44368158	35.6664	0.362929	-6.61874	Q8S9A0 Glucosyltransferase-9 n=1 Tax=Vigna angularis RepID=Q8S9A0_PHAAN		Glyma10g09980	Gm10:9392127-9393616	0.519547	2.11129	2.0228	Q259M7 H0723C07.4 protein n=1 Tax=Oryza sativa RepID=Q259M7_ORYSA
Glyma14g23860	Gm14:28364195-28369510	26.1803	0.279585	-6.54905	B9RJ38 Chlorophyll synthase, putative n=1 Tax=Ricinus communis RepID=B9RJ38_RICCO		Glyma09g32890	Gm09:39423588-39428639	4.16916	16.9525	2.02367	G7I4A5 O-acyltransferase WSD1 n=1 Tax=Medicago truncatula RepID=G7I4A5_MEDTR
Glyma19g00270	Gm19:86881-92780	61.6128	0.711245	-6.43674	G7KHI6 Phosphate/phosphoenolpyruvate translocator n=1 Tax=Medicago truncatula RepID=G7KHI6_MEDTR		Glyma17g17730	Gm17:14765358-14769327	33.447	136.014	2.02381	O24080 Peroxidase2 n=1 Tax=Medicago sativa RepID=O24080_MEDSA
Glyma14g03360	Gm14:2162180-2166953	38.5176	0.447514	-6.42744	NA		Glyma15g09050	Gm15:6438748-6441948	1.18109	4.81451	2.02727	G7ZXK4 LRR receptor-like serine/threonine-protein kinase GSO1 n=1 Tax=Medicago truncatula RepID=G7ZXK4_MEDTR
Glyma18g47850	Gm18:57416060-57419236	306.445	3.62436	-6.40176	B9RM61 Thioredoxin f-type, putative n=1 Tax=Ricinus communis RepID=B9RM61_RICCO		Glyma09g00490	Gm09:215956-223116	10.0804	41.0915	2.02729	A6YAQ1 Ethylene receptor n=1 Tax=Glycine max RepID=A6YAQ1_SOYBN
Glyma10g31130	Gm10:39683895-39686140	15.8993	0.189204	-6.39288	G7I667 Ammonium transporter n=2 Tax=Medicago truncatula RepID=G7I667_MEDTR		Glyma15g16790	Gm15:13067627-13072526	0.662042	2.69885	2.02735	G7IU67 Serine carboxypeptidase n=1 Tax=Medicago truncatula RepID=G7IU67_MEDTR
Glyma02g06070	Gm02:4855156-4857840	39.724	0.476888	-6.38022	B5A7G5 Salicylic acid methyl transferase-like protein n=1 Tax=Glycine max RepID=B5A7G5_SOYBN		Glyma06g35710	Gm06:37768272-37769515	2.82145	11.508	2.02812	C6T283 Ethylene-responsive transcription factor 6 n=1 Tax=Glycine max RepID=C6T283_SOYBN
Glyma03g42260	Gm03:47503470-47512218	19.3311	0.242392	-6.31744	C0SNP2 Late elongated hypocotyl and circadian clock associated-1-like protein 2 n=1 Tax=Glycine max RepID=C0SNP2_SOYBN		Glyma02g17400	Gm02:15663856-15675865	23.3985	95.471	2.02865	G7IF88 Katanin p60 ATPase-containing subunit A-like protein n=1 Tax=Medicago truncatula RepID=G7IF88_MEDTR
Glyma13g38050	Gm13:38963245-38968980	21.6674	0.272372	-6.3138	G7IRJ6 Myrcene synthase n=1 Tax=Medicago truncatula RepID=G7IRJ6_MEDTR		Glyma13g11592	Gm13:14283650-14291858	7.18665	29.3314	2.02905	G7J8U1 Zinc finger protein CONSTANS-LIKE protein n=4 Tax=Medicago truncatula RepID=G7J8U1_MEDTR
Glyma03g40430	Gm03:46186711-46189817	39.1166	0.495856	-6.30171	G7L0T6 Benzoyl coenzyme A benzyl alcohol benzoyl transferase n=1 Tax=Medicago truncatula RepID=G7L0T6_MEDTR		Glyma05g30850	Gm05:36094740-36099322	0.502334	2.05441	2.03201	Q94F37 AT1G67850 protein n=1 Tax=Arabidopsis thaliana RepID=Q94F37_ARATH
Glyma14g03500	Gm14:2263264-2266340	98.6082	1.34597	-6.19499	C5I849 Phytoene synthase protein n=1 Tax=Fragaria x ananassa RepID=C5I849_FRAAN		Glyma15g05510	Gm15:3894128-3894831	8.08038	33.0785	2.0334	B9DG55 AT1G25275 protein n=1 Tax=Arabidopsis thaliana RepID=B9DG55_ARATH
Glyma19g44970	Gm19:50244045-50249070	87.0142	1.2044	-6.17486	Q2HTB9 Response regulator receiver; CCT n=1 Tax=Medicago truncatula RepID=Q2HTB9_MEDTR		Glyma15g16270	Gm15:12592164-12605186	3.28898	13.4777	2.03486	B9RTA5 Phospholipase d zeta, putative n=1 Tax=Ricinus communis RepID=B9RTA5_RICCO
Glyma06g11890	Gm06:9190028-9191856	446.142	6.28423	-6.14962	G7J4F9 Photosystem II 22 kDa protein n=1 Tax=Medicago truncatula RepID=G7J4F9_MEDTR		Glyma01g07046	Gm01:7576240-7581159	1.11806	4.58326	2.03537	G7JX53 Replication protein A1-like protein n=1 Tax=Medicago truncatula RepID=G7JX53_MEDTR
Glyma09g03270	Gm09:2299603-2301800	19.3604	0.285082	-6.08559	B9SAZ2 Reticuline oxidase, putative n=1 Tax=Ricinus communis RepID=B9SAZ2_RICCO		Glyma05g03300	Gm05:2530177-2534194	5.01354	20.5663	2.03638	B9RAG9 AMP-activated protein kinase, gamma regulatory subunit, putative n=1 Tax=Ricinus communis RepID=B9RAG9_RICCO
Glyma15g03620	Gm15:2525245-2532313	81.158	1.19518	-6.08543	G7IHR0 Beta-glucosidase D4 n=1 Tax=Medicago truncatula RepID=G7IHR0_MEDTR		Glyma15g07990	Gm15:5619702-5622118	12.7927	52.5231	2.03763	B9RZ87 Rnf5, putative n=1 Tax=Ricinus communis RepID=B9RZ87_RICCO
Glyma16g28070	Gm16:31995296-31996638	772.256	11.5633	-6.06145	Q43437 Photosystem II type I chlorophyll a/b-binding protein n=1 Tax=Glycine max RepID=Q43437_SOYBN		Glyma01g45520	Gm01:55750121-55752248	5.93451	24.385	2.03879	B9RY82 Methylthioribose kinase, putative n=1 Tax=Ricinus communis RepID=B9RY82_RICCO
Glyma06g46340	Gm06:48987250-48988468	22.4118	0.336466	-6.05765	G7JDK7 Aquaporin SIP1-1 n=1 Tax=Medicago truncatula RepID=G7JDK7_MEDTR		Glyma09g03490	Gm09:2489194-2495287	29.6697	122.012	2.03996	B9SV82 UDP-glucose 4-epimerase, putative n=1 Tax=Ricinus communis RepID=B9SV82_RICCO
Glyma03g29330	Gm03:37317202-37323833	211.492	3.24787	-6.02497	O65808 Magnesium chelatase subunit n=1 Tax=Glycine max RepID=O65808_SOYBN		Glyma16g32440	Gm16:35598613-35599743	1.99118	8.18978	2.0402	D7MLA8 Peptidoglycan-binding LysM domain-containing protein n=1 Tax=Arabidopsis lyrata subsp. lyrata RepID=D7MLA8_ARALL
Glyma02g10620	Gm02:8527666-8532569	19.3638	0.302643	-5.9996	G7KVN5 Plant-specific domain TIGR01589 family protein n=1 Tax=Medicago truncatula RepID=G7KVN5_MEDTR		Glyma03g40250	Gm03:46056515-46061577	18.612	76.5968	2.04105	I1LBG3 Acyl carrier protein n=2 Tax=Glycine max RepID=I1LBG3_SOYBN
Glyma16g34570	Gm16:37184847-37188130	201.236	3.15407	-5.99553	Q41399 Chalcone reductase n=2 Tax=Sesbania rostrata RepID=Q41399_SESRO		Glyma11g20940	Gm11:17800920-17803784	31.2081	128.496	2.04173	B7FH52 Polyadenylate-binding protein-interacting protein n=1 Tax=Medicago truncatula RepID=B7FH52_MEDTR
Glyma06g04740	Gm06:3354852-3355862	354.415	5.65031	-5.97097	B9R733 GAST1 protein, putative n=1 Tax=Ricinus communis RepID=B9R733_RICCO		Glyma18g52330	Gm18:60967957-60968725	0.995647	4.10737	2.04451	NA
Glyma14g01470	Gm14:826071-828002	238.204	3.80038	-5.96991	I1M6D5 Fructose-bisphosphate aldolase n=1 Tax=Glycine max RepID=I1M6D5_SOYBN		Glyma11g08550	Gm11:6048904-6057185	36.0672	149.064	2.04718	G7JYQ8 Aconitate hydratase n=1 Tax=Medicago truncatula RepID=G7JYQ8_MEDTR
Glyma04g41240	Gm04:47123613-47125136	37.8208	0.611376	-5.95098	NA		Glyma03g03480	Gm03:3225305-3227067	0.45915	1.89788	2.04735	B9IBX4 SAUR family protein n=1 Tax=Populus trichocarpa RepID=B9IBX4_POPTR
Glyma19g00620	Gm19:394160-396496	13.2982	0.220748	-5.91268	B9S665 Acetylglucosaminyltransferase, putative n=1 Tax=Ricinus communis RepID=B9S665_RICCO		Glyma16g04550	Gm16:3835193-3836189	2.68482	11.0993	2.04757	Q9FK55 Emb|CAB87627.1 n=1 Tax=Arabidopsis thaliana RepID=Q9FK55_ARATH
Glyma05g30040	Gm05:35459961-35464349	142.756	2.40375	-5.89212	Q9AT39 SHOOT1 protein n=1 Tax=Glycine max RepID=Q9AT39_SOYBN		Glyma09g34970	Gm09:41230219-41231568	1.44834	5.98873	2.04785	NA
Glyma07g03260	Gm07:2309662-2314218	43.4413	0.732069	-5.89094	B9RVA3 Hydrolase, putative n=1 Tax=Ricinus communis RepID=B9RVA3_RICCO		Glyma06g40740	Gm06:43913599-43918380	10.5699	43.7068	2.0479	C6ZS29 TIR-NBS-LRR type disease resistance protein n=1 Tax=Glycine max RepID=C6ZS29_SOYBN
Glyma07g05580	Gm07:4207394-4212089	293.022	5.1641	-5.82635	A1YZE0 Granule-bound starch synthase n=1 Tax=Glycine max RepID=A1YZE0_SOYBN		Glyma12g06406	Gm12:4344385-4347448	3.74175	15.4783	2.04846	G7JCG7 Two-component response regulator ARR1 n=1 Tax=Medicago truncatula RepID=G7JCG7_MEDTR
Glyma02g03210	Gm02:2480546-2482597	24.4423	0.440873	-5.79288	B6CAM2 Matrix metalloproteinase n=1 Tax=Glycine max RepID=B6CAM2_SOYBN		Glyma14g36860	Gm14:46159457-46162577	5.50441	22.7742	2.04874	B9S5N9 Copper ion binding protein, putative n=1 Tax=Ricinus communis RepID=B9S5N9_RICCO
Glyma04g35040	Gm04:41311866-41315910	15.0419	0.272644	-5.78583	Q8W437 PBng143 n=1 Tax=Vigna radiata RepID=Q8W437_VIGRA		Glyma13g15590	Gm13:19468522-19477472	0.365835	1.51395	2.04905	G7J6M1 Tir-nbs-lrr resistance protein n=1 Tax=Medicago truncatula RepID=G7J6M1_MEDTR
Glyma10g31110	Gm10:39668738-39670615	22.1497	0.408885	-5.75945	G7I667 Ammonium transporter n=2 Tax=Medicago truncatula RepID=G7I667_MEDTR		Glyma17g35450	Gm17:39424054-39430320	2.49751	10.3524	2.0514	Q9LJN9 Emb|CAB52444.1 n=1 Tax=Arabidopsis thaliana RepID=Q9LJN9_ARATH
Glyma12g29090	Gm12:32482766-32483888	102.419	1.92856	-5.73082	G7INP8 Ferredoxin I n=1 Tax=Medicago truncatula RepID=G7INP8_MEDTR		Glyma11g15810	Gm11:11466242-11468866	2.0866	8.64999	2.05154	G7IKN3 LOB domain protein n=1 Tax=Medicago truncatula RepID=G7IKN3_MEDTR
Glyma11g13570	Gm11:9626940-9630184	108.988	2.05377	-5.72974	Q308N9 Salt-tolerance protein n=1 Tax=Glycine max RepID=Q308N9_SOYBN		Glyma03g30550	Gm03:38484805-38500737	17.9813	74.6084	2.05284	B9SFL0 Sugar transporter, putative n=1 Tax=Ricinus communis RepID=B9SFL0_RICCO
Glyma08g07570	Gm08:5416681-5422025	11.7599	0.22273	-5.72243	G7JCQ7 White-brown-complex ABC transporter family n=1 Tax=Medicago truncatula RepID=G7JCQ7_MEDTR		Glyma11g05532	Gm11:3881661-3886983	1.31047	5.43875	2.05319	Q9XFX1 Cytochrome P450 n=1 Tax=Cicer arietinum RepID=Q9XFX1_CICAR
Glyma17g01560	Gm17:949185-951672	104.858	2.00563	-5.70823	O04589 F19K23.17 protein n=2 Tax=Arabidopsis thaliana RepID=O04589_ARATH		Glyma05g21680	Gm05:26473855-26476824	0.5667	2.35396	2.05443	Q05680 Auxin-responsive GH3 product n=1 Tax=Glycine max RepID=Q05680_SOYBN
Glyma11g29460	Gm11:30155459-30160850	561.451	10.9802	-5.67619	B0LVF3 Dihydroflavonol reductase n=1 Tax=Glycine max RepID=B0LVF3_SOYBN		Glyma01g35110	Gm01:47674344-47678727	6.41375	26.6578	2.05532	G7K852 Transmembrane protein 45B n=1 Tax=Medicago truncatula RepID=G7K852_MEDTR
Glyma11g35130	Gm11:36855886-36859844	80.2648	1.57475	-5.67157	G7JB75 Chlorophyll a-b binding protein CP29.3 n=1 Tax=Medicago truncatula RepID=G7JB75_MEDTR		Glyma13g36110	Gm13:37448822-37452872	6.25117	26.0048	2.05658	O81972 Cytochrome P450 82A2 n=1 Tax=Glycine max RepID=C82A2_SOYBN
Glyma15g36790	Gm15:42276594-42281671	6.71405	0.133374	-5.65364	E4MVG7 mRNA, clone: RTFL01-01-A04 n=1 Tax=Eutrema halophilum RepID=E4MVG7_THEHA		Glyma07g12850	Gm07:11292308-11299927	0.580942	2.4219	2.05967	B9SKH8 Dynamin, putative n=1 Tax=Ricinus communis RepID=B9SKH8_RICCO
Glyma10g27610	Gm10:36282844-36284580	83.6958	1.70234	-5.61956	G7I6M5 Protein PROTON GRADIENT REGULATION n=1 Tax=Medicago truncatula RepID=G7I6M5_MEDTR		Glyma02g38270	Gm02:43640685-43643143	0.317835	1.32616	2.0609	G7J445 Inter-alpha-trypsin inhibitor heavy chain H4 n=1 Tax=Medicago truncatula RepID=G7J445_MEDTR
[truncated: 3,439 more rows]

## Sheet: S. table 2C
Supplementary Table 2C. List of DEGs in flooding stressed leaf tissue compared to drought stressed leaf tissue.
[truncated: 2,501 more rows]
